# Supplementary material for: Reverse Transcriptase Inhibition Disrupts Repeat Element Life Cycle in Colorectal Cancer.
Source: Oxford University Press journal article supplement (doi:10.1158/2159-8290.cd-21-1117), 2022-06-02
Supplement: cd-21-1117_supplementary_data_s6_suppsd6.xlsx [file cd-21-1117_supplementary_data_s6_suppsd6.xlsx]

## Sheet: DE.coding
Data S6: Differential Expression Analysis of Coding Genes in P53-Mut Cell Lines treated with 3TC vs DMSO at Day 7
logFC	AveExpr	t	P.Value	adj.P.Val	gene.id	is.significant	ensembl.gene.id	chr	gene.symbol	gene.type	length	description	entrez.gene.id	uniprot.id	go.gene.id
0.546851	3.49658	6.53234	2.31762e-06	0.0211074	ENSG00000165304.7	TRUE	ENSG00000165304	9	MELK	protein_coding	2485	maternal embryonic leucine zipper kinase [Source:HGNC Symbol;Acc:HGNC:16870]	9833	Q14680	Q14680
-0.310035	7.85824	-6.37676	3.23039e-06	0.0211074	ENSG00000090861.15	TRUE	ENSG00000090861	16	AARS	protein_coding	3477	alanyl-tRNA synthetase [Source:HGNC Symbol;Acc:HGNC:20]	16	P49588	P49588
0.850066	2.13729	5.81847	1.09061e-05	0.0300717	ENSG00000105011.8	TRUE	ENSG00000105011	19	ASF1B	protein_coding	2059	anti-silencing function 1B histone chaperone [Source:HGNC Symbol;Acc:HGNC:20996]	55723	A0A024R7G4	A0A024R7G4
0.325128	4.65257	5.79963	1.13708e-05	0.0300717	ENSG00000151729.10	TRUE	ENSG00000151729	4	SLC25A4	protein_coding	4440	solute carrier family 25 member 4 [Source:HGNC Symbol;Acc:HGNC:10990]	291	A0A0S2Z3H3	A0A0S2Z3H3
0.808284	3.80025	5.75757	1.24825e-05	0.0300717	ENSG00000171848.14	TRUE	ENSG00000171848	2	RRM2	protein_coding	3673	ribonucleotide reductase regulatory subunit M2 [Source:HGNC Symbol;Acc:HGNC:10452]	6241	P31350	P31350
-0.502834	7.78182	-5.7122	1.3807e-05	0.0300717	ENSG00000149428.18	TRUE	ENSG00000149428	11	HYOU1	protein_coding	4529	hypoxia up-regulated 1 [Source:HGNC Symbol;Acc:HGNC:16931]	10525	B3KXH0	B3KXH0
-0.338289	7.1942	-5.5774	1.86563e-05	0.0320334	ENSG00000136997.17	TRUE	ENSG00000136997	8	MYC	protein_coding	2366	MYC proto-oncogene, bHLH transcription factor [Source:HGNC Symbol;Acc:HGNC:7553]	4609	A0A087WVR4	A0A087WVR4
0.289576	5.41596	5.46102	2.42313e-05	0.0320334	ENSG00000119906.12	TRUE	ENSG00000119906	10	SLF2	protein_coding	7288	SMC5-SMC6 complex localization factor 2 [Source:HGNC Symbol;Acc:HGNC:17814]	55719	Q8IX21	Q8IX21
-0.320845	7.43776	-5.44781	2.49633e-05	0.0320334	ENSG00000031698.12	TRUE	ENSG00000031698	1	SARS	protein_coding	1882	seryl-tRNA synthetase [Source:HGNC Symbol;Acc:HGNC:10537]	6301	Q5T5C7	Q5T5C7
0.425524	4.04856	5.41669	2.67787e-05	0.0320334	ENSG00000122952.16	TRUE	ENSG00000122952	10	ZWINT	protein_coding	1961	ZW10 interacting kinetochore protein [Source:HGNC Symbol;Acc:HGNC:13195]	11130	O95229	O95229
-0.447957	6.34733	-5.39692	2.80017e-05	0.0320334	ENSG00000092621.12	TRUE	ENSG00000092621	1	PHGDH	protein_coding	3180	phosphoglycerate dehydrogenase [Source:HGNC Symbol;Acc:HGNC:8923]	26227	O43175	O43175
0.758936	2.38382	5.34138	3.17506e-05	0.0320334	ENSG00000175305.17	TRUE	ENSG00000175305	8	CCNE2	protein_coding	3330	cyclin E2 [Source:HGNC Symbol;Acc:HGNC:1590]	9134	A0A024R9B0	A0A024R9B0
-0.696827	5.09658	-5.31115	3.40022e-05	0.0320334	ENSG00000275896.5	TRUE	ENSG00000275896	7	PRSS2	protein_coding	852	serine protease 2 [Source:HGNC Symbol;Acc:HGNC:9483]	5645	A6XMV9	A6XMV9
-0.349586	6.04347	-5.30707	3.4318e-05	0.0320334	ENSG00000177697.18	TRUE	ENSG00000177697	11	CD151	protein_coding	1857	CD151 molecule _Raph blood group_ [Source:HGNC Symbol;Acc:HGNC:1630]	977	A0A024RCB3	A0A024RCB3
0.300099	7.20842	5.17702	4.61298e-05	0.0376893	ENSG00000198408.13	TRUE	ENSG00000198408	10	OGA	protein_coding	5155	O-GlcNAcase [Source:HGNC Symbol;Acc:HGNC:7056]	10724	O60502	O60502
0.466858	5.52147	5.17687	4.61455e-05	0.0376893	ENSG00000140525.17	TRUE	ENSG00000140525	15	FANCI	protein_coding	4743	FA complementation group I [Source:HGNC Symbol;Acc:HGNC:25568]	55215	Q9NVI1	Q9NVI1
0.295922	6.55291	5.0703	5.887e-05	0.0409019	ENSG00000054654.16	TRUE	ENSG00000054654	14	SYNE2	protein_coding	21842	spectrin repeat containing nuclear envelope protein 2 [Source:HGNC Symbol;Acc:HGNC:17084]	23224	Q8WXH0	Q8WXH0
0.482729	3.91616	5.05244	6.13287e-05	0.0409019	ENSG00000136492.8	TRUE	ENSG00000136492	17	BRIP1	protein_coding	6048	BRCA1 interacting protein C-terminal helicase 1 [Source:HGNC Symbol;Acc:HGNC:20473]	83990	A0A024QZ45	A0A024QZ45
-0.282623	6.49668	-5.04422	6.24955e-05	0.0409019	ENSG00000166986.14	TRUE	ENSG00000166986	12	MARS	protein_coding	3592	methionyl-tRNA synthetase [Source:HGNC Symbol;Acc:HGNC:6898]	4141	P56192	P56192
1.28178	-0.731815	5.0435	6.25985e-05	0.0409019	ENSG00000225526.4	TRUE	ENSG00000225526	3	MKRN2OS	protein_coding	985	MKRN2 opposite strand [Source:HGNC Symbol;Acc:HGNC:40375]	100129480	H3BPM6	H3BPM6
0.507171	4.86758	5.00653	6.81376e-05	0.0424011	ENSG00000149212.11	TRUE	ENSG00000149212	11	SESN3	protein_coding	9558	sestrin 3 [Source:HGNC Symbol;Acc:HGNC:23060]	143686	P58005	P58005
-0.270266	5.80734	-4.97071	7.39801e-05	0.043273	ENSG00000244038.9	TRUE	ENSG00000244038	1	DDOST	protein_coding	2126	dolichyl-diphosphooligosaccharide--protein glycosyltransferase non-catalytic subunit [Source:HGNC Symbol;Acc:HGNC:2728]	1650	A0A024RAD5	A0A024RAD5
0.23468	5.44687	4.95685	7.63749e-05	0.043273	ENSG00000156504.16	TRUE	ENSG00000156504	X	FAM122B	protein_coding	4326	family with sequence similarity 122B [Source:HGNC Symbol;Acc:HGNC:30490]	159090	Q7Z309	Q7Z309
0.410578	5.97173	4.93956	7.9473e-05	0.043273	ENSG00000156802.12	TRUE	ENSG00000156802	8	ATAD2	protein_coding	5565	ATPase family, AAA domain containing 2 [Source:HGNC Symbol;Acc:HGNC:30123]	29028	A0A024R9G7	A0A024R9G7
0.576776	3.2735	4.89293	8.84785e-05	0.0462495	ENSG00000168016.14	TRUE	ENSG00000168016	3	TRANK1	protein_coding	11776	tetratricopeptide repeat and ankyrin repeat containing 1 [Source:HGNC Symbol;Acc:HGNC:29011]	9881	O15050	O15050
-0.349945	6.1314	-4.79135	0.000111851	0.0562182	ENSG00000140105.17	FALSE	ENSG00000140105	14	WARS	protein_coding	3092	tryptophanyl-tRNA synthetase [Source:HGNC Symbol;Acc:HGNC:12729]	7453	A0A024R6K8	A0A024R6K8
0.505245	3.60497	4.76554	0.000118727	0.0565579	ENSG00000092470.11	FALSE	ENSG00000092470	15	WDR76	protein_coding	3978	WD repeat domain 76 [Source:HGNC Symbol;Acc:HGNC:25773]	79968	A0A0C4DFX7	A0A0C4DFX7
-0.647065	3.43317	-4.75669	0.000121183	0.0565579	ENSG00000127399.14	FALSE	ENSG00000127399	7	LRRC61	protein_coding	1877	leucine rich repeat containing 61 [Source:HGNC Symbol;Acc:HGNC:21704]	65999	A0A090N7W5	A0A090N7W5
-0.589319	3.69886	-4.73145	0.000128471	0.056642	ENSG00000196154.11	FALSE	ENSG00000196154	1	S100A4	protein_coding	755	S100 calcium binding protein A4 [Source:HGNC Symbol;Acc:HGNC:10494]	6275	P26447	P26447
-1.06818	2.98692	-4.71782	0.000132591	0.056642	ENSG00000204983.13	FALSE	ENSG00000204983	7	PRSS1	protein_coding	1433	serine protease 1 [Source:HGNC Symbol;Acc:HGNC:9475]	5644	P07477	P07477
-0.206944	6.44573	-4.71207	0.000134367	0.056642	ENSG00000089248.6	FALSE	ENSG00000089248	12	ERP29	protein_coding	1735	endoplasmic reticulum protein 29 [Source:HGNC Symbol;Acc:HGNC:13799]	10961	P30040	P30040
-0.335761	5.66382	-4.66851	0.00014864	0.0607008	ENSG00000102317.17	FALSE	ENSG00000102317	X	RBM3	protein_coding	2162	RNA binding motif protein 3 [Source:HGNC Symbol;Acc:HGNC:9900]	5935	A0A024QYX3	A0A024QYX3
-0.369325	5.52518	-4.6161	0.000167857	0.0664713	ENSG00000183010.16	FALSE	ENSG00000183010	17	PYCR1	protein_coding	1904	pyrroline-5-carboxylate reductase 1 [Source:HGNC Symbol;Acc:HGNC:9721]	5831	E2QRB3	E2QRB3
0.290842	4.20444	4.59192	0.000177554	0.0682434	ENSG00000076382.16	FALSE	ENSG00000076382	17	SPAG5	protein_coding	4040	sperm associated antigen 5 [Source:HGNC Symbol;Acc:HGNC:13452]	10615	Q96R06	Q96R06
-0.292026	4.13973	-4.5667	0.000188267	0.0691081	ENSG00000128944.13	FALSE	ENSG00000128944	15	KNSTRN	protein_coding	1899	kinetochore localized astrin _SPAG5_ binding protein [Source:HGNC Symbol;Acc:HGNC:30767]	90417	Q9Y448	Q9Y448
0.327636	5.4326	4.54005	0.000200301	0.0691081	ENSG00000120738.7	FALSE	ENSG00000120738	5	EGR1	protein_coding	3138	early growth response 1 [Source:HGNC Symbol;Acc:HGNC:3238]	1958	P18146	P18146
-0.303641	5.58876	-4.53464	0.000202837	0.0691081	ENSG00000161714.11	FALSE	ENSG00000161714	17	PLCD3	protein_coding	6107	phospholipase C delta 3 [Source:HGNC Symbol;Acc:HGNC:9061]	113026	Q8N3E9	Q8N3E9
-0.417578	7.65849	-4.52843	0.000205786	0.0691081	ENSG00000166794.4	FALSE	ENSG00000166794	15	PPIB	protein_coding	1208	peptidylprolyl isomerase B [Source:HGNC Symbol;Acc:HGNC:9255]	5479	P23284	P23284
0.291332	6.03443	4.52747	0.000206246	0.0691081	ENSG00000198830.10	FALSE	ENSG00000198830	1	HMGN2	protein_coding	1496	high mobility group nucleosomal binding domain 2 [Source:HGNC Symbol;Acc:HGNC:4986]	3151	P05204	P05204
-0.535393	1.9105	-4.49103	0.000224494	0.0733423	ENSG00000167995.15	FALSE	ENSG00000167995	11	BEST1	protein_coding	5772	bestrophin 1 [Source:HGNC Symbol;Acc:HGNC:12703]	7439	O76090	O76090
0.316909	5.61544	4.46901	0.0002363	0.0753162	ENSG00000166801.15	FALSE	ENSG00000166801	11	FAM111A	protein_coding	6189	family with sequence similarity 111 member A [Source:HGNC Symbol;Acc:HGNC:24725]	63901	A0A024R4Z3	A0A024R4Z3
-0.234782	5.09808	-4.42487	0.000261891	0.0781584	ENSG00000108828.15	FALSE	ENSG00000108828	17	VAT1	protein_coding	2734	vesicle amine transport 1 [Source:HGNC Symbol;Acc:HGNC:16919]	10493	A0A024R1Z6	A0A024R1Z6
-0.559024	3.97979	-4.41678	0.000266871	0.0781584	ENSG00000117472.9	FALSE	ENSG00000117472	1	TSPAN1	protein_coding	1615	tetraspanin 1 [Source:HGNC Symbol;Acc:HGNC:20657]	10103	O60635	O60635
-0.596697	3.95973	-4.41509	0.000267923	0.0781584	ENSG00000184164.14	FALSE	ENSG00000184164	22	CRELD2	protein_coding	2622	cysteine rich with EGF like domains 2 [Source:HGNC Symbol;Acc:HGNC:28150]	79174	Q6UXH1	Q6UXH1
0.965814	1.81776	4.41132	0.000270291	0.0781584	ENSG00000129173.12	FALSE	ENSG00000129173	11	E2F8	protein_coding	3519	E2F transcription factor 8 [Source:HGNC Symbol;Acc:HGNC:24727]	79733	A0AVK6	A0AVK6
0.62721	3.76149	4.40372	0.000275121	0.0781584	ENSG00000151725.11	FALSE	ENSG00000151725	4	CENPU	protein_coding	1998	centromere protein U [Source:HGNC Symbol;Acc:HGNC:21348]	79682	Q71F23	Q71F23
1.04006	1.03348	4.39309	0.00028202	0.0784135	ENSG00000205129.8	FALSE	ENSG00000205129	4	C4ORF47	protein_coding	1134	chromosome 4 open reading frame 47 [Source:HGNC Symbol;Acc:HGNC:34346]	441054	A7E2U8	A7E2U8
-0.34568	3.85092	-4.38125	0.000289914	0.0789291	ENSG00000247596.8	FALSE	ENSG00000247596	3	TWF2	protein_coding	1718	twinfilin actin binding protein 2 [Source:HGNC Symbol;Acc:HGNC:9621]	11344	Q6IBS0	Q6IBS0
-0.244527	5.82936	-4.36767	0.00029924	0.0798054	ENSG00000120254.15	FALSE	ENSG00000120254	6	MTHFD1L	protein_coding	3604	methylenetetrahydrofolate dehydrogenase _NADP+ dependent_ 1 like [Source:HGNC Symbol;Acc:HGNC:21055]	25902	B7ZM99	B7ZM99
0.226406	5.05215	4.32632	0.000329538	0.0853777	ENSG00000125885.13	FALSE	ENSG00000125885	20	MCM8	protein_coding	7486	minichromosome maintenance 8 homologous recombination repair factor [Source:HGNC Symbol;Acc:HGNC:16147]	84515	Q9UJA3	Q9UJA3
-0.29094	7.26722	-4.32159	0.000333201	0.0853777	ENSG00000143321.18	FALSE	ENSG00000143321	1	HDGF	protein_coding	2380	heparin binding growth factor [Source:HGNC Symbol;Acc:HGNC:4856]	3068	P51858	P51858
-0.409728	8.11578	-4.31064	0.000341821	0.0859023	ENSG00000155660.10	FALSE	ENSG00000155660	7	PDIA4	protein_coding	2903	protein disulfide isomerase family A member 4 [Source:HGNC Symbol;Acc:HGNC:30167]	9601	A0A090N8Y2	A0A090N8Y2
-0.35779	5.77767	-4.26911	0.00037661	0.0928592	ENSG00000101255.10	FALSE	ENSG00000101255	20	TRIB3	protein_coding	2499	tribbles pseudokinase 3 [Source:HGNC Symbol;Acc:HGNC:16228]	57761	Q96RU7	Q96RU7
-0.751231	2.93435	-4.23395	0.000408835	0.0971587	ENSG00000196517.11	FALSE	ENSG00000196517	1	SLC6A9	protein_coding	3130	solute carrier family 6 member 9 [Source:HGNC Symbol;Acc:HGNC:11056]	6536	P48067	P48067
-1.29698	-0.841424	-4.23386	0.000408917	0.0971587	ENSG00000285816.1	FALSE	ENSG00000285816	11	AP000944.2	protein_coding	4256	novel protein, POLA2-CDC42EP2 readthrough	#N/A	#N/A	#N/A
-0.229826	5.45008	-4.21235	0.00042998	0.100339	ENSG00000117448.13	FALSE	ENSG00000117448	1	AKR1A1	protein_coding	1818	aldo-keto reductase family 1 member A1 [Source:HGNC Symbol;Acc:HGNC:380]	10327	P14550	P14550
0.627598	0.657996	4.19357	0.000449265	0.103	ENSG00000235863.3	FALSE	ENSG00000235863	6	B3GALT4	protein_coding	1694	beta-1,3-galactosyltransferase 4 [Source:HGNC Symbol;Acc:HGNC:919]	8705	B3KQP5	B3KQP5
-0.293486	6.15222	-4.17593	0.000468162	0.105035	ENSG00000103257.8	FALSE	ENSG00000103257	16	SLC7A5	protein_coding	4537	solute carrier family 7 member 5 [Source:HGNC Symbol;Acc:HGNC:11063]	8140	Q01650	Q01650
-0.257737	6.2821	-4.16267	0.000482879	0.105035	ENSG00000139514.12	FALSE	ENSG00000139514	13	SLC7A1	protein_coding	7347	solute carrier family 7 member 1 [Source:HGNC Symbol;Acc:HGNC:11057]	6541	A0A024RDQ9	A0A024RDQ9
-0.417934	7.38881	-4.15767	0.000488553	0.105035	ENSG00000168298.6	FALSE	ENSG00000168298	6	HIST1H1E	protein_coding	754	histone cluster 1 H1 family member e [Source:HGNC Symbol;Acc:HGNC:4718]	3008	A3R0T8	A3R0T8
0.405201	4.25603	4.15615	0.000490293	0.105035	ENSG00000144554.10	FALSE	ENSG00000144554	3	FANCD2	protein_coding	5219	FA complementation group D2 [Source:HGNC Symbol;Acc:HGNC:3585]	2177	A0A024R2G2	A0A024R2G2
-0.300001	5.01107	-4.12349	0.000529168	0.109244	ENSG00000129474.15	FALSE	ENSG00000129474	14	AJUBA	protein_coding	4262	ajuba LIM protein [Source:HGNC Symbol;Acc:HGNC:20250]	84962	Q96IF1	Q96IF1
-0.576049	2.80831	-4.11936	0.000534301	0.109244	ENSG00000128965.12	FALSE	ENSG00000128965	15	CHAC1	protein_coding	1849	ChaC glutathione specific gamma-glutamylcyclotransferase 1 [Source:HGNC Symbol;Acc:HGNC:28680]	79094	Q9BUX1	Q9BUX1
-0.175399	8.05657	-4.11878	0.000535019	0.109244	ENSG00000197157.10	FALSE	ENSG00000197157	7	SND1	protein_coding	3476	staphylococcal nuclease and tudor domain containing 1 [Source:HGNC Symbol;Acc:HGNC:30646]	27044	A0A140VK49	A0A140VK49
0.579041	3.70452	4.10434	0.000553376	0.111254	ENSG00000139734.18	FALSE	ENSG00000139734	13	DIAPH3	protein_coding	4804	diaphanous related formin 3 [Source:HGNC Symbol;Acc:HGNC:15480]	81624	B4DPV3	B4DPV3
-0.246455	8.50726	-4.09157	0.000570136	0.112887	ENSG00000128272.14	FALSE	ENSG00000128272	22	ATF4	protein_coding	2019	activating transcription factor 4 [Source:HGNC Symbol;Acc:HGNC:786]	468	P18848	P18848
0.694203	2.34209	4.07842	0.000587931	0.1133	ENSG00000127564.16	FALSE	ENSG00000127564	16	PKMYT1	protein_coding	2308	protein kinase, membrane associated tyrosine/threonine 1 [Source:HGNC Symbol;Acc:HGNC:29650]	9088	Q99640	Q99640
-0.242291	6.06547	-4.07723	0.00058956	0.1133	ENSG00000101224.17	FALSE	ENSG00000101224	20	CDC25B	protein_coding	3597	cell division cycle 25B [Source:HGNC Symbol;Acc:HGNC:1726]	994	B4DIG0	B4DIG0
0.394475	3.83607	4.05184	0.000625598	0.116243	ENSG00000012963.14	FALSE	ENSG00000012963	14	UBR7	protein_coding	3694	ubiquitin protein ligase E3 component n-recognin 7 _putative_ [Source:HGNC Symbol;Acc:HGNC:20344]	55148	Q8N806	Q8N806
0.325671	6.24163	4.04392	0.000637275	0.116243	ENSG00000234745.10	FALSE	ENSG00000234745	6	HLA-B	protein_coding	1547	major histocompatibility complex, class I, B [Source:HGNC Symbol;Acc:HGNC:4932]	3106	E5FQ95	E5FQ95
-0.825203	0.438949	-4.03843	0.0006455	0.116243	ENSG00000273703.1	FALSE	ENSG00000273703	6	HIST1H2BM	protein_coding	381	histone cluster 1 H2B family member m [Source:HGNC Symbol;Acc:HGNC:4750]	8342	Q99879	Q99879
0.429757	3.20456	4.03657	0.000648309	0.116243	ENSG00000197299.11	FALSE	ENSG00000197299	15	BLM	protein_coding	5258	BLM RecQ like helicase [Source:HGNC Symbol;Acc:HGNC:1058]	641	P54132	P54132
0.480761	4.77823	4.03588	0.000649355	0.116243	ENSG00000012048.21	FALSE	ENSG00000012048	17	BRCA1	protein_coding	7270	BRCA1, DNA repair associated [Source:HGNC Symbol;Acc:HGNC:1100]	672	P38398	P38398
0.960829	0.0118113	4.02991	0.000658476	0.116283	ENSG00000137133.10	FALSE	ENSG00000137133	9	HINT2	protein_coding	2167	histidine triad nucleotide binding protein 2 [Source:HGNC Symbol;Acc:HGNC:18344]	84681	Q9BX68	Q9BX68
0.21988	4.87562	4.00556	0.00069701	0.121383	ENSG00000163755.8	FALSE	ENSG00000163755	3	HPS3	protein_coding	4665	HPS3, biogenesis of lysosomal organelles complex 2 subunit 1 [Source:HGNC Symbol;Acc:HGNC:15597]	84343	G5E9V4	G5E9V4
-0.17897	6.56318	-4.00012	0.000705929	0.121383	ENSG00000104635.13	FALSE	ENSG00000104635	8	SLC39A14	protein_coding	4641	solute carrier family 39 member 14 [Source:HGNC Symbol;Acc:HGNC:20858]	23516	Q15043	Q15043
0.550621	3.80656	3.98716	0.000727634	0.123195	ENSG00000139618.14	FALSE	ENSG00000139618	13	BRCA2	protein_coding	11986	BRCA2, DNA repair associated [Source:HGNC Symbol;Acc:HGNC:1101]	675	P51587	P51587
-0.270736	6.15414	-3.98265	0.000735326	0.123195	ENSG00000051108.14	FALSE	ENSG00000051108	16	HERPUD1	protein_coding	2946	homocysteine inducible ER protein with ubiquitin like domain 1 [Source:HGNC Symbol;Acc:HGNC:13744]	9709	Q15011	Q15011
-0.204907	9.2585	-3.96465	0.0007669	0.126859	ENSG00000187514.16	FALSE	ENSG00000187514	2	PTMA	protein_coding	1635	prothymosin alpha [Source:HGNC Symbol;Acc:HGNC:9623]	5757	P06454	P06454
0.736086	-0.464473	3.94796	0.00079739	0.128705	ENSG00000137462.7	FALSE	ENSG00000137462	4	TLR2	protein_coding	4200	toll like receptor 2 [Source:HGNC Symbol;Acc:HGNC:11848]	7097	A0A0S2Z4S4	A0A0S2Z4S4
0.25202	4.43367	3.94776	0.00079776	0.128705	ENSG00000198954.7	FALSE	ENSG00000198954	10	KIF1BP	protein_coding	2707	KIF1 binding protein [Source:HGNC Symbol;Acc:HGNC:23419]	26128	Q96EK5	Q96EK5
0.294064	4.57543	3.94021	0.000811949	0.129397	ENSG00000146530.13	FALSE	ENSG00000146530	7	VWDE	protein_coding	5936	von Willebrand factor D and EGF domains [Source:HGNC Symbol;Acc:HGNC:21897]	221806	Q8N2E2	Q8N2E2
-0.298611	2.56587	-3.92632	0.00083871	0.132051	ENSG00000163344.5	FALSE	ENSG00000163344	1	PMVK	protein_coding	1280	phosphomevalonate kinase [Source:HGNC Symbol;Acc:HGNC:9141]	10654	Q6FGV9	Q6FGV9
0.358293	4.54124	3.9174	0.000856364	0.133226	ENSG00000094804.10	FALSE	ENSG00000094804	17	CDC6	protein_coding	4810	cell division cycle 6 [Source:HGNC Symbol;Acc:HGNC:1744]	990	A0A024R1S2	A0A024R1S2
0.197278	5.13661	3.90736	0.00087666	0.133471	ENSG00000125124.11	FALSE	ENSG00000125124	16	BBS2	protein_coding	6073	Bardet-Biedl syndrome 2 [Source:HGNC Symbol;Acc:HGNC:967]	583	Q9BXC9	Q9BXC9
0.557852	3.33076	3.90541	0.000880671	0.133471	ENSG00000101057.15	FALSE	ENSG00000101057	20	MYBL2	protein_coding	2704	MYB proto-oncogene like 2 [Source:HGNC Symbol;Acc:HGNC:7548]	4605	P10244	P10244
-0.325278	4.31755	-3.90012	0.000891615	0.133471	ENSG00000112699.10	FALSE	ENSG00000112699	6	GMDS	protein_coding	1752	GDP-mannose 4,6-dehydratase [Source:HGNC Symbol;Acc:HGNC:4369]	2762	O60547	O60547
-0.365364	5.28614	-3.89463	0.000903104	0.133471	ENSG00000168159.11	FALSE	ENSG00000168159	1	RNF187	protein_coding	3017	ring finger protein 187 [Source:HGNC Symbol;Acc:HGNC:27146]	149603	Q5TA31	Q5TA31
0.526648	2.17783	3.89184	0.000909008	0.133471	ENSG00000126709.14	FALSE	ENSG00000126709	1	IFI6	protein_coding	841	interferon alpha inducible protein 6 [Source:HGNC Symbol;Acc:HGNC:4054]	2537	P09912	P09912
0.614546	3.52415	3.88112	0.000932025	0.135202	ENSG00000143476.17	FALSE	ENSG00000143476	1	DTL	protein_coding	4573	denticleless E3 ubiquitin protein ligase homolog [Source:HGNC Symbol;Acc:HGNC:30288]	51514	Q9NZJ0	Q9NZJ0
-0.547379	1.19703	-3.86975	0.000957092	0.135202	ENSG00000213185.6	FALSE	ENSG00000213185	10	FAM24B	protein_coding	745	family with sequence similarity 24 member B [Source:HGNC Symbol;Acc:HGNC:23475]	196792	Q8N5W8	Q8N5W8
-0.427725	4.52695	-3.86586	0.000965829	0.135202	ENSG00000163993.6	FALSE	ENSG00000163993	4	S100P	protein_coding	1279	S100 calcium binding protein P [Source:HGNC Symbol;Acc:HGNC:10504]	6286	P25815	P25815
-0.277768	5.24006	-3.86422	0.000969519	0.135202	ENSG00000105202.8	FALSE	ENSG00000105202	19	FBL	protein_coding	1400	fibrillarin [Source:HGNC Symbol;Acc:HGNC:3599]	2091	P22087	P22087
-0.232693	3.52721	-3.86277	0.000972813	0.135202	ENSG00000102178.12	FALSE	ENSG00000102178	X	UBL4A	protein_coding	2382	ubiquitin like 4A [Source:HGNC Symbol;Acc:HGNC:12505]	8266	P11441	P11441
0.33344	5.3552	3.85836	0.000982871	0.135202	ENSG00000164951.15	FALSE	ENSG00000164951	8	PDP1	protein_coding	4358	pyruvate dehyrogenase phosphatase catalytic subunit 1 [Source:HGNC Symbol;Acc:HGNC:9279]	54704	Q9P0J1	Q9P0J1
0.545697	2.72956	3.85165	0.000998384	0.135905	ENSG00000179750.15	FALSE	ENSG00000179750	22	APOBEC3B	protein_coding	1844	apolipoprotein B mRNA editing enzyme catalytic subunit 3B [Source:HGNC Symbol;Acc:HGNC:17352]	9582	Q9UH17	Q9UH17
-0.471953	2.49265	-3.84557	0.00101264	0.136425	ENSG00000116774.11	FALSE	ENSG00000116774	1	OLFML3	protein_coding	2063	olfactomedin like 3 [Source:HGNC Symbol;Acc:HGNC:24956]	56944	Q9NRN5	Q9NRN5
-0.255249	4.68454	-3.83151	0.0010464	0.139534	ENSG00000068438.14	FALSE	ENSG00000068438	X	FTSJ1	protein_coding	1986	FtsJ RNA methyltransferase homolog 1 [Source:HGNC Symbol;Acc:HGNC:13254]	24140	B7Z4K4	B7Z4K4
-0.23572	5.97012	-3.81965	0.00107574	0.140307	ENSG00000167767.13	FALSE	ENSG00000167767	12	KRT80	protein_coding	3894	keratin 80 [Source:HGNC Symbol;Acc:HGNC:27056]	144501	Q6KB66	Q6KB66
-0.255318	5.30298	-3.8196	0.00107587	0.140307	ENSG00000160818.16	FALSE	ENSG00000160818	1	GPATCH4	protein_coding	2464	G-patch domain containing 4 [Source:HGNC Symbol;Acc:HGNC:25982]	54865	A8KAG1	A8KAG1
-0.208295	6.69718	-3.81621	0.00108441	0.140307	ENSG00000134684.10	FALSE	ENSG00000134684	1	YARS	protein_coding	3238	tyrosyl-tRNA synthetase [Source:HGNC Symbol;Acc:HGNC:12840]	8565	A0A0S2Z4R1	A0A0S2Z4R1
0.322034	5.06496	3.80782	0.00110583	0.141677	ENSG00000156042.17	FALSE	ENSG00000156042	10	CFAP70	protein_coding	6686	cilia and flagella associated protein 70 [Source:HGNC Symbol;Acc:HGNC:30726]	118491	Q5T0N1	Q5T0N1
-0.425914	5.87581	-3.79983	0.00112663	0.142939	ENSG00000135069.13	FALSE	ENSG00000135069	9	PSAT1	protein_coding	2188	phosphoserine aminotransferase 1 [Source:HGNC Symbol;Acc:HGNC:19129]	29968	A0A024R280	A0A024R280
-0.327259	4.48318	-3.79039	0.00115169	0.144714	ENSG00000008283.15	FALSE	ENSG00000008283	17	CYB561	protein_coding	3200	cytochrome b561 [Source:HGNC Symbol;Acc:HGNC:2571]	1534	B3KTA1	B3KTA1
-0.727444	0.289491	-3.78136	0.00117618	0.146384	ENSG00000174586.10	FALSE	ENSG00000174586	19	ZNF497	protein_coding	3468	zinc finger protein 497 [Source:HGNC Symbol;Acc:HGNC:23714]	162968	Q6ZNH5	Q6ZNH5
0.391626	4.0215	3.76309	0.00122731	0.150296	ENSG00000176208.8	FALSE	ENSG00000176208	17	ATAD5	protein_coding	6869	ATPase family, AAA domain containing 5 [Source:HGNC Symbol;Acc:HGNC:25752]	79915	Q96QE3	Q96QE3
0.311397	4.93137	3.75476	0.00125137	0.150296	ENSG00000184743.12	FALSE	ENSG00000184743	11	ATL3	protein_coding	7135	atlastin GTPase 3 [Source:HGNC Symbol;Acc:HGNC:24526]	25923	B4DXC4	B4DXC4
-0.341075	4.84159	-3.75361	0.00125473	0.150296	ENSG00000110104.12	FALSE	ENSG00000110104	11	CCDC86	protein_coding	2567	coiled-coil domain containing 86 [Source:HGNC Symbol;Acc:HGNC:28359]	79080	Q9H6F5	Q9H6F5
0.462075	2.73178	3.74942	0.00126704	0.150296	ENSG00000085840.12	FALSE	ENSG00000085840	1	ORC1	protein_coding	3157	origin recognition complex subunit 1 [Source:HGNC Symbol;Acc:HGNC:8487]	4998	Q13415	Q13415
0.259504	5.14885	3.74661	0.00127536	0.150296	ENSG00000173530.5	FALSE	ENSG00000173530	8	TNFRSF10D	protein_coding	3538	TNF receptor superfamily member 10d [Source:HGNC Symbol;Acc:HGNC:11907]	8793	Q9UBN6	Q9UBN6
-0.243804	10.6107	-3.73977	0.00129583	0.150296	ENSG00000111057.10	FALSE	ENSG00000111057	12	KRT18	protein_coding	2088	keratin 18 [Source:HGNC Symbol;Acc:HGNC:6430]	3875	A0A024RAY2	A0A024RAY2
-0.344729	9.10137	-3.73966	0.00129615	0.150296	ENSG00000044574.7	FALSE	ENSG00000044574	9	HSPA5	protein_coding	3908	heat shock protein family A _Hsp70_ member 5 [Source:HGNC Symbol;Acc:HGNC:5238]	3309	P11021	P11021
0.256059	4.9966	3.73851	0.00129962	0.150296	ENSG00000146918.19	FALSE	ENSG00000146918	7	NCAPG2	protein_coding	5253	non-SMC condensin II complex subunit G2 [Source:HGNC Symbol;Acc:HGNC:21904]	54892	B3KRQ2	B3KRQ2
0.65825	2.17187	3.71508	0.0013725	0.157331	ENSG00000102057.9	FALSE	ENSG00000102057	X	KCND1	protein_coding	4437	potassium voltage-gated channel subfamily D member 1 [Source:HGNC Symbol;Acc:HGNC:6237]	3750	Q9NSA2	Q9NSA2
0.363975	2.9981	3.70907	0.00139183	0.15816	ENSG00000163378.13	FALSE	ENSG00000163378	3	EOGT	protein_coding	4731	EGF domain specific O-linked N-acetylglucosamine transferase [Source:HGNC Symbol;Acc:HGNC:28526]	285203	Q5NDL2	Q5NDL2
-0.195095	6.03871	-3.69598	0.00143487	0.1604	ENSG00000140350.15	FALSE	ENSG00000140350	15	ANP32A	protein_coding	3711	acidic nuclear phosphoprotein 32 family member A [Source:HGNC Symbol;Acc:HGNC:13233]	8125	P39687	P39687
-0.209233	7.49638	-3.69561	0.00143609	0.1604	ENSG00000149136.8	FALSE	ENSG00000149136	11	SSRP1	protein_coding	6296	structure specific recognition protein 1 [Source:HGNC Symbol;Acc:HGNC:11327]	6749	A0A024R4Z6	A0A024R4Z6
0.609474	3.24514	3.68425	0.00147455	0.161991	ENSG00000137804.12	FALSE	ENSG00000137804	15	NUSAP1	protein_coding	2409	nucleolar and spindle associated protein 1 [Source:HGNC Symbol;Acc:HGNC:18538]	51203	Q9BXS6	Q9BXS6
0.156816	6.27938	3.68408	0.00147512	0.161991	ENSG00000126883.16	FALSE	ENSG00000126883	9	NUP214	protein_coding	7600	nucleoporin 214 [Source:HGNC Symbol;Acc:HGNC:8064]	8021	P35658	P35658
-0.508182	2.69978	-3.67102	0.00152061	0.164238	ENSG00000167994.11	FALSE	ENSG00000167994	11	RAB3IL1	protein_coding	2284	RAB3A interacting protein like 1 [Source:HGNC Symbol;Acc:HGNC:9780]	5866	Q8TBN0	Q8TBN0
-0.238659	4.31981	-3.67099	0.00152072	0.164238	ENSG00000128283.6	FALSE	ENSG00000128283	22	CDC42EP1	protein_coding	2181	CDC42 effector protein 1 [Source:HGNC Symbol;Acc:HGNC:17014]	11135	Q00587	Q00587
-0.762459	0.866616	-3.65543	0.00157675	0.165979	ENSG00000124253.10	FALSE	ENSG00000124253	20	PCK1	protein_coding	5074	phosphoenolpyruvate carboxykinase 1 [Source:HGNC Symbol;Acc:HGNC:8724]	5105	P35558	P35558
-0.399055	8.90379	-3.65301	0.00158564	0.165979	ENSG00000179218.13	FALSE	ENSG00000179218	19	CALR	protein_coding	1903	calreticulin [Source:HGNC Symbol;Acc:HGNC:1455]	811	P27797	P27797
0.440824	2.35391	3.65252	0.00158744	0.165979	ENSG00000147536.11	FALSE	ENSG00000147536	8	GINS4	protein_coding	3873	GINS complex subunit 4 [Source:HGNC Symbol;Acc:HGNC:28226]	84296	Q9BRT9	Q9BRT9
-0.384106	4.04086	-3.64945	0.00159882	0.165979	ENSG00000178826.10	FALSE	ENSG00000178826	7	TMEM139	protein_coding	2383	transmembrane protein 139 [Source:HGNC Symbol;Acc:HGNC:22058]	135932	Q8IV31	Q8IV31
0.248217	6.3611	3.64904	0.00160035	0.165979	ENSG00000116005.11	FALSE	ENSG00000116005	2	PCYOX1	protein_coding	5345	prenylcysteine oxidase 1 [Source:HGNC Symbol;Acc:HGNC:20588]	51449	Q9UHG3	Q9UHG3
0.193582	6.02464	3.64533	0.00161421	0.166098	ENSG00000101639.18	FALSE	ENSG00000101639	18	CEP192	protein_coding	8635	centrosomal protein 192 [Source:HGNC Symbol;Acc:HGNC:25515]	55125	Q8TEP8	Q8TEP8
0.488492	2.13864	3.63835	0.0016406	0.167388	ENSG00000128578.9	FALSE	ENSG00000128578	7	STRIP2	protein_coding	5115	striatin interacting protein 2 [Source:HGNC Symbol;Acc:HGNC:22209]	57464	Q9ULQ0	Q9ULQ0
0.418645	2.21724	3.63489	0.00165381	0.167388	ENSG00000154920.14	FALSE	ENSG00000154920	17	EME1	protein_coding	2354	essential meiotic structure-specific endonuclease 1 [Source:HGNC Symbol;Acc:HGNC:24965]	146956	Q96AY2	Q96AY2
-0.308697	3.45489	-3.63195	0.00166517	0.167388	ENSG00000238227.7	FALSE	ENSG00000238227	9	TMEM250	protein_coding	2823	transmembrane protein 250 [Source:HGNC Symbol;Acc:HGNC:31009]	90120	H0YL14	H0YL14
0.757584	2.01157	3.62499	0.00169228	0.16812	ENSG00000171320.14	FALSE	ENSG00000171320	8	ESCO2	protein_coding	3922	establishment of sister chromatid cohesion N-acetyltransferase 2 [Source:HGNC Symbol;Acc:HGNC:27230]	157570	Q56NI9	Q56NI9
0.316028	3.09851	3.62349	0.00169818	0.16812	ENSG00000183137.14	FALSE	ENSG00000183137	6	CEP57L1	protein_coding	3832	centrosomal protein 57 like 1 [Source:HGNC Symbol;Acc:HGNC:21561]	285753	Q8IYX8	Q8IYX8
0.235839	5.38937	3.61845	0.00171821	0.168823	ENSG00000080200.9	FALSE	ENSG00000080200	3	CRYBG3	protein_coding	10729	crystallin beta-gamma domain containing 3 [Source:HGNC Symbol;Acc:HGNC:34427]	131544	Q68DQ2	Q68DQ2
-0.198199	6.95324	-3.60927	0.0017552	0.171171	ENSG00000110619.17	FALSE	ENSG00000110619	11	CARS	protein_coding	5732	cysteinyl-tRNA synthetase [Source:HGNC Symbol;Acc:HGNC:1493]	833	P49589	P49589
-0.233939	4.53456	-3.60473	0.00177381	0.171705	ENSG00000148334.14	FALSE	ENSG00000148334	9	PTGES2	protein_coding	2331	prostaglandin E synthase 2 [Source:HGNC Symbol;Acc:HGNC:17822]	80142	A6NHH0	A6NHH0
0.426678	2.51411	3.59454	0.00181626	0.173441	ENSG00000051596.9	FALSE	ENSG00000051596	5	THOC3	protein_coding	1796	THO complex 3 [Source:HGNC Symbol;Acc:HGNC:19072]	84321	Q96J01	Q96J01
-0.220139	6.97863	-3.59232	0.00182563	0.173441	ENSG00000133706.17	FALSE	ENSG00000133706	5	LARS	protein_coding	4766	leucyl-tRNA synthetase [Source:HGNC Symbol;Acc:HGNC:6512]	51520	B4E266	B4E266
0.384533	3.38243	3.59034	0.00183405	0.173441	ENSG00000011143.16	FALSE	ENSG00000011143	17	MKS1	protein_coding	2397	Meckel syndrome, type 1 [Source:HGNC Symbol;Acc:HGNC:7121]	54903	Q9NXB0	Q9NXB0
-0.233654	6.66211	-3.58778	0.00184497	0.173441	ENSG00000071537.13	FALSE	ENSG00000071537	14	SEL1L	protein_coding	7925	SEL1L, ERAD E3 ligase adaptor subunit [Source:HGNC Symbol;Acc:HGNC:10717]	6400	Q9UBV2	Q9UBV2
-0.186471	6.5828	-3.58472	0.00185811	0.173441	ENSG00000090273.13	FALSE	ENSG00000090273	1	NUDC	protein_coding	1800	nuclear distribution C, dynein complex regulator [Source:HGNC Symbol;Acc:HGNC:8045]	10726	Q9Y266	Q9Y266
0.163386	6.68271	3.58018	0.00187779	0.173595	ENSG00000123066.8	FALSE	ENSG00000123066	12	MED13L	protein_coding	14615	mediator complex subunit 13 like [Source:HGNC Symbol;Acc:HGNC:22962]	23389	Q71F56	Q71F56
0.245675	3.65571	3.57605	0.00189586	0.173595	ENSG00000257727.5	FALSE	ENSG00000257727	12	CNPY2	protein_coding	1214	canopy FGF signaling regulator 2 [Source:HGNC Symbol;Acc:HGNC:13529]	10330	Q9Y2B0	Q9Y2B0
0.287013	3.8872	3.57325	0.00190818	0.173595	ENSG00000186532.11	FALSE	ENSG00000186532	17	SMYD4	protein_coding	4384	SET and MYND domain containing 4 [Source:HGNC Symbol;Acc:HGNC:21067]	114826	Q8IYR2	Q8IYR2
0.493706	2.18681	3.57219	0.00191289	0.173595	ENSG00000164933.11	FALSE	ENSG00000164933	8	SLC25A32	protein_coding	2891	solute carrier family 25 member 32 [Source:HGNC Symbol;Acc:HGNC:29683]	81034	A0A024R9D0	A0A024R9D0
-0.331019	3.83176	-3.5691	0.00192666	0.173638	ENSG00000004660.14	FALSE	ENSG00000004660	17	CAMKK1	protein_coding	3898	calcium/calmodulin dependent protein kinase kinase 1 [Source:HGNC Symbol;Acc:HGNC:1469]	84254	Q8N5S9	Q8N5S9
0.53377	2.76594	3.55804	0.0019767	0.174364	ENSG00000164603.11	FALSE	ENSG00000164603	7	BMT2	protein_coding	3981	base methyltransferase of 25S rRNA 2 homolog [Source:HGNC Symbol;Acc:HGNC:26475]	154743	Q1RMZ1	Q1RMZ1
0.282631	4.68979	3.55736	0.00197978	0.174364	ENSG00000164308.16	FALSE	ENSG00000164308	5	ERAP2	protein_coding	5705	endoplasmic reticulum aminopeptidase 2 [Source:HGNC Symbol;Acc:HGNC:29499]	64167	B2R769	B2R769
0.306997	4.38609	3.5556	0.00198787	0.174364	ENSG00000055211.13	FALSE	ENSG00000055211	6	GINM1	protein_coding	2026	glycoprotein integral membrane 1 [Source:HGNC Symbol;Acc:HGNC:21074]	116254	Q9NU53	Q9NU53
-0.294482	2.88117	-3.55556	0.00198808	0.174364	ENSG00000176101.11	FALSE	ENSG00000176101	9	SSNA1	protein_coding	1170	SS nuclear autoantigen 1 [Source:HGNC Symbol;Acc:HGNC:11321]	8636	A0A024R8G6	A0A024R8G6
0.318546	3.77091	3.54561	0.00203442	0.177239	ENSG00000067992.13	FALSE	ENSG00000067992	X	PDK3	protein_coding	4720	pyruvate dehydrogenase kinase 3 [Source:HGNC Symbol;Acc:HGNC:8811]	5165	Q15120	Q15120
-0.273235	6.37882	-3.54193	0.00205185	0.177573	ENSG00000100994.11	FALSE	ENSG00000100994	20	PYGB	protein_coding	4134	glycogen phosphorylase B [Source:HGNC Symbol;Acc:HGNC:9723]	5834	P11216	P11216
0.314906	3.64173	3.53723	0.00207431	0.178336	ENSG00000186625.13	FALSE	ENSG00000186625	6	KATNA1	protein_coding	1984	katanin catalytic subunit A1 [Source:HGNC Symbol;Acc:HGNC:6216]	11104	O75449	O75449
0.264309	6.44079	3.52865	0.00211593	0.180726	ENSG00000175455.14	FALSE	ENSG00000175455	3	CCDC14	protein_coding	7917	coiled-coil domain containing 14 [Source:HGNC Symbol;Acc:HGNC:25766]	64770	Q49A88	Q49A88
0.261117	7.47998	3.50999	0.00220933	0.183198	ENSG00000095564.13	FALSE	ENSG00000095564	10	BTAF1	protein_coding	7250	B-TFIID TATA-box binding protein associated factor 1 [Source:HGNC Symbol;Acc:HGNC:17307]	9044	O14981	O14981
-0.217482	8.96189	-3.50729	0.00222322	0.183198	ENSG00000105372.7	FALSE	ENSG00000105372	19	RPS19	protein_coding	2359	ribosomal protein S19 [Source:HGNC Symbol;Acc:HGNC:10402]	6223	B0ZBD0	B0ZBD0
-0.269407	4.81705	-3.50663	0.00222659	0.183198	ENSG00000084092.6	FALSE	ENSG00000084092	4	NOA1	protein_coding	3415	nitric oxide associated 1 [Source:HGNC Symbol;Acc:HGNC:28473]	84273	Q8NC60	Q8NC60
-0.991734	1.09281	-3.50493	0.00223535	0.183198	ENSG00000099864.17	FALSE	ENSG00000099864	19	PALM	protein_coding	2755	paralemmin [Source:HGNC Symbol;Acc:HGNC:8594]	5064	A0A024R207	A0A024R207
0.343312	2.71809	3.50331	0.00224375	0.183198	ENSG00000266094.7	FALSE	ENSG00000266094	1	RASSF5	protein_coding	5586	Ras association domain family member 5 [Source:HGNC Symbol;Acc:HGNC:17609]	83593	A8K5F3	A8K5F3
-0.279147	3.7914	-3.50151	0.00225314	0.183198	ENSG00000213722.8	FALSE	ENSG00000213722	6	DDAH2	protein_coding	1688	dimethylarginine dimethylaminohydrolase 2 [Source:HGNC Symbol;Acc:HGNC:2716]	23564	O95865	O95865
0.368021	2.05342	3.499	0.00226625	0.183198	ENSG00000219626.8	FALSE	ENSG00000219626	2	FAM228B	protein_coding	2616	family with sequence similarity 228 member B [Source:HGNC Symbol;Acc:HGNC:24736]	375190	A0A087WZA1	A0A087WZA1
0.340332	3.31834	3.49799	0.00227155	0.183198	ENSG00000123473.15	FALSE	ENSG00000123473	1	STIL	protein_coding	5225	STIL, centriolar assembly protein [Source:HGNC Symbol;Acc:HGNC:10879]	6491	Q15468	Q15468
0.239416	4.32669	3.49725	0.00227543	0.183198	ENSG00000125149.11	FALSE	ENSG00000125149	16	C16ORF70	protein_coding	2865	chromosome 16 open reading frame 70 [Source:HGNC Symbol;Acc:HGNC:29564]	80262	A0A024R6W4	A0A024R6W4
0.249626	3.82913	3.49542	0.00228507	0.183198	ENSG00000132003.9	FALSE	ENSG00000132003	19	ZSWIM4	protein_coding	4339	zinc finger SWIM-type containing 4 [Source:HGNC Symbol;Acc:HGNC:25704]	65249	Q9H7M6	Q9H7M6
-0.337187	9.90103	-3.48908	0.00231886	0.183698	ENSG00000166598.14	FALSE	ENSG00000166598	12	HSP90B1	protein_coding	3032	heat shock protein 90 beta family member 1 [Source:HGNC Symbol;Acc:HGNC:12028]	7184	P14625	P14625
0.281229	4.94827	3.48787	0.00232535	0.183698	ENSG00000010404.17	FALSE	ENSG00000010404	X	IDS	protein_coding	7619	iduronate 2-sulfatase [Source:HGNC Symbol;Acc:HGNC:5389]	3423	P22304	P22304
0.437332	2.20025	3.48636	0.00233348	0.183698	ENSG00000120256.10	FALSE	ENSG00000120256	6	LRP11	protein_coding	3260	LDL receptor related protein 11 [Source:HGNC Symbol;Acc:HGNC:16936]	84918	B4DS68	B4DS68
-0.330517	3.95803	-3.47773	0.00238051	0.186278	ENSG00000159792.9	FALSE	ENSG00000159792	16	PSKH1	protein_coding	3481	protein serine kinase H1 [Source:HGNC Symbol;Acc:HGNC:9529]	5681	P11801	P11801
0.519073	3.97395	3.47118	0.00241679	0.187991	ENSG00000189057.10	FALSE	ENSG00000189057	11	FAM111B	protein_coding	3488	family with sequence similarity 111 member B [Source:HGNC Symbol;Acc:HGNC:24200]	374393	Q6SJ93	Q6SJ93
-0.266439	7.20411	-3.46811	0.00243399	0.188184	ENSG00000205542.10	FALSE	ENSG00000205542	X	TMSB4X	protein_coding	1702	thymosin beta 4 X-linked [Source:HGNC Symbol;Acc:HGNC:11881]	7114	A2VCK8	A2VCK8
-0.834115	2.50421	-3.46515	0.0024507	0.188184	ENSG00000167183.2	FALSE	ENSG00000167183	17	PRR15L	protein_coding	1519	proline rich 15 like [Source:HGNC Symbol;Acc:HGNC:28149]	79170	A0A140VJT1	A0A140VJT1
-0.219713	8.14984	-3.46255	0.0024655	0.188184	ENSG00000196230.12	FALSE	ENSG00000196230	6	TUBB	protein_coding	2903	tubulin beta class I [Source:HGNC Symbol;Acc:HGNC:20778]	203068	B4DY90	B4DY90
0.425839	3.66316	3.45948	0.00248304	0.188184	ENSG00000090889.11	FALSE	ENSG00000090889	X	KIF4A	protein_coding	4348	kinesin family member 4A [Source:HGNC Symbol;Acc:HGNC:13339]	24137	O95239	O95239
0.319918	3.98573	3.45683	0.00249826	0.188184	ENSG00000165806.19	FALSE	ENSG00000165806	10	CASP7	protein_coding	2659	caspase 7 [Source:HGNC Symbol;Acc:HGNC:1508]	840	P55210	P55210
-0.693532	-0.349322	-3.45321	0.00251925	0.188184	ENSG00000172940.12	FALSE	ENSG00000172940	3	SLC22A13	protein_coding	2555	solute carrier family 22 member 13 [Source:HGNC Symbol;Acc:HGNC:8494]	9390	Q9Y226	Q9Y226
-0.494035	1.8128	-3.45065	0.00253417	0.188184	ENSG00000132423.11	FALSE	ENSG00000132423	6	COQ3	protein_coding	1335	coenzyme Q3, methyltransferase [Source:HGNC Symbol;Acc:HGNC:18175]	51805	Q9NZJ6	Q9NZJ6
-0.316443	3.92777	-3.44631	0.0025597	0.188184	ENSG00000140263.13	FALSE	ENSG00000140263	15	SORD	protein_coding	4909	sorbitol dehydrogenase [Source:HGNC Symbol;Acc:HGNC:11184]	6652	Q00796	Q00796
0.415636	4.43448	3.44596	0.00256176	0.188184	ENSG00000138160.5	FALSE	ENSG00000138160	10	KIF11	protein_coding	4860	kinesin family member 11 [Source:HGNC Symbol;Acc:HGNC:6388]	3832	P52732	P52732
0.223706	6.35432	3.44541	0.00256504	0.188184	ENSG00000204592.8	FALSE	ENSG00000204592	6	HLA-E	protein_coding	2601	major histocompatibility complex, class I, E [Source:HGNC Symbol;Acc:HGNC:4962]	3133	A8K8M6	A8K8M6
-0.402978	4.00942	-3.44328	0.00257767	0.188184	ENSG00000075643.5	FALSE	ENSG00000075643	18	MOCOS	protein_coding	6160	molybdenum cofactor sulfurase [Source:HGNC Symbol;Acc:HGNC:18234]	55034	Q96EN8	Q96EN8
0.356368	4.38099	3.4355	0.00262433	0.190526	ENSG00000146757.13	FALSE	ENSG00000146757	7	ZNF92	protein_coding	3210	zinc finger protein 92 [Source:HGNC Symbol;Acc:HGNC:13168]	168374	Q03936	Q03936
0.650951	2.13671	3.43284	0.0026405	0.190641	ENSG00000186871.6	FALSE	ENSG00000186871	X	ERCC6L	protein_coding	4344	ERCC excision repair 6 like, spindle assembly checkpoint helicase [Source:HGNC Symbol;Acc:HGNC:20794]	54821	Q2NKX8	Q2NKX8
-0.366574	2.84469	-3.42719	0.00267518	0.192084	ENSG00000160325.14	FALSE	ENSG00000160325	9	CACFD1	protein_coding	2880	calcium channel flower domain containing 1 [Source:HGNC Symbol;Acc:HGNC:1365]	11094	Q9UGQ2	Q9UGQ2
0.354465	2.31091	3.42193	0.0027078	0.192477	ENSG00000185480.11	FALSE	ENSG00000185480	12	PARPBP	protein_coding	3014	PARP1 binding protein [Source:HGNC Symbol;Acc:HGNC:26074]	55010	B4DZ31	B4DZ31
-0.206784	8.37234	-3.42156	0.00271011	0.192477	ENSG00000034510.5	FALSE	ENSG00000034510	2	TMSB10	protein_coding	496	thymosin beta 10 [Source:HGNC Symbol;Acc:HGNC:11879]	9168	P63313	P63313
0.273595	4.74476	3.41757	0.00273518	0.193207	ENSG00000166881.9	FALSE	ENSG00000166881	12	NEMP1	protein_coding	5590	nuclear envelope integral membrane protein 1 [Source:HGNC Symbol;Acc:HGNC:29001]	23306	O14524	O14524
-0.183444	4.78766	-3.40314	0.0028277	0.196068	ENSG00000116337.15	FALSE	ENSG00000116337	1	AMPD2	protein_coding	3899	adenosine monophosphate deaminase 2 [Source:HGNC Symbol;Acc:HGNC:469]	271	A0A024R098	A0A024R098
0.366463	3.45695	3.40189	0.00283583	0.196068	ENSG00000146670.9	FALSE	ENSG00000146670	11	CDCA5	protein_coding	2587	cell division cycle associated 5 [Source:HGNC Symbol;Acc:HGNC:14626]	113130	A0A024R5D6	A0A024R5D6
0.182865	5.8568	3.40096	0.00284195	0.196068	ENSG00000166004.14	FALSE	ENSG00000166004	11	CEP295	protein_coding	8057	centrosomal protein 295 [Source:HGNC Symbol;Acc:HGNC:29366]	85459	Q9C0D2	Q9C0D2
0.339399	3.94339	3.39998	0.00284834	0.196068	ENSG00000196247.11	FALSE	ENSG00000196247	7	ZNF107	protein_coding	6094	zinc finger protein 107 [Source:HGNC Symbol;Acc:HGNC:12887]	51427	A0A024R5Y9	A0A024R5Y9
-0.244812	4.71783	-3.39962	0.00285069	0.196068	ENSG00000139725.7	FALSE	ENSG00000139725	12	RHOF	protein_coding	3009	ras homolog family member F, filopodia associated [Source:HGNC Symbol;Acc:HGNC:15703]	54509	Q9HBH0	Q9HBH0
-0.241667	5.81854	-3.3934	0.00289184	0.197131	ENSG00000006704.10	FALSE	ENSG00000006704	7	GTF2IRD1	protein_coding	5868	GTF2I repeat domain containing 1 [Source:HGNC Symbol;Acc:HGNC:4661]	9569	Q9UHL9	Q9UHL9
0.424202	2.79356	3.38687	0.0029357	0.197131	ENSG00000109458.8	FALSE	ENSG00000109458	4	GAB1	protein_coding	7981	GRB2 associated binding protein 1 [Source:HGNC Symbol;Acc:HGNC:4066]	2549	Q13480	Q13480
0.291236	2.30548	3.38239	0.00296609	0.197131	ENSG00000198205.6	FALSE	ENSG00000198205	X	ZXDA	protein_coding	4113	zinc finger X-linked duplicated A [Source:HGNC Symbol;Acc:HGNC:13198]	7789	P98168	P98168
-0.374088	2.91775	-3.37917	0.00298817	0.197131	ENSG00000108784.9	FALSE	ENSG00000108784	17	NAGLU	protein_coding	2544	N-acetyl-alpha-glucosaminidase [Source:HGNC Symbol;Acc:HGNC:7632]	4669	A0A140VJE4	A0A140VJE4
0.256712	3.58042	3.37817	0.00299508	0.197131	ENSG00000120539.14	FALSE	ENSG00000120539	10	MASTL	protein_coding	3623	microtubule associated serine/threonine kinase like [Source:HGNC Symbol;Acc:HGNC:19042]	84930	Q96GX5	Q96GX5
-0.303431	3.69586	-3.37607	0.0030096	0.197131	ENSG00000105248.15	FALSE	ENSG00000105248	19	YJU2	protein_coding	1434	YJU2 splicing factor homolog [Source:HGNC Symbol;Acc:HGNC:25518]	55702	Q9BW85	Q9BW85
0.207235	4.6662	3.37496	0.0030173	0.197131	ENSG00000053900.10	FALSE	ENSG00000053900	4	ANAPC4	protein_coding	3807	anaphase promoting complex subunit 4 [Source:HGNC Symbol;Acc:HGNC:19990]	29945	B3KN47	B3KN47
-0.277453	3.87711	-3.37489	0.00301776	0.197131	ENSG00000182704.7	FALSE	ENSG00000182704	11	TSKU	protein_coding	3554	tsukushi, small leucine rich proteoglycan [Source:HGNC Symbol;Acc:HGNC:28850]	25987	A0A024R5J8	A0A024R5J8
-0.543561	5.13742	-3.37405	0.00302358	0.197131	ENSG00000184357.4	FALSE	ENSG00000184357	6	HIST1H1B	protein_coding	681	histone cluster 1 H1 family member b [Source:HGNC Symbol;Acc:HGNC:4719]	3009	P16401	P16401
0.20008	4.29532	3.37323	0.00302931	0.197131	ENSG00000213625.8	FALSE	ENSG00000213625	1	LEPROT	protein_coding	4625	leptin receptor overlapping transcript [Source:HGNC Symbol;Acc:HGNC:29477]	54741	A0A087X0N2	A0A087X0N2
0.566376	2.1259	3.37023	0.00305029	0.197131	ENSG00000136982.5	FALSE	ENSG00000136982	8	DSCC1	protein_coding	2314	DNA replication and sister chromatid cohesion 1 [Source:HGNC Symbol;Acc:HGNC:24453]	79075	Q9BVC3	Q9BVC3
0.258268	5.47668	3.36785	0.00306708	0.197131	ENSG00000107890.16	FALSE	ENSG00000107890	10	ANKRD26	protein_coding	6827	ankyrin repeat domain 26 [Source:HGNC Symbol;Acc:HGNC:29186]	22852	Q9UPS8	Q9UPS8
-0.901961	0.98972	-3.36464	0.00308978	0.197131	ENSG00000131187.9	FALSE	ENSG00000131187	5	F12	protein_coding	2049	coagulation factor XII [Source:HGNC Symbol;Acc:HGNC:3530]	2161	P00748	P00748
0.275115	4.6474	3.36346	0.00309819	0.197131	ENSG00000165943.4	FALSE	ENSG00000165943	14	MOAP1	protein_coding	2529	modulator of apoptosis 1 [Source:HGNC Symbol;Acc:HGNC:16658]	64112	Q96BY2	Q96BY2
-0.53647	0.632868	-3.35914	0.00312912	0.197131	ENSG00000115257.15	FALSE	ENSG00000115257	19	PCSK4	protein_coding	2855	proprotein convertase subtilisin/kexin type 4 [Source:HGNC Symbol;Acc:HGNC:8746]	54760	A0A140VJQ9	A0A140VJQ9
-0.333397	2.55598	-3.35798	0.00313747	0.197131	ENSG00000213465.7	FALSE	ENSG00000213465	11	ARL2	protein_coding	1228	ADP ribosylation factor like GTPase 2 [Source:HGNC Symbol;Acc:HGNC:693]	402	P36404	P36404
0.530585	2.80415	3.35419	0.00316493	0.197131	ENSG00000137310.11	FALSE	ENSG00000137310	6	TCF19	protein_coding	3290	transcription factor 19 [Source:HGNC Symbol;Acc:HGNC:11629]	6941	A0A1U9X8M7	A0A1U9X8M7
-0.301263	3.49451	-3.35126	0.00318632	0.197131	ENSG00000164093.16	FALSE	ENSG00000164093	4	PITX2	protein_coding	3359	paired like homeodomain 2 [Source:HGNC Symbol;Acc:HGNC:9005]	5308	Q99697	Q99697
-0.373617	2.83432	-3.34952	0.0031991	0.197131	ENSG00000215375.6	FALSE	ENSG00000215375	4	MYL5	protein_coding	2956	myosin light chain 5 [Source:HGNC Symbol;Acc:HGNC:7586]	4636	Q02045	Q02045
0.319397	4.3522	3.34668	0.00322009	0.197131	ENSG00000151849.14	FALSE	ENSG00000151849	13	CENPJ	protein_coding	5020	centromere protein J [Source:HGNC Symbol;Acc:HGNC:17272]	55835	A8K8P1	A8K8P1
0.185971	8.73303	3.34577	0.00322681	0.197131	ENSG00000181222.15	FALSE	ENSG00000181222	17	POLR2A	protein_coding	6751	RNA polymerase II subunit A [Source:HGNC Symbol;Acc:HGNC:9187]	#N/A	#N/A	#N/A
0.306462	4.92629	3.34448	0.00323638	0.197131	ENSG00000081870.11	FALSE	ENSG00000081870	1	HSPB11	protein_coding	915	heat shock protein family B _small_ member 11 [Source:HGNC Symbol;Acc:HGNC:25019]	51668	Q9Y547	Q9Y547
-0.678472	2.75705	-3.34437	0.00323722	0.197131	ENSG00000269028.3	FALSE	ENSG00000269028	3	MTRNR2L12	protein_coding	1049	MT-RNR2 like 12 [Source:HGNC Symbol;Acc:HGNC:37169]	100462981	P0CJ69	P0CJ69
-0.229704	6.88028	-3.34366	0.00324251	0.197131	ENSG00000129250.11	FALSE	ENSG00000129250	17	KIF1C	protein_coding	7919	kinesin family member 1C [Source:HGNC Symbol;Acc:HGNC:6317]	10749	O43896	O43896
-0.185841	3.745	-3.34355	0.00324328	0.197131	ENSG00000141741.11	FALSE	ENSG00000141741	17	MIEN1	protein_coding	1999	migration and invasion enhancer 1 [Source:HGNC Symbol;Acc:HGNC:28230]	84299	J3KTI2	J3KTI2
-0.212112	5.13719	-3.34082	0.00326371	0.197455	ENSG00000142453.11	FALSE	ENSG00000142453	19	CARM1	protein_coding	3330	coactivator associated arginine methyltransferase 1 [Source:HGNC Symbol;Acc:HGNC:23393]	10498	Q86X55	Q86X55
-0.209665	6.87157	-3.3352	0.00330613	0.199029	ENSG00000136731.12	FALSE	ENSG00000136731	2	UGGT1	protein_coding	10650	UDP-glucose glycoprotein glucosyltransferase 1 [Source:HGNC Symbol;Acc:HGNC:15663]	56886	Q9NYU2	Q9NYU2
-0.218525	6.14936	-3.33335	0.0033202	0.199029	ENSG00000068654.15	FALSE	ENSG00000068654	2	POLR1A	protein_coding	12749	RNA polymerase I subunit A [Source:HGNC Symbol;Acc:HGNC:17264]	25885	O95602	O95602
0.317828	4.37196	3.32871	0.0033558	0.200244	ENSG00000176890.15	FALSE	ENSG00000176890	18	TYMS	protein_coding	1662	thymidylate synthetase [Source:HGNC Symbol;Acc:HGNC:12441]	7298	P04818	P04818
-0.235605	7.7834	-3.32383	0.00339364	0.201438	ENSG00000196305.17	FALSE	ENSG00000196305	9	IARS	protein_coding	4656	isoleucyl-tRNA synthetase [Source:HGNC Symbol;Acc:HGNC:5330]	3376	P41252	P41252
-0.538356	2.31035	-3.32216	0.00340663	0.201438	ENSG00000128165.8	FALSE	ENSG00000128165	22	ADM2	protein_coding	4276	adrenomedullin 2 [Source:HGNC Symbol;Acc:HGNC:28898]	79924	Q7Z4H4	Q7Z4H4
-0.880217	1.635	-3.3183	0.00343695	0.202316	ENSG00000185130.5	FALSE	ENSG00000185130	6	HIST1H2BL	protein_coding	488	histone cluster 1 H2B family member l [Source:HGNC Symbol;Acc:HGNC:4748]	8340	Q99880	Q99880
0.204979	5.82318	3.3141	0.00347023	0.20259	ENSG00000168172.8	FALSE	ENSG00000168172	8	HOOK3	protein_coding	14398	hook microtubule tethering protein 3 [Source:HGNC Symbol;Acc:HGNC:23576]	84376	Q86VS8	Q86VS8
-0.17395	6.18478	-3.31224	0.00348511	0.20259	ENSG00000169223.14	FALSE	ENSG00000169223	5	LMAN2	protein_coding	1800	lectin, mannose binding 2 [Source:HGNC Symbol;Acc:HGNC:16986]	10960	Q12907	Q12907
0.231685	5.74142	3.30951	0.00350698	0.20259	ENSG00000126070.19	FALSE	ENSG00000126070	1	AGO3	protein_coding	19687	argonaute 3, RISC catalytic component [Source:HGNC Symbol;Acc:HGNC:18421]	192669	B4E1P5	B4E1P5
-0.157968	5.78222	-3.30902	0.00351098	0.20259	ENSG00000198373.12	FALSE	ENSG00000198373	16	WWP2	protein_coding	4515	WW domain containing E3 ubiquitin protein ligase 2 [Source:HGNC Symbol;Acc:HGNC:16804]	11060	B4DHF6	B4DHF6
-0.147671	6.38174	-3.30801	0.00351912	0.20259	ENSG00000142657.20	FALSE	ENSG00000142657	1	PGD	protein_coding	1885	phosphogluconate dehydrogenase [Source:HGNC Symbol;Acc:HGNC:8891]	5226	B4E2U0	B4E2U0
0.497928	1.72726	3.30387	0.00355264	0.203622	ENSG00000151014.5	FALSE	ENSG00000151014	4	NOCT	protein_coding	1952	nocturnin [Source:HGNC Symbol;Acc:HGNC:14254]	25819	Q9UK39	Q9UK39
0.734742	-1.9305	3.29767	0.00360352	0.204631	ENSG00000159231.5	FALSE	ENSG00000159231	21	CBR3	protein_coding	1169	carbonyl reductase 3 [Source:HGNC Symbol;Acc:HGNC:1549]	874	O75828	O75828
-0.262767	4.80199	-3.29692	0.00360975	0.204631	ENSG00000128309.16	FALSE	ENSG00000128309	22	MPST	protein_coding	5872	mercaptopyruvate sulfurtransferase [Source:HGNC Symbol;Acc:HGNC:7223]	4357	A0A140VJX3	A0A140VJX3
0.207363	5.09198	3.29602	0.00361722	0.204631	ENSG00000160336.14	FALSE	ENSG00000160336	19	ZNF761	protein_coding	4061	zinc finger protein 761 [Source:HGNC Symbol;Acc:HGNC:23179]	388561	A0A087WXT7	A0A087WXT7
-0.277905	4.40932	-3.29288	0.00364334	0.20522	ENSG00000221968.8	FALSE	ENSG00000221968	11	FADS3	protein_coding	5314	fatty acid desaturase 3 [Source:HGNC Symbol;Acc:HGNC:3576]	3995	A0A024R564	A0A024R564
1.12931	-0.317372	3.28962	0.00367062	0.205399	ENSG00000212128.2	FALSE	ENSG00000212128	12	TAS2R13	protein_coding	1637	taste 2 receptor member 13 [Source:HGNC Symbol;Acc:HGNC:14919]	50838	Q9NYV9	Q9NYV9
-0.290033	3.27994	-3.28876	0.00367794	0.205399	ENSG00000173599.13	FALSE	ENSG00000173599	11	PC	protein_coding	4192	pyruvate carboxylase [Source:HGNC Symbol;Acc:HGNC:8636]	5091	A0A024R5C5	A0A024R5C5
0.232797	6.26344	3.28477	0.00371172	0.206378	ENSG00000113441.15	FALSE	ENSG00000113441	5	LNPEP	protein_coding	12752	leucyl and cystinyl aminopeptidase [Source:HGNC Symbol;Acc:HGNC:6656]	4012	Q9UIQ6	Q9UIQ6
0.334451	3.2461	3.28297	0.00372707	0.206378	ENSG00000133119.12	FALSE	ENSG00000133119	13	RFC3	protein_coding	2402	replication factor C subunit 3 [Source:HGNC Symbol;Acc:HGNC:9971]	5983	A0A024RDQ8	A0A024RDQ8
0.348234	3.65047	3.27794	0.00377023	0.207888	ENSG00000112406.4	FALSE	ENSG00000112406	6	HECA	protein_coding	5614	hdc homolog, cell cycle regulator [Source:HGNC Symbol;Acc:HGNC:21041]	51696	Q9UBI9	Q9UBI9
-0.627695	2.61428	-3.27279	0.00381493	0.209468	ENSG00000163347.5	FALSE	ENSG00000163347	3	CLDN1	protein_coding	3481	claudin 1 [Source:HGNC Symbol;Acc:HGNC:2032]	9076	A5JSJ9	A5JSJ9
0.221292	3.81288	3.26965	0.00384245	0.210097	ENSG00000086189.9	FALSE	ENSG00000086189	5	DIMT1	protein_coding	2859	DIM1 dimethyladenosine transferase 1 homolog [Source:HGNC Symbol;Acc:HGNC:30217]	27292	A0A0C4DGB1	A0A0C4DGB1
-0.232279	6.94021	-3.26703	0.00386561	0.210288	ENSG00000205336.11	FALSE	ENSG00000205336	16	ADGRG1	protein_coding	4254	adhesion G protein-coupled receptor G1 [Source:HGNC Symbol;Acc:HGNC:4512]	9289	A0A0S2Z517	A0A0S2Z517
-1.14725	0.12317	-3.26438	0.0038891	0.210288	ENSG00000118514.13	FALSE	ENSG00000118514	6	ALDH8A1	protein_coding	2558	aldehyde dehydrogenase 8 family member A1 [Source:HGNC Symbol;Acc:HGNC:15471]	64577	Q9H2A2	Q9H2A2
0.398684	2.89837	3.26381	0.00389422	0.210288	ENSG00000159147.17	FALSE	ENSG00000159147	21	DONSON	protein_coding	2332	downstream neighbor of SON [Source:HGNC Symbol;Acc:HGNC:2993]	29980	Q9NYP3	Q9NYP3
-0.869383	-0.872749	-3.25661	0.0039589	0.212901	ENSG00000160200.17	FALSE	ENSG00000160200	21	CBS	protein_coding	2656	cystathionine-beta-synthase [Source:HGNC Symbol;Acc:HGNC:1550]	875	P0DN79	P0DN79
-0.513541	2.65948	-3.25182	0.00400255	0.214366	ENSG00000278463.1	FALSE	ENSG00000278463	6	HIST1H2AB	protein_coding	393	histone cluster 1 H2A family member b [Source:HGNC Symbol;Acc:HGNC:4734]	8335	P04908	P04908
-0.152561	8.47059	-3.24824	0.00403547	0.214603	ENSG00000185624.14	FALSE	ENSG00000185624	17	P4HB	protein_coding	2603	prolyl 4-hydroxylase subunit beta [Source:HGNC Symbol;Acc:HGNC:8548]	5034	A0A024R8S5	A0A024R8S5
0.168308	5.84246	3.24677	0.00404902	0.214603	ENSG00000166949.15	FALSE	ENSG00000166949	15	SMAD3	protein_coding	6247	SMAD family member 3 [Source:HGNC Symbol;Acc:HGNC:6769]	4088	P84022	P84022
-0.239668	4.9674	-3.24589	0.00405716	0.214603	ENSG00000091640.7	FALSE	ENSG00000091640	17	SPAG7	protein_coding	1668	sperm associated antigen 7 [Source:HGNC Symbol;Acc:HGNC:11216]	9552	O75391	O75391
-0.210891	6.57953	-3.24323	0.00408195	0.214603	ENSG00000140264.19	FALSE	ENSG00000140264	15	SERF2	protein_coding	2792	small EDRK-rich factor 2 [Source:HGNC Symbol;Acc:HGNC:10757]	10169	P84101	P84101
0.380752	3.65632	3.24067	0.00410586	0.214603	ENSG00000123219.12	FALSE	ENSG00000123219	5	CENPK	protein_coding	1734	centromere protein K [Source:HGNC Symbol;Acc:HGNC:29479]	64105	Q9BS16	Q9BS16
0.294736	3.72383	3.23928	0.00411892	0.214603	ENSG00000037042.8	FALSE	ENSG00000037042	17	TUBG2	protein_coding	1776	tubulin gamma 2 [Source:HGNC Symbol;Acc:HGNC:12419]	27175	A0A1B4Z394	A0A1B4Z394
0.213531	4.48731	3.23854	0.00412594	0.214603	ENSG00000184708.17	FALSE	ENSG00000184708	22	EIF4ENIF1	protein_coding	3695	eukaryotic translation initiation factor 4E nuclear import factor 1 [Source:HGNC Symbol;Acc:HGNC:16687]	56478	A0A024R1K0	A0A024R1K0
-0.204568	4.41493	-3.23487	0.00416064	0.214603	ENSG00000007080.10	FALSE	ENSG00000007080	19	CCDC124	protein_coding	1055	coiled-coil domain containing 124 [Source:HGNC Symbol;Acc:HGNC:25171]	115098	A0A024R7M8	A0A024R7M8
-0.312319	4.80139	-3.23328	0.00417582	0.214603	ENSG00000180891.12	FALSE	ENSG00000180891	17	CUEDC1	protein_coding	3621	CUE domain containing 1 [Source:HGNC Symbol;Acc:HGNC:31350]	404093	Q9NWM3	Q9NWM3
0.453717	2.12145	3.22993	0.00420793	0.214603	ENSG00000014138.8	FALSE	ENSG00000014138	11	POLA2	protein_coding	3744	DNA polymerase alpha 2, accessory subunit [Source:HGNC Symbol;Acc:HGNC:30073]	23649	Q14181	Q14181
0.608486	1.47924	3.22895	0.00421735	0.214603	ENSG00000136943.10	FALSE	ENSG00000136943	9	CTSV	protein_coding	4322	cathepsin V [Source:HGNC Symbol;Acc:HGNC:2538]	1515	A0A024R141	A0A024R141
-0.208233	5.18809	-3.22802	0.00422626	0.214603	ENSG00000143256.4	FALSE	ENSG00000143256	1	PFDN2	protein_coding	677	prefoldin subunit 2 [Source:HGNC Symbol;Acc:HGNC:8867]	5202	B1AQP2	B1AQP2
0.237548	4.59917	3.22603	0.00424558	0.214603	ENSG00000123374.10	FALSE	ENSG00000123374	12	CDK2	protein_coding	2598	cyclin dependent kinase 2 [Source:HGNC Symbol;Acc:HGNC:1771]	1017	B4DDL9	B4DDL9
-0.196409	4.7781	-3.22447	0.00426073	0.214603	ENSG00000189306.10	FALSE	ENSG00000189306	22	RRP7A	protein_coding	3801	ribosomal RNA processing 7 homolog A [Source:HGNC Symbol;Acc:HGNC:24286]	27341	Q9Y3A4	Q9Y3A4
-0.398138	1.29947	-3.22372	0.00426798	0.214603	ENSG00000185630.18	FALSE	ENSG00000185630	1	PBX1	protein_coding	11321	PBX homeobox 1 [Source:HGNC Symbol;Acc:HGNC:8632]	5087	A8K5V0	A8K5V0
-1.01067	-2.28068	-3.21931	0.00431125	0.214603	ENSG00000178573.6	FALSE	ENSG00000178573	16	MAF	protein_coding	6384	MAF bZIP transcription factor [Source:HGNC Symbol;Acc:HGNC:6776]	4094	O75444	O75444
-0.198313	5.84802	-3.21849	0.00431924	0.214603	ENSG00000126247.10	FALSE	ENSG00000126247	19	CAPNS1	protein_coding	1918	calpain small subunit 1 [Source:HGNC Symbol;Acc:HGNC:1481]	826	P04632	P04632
0.517857	2.44607	3.21813	0.00432287	0.214603	ENSG00000148908.14	FALSE	ENSG00000148908	10	RGS10	protein_coding	852	regulator of G protein signaling 10 [Source:HGNC Symbol;Acc:HGNC:9992]	6001	O43665	O43665
-0.212952	4.1216	-3.2175	0.00432905	0.214603	ENSG00000172728.15	FALSE	ENSG00000172728	8	FUT10	protein_coding	3825	fucosyltransferase 10 [Source:HGNC Symbol;Acc:HGNC:19234]	84750	Q6P4F1	Q6P4F1
-1.15627	0.894881	-3.21686	0.00433542	0.214603	ENSG00000176046.8	FALSE	ENSG00000176046	16	NUPR1	protein_coding	5491	nuclear protein 1, transcriptional regulator [Source:HGNC Symbol;Acc:HGNC:29990]	26471	O60356	O60356
0.456164	3.20235	3.21346	0.00436914	0.215123	ENSG00000138658.15	FALSE	ENSG00000138658	4	ZGRF1	protein_coding	6652	zinc finger GRF-type containing 1 [Source:HGNC Symbol;Acc:HGNC:25654]	55345	Q86YA3	Q86YA3
-0.485378	4.94884	-3.21249	0.00437884	0.215123	ENSG00000274267.1	FALSE	ENSG00000274267	6	HIST1H3B	protein_coding	411	histone cluster 1 H3 family member b [Source:HGNC Symbol;Acc:HGNC:4776]	8358	P68431	P68431
0.150796	5.93439	3.20486	0.00445577	0.216779	ENSG00000128829.11	FALSE	ENSG00000128829	15	EIF2AK4	protein_coding	5499	eukaryotic translation initiation factor 2 alpha kinase 4 [Source:HGNC Symbol;Acc:HGNC:19687]	440275	Q9P2K8	Q9P2K8
0.511961	2.7427	3.20448	0.0044596	0.216779	ENSG00000169607.12	FALSE	ENSG00000169607	2	CKAP2L	protein_coding	4533	cytoskeleton associated protein 2 like [Source:HGNC Symbol;Acc:HGNC:26877]	150468	Q8IYA6	Q8IYA6
0.232434	4.71963	3.20421	0.00446231	0.216779	ENSG00000175066.15	FALSE	ENSG00000175066	3	GK5	protein_coding	9837	glycerol kinase 5 [Source:HGNC Symbol;Acc:HGNC:28635]	256356	Q6ZS86	Q6ZS86
-0.255038	6.70083	-3.19757	0.0045304	0.218848	ENSG00000182199.10	FALSE	ENSG00000182199	12	SHMT2	protein_coding	3416	serine hydroxymethyltransferase 2 [Source:HGNC Symbol;Acc:HGNC:10852]	6472	P34897	P34897
0.202161	4.78194	3.1968	0.00453841	0.218848	ENSG00000154124.4	FALSE	ENSG00000154124	5	OTULIN	protein_coding	7800	OTU deubiquitinase with linear linkage specificity [Source:HGNC Symbol;Acc:HGNC:25118]	90268	Q96BN8	Q96BN8
-0.197345	6.00327	-3.19311	0.00457673	0.219503	ENSG00000100029.17	FALSE	ENSG00000100029	22	PES1	protein_coding	2760	pescadillo ribosomal biogenesis factor 1 [Source:HGNC Symbol;Acc:HGNC:8848]	23481	O00541	O00541
-1.21128	-0.862618	-3.19227	0.00458557	0.219503	ENSG00000138080.13	FALSE	ENSG00000138080	2	EMILIN1	protein_coding	3943	elastin microfibril interfacer 1 [Source:HGNC Symbol;Acc:HGNC:19880]	11117	Q9Y6C2	Q9Y6C2
-0.2311	6.94896	-3.1882	0.00462822	0.220165	ENSG00000106105.13	FALSE	ENSG00000106105	7	GARS	protein_coding	2634	glycyl-tRNA synthetase [Source:HGNC Symbol;Acc:HGNC:4162]	2617	A0A090N8G0	A0A090N8G0
0.350611	3.26279	3.18495	0.00466271	0.220165	ENSG00000091651.8	FALSE	ENSG00000091651	16	ORC6	protein_coding	1833	origin recognition complex subunit 6 [Source:HGNC Symbol;Acc:HGNC:17151]	23594	A0A024R6R3	A0A024R6R3
-1.07313	-1.77217	-3.18363	0.00467673	0.220165	ENSG00000144671.10	FALSE	ENSG00000144671	3	SLC22A14	protein_coding	2277	solute carrier family 22 member 14 [Source:HGNC Symbol;Acc:HGNC:8495]	9389	Q9Y267	Q9Y267
0.509074	1.70384	3.18123	0.00470239	0.220165	ENSG00000144935.14	FALSE	ENSG00000144935	3	TRPC1	protein_coding	4324	transient receptor potential cation channel subfamily C member 1 [Source:HGNC Symbol;Acc:HGNC:12333]	7220	P48995	P48995
0.271995	4.56923	3.1811	0.00470371	0.220165	ENSG00000111331.12	FALSE	ENSG00000111331	12	OAS3	protein_coding	6719	2'-5'-oligoadenylate synthetase 3 [Source:HGNC Symbol;Acc:HGNC:8088]	4940	Q9Y6K5	Q9Y6K5
0.258845	3.18241	3.1807	0.00470804	0.220165	ENSG00000138376.10	FALSE	ENSG00000138376	2	BARD1	protein_coding	5499	BRCA1 associated RING domain 1 [Source:HGNC Symbol;Acc:HGNC:952]	580	A0AVN2	A0AVN2
-0.159383	9.75502	-3.17983	0.00471734	0.220165	ENSG00000115053.15	FALSE	ENSG00000115053	2	NCL	protein_coding	4034	nucleolin [Source:HGNC Symbol;Acc:HGNC:7667]	4691	A0A024R4A0	A0A024R4A0
-0.30282	3.89524	-3.17647	0.0047536	0.221068	ENSG00000130159.13	FALSE	ENSG00000130159	19	ECSIT	protein_coding	1700	ECSIT signalling integrator [Source:HGNC Symbol;Acc:HGNC:29548]	51295	Q9BQ95	Q9BQ95
-0.160741	5.68499	-3.17418	0.0047785	0.221372	ENSG00000100461.17	FALSE	ENSG00000100461	14	RBM23	protein_coding	10040	RNA binding motif protein 23 [Source:HGNC Symbol;Acc:HGNC:20155]	55147	A0A0S2Z5D9	A0A0S2Z5D9
0.333837	5.76867	3.17236	0.00479833	0.221372	ENSG00000132646.10	FALSE	ENSG00000132646	20	PCNA	protein_coding	1359	proliferating cell nuclear antigen [Source:HGNC Symbol;Acc:HGNC:8729]	5111	P12004	P12004
0.658825	1.60908	3.1712	0.00481096	0.221372	ENSG00000074527.11	FALSE	ENSG00000074527	12	NTN4	protein_coding	3615	netrin 4 [Source:HGNC Symbol;Acc:HGNC:13658]	59277	A8K3H6	A8K3H6
0.305985	4.52344	3.16709	0.00485623	0.22211	ENSG00000188486.3	FALSE	ENSG00000188486	11	H2AFX	protein_coding	1614	H2A histone family member X [Source:HGNC Symbol;Acc:HGNC:4739]	3014	P16104	P16104
-0.236464	4.70071	-3.16642	0.0048636	0.22211	ENSG00000167965.17	FALSE	ENSG00000167965	16	MLST8	protein_coding	2116	MTOR associated protein, LST8 homolog [Source:HGNC Symbol;Acc:HGNC:24825]	64223	Q9BVC4	Q9BVC4
-0.369843	2.97019	-3.16512	0.00487798	0.22211	ENSG00000135480.15	FALSE	ENSG00000135480	12	KRT7	protein_coding	1754	keratin 7 [Source:HGNC Symbol;Acc:HGNC:6445]	3855	P08729	P08729
0.179696	6.43668	3.16072	0.00492711	0.223567	ENSG00000197323.11	FALSE	ENSG00000197323	1	TRIM33	protein_coding	8339	tripartite motif containing 33 [Source:HGNC Symbol;Acc:HGNC:16290]	51592	B3KN30	B3KN30
-0.819194	0.334378	-3.15147	0.00503182	0.2274	ENSG00000135773.12	FALSE	ENSG00000135773	1	CAPN9	protein_coding	2484	calpain 9 [Source:HGNC Symbol;Acc:HGNC:1486]	10753	B4DNR4	B4DNR4
0.569927	3.12242	3.1502	0.00504638	0.2274	ENSG00000174371.16	FALSE	ENSG00000174371	1	EXO1	protein_coding	3473	exonuclease 1 [Source:HGNC Symbol;Acc:HGNC:3511]	9156	A8K5H6	A8K5H6
0.653559	2.5584	3.14773	0.00507478	0.227894	ENSG00000154065.16	FALSE	ENSG00000154065	18	ANKRD29	protein_coding	3597	ankyrin repeat domain 29 [Source:HGNC Symbol;Acc:HGNC:27110]	147463	Q8N6D5	Q8N6D5
0.419414	2.68164	3.13829	0.00518482	0.231629	ENSG00000106004.4	FALSE	ENSG00000106004	7	HOXA5	protein_coding	1657	homeobox A5 [Source:HGNC Symbol;Acc:HGNC:5106]	3202	P20719	P20719
-0.183382	4.5649	-3.13703	0.00519974	0.231629	ENSG00000167778.8	FALSE	ENSG00000167778	12	SPRYD3	protein_coding	2932	SPRY domain containing 3 [Source:HGNC Symbol;Acc:HGNC:25920]	84926	A0A024RAX4	A0A024RAX4
-0.252202	5.86978	-3.13544	0.00521849	0.231629	ENSG00000168209.4	FALSE	ENSG00000168209	10	DDIT4	protein_coding	1748	DNA damage inducible transcript 4 [Source:HGNC Symbol;Acc:HGNC:24944]	54541	A0A024QZQ6	A0A024QZQ6
0.25182	4.24109	3.12809	0.00530641	0.231629	ENSG00000171314.8	FALSE	ENSG00000171314	10	PGAM1	protein_coding	1830	phosphoglycerate mutase 1 [Source:HGNC Symbol;Acc:HGNC:8888]	5223	B7Z9E5	B7Z9E5
-0.184803	5.40716	-3.12785	0.00530926	0.231629	ENSG00000127884.4	FALSE	ENSG00000127884	10	ECHS1	protein_coding	1617	enoyl-CoA hydratase, short chain 1 [Source:HGNC Symbol;Acc:HGNC:3151]	1892	P30084	P30084
-0.228352	4.91362	-3.12663	0.00532394	0.231629	ENSG00000074071.14	FALSE	ENSG00000074071	16	MRPS34	protein_coding	1040	mitochondrial ribosomal protein S34 [Source:HGNC Symbol;Acc:HGNC:16618]	65993	C9JJ19	C9JJ19
0.201751	6.19841	3.12469	0.00534744	0.231629	ENSG00000105939.12	FALSE	ENSG00000105939	7	ZC3HAV1	protein_coding	7100	zinc finger CCCH-type containing, antiviral 1 [Source:HGNC Symbol;Acc:HGNC:23721]	56829	Q7Z2W4	Q7Z2W4
0.205296	5.00967	3.11805	0.00542871	0.231629	ENSG00000068305.17	FALSE	ENSG00000068305	15	MEF2A	protein_coding	5824	myocyte enhancer factor 2A [Source:HGNC Symbol;Acc:HGNC:6993]	4205	A0A0S2Z417	A0A0S2Z417
0.177475	5.53684	3.11721	0.00543904	0.231629	ENSG00000152223.13	FALSE	ENSG00000152223	18	EPG5	protein_coding	12698	ectopic P-granules autophagy protein 5 homolog [Source:HGNC Symbol;Acc:HGNC:29331]	57724	Q9BTI0	Q9BTI0
-0.197854	6.17561	-3.11702	0.00544131	0.231629	ENSG00000172164.14	FALSE	ENSG00000172164	8	SNTB1	protein_coding	5164	syntrophin beta 1 [Source:HGNC Symbol;Acc:HGNC:11168]	6641	Q13884	Q13884
0.386149	2.22672	3.11321	0.00548854	0.231629	ENSG00000172361.5	FALSE	ENSG00000172361	18	CFAP53	protein_coding	1851	cilia and flagella associated protein 53 [Source:HGNC Symbol;Acc:HGNC:26530]	220136	Q96M91	Q96M91
-0.231939	4.20172	-3.11259	0.00549627	0.231629	ENSG00000141994.15	FALSE	ENSG00000141994	19	DUS3L	protein_coding	2301	dihydrouridine synthase 3 like [Source:HGNC Symbol;Acc:HGNC:26920]	56931	Q96G46	Q96G46
-1.00924	-0.164279	-3.1119	0.00550494	0.231629	ENSG00000129038.15	FALSE	ENSG00000129038	15	LOXL1	protein_coding	2786	lysyl oxidase like 1 [Source:HGNC Symbol;Acc:HGNC:6665]	4016	Q08397	Q08397
-0.27787	5.10514	-3.11111	0.00551483	0.231629	ENSG00000276966.2	FALSE	ENSG00000276966	6	HIST1H4E	protein_coding	1487	histone cluster 1 H4 family member e [Source:HGNC Symbol;Acc:HGNC:4790]	8367	B2R4R0	B2R4R0
-0.251959	3.95257	-3.11097	0.00551656	0.231629	ENSG00000166347.18	FALSE	ENSG00000166347	18	CYB5A	protein_coding	5913	cytochrome b5 type A [Source:HGNC Symbol;Acc:HGNC:2570]	1528	P00167	P00167
0.220031	4.13581	3.10677	0.00556939	0.231629	ENSG00000087095.12	FALSE	ENSG00000087095	17	NLK	protein_coding	4047	nemo like kinase [Source:HGNC Symbol;Acc:HGNC:29858]	51701	A0A024QZ12	A0A024QZ12
0.249587	5.66195	3.10654	0.0055723	0.231629	ENSG00000122966.15	FALSE	ENSG00000122966	12	CIT	protein_coding	8708	citron rho-interacting serine/threonine kinase [Source:HGNC Symbol;Acc:HGNC:1985]	11113	O14578	O14578
0.201478	6.31809	3.10595	0.00557972	0.231629	ENSG00000135862.5	FALSE	ENSG00000135862	1	LAMC1	protein_coding	7889	laminin subunit gamma 1 [Source:HGNC Symbol;Acc:HGNC:6492]	3915	P11047	P11047
0.516639	2.19019	3.10568	0.00558314	0.231629	ENSG00000054598.7	FALSE	ENSG00000054598	6	FOXC1	protein_coding	3926	forkhead box C1 [Source:HGNC Symbol;Acc:HGNC:3800]	2296	Q12948	Q12948
0.248243	3.5948	3.105	0.00559178	0.231629	ENSG00000128683.13	FALSE	ENSG00000128683	2	GAD1	protein_coding	3988	glutamate decarboxylase 1 [Source:HGNC Symbol;Acc:HGNC:4092]	2571	A0A0S2Z3V5	A0A0S2Z3V5
-1.1516	-1.75421	-3.10484	0.00559378	0.231629	ENSG00000260314.2	FALSE	ENSG00000260314	10	MRC1	protein_coding	5198	mannose receptor C-type 1 [Source:HGNC Symbol;Acc:HGNC:7228]	4360	P22897	P22897
0.207385	4.55829	3.10382	0.00560664	0.231629	ENSG00000153094.22	FALSE	ENSG00000153094	2	BCL2L11	protein_coding	5231	BCL2 like 11 [Source:HGNC Symbol;Acc:HGNC:994]	10018	O43521	O43521
-0.143905	6.24485	-3.10332	0.005613	0.231629	ENSG00000082781.11	FALSE	ENSG00000082781	3	ITGB5	protein_coding	4372	integrin subunit beta 5 [Source:HGNC Symbol;Acc:HGNC:6160]	3693	L7RT22	L7RT22
-0.239734	5.78869	-3.10251	0.00562341	0.231629	ENSG00000148296.6	FALSE	ENSG00000148296	9	SURF6	protein_coding	4447	surfeit 6 [Source:HGNC Symbol;Acc:HGNC:11478]	6838	O75683	O75683
-0.300792	4.01542	-3.09913	0.00566656	0.231629	ENSG00000179241.12	FALSE	ENSG00000179241	11	LDLRAD3	protein_coding	3798	low density lipoprotein receptor class A domain containing 3 [Source:HGNC Symbol;Acc:HGNC:27046]	143458	Q86YD5	Q86YD5
-0.222295	9.69749	-3.09881	0.00567073	0.231629	ENSG00000127022.14	FALSE	ENSG00000127022	5	CANX	protein_coding	4260	calnexin [Source:HGNC Symbol;Acc:HGNC:1473]	821	P27824	P27824
0.151326	5.62533	3.09738	0.0056891	0.231629	ENSG00000125834.12	FALSE	ENSG00000125834	20	STK35	protein_coding	6685	serine/threonine kinase 35 [Source:HGNC Symbol;Acc:HGNC:16254]	140901	Q8TDR2	Q8TDR2
-0.448169	4.02681	-3.09731	0.00569008	0.231629	ENSG00000124575.6	FALSE	ENSG00000124575	6	HIST1H1D	protein_coding	666	histone cluster 1 H1 family member d [Source:HGNC Symbol;Acc:HGNC:4717]	3007	P16402	P16402
0.200978	5.15916	3.09656	0.00569967	0.231629	ENSG00000182551.13	FALSE	ENSG00000182551	2	ADI1	protein_coding	3870	acireductone dioxygenase 1 [Source:HGNC Symbol;Acc:HGNC:30576]	55256	Q9BV57	Q9BV57
0.233482	4.67236	3.09508	0.00571884	0.231629	ENSG00000153291.15	FALSE	ENSG00000153291	6	SLC25A27	protein_coding	2963	solute carrier family 25 member 27 [Source:HGNC Symbol;Acc:HGNC:21065]	9481	B4DHR4	B4DHR4
-0.321289	3.85687	-3.09494	0.00572059	0.231629	ENSG00000138375.12	FALSE	ENSG00000138375	2	SMARCAL1	protein_coding	3271	SWI/SNF related, matrix associated, actin dependent regulator of chromatin, subfamily a like 1 [Source:HGNC Symbol;Acc:HGNC:11102]	50485	Q9NZC9	Q9NZC9
-0.256325	7.0235	-3.09364	0.00573758	0.231629	ENSG00000143870.12	FALSE	ENSG00000143870	2	PDIA6	protein_coding	2682	protein disulfide isomerase family A member 6 [Source:HGNC Symbol;Acc:HGNC:30168]	10130	Q15084	Q15084
-1.12329	-1.5367	-3.09323	0.00574286	0.231629	ENSG00000188257.11	FALSE	ENSG00000188257	1	PLA2G2A	protein_coding	1306	phospholipase A2 group IIA [Source:HGNC Symbol;Acc:HGNC:9031]	5320	A0A024RA96	A0A024RA96
0.175591	4.44533	3.0897	0.00578897	0.23213	ENSG00000164975.15	FALSE	ENSG00000164975	9	SNAPC3	protein_coding	5680	small nuclear RNA activating complex polypeptide 3 [Source:HGNC Symbol;Acc:HGNC:11136]	6619	Q92966	Q92966
0.692203	-0.232308	3.08956	0.00579082	0.23213	ENSG00000175894.16	FALSE	ENSG00000175894	21	TSPEAR	protein_coding	3967	thrombospondin type laminin G domain and EAR repeats [Source:HGNC Symbol;Acc:HGNC:1268]	54084	A0A087WZ72	A0A087WZ72
-0.197875	6.85143	-3.08783	0.00581355	0.232256	ENSG00000082641.15	FALSE	ENSG00000082641	17	NFE2L1	protein_coding	4774	nuclear factor, erythroid 2 like 1 [Source:HGNC Symbol;Acc:HGNC:7781]	4779	J9JIE5	J9JIE5
-0.317961	4.34377	-3.08559	0.00584308	0.232256	ENSG00000167797.7	FALSE	ENSG00000167797	11	CDK2AP2	protein_coding	1692	cyclin dependent kinase 2 associated protein 2 [Source:HGNC Symbol;Acc:HGNC:30833]	10263	O75956	O75956
-0.153093	5.06338	-3.08527	0.00584728	0.232256	ENSG00000156709.13	FALSE	ENSG00000156709	X	AIFM1	protein_coding	2468	apoptosis inducing factor mitochondria associated 1 [Source:HGNC Symbol;Acc:HGNC:8768]	9131	E9PMA0	E9PMA0
-0.155498	6.5866	-3.08308	0.00587641	0.232706	ENSG00000160752.14	FALSE	ENSG00000160752	1	FDPS	protein_coding	2017	farnesyl diphosphate synthase [Source:HGNC Symbol;Acc:HGNC:3631]	2224	P14324	P14324
-1.02277	0.212975	-3.08045	0.0059114	0.232993	ENSG00000213420.7	FALSE	ENSG00000213420	7	GPC2	protein_coding	2532	glypican 2 [Source:HGNC Symbol;Acc:HGNC:4450]	221914	Q8N158	Q8N158
-0.459127	2.35244	-3.07986	0.00591931	0.232993	ENSG00000106538.9	FALSE	ENSG00000106538	7	RARRES2	protein_coding	1907	retinoic acid receptor responder 2 [Source:HGNC Symbol;Acc:HGNC:9868]	5919	A0A090N7U9	A0A090N7U9
0.453537	2.28411	3.07629	0.00596736	0.233804	ENSG00000102781.13	FALSE	ENSG00000102781	13	KATNAL1	protein_coding	7551	katanin catalytic subunit A1 like 1 [Source:HGNC Symbol;Acc:HGNC:28361]	84056	A0A024RDP8	A0A024RDP8
0.23815	4.758	3.07567	0.00597571	0.233804	ENSG00000171617.13	FALSE	ENSG00000171617	5	ENC1	protein_coding	5657	ectodermal-neural cortex 1 [Source:HGNC Symbol;Acc:HGNC:3345]	8507	O14682	O14682
0.363379	3.69409	3.07116	0.00603693	0.235494	ENSG00000051341.13	FALSE	ENSG00000051341	3	POLQ	protein_coding	9055	DNA polymerase theta [Source:HGNC Symbol;Acc:HGNC:9186]	10721	O75417	O75417
-0.947171	-0.640733	-3.0629	0.00615075	0.237831	ENSG00000167733.13	FALSE	ENSG00000167733	19	HSD11B1L	protein_coding	1884	hydroxysteroid 11-beta dehydrogenase 1 like [Source:HGNC Symbol;Acc:HGNC:30419]	374875	A0A087WWR3	A0A087WWR3
-0.228738	4.62995	-3.06131	0.00617296	0.237831	ENSG00000137161.16	FALSE	ENSG00000137161	6	CNPY3	protein_coding	1704	canopy FGF signaling regulator 3 [Source:HGNC Symbol;Acc:HGNC:11968]	10695	Q9BT09	Q9BT09
0.384468	3.14226	3.06036	0.00618612	0.237831	ENSG00000133302.12	FALSE	ENSG00000133302	5	SLF1	protein_coding	5905	SMC5-SMC6 complex localization factor 1 [Source:HGNC Symbol;Acc:HGNC:25408]	84250	I6L9F1	I6L9F1
-0.473032	2.22088	-3.05786	0.00622117	0.237831	ENSG00000132837.14	FALSE	ENSG00000132837	5	DMGDH	protein_coding	3106	dimethylglycine dehydrogenase [Source:HGNC Symbol;Acc:HGNC:24475]	29958	B3KQ84	B3KQ84
-0.279225	4.04205	-3.05612	0.00624573	0.237831	ENSG00000250479.8	FALSE	ENSG00000250479	22	CHCHD10	protein_coding	1171	coiled-coil-helix-coiled-coil-helix domain containing 10 [Source:HGNC Symbol;Acc:HGNC:15559]	400916	B5MBW9	B5MBW9
0.373641	4.66456	3.05483	0.00626389	0.237831	ENSG00000047634.14	FALSE	ENSG00000047634	X	SCML1	protein_coding	4615	Scm polycomb group protein like 1 [Source:HGNC Symbol;Acc:HGNC:10580]	6322	A0A024RBY0	A0A024RBY0
1.00668	-0.229323	3.05437	0.0062705	0.237831	ENSG00000112139.15	FALSE	ENSG00000112139	6	MDGA1	protein_coding	10736	MAM domain containing glycosylphosphatidylinositol anchor 1 [Source:HGNC Symbol;Acc:HGNC:19267]	266727	Q8NFP4	Q8NFP4
0.435882	2.98861	3.05332	0.00628533	0.237831	ENSG00000165891.15	FALSE	ENSG00000165891	12	E2F7	protein_coding	5740	E2F transcription factor 7 [Source:HGNC Symbol;Acc:HGNC:23820]	144455	Q96AV8	Q96AV8
-0.336422	4.23844	-3.0532	0.006287	0.237831	ENSG00000142765.17	FALSE	ENSG00000142765	1	SYTL1	protein_coding	2681	synaptotagmin like 1 [Source:HGNC Symbol;Acc:HGNC:15584]	84958	Q8IYJ3	Q8IYJ3
-0.216818	3.46468	-3.0529	0.00629134	0.237831	ENSG00000153885.14	FALSE	ENSG00000153885	19	KCTD15	protein_coding	4918	potassium channel tetramerization domain containing 15 [Source:HGNC Symbol;Acc:HGNC:23297]	79047	Q96SI1	Q96SI1
0.339056	3.35141	3.0525	0.00629703	0.237831	ENSG00000075303.12	FALSE	ENSG00000075303	7	SLC25A40	protein_coding	4045	solute carrier family 25 member 40 [Source:HGNC Symbol;Acc:HGNC:29680]	55972	Q8TBP6	Q8TBP6
0.299796	3.48522	3.05036	0.00632749	0.238293	ENSG00000196584.2	FALSE	ENSG00000196584	7	XRCC2	protein_coding	4728	X-ray repair cross complementing 2 [Source:HGNC Symbol;Acc:HGNC:12829]	7516	O43543	O43543
0.26716	5.28348	3.04561	0.0063957	0.239582	ENSG00000105329.9	FALSE	ENSG00000105329	19	TGFB1	protein_coding	2769	transforming growth factor beta 1 [Source:HGNC Symbol;Acc:HGNC:11766]	7040	P01137	P01137
-0.175187	9.16789	-3.04424	0.00641559	0.239582	ENSG00000171345.13	FALSE	ENSG00000171345	17	KRT19	protein_coding	1390	keratin 19 [Source:HGNC Symbol;Acc:HGNC:6436]	3880	P08727	P08727
0.393819	3.72982	3.04416	0.00641673	0.239582	ENSG00000085563.14	FALSE	ENSG00000085563	7	ABCB1	protein_coding	4778	ATP binding cassette subfamily B member 1 [Source:HGNC Symbol;Acc:HGNC:40]	5243	A4D1D2	A4D1D2
-0.366084	3.28547	-3.04154	0.00645476	0.240316	ENSG00000132763.14	FALSE	ENSG00000132763	1	MMACHC	protein_coding	5296	metabolism of cobalamin associated C [Source:HGNC Symbol;Acc:HGNC:24525]	25974	A0A0C4DGU2	A0A0C4DGU2
0.225824	4.5884	3.03722	0.00651789	0.240732	ENSG00000174606.13	FALSE	ENSG00000174606	1	ANGEL2	protein_coding	4649	angel homolog 2 [Source:HGNC Symbol;Acc:HGNC:30534]	90806	B7Z297	B7Z297
0.219191	4.33515	3.0367	0.00652564	0.240732	ENSG00000161904.11	FALSE	ENSG00000161904	6	LEMD2	protein_coding	4870	LEM domain containing 2 [Source:HGNC Symbol;Acc:HGNC:21244]	221496	Q8NC56	Q8NC56
0.418627	2.72156	3.03611	0.00653424	0.240732	ENSG00000077152.10	FALSE	ENSG00000077152	1	UBE2T	protein_coding	1499	ubiquitin conjugating enzyme E2 T [Source:HGNC Symbol;Acc:HGNC:25009]	29089	Q9NPD8	Q9NPD8
-0.231544	6.60814	-3.03573	0.00653997	0.240732	ENSG00000108561.8	FALSE	ENSG00000108561	17	C1QBP	protein_coding	1169	complement C1q binding protein [Source:HGNC Symbol;Acc:HGNC:1243]	708	Q07021	Q07021
-0.193798	4.57729	-3.03315	0.00657805	0.240732	ENSG00000136718.9	FALSE	ENSG00000136718	2	IMP4	protein_coding	2379	IMP4, U3 small nucleolar ribonucleoprotein [Source:HGNC Symbol;Acc:HGNC:30856]	92856	Q96G21	Q96G21
0.200329	4.21267	3.03197	0.00659554	0.240732	ENSG00000106692.14	FALSE	ENSG00000106692	9	FKTN	protein_coding	7364	fukutin [Source:HGNC Symbol;Acc:HGNC:3622]	2218	O75072	O75072
0.177382	7.32291	3.03001	0.00662487	0.240732	ENSG00000112851.14	FALSE	ENSG00000112851	5	ERBIN	protein_coding	8647	erbb2 interacting protein [Source:HGNC Symbol;Acc:HGNC:15842]	55914	Q96RT1	Q96RT1
-0.190174	4.79419	-3.02924	0.00663625	0.240732	ENSG00000147155.10	FALSE	ENSG00000147155	X	EBP	protein_coding	1775	EBP, cholestenol delta-isomerase [Source:HGNC Symbol;Acc:HGNC:3133]	10682	A0A024QYX0	A0A024QYX0
0.23828	4.68844	3.02858	0.00664618	0.240732	ENSG00000144320.13	FALSE	ENSG00000144320	2	LNPK	protein_coding	7647	lunapark, ER junction formation factor [Source:HGNC Symbol;Acc:HGNC:21610]	80856	Q9C0E8	Q9C0E8
-0.172386	5.22085	-3.02832	0.00665014	0.240732	ENSG00000105576.15	FALSE	ENSG00000105576	19	TNPO2	protein_coding	5122	transportin 2 [Source:HGNC Symbol;Acc:HGNC:19998]	30000	A0A024R7F7	A0A024R7F7
-0.228555	3.92568	-3.02498	0.00670027	0.241827	ENSG00000277791.4	FALSE	ENSG00000277791	17	PSMB3	protein_coding	773	proteasome subunit beta 3 [Source:HGNC Symbol;Acc:HGNC:9540]	5691	P49720	P49720
0.359634	3.81626	3.0221	0.00674393	0.241827	ENSG00000164823.10	FALSE	ENSG00000164823	8	OSGIN2	protein_coding	4266	oxidative stress induced growth inhibitor family member 2 [Source:HGNC Symbol;Acc:HGNC:1355]	734	Q9Y236	Q9Y236
-0.23214	4.19391	-3.02146	0.00675374	0.241827	ENSG00000105559.11	FALSE	ENSG00000105559	19	PLEKHA4	protein_coding	3088	pleckstrin homology domain containing A4 [Source:HGNC Symbol;Acc:HGNC:14339]	57664	Q9H4M7	Q9H4M7
-0.175927	6.96897	-3.02141	0.00675442	0.241827	ENSG00000167553.15	FALSE	ENSG00000167553	12	TUBA1C	protein_coding	3001	tubulin alpha 1c [Source:HGNC Symbol;Acc:HGNC:20768]	84790	B7Z1K5	B7Z1K5
-0.162321	6.65216	-3.01947	0.00678406	0.242224	ENSG00000197879.16	FALSE	ENSG00000197879	17	MYO1C	protein_coding	5057	myosin IC [Source:HGNC Symbol;Acc:HGNC:7597]	4641	O00159	O00159
-0.138214	7.49201	-3.01737	0.00681616	0.242534	ENSG00000136938.8	FALSE	ENSG00000136938	9	ANP32B	protein_coding	1463	acidic nuclear phosphoprotein 32 family member B [Source:HGNC Symbol;Acc:HGNC:16677]	10541	Q92688	Q92688
0.242511	2.86966	3.01605	0.00683658	0.242534	ENSG00000170634.12	FALSE	ENSG00000170634	2	ACYP2	protein_coding	1913	acylphosphatase 2 [Source:HGNC Symbol;Acc:HGNC:180]	98	U3KQL2	U3KQL2
-0.345555	4.18936	-3.01463	0.00685841	0.242534	ENSG00000162542.13	FALSE	ENSG00000162542	1	TMCO4	protein_coding	2974	transmembrane and coiled-coil domains 4 [Source:HGNC Symbol;Acc:HGNC:27393]	255104	Q5TGY1	Q5TGY1
0.257627	4.86831	3.01408	0.00686696	0.242534	ENSG00000048405.9	FALSE	ENSG00000048405	7	ZNF800	protein_coding	4358	zinc finger protein 800 [Source:HGNC Symbol;Acc:HGNC:27267]	168850	Q2TB10	Q2TB10
0.334023	3.34365	3.00999	0.00693036	0.243415	ENSG00000167513.8	FALSE	ENSG00000167513	16	CDT1	protein_coding	3240	chromatin licensing and DNA replication factor 1 [Source:HGNC Symbol;Acc:HGNC:24576]	81620	Q9H211	Q9H211
0.362291	4.62112	3.00814	0.00695938	0.243415	ENSG00000092853.13	FALSE	ENSG00000092853	1	CLSPN	protein_coding	4769	claspin [Source:HGNC Symbol;Acc:HGNC:19715]	63967	Q9HAW4	Q9HAW4
-0.32552	4.10782	-3.00759	0.00696794	0.243415	ENSG00000163389.11	FALSE	ENSG00000163389	3	POGLUT1	protein_coding	3598	protein O-glucosyltransferase 1 [Source:HGNC Symbol;Acc:HGNC:22954]	56983	Q8NBL1	Q8NBL1
0.858626	-0.87886	3.00649	0.00698527	0.243415	ENSG00000184058.14	FALSE	ENSG00000184058	22	TBX1	protein_coding	2084	T-box 1 [Source:HGNC Symbol;Acc:HGNC:11592]	6899	O43435	O43435
0.170723	6.02243	3.00533	0.00700348	0.243415	ENSG00000168411.13	FALSE	ENSG00000168411	16	RFWD3	protein_coding	4957	ring finger and WD repeat domain 3 [Source:HGNC Symbol;Acc:HGNC:25539]	55159	Q6PCD5	Q6PCD5
-0.207298	4.58104	-3.00532	0.00700368	0.243415	ENSG00000187778.13	FALSE	ENSG00000187778	12	MCRS1	protein_coding	2450	microspherule protein 1 [Source:HGNC Symbol;Acc:HGNC:6960]	10445	Q96EZ8	Q96EZ8
0.445121	2.58239	3.00379	0.00702773	0.243603	ENSG00000197044.10	FALSE	ENSG00000197044	19	ZNF441	protein_coding	4356	zinc finger protein 441 [Source:HGNC Symbol;Acc:HGNC:20875]	126068	Q8N8Z8	Q8N8Z8
-0.143408	6.91628	-3.00101	0.00707198	0.244379	ENSG00000122359.17	FALSE	ENSG00000122359	10	ANXA11	protein_coding	6965	annexin A11 [Source:HGNC Symbol;Acc:HGNC:535]	311	P50995	P50995
0.331494	2.59693	2.99925	0.0070999	0.244379	ENSG00000135622.12	FALSE	ENSG00000135622	2	SEMA4F	protein_coding	6007	ssemaphorin 4F [Source:HGNC Symbol;Acc:HGNC:10734]	10505	O95754	O95754
-0.180076	4.86008	-2.99809	0.00711849	0.244379	ENSG00000148110.15	FALSE	ENSG00000148110	9	MFSD14B	protein_coding	3420	major facilitator superfamily domain containing 14B [Source:HGNC Symbol;Acc:HGNC:23376]	84641	Q5SR56	Q5SR56
0.237008	4.09494	2.99769	0.00712493	0.244379	ENSG00000102931.7	FALSE	ENSG00000102931	16	ARL2BP	protein_coding	2130	ADP ribosylation factor like GTPase 2 binding protein [Source:HGNC Symbol;Acc:HGNC:17146]	23568	A0A024R6U9	A0A024R6U9
0.23003	4.18312	2.99539	0.00716189	0.245004	ENSG00000144228.8	FALSE	ENSG00000144228	2	SPOPL	protein_coding	6025	speckle type BTB/POZ protein like [Source:HGNC Symbol;Acc:HGNC:27934]	339745	Q6IQ16	Q6IQ16
0.373094	5.27246	2.99404	0.00718362	0.245106	ENSG00000137563.11	FALSE	ENSG00000137563	8	GGH	protein_coding	1607	gamma-glutamyl hydrolase [Source:HGNC Symbol;Acc:HGNC:4248]	8836	Q92820	Q92820
-0.170035	5.54501	-2.98966	0.0072547	0.246553	ENSG00000133422.12	FALSE	ENSG00000133422	22	MORC2	protein_coding	5181	MORC family CW-type zinc finger 2 [Source:HGNC Symbol;Acc:HGNC:23573]	22880	Q9Y6X9	Q9Y6X9
-0.849414	0.484306	-2.98824	0.00727797	0.246553	ENSG00000064787.13	FALSE	ENSG00000064787	20	BCAS1	protein_coding	6112	breast carcinoma amplified sequence 1 [Source:HGNC Symbol;Acc:HGNC:974]	8537	B2RCQ5	B2RCQ5
0.246119	4.21158	2.98795	0.00728263	0.246553	ENSG00000057757.9	FALSE	ENSG00000057757	1	PITHD1	protein_coding	1603	PITH domain containing 1 [Source:HGNC Symbol;Acc:HGNC:25022]	57095	Q9GZP4	Q9GZP4
-0.505956	2.28475	-2.98537	0.00732496	0.247345	ENSG00000069812.11	FALSE	ENSG00000069812	1	HES2	protein_coding	4262	hes family bHLH transcription factor 2 [Source:HGNC Symbol;Acc:HGNC:16005]	54626	Q9Y543	Q9Y543
-0.209454	5.62532	-2.97989	0.00741568	0.249763	ENSG00000166123.13	FALSE	ENSG00000166123	16	GPT2	protein_coding	4228	glutamic--pyruvic transaminase 2 [Source:HGNC Symbol;Acc:HGNC:18062]	84706	Q8TD30	Q8TD30
0.18982	6.44092	2.97792	0.00744866	0.250229	ENSG00000086015.20	FALSE	ENSG00000086015	1	MAST2	protein_coding	5738	microtubule associated serine/threonine kinase 2 [Source:HGNC Symbol;Acc:HGNC:19035]	23139	Q6P0Q8	Q6P0Q8
-0.187255	4.48458	-2.97671	0.0074689	0.250266	ENSG00000197043.13	FALSE	ENSG00000197043	5	ANXA6	protein_coding	2593	annexin A6 [Source:HGNC Symbol;Acc:HGNC:544]	309	A0A0S2Z2Z6	A0A0S2Z2Z6
-0.252759	5.02413	-2.96899	0.00759947	0.25399	ENSG00000144867.11	FALSE	ENSG00000144867	3	SRPRB	protein_coding	2827	SRP receptor subunit beta [Source:HGNC Symbol;Acc:HGNC:24085]	58477	Q549N5	Q549N5
0.285306	2.59453	2.96669	0.00763863	0.254647	ENSG00000136720.6	FALSE	ENSG00000136720	2	HS6ST1	protein_coding	3932	heparan sulfate 6-O-sulfotransferase 1 [Source:HGNC Symbol;Acc:HGNC:5201]	9394	O60243	O60243
-0.303777	3.71691	-2.96127	0.00773214	0.256293	ENSG00000140044.12	FALSE	ENSG00000140044	14	JDP2	protein_coding	5401	Jun dimerization protein 2 [Source:HGNC Symbol;Acc:HGNC:17546]	122953	A0A024R6D7	A0A024R6D7
-0.455172	2.47998	-2.96092	0.00773816	0.256293	ENSG00000116661.10	FALSE	ENSG00000116661	1	FBXO2	protein_coding	2215	F-box protein 2 [Source:HGNC Symbol;Acc:HGNC:13581]	26232	Q9UK22	Q9UK22
0.299918	2.74638	2.95987	0.00775636	0.256293	ENSG00000164045.11	FALSE	ENSG00000164045	3	CDC25A	protein_coding	3783	cell division cycle 25A [Source:HGNC Symbol;Acc:HGNC:1725]	993	A0A024R2S4	A0A024R2S4
-0.182907	7.53427	-2.9593	0.00776644	0.256293	ENSG00000145555.14	FALSE	ENSG00000145555	5	MYO10	protein_coding	11456	myosin X [Source:HGNC Symbol;Acc:HGNC:7593]	4651	Q9HD67	Q9HD67
0.343653	3.89167	2.95757	0.00779653	0.256638	ENSG00000249115.8	FALSE	ENSG00000249115	19	HAUS5	protein_coding	4462	HAUS augmin like complex subunit 5 [Source:HGNC Symbol;Acc:HGNC:29130]	23354	O94927	O94927
-0.83159	1.79005	-2.95596	0.00782474	0.256919	ENSG00000088002.11	FALSE	ENSG00000088002	19	SULT2B1	protein_coding	1447	sulfotransferase family 2B member 1 [Source:HGNC Symbol;Acc:HGNC:11459]	6820	O00204	O00204
-0.150565	7.04455	-2.95441	0.00785201	0.257045	ENSG00000181789.14	FALSE	ENSG00000181789	3	COPG1	protein_coding	3231	coatomer protein complex subunit gamma 1 [Source:HGNC Symbol;Acc:HGNC:2236]	22820	Q9Y678	Q9Y678
-0.227137	6.25577	-2.9535	0.00786792	0.257045	ENSG00000078808.16	FALSE	ENSG00000078808	1	SDF4	protein_coding	3516	stromal cell derived factor 4 [Source:HGNC Symbol;Acc:HGNC:24188]	51150	A0A024R084	A0A024R084
0.354128	3.6258	2.94887	0.00795001	0.258834	ENSG00000178127.12	FALSE	ENSG00000178127	18	NDUFV2	protein_coding	942	NADH:ubiquinone oxidoreductase core subunit V2 [Source:HGNC Symbol;Acc:HGNC:7717]	4729	P19404	P19404
-0.151028	7.17531	-2.94818	0.00796229	0.258834	ENSG00000132507.17	FALSE	ENSG00000132507	17	EIF5A	protein_coding	1511	eukaryotic translation initiation factor 5A [Source:HGNC Symbol;Acc:HGNC:3300]	1984	P63241	P63241
-0.279969	2.94176	-2.94168	0.00807904	0.261064	ENSG00000136840.18	FALSE	ENSG00000136840	9	ST6GALNAC4	protein_coding	1691	ST6 N-acetylgalactosaminide alpha-2,6-sialyltransferase 4 [Source:HGNC Symbol;Acc:HGNC:17846]	27090	A0A024R881	A0A024R881
-0.329418	2.65198	-2.9405	0.00810044	0.261064	ENSG00000080031.9	FALSE	ENSG00000080031	19	PTPRH	protein_coding	3877	protein tyrosine phosphatase, receptor type H [Source:HGNC Symbol;Acc:HGNC:9672]	5794	#N/A	#N/A
0.228589	4.30957	2.93558	0.00819006	0.261064	ENSG00000135127.11	FALSE	ENSG00000135127	12	BICDL1	protein_coding	3055	BICD family like cargo adaptor 1 [Source:HGNC Symbol;Acc:HGNC:28095]	92558	Q6ZP65	Q6ZP65
-0.178338	5.67812	-2.93467	0.0082069	0.261064	ENSG00000108389.9	FALSE	ENSG00000108389	17	MTMR4	protein_coding	5839	myotubularin related protein 4 [Source:HGNC Symbol;Acc:HGNC:7452]	9110	Q9NYA4	Q9NYA4
-0.141304	9.87565	-2.93301	0.00823742	0.261064	ENSG00000063046.17	FALSE	ENSG00000063046	12	EIF4B	protein_coding	4148	eukaryotic translation initiation factor 4B [Source:HGNC Symbol;Acc:HGNC:3285]	1975	B4DRM3	B4DRM3
-0.250561	4.20566	-2.93265	0.00824406	0.261064	ENSG00000204304.11	FALSE	ENSG00000204304	6	PBX2	protein_coding	3205	PBX homeobox 2 [Source:HGNC Symbol;Acc:HGNC:8633]	5089	A0A024RCR3	A0A024RCR3
-0.153667	5.37028	-2.93131	0.00826873	0.261064	ENSG00000127824.13	FALSE	ENSG00000127824	2	TUBA4A	protein_coding	2499	tubulin alpha 4a [Source:HGNC Symbol;Acc:HGNC:12407]	7277	P68366	P68366
-0.25853	3.78769	-2.93087	0.00827694	0.261064	ENSG00000106948.16	FALSE	ENSG00000106948	9	AKNA	protein_coding	7380	AT-hook transcription factor [Source:HGNC Symbol;Acc:HGNC:24108]	80709	Q64FY1	Q64FY1
-0.141116	7.48286	-2.93077	0.0082788	0.261064	ENSG00000141101.12	FALSE	ENSG00000141101	16	NOB1	protein_coding	1734	NIN1 _RPN12_ binding protein 1 homolog [Source:HGNC Symbol;Acc:HGNC:29540]	28987	Q9ULX3	Q9ULX3
-0.218912	3.92936	-2.92996	0.00829385	0.261064	ENSG00000128891.15	FALSE	ENSG00000128891	15	CCDC32	protein_coding	6131	coiled-coil domain containing 32 [Source:HGNC Symbol;Acc:HGNC:28295]	90416	Q9BV29	Q9BV29
-0.173817	5.31448	-2.9294	0.00830409	0.261064	ENSG00000115207.13	FALSE	ENSG00000115207	2	GTF3C2	protein_coding	3992	general transcription factor IIIC subunit 2 [Source:HGNC Symbol;Acc:HGNC:4665]	2976	Q8WUA4	Q8WUA4
-0.331344	4.98565	-2.92887	0.00831401	0.261064	ENSG00000100889.11	FALSE	ENSG00000100889	14	PCK2	protein_coding	2505	phosphoenolpyruvate carboxykinase 2, mitochondrial [Source:HGNC Symbol;Acc:HGNC:8725]	5106	A0A0A0MS74	A0A0A0MS74
-0.198079	4.62171	-2.92853	0.00832036	0.261064	ENSG00000111906.17	FALSE	ENSG00000111906	6	HDDC2	protein_coding	3529	HD domain containing 2 [Source:HGNC Symbol;Acc:HGNC:21078]	51020	A0A140VJK7	A0A140VJK7
-0.189711	11.7231	-2.92806	0.008329	0.261064	ENSG00000170421.12	FALSE	ENSG00000170421	12	KRT8	protein_coding	2862	keratin 8 [Source:HGNC Symbol;Acc:HGNC:6446]	3856	Q7L4M3	Q7L4M3
-0.305744	3.81359	-2.92543	0.00837813	0.261064	ENSG00000188959.9	FALSE	ENSG00000188959	9	C9ORF152	protein_coding	2717	chromosome 9 open reading frame 152 [Source:HGNC Symbol;Acc:HGNC:31455]	401546	A8K2L3	A8K2L3
-0.147482	8.09033	-2.92541	0.00837854	0.261064	ENSG00000105281.12	FALSE	ENSG00000105281	19	SLC1A5	protein_coding	2882	solute carrier family 1 member 5 [Source:HGNC Symbol;Acc:HGNC:10943]	6510	Q15758	Q15758
-0.232945	5.30323	-2.92533	0.00838	0.261064	ENSG00000117984.13	FALSE	ENSG00000117984	11	CTSD	protein_coding	2123	cathepsin D [Source:HGNC Symbol;Acc:HGNC:2529]	1509	P07339	P07339
-0.315438	4.35548	-2.92258	0.00843179	0.261064	ENSG00000197122.11	FALSE	ENSG00000197122	20	SRC	protein_coding	4630	SRC proto-oncogene, non-receptor tyrosine kinase [Source:HGNC Symbol;Acc:HGNC:11283]	6714	P12931	P12931
0.237248	4.82421	2.92221	0.00843871	0.261064	ENSG00000148690.11	FALSE	ENSG00000148690	10	FRA10AC1	protein_coding	4780	FRA10A associated CGG repeat 1 [Source:HGNC Symbol;Acc:HGNC:1162]	118924	Q70Z53	Q70Z53
-0.304051	3.30196	-2.92138	0.00845433	0.261064	ENSG00000154813.9	FALSE	ENSG00000154813	3	DPH3	protein_coding	3131	diphthamide biosynthesis 3 [Source:HGNC Symbol;Acc:HGNC:27717]	285381	Q96FX2	Q96FX2
-0.373059	4.96752	-2.92002	0.00848009	0.261064	ENSG00000197061.4	FALSE	ENSG00000197061	6	HIST1H4C	protein_coding	435	histone cluster 1 H4 family member c [Source:HGNC Symbol;Acc:HGNC:4787]	8364	B2R4R0	B2R4R0
-0.173679	5.94229	-2.91942	0.00849145	0.261064	ENSG00000156697.12	FALSE	ENSG00000156697	X	UTP14A	protein_coding	2488	UTP14A, small subunit processome component [Source:HGNC Symbol;Acc:HGNC:10665]	10813	Q9BVJ6	Q9BVJ6
-0.503835	2.49982	-2.91849	0.00850922	0.261064	ENSG00000228300.13	FALSE	ENSG00000228300	19	C19ORF24	protein_coding	1675	chromosome 19 open reading frame 24 [Source:HGNC Symbol;Acc:HGNC:26073]	55009	Q9BVV8	Q9BVV8
-0.274705	3.9217	-2.91714	0.00853483	0.261064	ENSG00000109861.15	FALSE	ENSG00000109861	11	CTSC	protein_coding	6125	cathepsin C [Source:HGNC Symbol;Acc:HGNC:2528]	1075	P53634	P53634
-0.213203	4.57894	-2.91666	0.00854411	0.261064	ENSG00000115234.10	FALSE	ENSG00000115234	2	SNX17	protein_coding	2400	sorting nexin 17 [Source:HGNC Symbol;Acc:HGNC:14979]	9784	B4DTB8	B4DTB8
-0.190981	7.99733	-2.9145	0.00858541	0.261064	ENSG00000105640.12	FALSE	ENSG00000105640	19	RPL18A	protein_coding	1391	ribosomal protein L18a [Source:HGNC Symbol;Acc:HGNC:10311]	6142	Q02543	Q02543
0.969835	-0.821664	2.91402	0.00859459	0.261064	ENSG00000105808.17	FALSE	ENSG00000105808	7	RASA4	protein_coding	5605	RAS p21 protein activator 4 [Source:HGNC Symbol;Acc:HGNC:23181]	10156	O43374	O43374
-0.230873	4.16286	-2.91345	0.00860549	0.261064	ENSG00000141759.14	FALSE	ENSG00000141759	18	TXNL4A	protein_coding	3504	thioredoxin like 4A [Source:HGNC Symbol;Acc:HGNC:30551]	10907	P83876	P83876
-0.364668	3.61941	-2.9132	0.00861025	0.261064	ENSG00000105676.13	FALSE	ENSG00000105676	19	ARMC6	protein_coding	2488	armadillo repeat containing 6 [Source:HGNC Symbol;Acc:HGNC:25049]	93436	Q6NXE6	Q6NXE6
-0.201882	5.50078	-2.91052	0.00866197	0.262025	ENSG00000162298.18	FALSE	ENSG00000162298	11	SYVN1	protein_coding	4547	synoviolin 1 [Source:HGNC Symbol;Acc:HGNC:20738]	84447	Q86TM6	Q86TM6
1.02836	-0.540946	2.90811	0.00870864	0.262828	ENSG00000260007.3	FALSE	ENSG00000260007	15	AC107871.1	protein_coding	3389	novel protein	#N/A	#N/A	#N/A
-0.427247	3.0807	-2.90485	0.00877227	0.263162	ENSG00000117411.16	FALSE	ENSG00000117411	1	B4GALT2	protein_coding	2629	beta-1,4-galactosyltransferase 2 [Source:HGNC Symbol;Acc:HGNC:925]	8704	O60909	O60909
0.429604	2.6058	2.90396	0.00878975	0.263162	ENSG00000165655.16	FALSE	ENSG00000165655	10	ZNF503	protein_coding	3347	zinc finger protein 503 [Source:HGNC Symbol;Acc:HGNC:23589]	84858	Q96F45	Q96F45
-0.274323	3.70619	-2.90345	0.00879979	0.263162	ENSG00000066827.15	FALSE	ENSG00000066827	8	ZFAT	protein_coding	5472	zinc finger and AT-hook domain containing [Source:HGNC Symbol;Acc:HGNC:19899]	57623	Q4KMQ4	Q4KMQ4
-0.296242	4.71647	-2.90343	0.00880026	0.263162	ENSG00000164855.15	FALSE	ENSG00000164855	7	TMEM184A	protein_coding	6276	transmembrane protein 184A [Source:HGNC Symbol;Acc:HGNC:28797]	202915	Q6ZMB5	Q6ZMB5
-0.151712	8.36423	-2.90139	0.00884025	0.263754	ENSG00000104529.17	FALSE	ENSG00000104529	8	EEF1D	protein_coding	3718	eukaryotic translation elongation factor 1 delta [Source:HGNC Symbol;Acc:HGNC:3211]	1936	B2RAR6	B2RAR6
-0.161266	8.21509	-2.89805	0.00890645	0.265124	ENSG00000092964.17	FALSE	ENSG00000092964	8	DPYSL2	protein_coding	4805	dihydropyrimidinase like 2 [Source:HGNC Symbol;Acc:HGNC:3014]	1808	A0A1C7CYX9	A0A1C7CYX9
-0.177597	5.48951	-2.89615	0.00894429	0.265645	ENSG00000131653.12	FALSE	ENSG00000131653	16	TRAF7	protein_coding	3700	TNF receptor associated factor 7 [Source:HGNC Symbol;Acc:HGNC:20456]	84231	B3KQY7	B3KQY7
-0.313002	3.13564	-2.89274	0.00901256	0.266236	ENSG00000065057.7	FALSE	ENSG00000065057	16	NTHL1	protein_coding	1067	nth like DNA glycosylase 1 [Source:HGNC Symbol;Acc:HGNC:8028]	4913	P78549	P78549
-0.283511	3.93039	-2.89258	0.00901566	0.266236	ENSG00000106305.9	FALSE	ENSG00000106305	7	AIMP2	protein_coding	1225	aminoacyl tRNA synthetase complex interacting multifunctional protein 2 [Source:HGNC Symbol;Acc:HGNC:20609]	7965	F8W950	F8W950
0.268227	3.38282	2.89093	0.00904901	0.266236	ENSG00000119878.5	FALSE	ENSG00000119878	2	CRIPT	protein_coding	1953	CXXC repeat containing interactor of PDZ3 domain [Source:HGNC Symbol;Acc:HGNC:14312]	9419	Q9P021	Q9P021
-0.177892	5.87912	-2.8909	0.00904959	0.266236	ENSG00000196975.15	FALSE	ENSG00000196975	2	ANXA4	protein_coding	4418	annexin A4 [Source:HGNC Symbol;Acc:HGNC:542]	307	P09525	P09525
-0.205363	6.79631	-2.88899	0.00908815	0.266236	ENSG00000130707.17	FALSE	ENSG00000130707	9	ASS1	protein_coding	1973	argininosuccinate synthase 1 [Source:HGNC Symbol;Acc:HGNC:758]	445	P00966	P00966
-0.345552	3.64343	-2.8877	0.00911423	0.266236	ENSG00000144589.21	FALSE	ENSG00000144589	2	STK11IP	protein_coding	3615	serine/threonine kinase 11 interacting protein [Source:HGNC Symbol;Acc:HGNC:19184]	114790	C9JQV3	C9JQV3
-0.180014	6.44031	-2.88684	0.00913176	0.266236	ENSG00000106244.12	FALSE	ENSG00000106244	7	PDAP1	protein_coding	2546	PDGFA associated protein 1 [Source:HGNC Symbol;Acc:HGNC:14634]	11333	Q13442	Q13442
0.302079	4.36346	2.88617	0.00914545	0.266236	ENSG00000172922.9	FALSE	ENSG00000172922	11	RNASEH2C	protein_coding	3311	ribonuclease H2 subunit C [Source:HGNC Symbol;Acc:HGNC:24116]	84153	A0A024R5B3	A0A024R5B3
0.315291	2.80452	2.88538	0.00916163	0.266236	ENSG00000113790.10	FALSE	ENSG00000113790	3	EHHADH	protein_coding	3850	enoyl-CoA hydratase and 3-hydroxyacyl CoA dehydrogenase [Source:HGNC Symbol;Acc:HGNC:3247]	1962	Q08426	Q08426
0.270307	5.28461	2.88435	0.00918266	0.266236	ENSG00000069667.15	FALSE	ENSG00000069667	15	RORA	protein_coding	10844	RAR related orphan receptor A [Source:HGNC Symbol;Acc:HGNC:10258]	6095	A0A0C4DFP5	A0A0C4DFP5
-0.280494	3.2698	-2.88407	0.00918829	0.266236	ENSG00000009830.11	FALSE	ENSG00000009830	14	POMT2	protein_coding	5647	protein O-mannosyltransferase 2 [Source:HGNC Symbol;Acc:HGNC:19743]	29954	Q9UKY4	Q9UKY4
0.517946	1.67837	2.87985	0.00927504	0.268155	ENSG00000122591.11	FALSE	ENSG00000122591	7	FAM126A	protein_coding	13177	family with sequence similarity 126 member A [Source:HGNC Symbol;Acc:HGNC:24587]	84668	Q9BYI3	Q9BYI3
-0.24069	3.87806	-2.87724	0.00932915	0.268517	ENSG00000163083.5	FALSE	ENSG00000163083	2	INHBB	protein_coding	3204	inhibin subunit beta B [Source:HGNC Symbol;Acc:HGNC:6067]	3625	P09529	P09529
0.203344	4.10766	2.87598	0.00935525	0.268517	ENSG00000069966.18	FALSE	ENSG00000069966	15	GNB5	protein_coding	8906	G protein subunit beta 5 [Source:HGNC Symbol;Acc:HGNC:4401]	10681	A0A024R5R9	A0A024R5R9
0.286752	5.31737	2.87542	0.00936693	0.268517	ENSG00000138182.14	FALSE	ENSG00000138182	10	KIF20B	protein_coding	6419	kinesin family member 20B [Source:HGNC Symbol;Acc:HGNC:7212]	9585	Q96Q89	Q96Q89
-0.210061	8.60615	-2.87529	0.00936975	0.268517	ENSG00000113013.13	FALSE	ENSG00000113013	5	HSPA9	protein_coding	4727	heat shock protein family A _Hsp70_ member 9 [Source:HGNC Symbol;Acc:HGNC:5244]	3313	P38646	P38646
0.301488	3.76908	2.87055	0.00946915	0.27015	ENSG00000185404.16	FALSE	ENSG00000185404	2	SP140L	protein_coding	3070	SP140 nuclear body protein like [Source:HGNC Symbol;Acc:HGNC:25105]	93349	U5Y3L1	U5Y3L1
0.280875	3.75561	2.8695	0.00949125	0.27015	ENSG00000100629.16	FALSE	ENSG00000100629	14	CEP128	protein_coding	4662	centrosomal protein 128 [Source:HGNC Symbol;Acc:HGNC:20359]	145508	Q6ZU80	Q6ZU80
-0.207228	4.66043	-2.86879	0.00950624	0.27015	ENSG00000204104.11	FALSE	ENSG00000204104	2	TRAF3IP1	protein_coding	4279	TRAF3 interacting protein 1 [Source:HGNC Symbol;Acc:HGNC:17861]	26146	Q8TDR0	Q8TDR0
-0.211386	5.44138	-2.86728	0.00953818	0.27015	ENSG00000007923.15	FALSE	ENSG00000007923	1	DNAJC11	protein_coding	3311	DnaJ heat shock protein family _Hsp40_ member C11 [Source:HGNC Symbol;Acc:HGNC:25570]	55735	Q9NVH1	Q9NVH1
-0.218761	3.70087	-2.86713	0.00954137	0.27015	ENSG00000127952.16	FALSE	ENSG00000127952	7	STYXL1	protein_coding	1570	serine/threonine/tyrosine interacting like 1 [Source:HGNC Symbol;Acc:HGNC:18165]	51657	A0A024R4L1	A0A024R4L1
0.342555	2.88533	2.86627	0.0095597	0.27015	ENSG00000075702.17	FALSE	ENSG00000075702	19	WDR62	protein_coding	5971	WD repeat domain 62 [Source:HGNC Symbol;Acc:HGNC:24502]	284403	O43379	O43379
0.226288	5.14977	2.8655	0.00957594	0.27015	ENSG00000197535.14	FALSE	ENSG00000197535	15	MYO5A	protein_coding	12225	myosin VA [Source:HGNC Symbol;Acc:HGNC:7602]	4644	Q9UES4	Q9UES4
-0.635441	-0.16978	-2.86456	0.00959618	0.27015	ENSG00000133983.14	FALSE	ENSG00000133983	14	COX16	protein_coding	1717	cytochrome c oxidase assembly factor COX16 [Source:HGNC Symbol;Acc:HGNC:20213]	51241	B8XYC5	B8XYC5
0.188952	5.51967	2.86339	0.00962118	0.27015	ENSG00000176105.13	FALSE	ENSG00000176105	18	YES1	protein_coding	4639	YES proto-oncogene 1, Src family tyrosine kinase [Source:HGNC Symbol;Acc:HGNC:12841]	7525	P07947	P07947
-0.46614	5.94848	-2.86281	0.00963344	0.27015	ENSG00000127831.10	FALSE	ENSG00000127831	2	VIL1	protein_coding	6531	villin 1 [Source:HGNC Symbol;Acc:HGNC:12690]	7429	P09327	P09327
-0.23766	5.57762	-2.86061	0.00968074	0.270895	ENSG00000153879.8	FALSE	ENSG00000153879	19	CEBPG	protein_coding	4109	CCAAT enhancer binding protein gamma [Source:HGNC Symbol;Acc:HGNC:1837]	1054	P53567	P53567
0.309605	2.89986	2.85957	0.00970316	0.270942	ENSG00000069493.14	FALSE	ENSG00000069493	12	CLEC2D	protein_coding	5279	C-type lectin domain family 2 member D [Source:HGNC Symbol;Acc:HGNC:14351]	29121	Q9UHP7	Q9UHP7
-0.426164	3.31952	-2.85768	0.00974388	0.271499	ENSG00000274641.1	FALSE	ENSG00000274641	6	HIST1H2BO	protein_coding	381	histone cluster 1 H2B family member o [Source:HGNC Symbol;Acc:HGNC:4758]	8348	P23527	P23527
-0.2849	4.41634	-2.85094	0.00989105	0.275013	ENSG00000188191.14	FALSE	ENSG00000188191	7	PRKAR1B	protein_coding	2553	protein kinase cAMP-dependent type I regulatory subunit beta [Source:HGNC Symbol;Acc:HGNC:9390]	5575	P31321	P31321
0.558564	0.808118	2.8495	0.00992269	0.275307	ENSG00000168779.19	FALSE	ENSG00000168779	3	SHOX2	protein_coding	4184	short stature homeobox 2 [Source:HGNC Symbol;Acc:HGNC:10854]	6474	O60902	O60902
0.141489	5.75387	2.84564	0.0100081	0.277088	ENSG00000166887.15	FALSE	ENSG00000166887	15	VPS39	protein_coding	4844	VPS39, HOPS complex subunit [Source:HGNC Symbol;Acc:HGNC:20593]	23339	Q96JC1	Q96JC1
-0.219947	7.68957	-2.84354	0.0100547	0.277791	ENSG00000113407.13	FALSE	ENSG00000113407	5	TARS	protein_coding	4314	threonyl-tRNA synthetase [Source:HGNC Symbol;Acc:HGNC:11572]	6897	P26639	P26639
-0.221266	3.4207	-2.84209	0.0100872	0.27786	ENSG00000049167.14	FALSE	ENSG00000049167	5	ERCC8	protein_coding	3424	ERCC excision repair 8, CSA ubiquitin ligase complex subunit [Source:HGNC Symbol;Acc:HGNC:3439]	1161	Q13216	Q13216
-0.25991	8.69028	-2.84153	0.0100997	0.27786	ENSG00000197956.9	FALSE	ENSG00000197956	1	S100A6	protein_coding	673	S100 calcium binding protein A6 [Source:HGNC Symbol;Acc:HGNC:10496]	6277	P06703	P06703
-0.249617	4.76196	-2.84032	0.0101269	0.278022	ENSG00000174744.13	FALSE	ENSG00000174744	11	BRMS1	protein_coding	1817	BRMS1, transcriptional repressor and anoikis regulator [Source:HGNC Symbol;Acc:HGNC:17262]	25855	G5E9I4	G5E9I4
-0.233635	4.01591	-2.83757	0.0101888	0.279135	ENSG00000156313.13	FALSE	ENSG00000156313	X	RPGR	protein_coding	4768	retinitis pigmentosa GTPase regulator [Source:HGNC Symbol;Acc:HGNC:10295]	6103	Q92834	Q92834
0.157262	5.35935	2.83662	0.0102104	0.279142	ENSG00000132912.12	FALSE	ENSG00000132912	5	DCTN4	protein_coding	4208	dynactin subunit 4 [Source:HGNC Symbol;Acc:HGNC:15518]	51164	Q9NSJ5	Q9NSJ5
-0.171643	5.53437	-2.83343	0.0102828	0.280029	ENSG00000149823.8	FALSE	ENSG00000149823	11	VPS51	protein_coding	2714	VPS51, GARP complex subunit [Source:HGNC Symbol;Acc:HGNC:1172]	738	Q9UID3	Q9UID3
0.255543	5.22515	2.8333	0.0102857	0.280029	ENSG00000099940.11	FALSE	ENSG00000099940	22	SNAP29	protein_coding	4287	synaptosome associated protein 29 [Source:HGNC Symbol;Acc:HGNC:11133]	9342	O95721	O95721
-0.252206	3.2957	-2.83018	0.0103571	0.28069	ENSG00000063176.15	FALSE	ENSG00000063176	19	SPHK2	protein_coding	3085	sphingosine kinase 2 [Source:HGNC Symbol;Acc:HGNC:18859]	56848	B3KV83	B3KV83
0.351051	3.41997	2.82986	0.0103645	0.28069	ENSG00000065328.16	FALSE	ENSG00000065328	10	MCM10	protein_coding	4587	minichromosome maintenance 10 replication initiation factor [Source:HGNC Symbol;Acc:HGNC:18043]	55388	Q7L590	Q7L590
0.628212	1.34493	2.82943	0.0103745	0.28069	ENSG00000127423.10	FALSE	ENSG00000127423	1	AUNIP	protein_coding	2116	aurora kinase A and ninein interacting protein [Source:HGNC Symbol;Acc:HGNC:28363]	79000	Q9H7T9	Q9H7T9
0.245976	4.81633	2.82637	0.010445	0.281359	ENSG00000152413.14	FALSE	ENSG00000152413	5	HOMER1	protein_coding	5881	homer scaffold protein 1 [Source:HGNC Symbol;Acc:HGNC:17512]	9456	Q86YM7	Q86YM7
-0.160697	5.45905	-2.82599	0.0104537	0.281359	ENSG00000033170.16	FALSE	ENSG00000033170	14	FUT8	protein_coding	5166	fucosyltransferase 8 [Source:HGNC Symbol;Acc:HGNC:4019]	2530	Q546E0	Q546E0
0.440268	1.9506	2.82545	0.0104663	0.281359	ENSG00000143369.14	FALSE	ENSG00000143369	1	ECM1	protein_coding	3066	extracellular matrix protein 1 [Source:HGNC Symbol;Acc:HGNC:3153]	1893	Q16610	Q16610
-0.245116	3.36843	-2.82439	0.010491	0.281359	ENSG00000116691.10	FALSE	ENSG00000116691	1	MIIP	protein_coding	1709	migration and invasion inhibitory protein [Source:HGNC Symbol;Acc:HGNC:25715]	60672	Q5JXC2	Q5JXC2
0.257627	4.8829	2.82371	0.0105068	0.281359	ENSG00000106462.10	FALSE	ENSG00000106462	7	EZH2	protein_coding	3641	enhancer of zeste 2 polycomb repressive complex 2 subunit [Source:HGNC Symbol;Acc:HGNC:3527]	2146	Q15910	Q15910
-0.643494	-0.306783	-2.82128	0.0105634	0.282297	ENSG00000130751.9	FALSE	ENSG00000130751	19	NPAS1	protein_coding	2117	neuronal PAS domain protein 1 [Source:HGNC Symbol;Acc:HGNC:7894]	4861	Q99742	Q99742
0.297985	4.55155	2.81872	0.0106236	0.282934	ENSG00000137812.19	FALSE	ENSG00000137812	15	KNL1	protein_coding	9573	kinetochore scaffold 1 [Source:HGNC Symbol;Acc:HGNC:24054]	57082	Q8NG31	Q8NG31
0.420899	4.83852	2.81759	0.01065	0.282934	ENSG00000265972.5	FALSE	ENSG00000265972	1	TXNIP	protein_coding	2926	thioredoxin interacting protein [Source:HGNC Symbol;Acc:HGNC:16952]	10628	Q9H3M7	Q9H3M7
-0.155704	5.2923	-2.81188	0.0107855	0.282934	ENSG00000133316.15	FALSE	ENSG00000133316	11	WDR74	protein_coding	1736	WD repeat domain 74 [Source:HGNC Symbol;Acc:HGNC:25529]	54663	Q6RFH5	Q6RFH5
-0.271256	4.89067	-2.81135	0.0107983	0.282934	ENSG00000180879.13	FALSE	ENSG00000180879	X	SSR4	protein_coding	2482	signal sequence receptor subunit 4 [Source:HGNC Symbol;Acc:HGNC:11326]	6748	P51571	P51571
0.688214	0.682166	2.81125	0.0108005	0.282934	ENSG00000101298.14	FALSE	ENSG00000101298	20	SNPH	protein_coding	5533	syntaphilin [Source:HGNC Symbol;Acc:HGNC:15931]	9751	O15079	O15079
-0.216989	5.57763	-2.81122	0.0108014	0.282934	ENSG00000167106.11	FALSE	ENSG00000167106	9	FAM102A	protein_coding	4316	family with sequence similarity 102 member A [Source:HGNC Symbol;Acc:HGNC:31419]	399665	Q5T9C2	Q5T9C2
0.144666	4.71296	2.81034	0.0108223	0.282934	ENSG00000196455.7	FALSE	ENSG00000196455	3	PIK3R4	protein_coding	5015	phosphoinositide-3-kinase regulatory subunit 4 [Source:HGNC Symbol;Acc:HGNC:8982]	30849	Q99570	Q99570
0.184384	7.20015	2.81012	0.0108276	0.282934	ENSG00000118816.9	FALSE	ENSG00000118816	4	CCNI	protein_coding	2772	cyclin I [Source:HGNC Symbol;Acc:HGNC:1595]	10983	A0A024RDH0	A0A024RDH0
-0.335092	2.5231	-2.8099	0.0108329	0.282934	ENSG00000125459.15	FALSE	ENSG00000125459	1	MSTO1	protein_coding	2490	misato 1, mitochondrial distribution and morphology regulator [Source:HGNC Symbol;Acc:HGNC:29678]	55154	Q9BUK6	Q9BUK6
0.412503	3.80023	2.80933	0.0108465	0.282934	ENSG00000111206.12	FALSE	ENSG00000111206	12	FOXM1	protein_coding	3487	forkhead box M1 [Source:HGNC Symbol;Acc:HGNC:3818]	2305	A0A0D9SFF0	A0A0D9SFF0
0.156879	5.43771	2.80859	0.0108643	0.282934	ENSG00000119231.10	FALSE	ENSG00000119231	3	SENP5	protein_coding	6308	SUMO specific peptidase 5 [Source:HGNC Symbol;Acc:HGNC:28407]	205564	B2R9F5	B2R9F5
0.27326	4.82542	2.80749	0.0108908	0.282934	ENSG00000155097.11	FALSE	ENSG00000155097	8	ATP6V1C1	protein_coding	5612	ATPase H+ transporting V1 subunit C1 [Source:HGNC Symbol;Acc:HGNC:856]	528	A0A024R9I0	A0A024R9I0
0.303654	2.91174	2.80686	0.0109061	0.282934	ENSG00000115350.11	FALSE	ENSG00000115350	2	POLE4	protein_coding	1248	DNA polymerase epsilon 4, accessory subunit [Source:HGNC Symbol;Acc:HGNC:18755]	56655	Q9NR33	Q9NR33
-0.227948	4.24788	-2.80373	0.0109816	0.282934	ENSG00000054148.17	FALSE	ENSG00000054148	9	PHPT1	protein_coding	1316	phosphohistidine phosphatase 1 [Source:HGNC Symbol;Acc:HGNC:30033]	29085	Q9NRX4	Q9NRX4
-0.36269	2.75669	-2.80273	0.0110059	0.282934	ENSG00000156795.7	FALSE	ENSG00000156795	8	WDYHV1	protein_coding	3502	WDYHV motif containing 1 [Source:HGNC Symbol;Acc:HGNC:25490]	55093	Q96HA8	Q96HA8
0.355273	3.4468	2.80271	0.0110065	0.282934	ENSG00000149636.15	FALSE	ENSG00000149636	20	DSN1	protein_coding	2447	DSN1 homolog, MIS12 kinetochore complex component [Source:HGNC Symbol;Acc:HGNC:16165]	79980	Q9H410	Q9H410
-0.21284	4.29862	-2.80196	0.0110248	0.282934	ENSG00000166046.10	FALSE	ENSG00000166046	12	TCP11L2	protein_coding	3198	t-complex 11 like 2 [Source:HGNC Symbol;Acc:HGNC:28627]	255394	Q8N4U5	Q8N4U5
-0.257438	3.15099	-2.79808	0.0111197	0.282934	ENSG00000142409.5	FALSE	ENSG00000142409	19	ZNF787	protein_coding	1925	zinc finger protein 787 [Source:HGNC Symbol;Acc:HGNC:26998]	126208	Q6DD87	Q6DD87
-0.153683	6.43588	-2.7979	0.0111242	0.282934	ENSG00000106153.12	FALSE	ENSG00000106153	7	CHCHD2	protein_coding	901	coiled-coil-helix-coiled-coil-helix domain containing 2 [Source:HGNC Symbol;Acc:HGNC:21645]	51142	Q9Y6H1	Q9Y6H1
-0.636035	1.5961	-2.79766	0.0111299	0.282934	ENSG00000187122.16	FALSE	ENSG00000187122	10	SLIT1	protein_coding	7925	slit guidance ligand 1 [Source:HGNC Symbol;Acc:HGNC:11085]	6585	A6H8V1	A6H8V1
-0.512254	1.51933	-2.79694	0.0111477	0.282934	ENSG00000171443.6	FALSE	ENSG00000171443	19	ZNF524	protein_coding	1260	zinc finger protein 524 [Source:HGNC Symbol;Acc:HGNC:28322]	147807	Q96C55	Q96C55
0.229863	4.37536	2.796	0.0111709	0.282934	ENSG00000139517.8	FALSE	ENSG00000139517	13	LNX2	protein_coding	4648	ligand of numb-protein X 2 [Source:HGNC Symbol;Acc:HGNC:20421]	222484	Q8N448	Q8N448
-0.285115	4.37719	-2.79508	0.0111935	0.282934	ENSG00000198931.10	FALSE	ENSG00000198931	16	APRT	protein_coding	947	adenine phosphoribosyltransferase [Source:HGNC Symbol;Acc:HGNC:626]	353	P07741	P07741
0.201553	4.74546	2.79444	0.0112095	0.282934	ENSG00000004975.11	FALSE	ENSG00000004975	17	DVL2	protein_coding	3018	dishevelled segment polarity protein 2 [Source:HGNC Symbol;Acc:HGNC:3086]	1856	O14641	O14641
-0.213784	3.91515	-2.79393	0.0112221	0.282934	ENSG00000166165.12	FALSE	ENSG00000166165	14	CKB	protein_coding	1709	creatine kinase B [Source:HGNC Symbol;Acc:HGNC:1991]	1152	P12277	P12277
-1.58761	-0.426109	-2.79329	0.011238	0.282934	ENSG00000164946.19	FALSE	ENSG00000164946	9	FREM1	protein_coding	10086	FRAS1 related extracellular matrix 1 [Source:HGNC Symbol;Acc:HGNC:23399]	158326	Q5H8C1	Q5H8C1
-0.161956	5.66062	-2.79279	0.0112505	0.282934	ENSG00000100462.15	FALSE	ENSG00000100462	14	PRMT5	protein_coding	2531	protein arginine methyltransferase 5 [Source:HGNC Symbol;Acc:HGNC:10894]	10419	O14744	O14744
-0.405354	3.55021	-2.79253	0.0112568	0.282934	ENSG00000110080.18	FALSE	ENSG00000110080	11	ST3GAL4	protein_coding	1967	ST3 beta-galactoside alpha-2,3-sialyltransferase 4 [Source:HGNC Symbol;Acc:HGNC:10864]	6484	Q11206	Q11206
0.17997	5.88379	2.79221	0.0112648	0.282934	ENSG00000151835.15	FALSE	ENSG00000151835	13	SACS	protein_coding	15665	sacsin molecular chaperone [Source:HGNC Symbol;Acc:HGNC:10519]	26278	Q9NZJ4	Q9NZJ4
-0.154449	7.11572	-2.79127	0.0112882	0.282934	ENSG00000166913.12	FALSE	ENSG00000166913	20	YWHAB	protein_coding	5867	tyrosine 3-monooxygenase/tryptophan 5-monooxygenase activation protein beta [Source:HGNC Symbol;Acc:HGNC:12849]	7529	P31946	P31946
-0.311406	4.01053	-2.79104	0.011294	0.282934	ENSG00000196465.10	FALSE	ENSG00000196465	12	MYL6B	protein_coding	1305	myosin light chain 6B [Source:HGNC Symbol;Acc:HGNC:29823]	140465	A0A024RB31	A0A024RB31
0.331844	3.12727	2.79079	0.0113001	0.282934	ENSG00000162817.6	FALSE	ENSG00000162817	1	C1ORF115	protein_coding	3413	chromosome 1 open reading frame 115 [Source:HGNC Symbol;Acc:HGNC:25873]	79762	Q9H7X2	Q9H7X2
0.319044	3.56609	2.79073	0.0113018	0.282934	ENSG00000167900.11	FALSE	ENSG00000167900	17	TK1	protein_coding	1681	thymidine kinase 1 [Source:HGNC Symbol;Acc:HGNC:11830]	7083	K7ES52	K7ES52
-0.198271	3.41001	-2.78455	0.011457	0.286271	ENSG00000173918.14	FALSE	ENSG00000173918	17	C1QTNF1	protein_coding	3100	C1q and TNF related 1 [Source:HGNC Symbol;Acc:HGNC:14324]	114897	Q9BXJ1	Q9BXJ1
0.21138	5.61021	2.78331	0.0114882	0.286504	ENSG00000067955.13	FALSE	ENSG00000067955	16	CBFB	protein_coding	3136	core-binding factor subunit beta [Source:HGNC Symbol;Acc:HGNC:1539]	865	A0A024R6X2	A0A024R6X2
0.153094	5.78906	2.77913	0.0115946	0.288047	ENSG00000149231.13	FALSE	ENSG00000149231	11	CCDC82	protein_coding	8047	coiled-coil domain containing 82 [Source:HGNC Symbol;Acc:HGNC:26282]	79780	A0A024R3B3	A0A024R3B3
-0.390271	2.54891	-2.77896	0.0115991	0.288047	ENSG00000071575.11	FALSE	ENSG00000071575	2	TRIB2	protein_coding	4391	tribbles pseudokinase 2 [Source:HGNC Symbol;Acc:HGNC:30809]	28951	Q92519	Q92519
-0.219266	3.31983	-2.77829	0.0116162	0.288047	ENSG00000176371.13	FALSE	ENSG00000176371	15	ZSCAN2	protein_coding	3813	zinc finger and SCAN domain containing 2 [Source:HGNC Symbol;Acc:HGNC:20994]	54993	Q7Z7L9	Q7Z7L9
0.165634	4.74058	2.77644	0.0116636	0.288674	ENSG00000129691.15	FALSE	ENSG00000129691	8	ASH2L	protein_coding	3090	ASH2 like, histone lysine methyltransferase complex subunit [Source:HGNC Symbol;Acc:HGNC:744]	9070	Q9UBL3	Q9UBL3
-0.813247	-1.04584	-2.77293	0.0117543	0.290369	ENSG00000186517.13	FALSE	ENSG00000186517	1	ARHGAP30	protein_coding	4857	Rho GTPase activating protein 30 [Source:HGNC Symbol;Acc:HGNC:27414]	257106	Q7Z6I6	Q7Z6I6
-0.208884	4.21012	-2.77051	0.0118171	0.290495	ENSG00000011009.10	FALSE	ENSG00000011009	1	LYPLA2	protein_coding	1810	lysophospholipase II [Source:HGNC Symbol;Acc:HGNC:6738]	11313	A0A140VJC9	A0A140VJC9
-0.291025	4.10433	-2.77023	0.0118245	0.290495	ENSG00000261236.7	FALSE	ENSG00000261236	8	BOP1	protein_coding	2303	block of proliferation 1 [Source:HGNC Symbol;Acc:HGNC:15519]	23246	Q14137	Q14137
0.619414	0.826613	2.76888	0.0118597	0.290495	ENSG00000140511.11	FALSE	ENSG00000140511	15	HAPLN3	protein_coding	3071	hyaluronan and proteoglycan link protein 3 [Source:HGNC Symbol;Acc:HGNC:21446]	145864	A8K7T8	A8K7T8
-0.160708	5.65755	-2.76868	0.0118648	0.290495	ENSG00000184428.12	FALSE	ENSG00000184428	8	TOP1MT	protein_coding	2029	DNA topoisomerase I mitochondrial [Source:HGNC Symbol;Acc:HGNC:29787]	116447	Q969P6	Q969P6
-0.160564	6.25894	-2.76846	0.0118705	0.290495	ENSG00000105568.17	FALSE	ENSG00000105568	19	PPP2R1A	protein_coding	5380	protein phosphatase 2 scaffold subunit Aalpha [Source:HGNC Symbol;Acc:HGNC:9302]	5518	A8K7B7	A8K7B7
-0.444637	2.73064	-2.76508	0.0119593	0.29212	ENSG00000126603.8	FALSE	ENSG00000126603	16	GLIS2	protein_coding	4469	GLIS family zinc finger 2 [Source:HGNC Symbol;Acc:HGNC:29450]	84662	B3KTH4	B3KTH4
0.342452	3.55954	2.76229	0.0120331	0.293057	ENSG00000186352.8	FALSE	ENSG00000186352	4	ANKRD37	protein_coding	1444	ankyrin repeat domain 37 [Source:HGNC Symbol;Acc:HGNC:29593]	353322	Q7Z713	Q7Z713
-0.246253	4.36577	-2.76193	0.0120425	0.293057	ENSG00000116649.9	FALSE	ENSG00000116649	1	SRM	protein_coding	1266	spermidine synthase [Source:HGNC Symbol;Acc:HGNC:11296]	6723	P19623	P19623
0.182339	4.25526	2.76018	0.012089	0.293249	ENSG00000122483.17	FALSE	ENSG00000122483	1	CCDC18	protein_coding	4867	coiled-coil domain containing 18 [Source:HGNC Symbol;Acc:HGNC:30370]	343099	Q5T9S5	Q5T9S5
-0.338653	3.15658	-2.75994	0.0120953	0.293249	ENSG00000143320.8	FALSE	ENSG00000143320	1	CRABP2	protein_coding	1033	cellular retinoic acid binding protein 2 [Source:HGNC Symbol;Acc:HGNC:2339]	1382	P29373	P29373
0.196549	5.06765	2.7579	0.0121499	0.294028	ENSG00000128923.10	FALSE	ENSG00000128923	15	MINDY2	protein_coding	9238	MINDY lysine 48 deubiquitinase 2 [Source:HGNC Symbol;Acc:HGNC:26954]	54629	Q8NBR6	Q8NBR6
-0.19092	4.50621	-2.75591	0.0122032	0.294773	ENSG00000137054.15	FALSE	ENSG00000137054	9	POLR1E	protein_coding	2229	RNA polymerase I subunit E [Source:HGNC Symbol;Acc:HGNC:17631]	64425	B4E005	B4E005
-0.237894	4.39159	-2.7537	0.0122627	0.295288	ENSG00000114631.10	FALSE	ENSG00000114631	3	PODXL2	protein_coding	2186	podocalyxin like 2 [Source:HGNC Symbol;Acc:HGNC:17936]	50512	Q9NZ53	Q9NZ53
-0.177366	4.79778	-2.75344	0.0122698	0.295288	ENSG00000119509.12	FALSE	ENSG00000119509	9	INVS	protein_coding	3709	inversin [Source:HGNC Symbol;Acc:HGNC:17870]	27130	Q2M1I4	Q2M1I4
-0.153343	5.82548	-2.75149	0.0123223	0.295542	ENSG00000100138.14	FALSE	ENSG00000100138	22	SNU13	protein_coding	1503	small nuclear ribonucleoprotein 13 [Source:HGNC Symbol;Acc:HGNC:7819]	4809	P55769	P55769
-0.185074	8.64279	-2.75137	0.0123256	0.295542	ENSG00000132470.13	FALSE	ENSG00000132470	17	ITGB4	protein_coding	5919	integrin subunit beta 4 [Source:HGNC Symbol;Acc:HGNC:6158]	3691	A0A024R8T0	A0A024R8T0
0.400227	2.76666	2.74872	0.0123976	0.296227	ENSG00000134317.17	FALSE	ENSG00000134317	2	GRHL1	protein_coding	5400	grainyhead like transcription factor 1 [Source:HGNC Symbol;Acc:HGNC:17923]	29841	Q9NZI5	Q9NZI5
-0.136703	4.24315	-2.74865	0.0123995	0.296227	ENSG00000005194.14	FALSE	ENSG00000005194	16	CIAPIN1	protein_coding	2182	cytokine induced apoptosis inhibitor 1 [Source:HGNC Symbol;Acc:HGNC:28050]	57019	Q6FI81	Q6FI81
-0.220472	5.11732	-2.74693	0.0124465	0.296255	ENSG00000130762.14	FALSE	ENSG00000130762	1	ARHGEF16	protein_coding	3061	Rho guanine nucleotide exchange factor 16 [Source:HGNC Symbol;Acc:HGNC:15515]	27237	B3KTS4	B3KTS4
-0.286548	4.01039	-2.74679	0.0124504	0.296255	ENSG00000254726.2	FALSE	ENSG00000254726	1	MEX3A	protein_coding	6124	mex-3 RNA binding family member A [Source:HGNC Symbol;Acc:HGNC:33482]	92312	A1L020	A1L020
0.254071	4.2723	2.74268	0.0125634	0.296255	ENSG00000151233.10	FALSE	ENSG00000151233	12	GXYLT1	protein_coding	7497	glucoside xylosyltransferase 1 [Source:HGNC Symbol;Acc:HGNC:27482]	283464	Q4G148	Q4G148
-0.139038	7.591	-2.74238	0.0125717	0.296255	ENSG00000065000.17	FALSE	ENSG00000065000	19	AP3D1	protein_coding	5065	adaptor related protein complex 3 subunit delta 1 [Source:HGNC Symbol;Acc:HGNC:568]	8943	O14617	O14617
0.621591	3.50529	2.74223	0.0125758	0.296255	ENSG00000164125.15	FALSE	ENSG00000164125	4	FAM198B	protein_coding	4985	family with sequence similarity 198 member B [Source:HGNC Symbol;Acc:HGNC:25312]	51313	Q6UWH4	Q6UWH4
0.999726	-1.45128	2.74202	0.0125817	0.296255	ENSG00000162998.4	FALSE	ENSG00000162998	2	FRZB	protein_coding	3162	frizzled related protein [Source:HGNC Symbol;Acc:HGNC:3959]	2487	D9ZGF6	D9ZGF6
-0.960643	-0.678477	-2.74192	0.0125842	0.296255	ENSG00000142484.6	FALSE	ENSG00000142484	17	TM4SF5	protein_coding	932	transmembrane 4 L six family member 5 [Source:HGNC Symbol;Acc:HGNC:11857]	9032	O14894	O14894
-0.141126	5.77035	-2.74125	0.0126028	0.296255	ENSG00000177426.20	FALSE	ENSG00000177426	18	TGIF1	protein_coding	3030	TGFB induced factor homeobox 1 [Source:HGNC Symbol;Acc:HGNC:11776]	7050	Q15583	Q15583
-0.234371	4.58932	-2.74118	0.0126047	0.296255	ENSG00000154743.17	FALSE	ENSG00000154743	3	TSEN2	protein_coding	3918	tRNA splicing endonuclease subunit 2 [Source:HGNC Symbol;Acc:HGNC:28422]	80746	A0A024R2H2	A0A024R2H2
-0.277052	3.96209	-2.73995	0.0126389	0.296387	ENSG00000032389.12	FALSE	ENSG00000032389	2	EIPR1	protein_coding	2932	EARP complex and GARP complex interacting protein 1 [Source:HGNC Symbol;Acc:HGNC:12383]	7260	A8MUM1	A8MUM1
-0.677377	1.6636	-2.73935	0.0126556	0.296387	ENSG00000171747.8	FALSE	ENSG00000171747	19	LGALS4	protein_coding	1535	galectin 4 [Source:HGNC Symbol;Acc:HGNC:6565]	3960	P56470	P56470
-0.187044	4.71162	-2.73637	0.0127388	0.2978	ENSG00000166987.14	FALSE	ENSG00000166987	12	MBD6	protein_coding	4282	methyl-CpG binding domain protein 6 [Source:HGNC Symbol;Acc:HGNC:20445]	114785	A0A024RBA3	A0A024RBA3
0.258601	6.14796	2.73438	0.0127945	0.297905	ENSG00000167325.14	FALSE	ENSG00000167325	11	RRM1	protein_coding	3166	ribonucleotide reductase catalytic subunit M1 [Source:HGNC Symbol;Acc:HGNC:10451]	6240	P23921	P23921
-0.160896	4.61672	-2.7336	0.0128164	0.297905	ENSG00000111802.13	FALSE	ENSG00000111802	6	TDP2	protein_coding	2120	tyrosyl-DNA phosphodiesterase 2 [Source:HGNC Symbol;Acc:HGNC:17768]	51567	O95551	O95551
0.36803	2.12948	2.73314	0.0128294	0.297905	ENSG00000111644.7	FALSE	ENSG00000111644	12	ACRBP	protein_coding	1933	acrosin binding protein [Source:HGNC Symbol;Acc:HGNC:17195]	84519	A0A140VJD6	A0A140VJD6
0.29102	3.72202	2.73286	0.0128372	0.297905	ENSG00000176225.13	FALSE	ENSG00000176225	18	RTTN	protein_coding	8088	rotatin [Source:HGNC Symbol;Acc:HGNC:18654]	25914	Q86VV8	Q86VV8
0.115418	6.4342	2.73158	0.0128734	0.297905	ENSG00000124788.18	FALSE	ENSG00000124788	6	ATXN1	protein_coding	10602	ataxin 1 [Source:HGNC Symbol;Acc:HGNC:10548]	6310	P54253	P54253
0.191228	5.68151	2.73001	0.0129178	0.297905	ENSG00000184445.11	FALSE	ENSG00000184445	12	KNTC1	protein_coding	6975	kinetochore associated 1 [Source:HGNC Symbol;Acc:HGNC:17255]	9735	P50748	P50748
-0.803672	1.98847	-2.72988	0.0129214	0.297905	ENSG00000148671.13	FALSE	ENSG00000148671	10	ADIRF	protein_coding	917	adipogenesis regulatory factor [Source:HGNC Symbol;Acc:HGNC:24043]	10974	Q15847	Q15847
-0.142428	5.09574	-2.72973	0.0129256	0.297905	ENSG00000110660.14	FALSE	ENSG00000110660	11	SLC35F2	protein_coding	3331	solute carrier family 35 member F2 [Source:HGNC Symbol;Acc:HGNC:23615]	54733	Q8IXU6	Q8IXU6
-0.263523	4.58829	-2.72885	0.0129507	0.297957	ENSG00000203697.11	FALSE	ENSG00000203697	1	CAPN8	protein_coding	2596	calpain 8 [Source:HGNC Symbol;Acc:HGNC:1485]	388743	A6NHC0	A6NHC0
0.47092	1.56046	2.72697	0.0130042	0.298285	ENSG00000170542.5	FALSE	ENSG00000170542	6	SERPINB9	protein_coding	4118	serpin family B member 9 [Source:HGNC Symbol;Acc:HGNC:8955]	5272	A0A024QZT4	A0A024QZT4
-0.785635	0.594565	-2.72573	0.0130397	0.298285	ENSG00000177694.15	FALSE	ENSG00000177694	3	NAALADL2	protein_coding	9865	N-acetylated alpha-linked acidic dipeptidase like 2 [Source:HGNC Symbol;Acc:HGNC:23219]	254827	Q58DX5	Q58DX5
-0.135975	4.54091	-2.72522	0.0130542	0.298285	ENSG00000160685.13	FALSE	ENSG00000160685	1	ZBTB7B	protein_coding	4017	zinc finger and BTB domain containing 7B [Source:HGNC Symbol;Acc:HGNC:18668]	51043	O15156	O15156
-0.221257	5.56666	-2.72515	0.0130562	0.298285	ENSG00000107404.19	FALSE	ENSG00000107404	1	DVL1	protein_coding	3239	dishevelled segment polarity protein 1 [Source:HGNC Symbol;Acc:HGNC:3084]	1855	O14640	O14640
-1.16446	-1.37573	-2.72433	0.0130798	0.298301	ENSG00000285827.1	FALSE	ENSG00000285827	11	AP001267.5	protein_coding	4336	novel protein	#N/A	#N/A	#N/A
0.311713	4.42146	2.72248	0.0131328	0.298844	ENSG00000175265.17	FALSE	ENSG00000175265	15	GOLGA8A	protein_coding	6233	golgin A8 family member A [Source:HGNC Symbol;Acc:HGNC:31972]	23015	A7E2F4	A7E2F4
-1.04237	-1.21959	-2.7214	0.013164	0.298844	ENSG00000160678.11	FALSE	ENSG00000160678	1	S100A1	protein_coding	2621	S100 calcium binding protein A1 [Source:HGNC Symbol;Acc:HGNC:10486]	6271	A0A0S2Z4H2	A0A0S2Z4H2
-0.181516	5.94668	-2.72111	0.0131722	0.298844	ENSG00000168924.14	FALSE	ENSG00000168924	4	LETM1	protein_coding	5462	leucine zipper and EF-hand containing transmembrane protein 1 [Source:HGNC Symbol;Acc:HGNC:6556]	3954	O95202	O95202
-0.273804	3.45374	-2.71736	0.0132811	0.300781	ENSG00000091947.9	FALSE	ENSG00000091947	17	TMEM101	protein_coding	1830	transmembrane protein 101 [Source:HGNC Symbol;Acc:HGNC:28653]	84336	B4DFS4	B4DFS4
-0.262497	3.80169	-2.71642	0.0133085	0.300781	ENSG00000171425.9	FALSE	ENSG00000171425	19	ZNF581	protein_coding	1324	zinc finger protein 581 [Source:HGNC Symbol;Acc:HGNC:25017]	51545	Q9P0T4	Q9P0T4
-0.61521	-1.83939	-2.71558	0.0133329	0.300781	ENSG00000124875.9	FALSE	ENSG00000124875	4	CXCL6	protein_coding	1718	C-X-C motif chemokine ligand 6 [Source:HGNC Symbol;Acc:HGNC:10643]	6372	P80162	P80162
-0.144136	8.82335	-2.71501	0.0133496	0.300781	ENSG00000147403.16	FALSE	ENSG00000147403	X	RPL10	protein_coding	2318	ribosomal protein L10 [Source:HGNC Symbol;Acc:HGNC:10298]	6134	P27635	P27635
-0.183077	6.70124	-2.71314	0.0134044	0.301495	ENSG00000134910.13	FALSE	ENSG00000134910	11	STT3A	protein_coding	4558	STT3A, catalytic subunit of the oligosaccharyltransferase complex [Source:HGNC Symbol;Acc:HGNC:6172]	3703	P46977	P46977
0.220724	5.11993	2.71067	0.0134772	0.301931	ENSG00000196776.15	FALSE	ENSG00000196776	3	CD47	protein_coding	6796	CD47 molecule [Source:HGNC Symbol;Acc:HGNC:1682]	961	Q08722	Q08722
0.146941	7.0969	2.70961	0.0135085	0.301931	ENSG00000198668.10	FALSE	ENSG00000198668	14	CALM1	protein_coding	4242	calmodulin 1 [Source:HGNC Symbol;Acc:HGNC:1442]	808	Q96HY3	Q96HY3
-0.218794	4.90385	-2.70946	0.0135127	0.301931	ENSG00000160211.17	FALSE	ENSG00000160211	X	G6PD	protein_coding	2632	glucose-6-phosphate dehydrogenase [Source:HGNC Symbol;Acc:HGNC:4057]	2539	P11413	P11413
0.502	0.801002	2.70884	0.0135312	0.301931	ENSG00000108370.16	FALSE	ENSG00000108370	17	RGS9	protein_coding	2736	regulator of G protein signaling 9 [Source:HGNC Symbol;Acc:HGNC:10004]	8787	O75916	O75916
0.701144	0.246942	2.70857	0.0135393	0.301931	ENSG00000183760.10	FALSE	ENSG00000183760	19	ACP7	protein_coding	2966	acid phosphatase 7, tartrate resistant _putative_ [Source:HGNC Symbol;Acc:HGNC:33781]	390928	Q6ZNF0	Q6ZNF0
-0.126373	5.63077	-2.70611	0.0136122	0.302888	ENSG00000113719.15	FALSE	ENSG00000113719	5	ERGIC1	protein_coding	5687	endoplasmic reticulum-golgi intermediate compartment 1 [Source:HGNC Symbol;Acc:HGNC:29205]	57222	Q969X5	Q969X5
0.681359	1.68504	2.7049	0.0136484	0.302888	ENSG00000152253.8	FALSE	ENSG00000152253	2	SPC25	protein_coding	1354	SPC25, NDC80 kinetochore complex component [Source:HGNC Symbol;Acc:HGNC:24031]	57405	Q9HBM1	Q9HBM1
0.253913	3.08665	2.70452	0.0136597	0.302888	ENSG00000171161.12	FALSE	ENSG00000171161	1	ZNF672	protein_coding	2989	zinc finger protein 672 [Source:HGNC Symbol;Acc:HGNC:26179]	79894	Q499Z4	Q499Z4
0.311592	5.13801	2.70342	0.0136927	0.302888	ENSG00000115355.16	FALSE	ENSG00000115355	2	CCDC88A	protein_coding	9777	coiled-coil domain containing 88A [Source:HGNC Symbol;Acc:HGNC:25523]	55704	O14997	O14997
-0.134524	6.57399	-2.70307	0.0137033	0.302888	ENSG00000138759.18	FALSE	ENSG00000138759	4	FRAS1	protein_coding	15624	Fraser extracellular matrix complex subunit 1 [Source:HGNC Symbol;Acc:HGNC:19185]	80144	Q86XX4	Q86XX4
0.21016	5.60136	2.70184	0.0137399	0.302888	ENSG00000070367.15	FALSE	ENSG00000070367	14	EXOC5	protein_coding	10589	exocyst complex component 5 [Source:HGNC Symbol;Acc:HGNC:10696]	10640	O00471	O00471
-0.142676	6.89742	-2.70169	0.0137445	0.302888	ENSG00000152234.15	FALSE	ENSG00000152234	18	ATP5F1A	protein_coding	5818	ATP synthase F1 subunit alpha [Source:HGNC Symbol;Acc:HGNC:823]	498	P25705	P25705
-0.171207	7.63839	-2.7001	0.0137923	0.303079	ENSG00000112159.11	FALSE	ENSG00000112159	6	MDN1	protein_coding	18413	midasin AAA ATPase 1 [Source:HGNC Symbol;Acc:HGNC:18302]	23195	Q9NU22	Q9NU22
-0.268106	3.87685	-2.69964	0.0138062	0.303079	ENSG00000164051.13	FALSE	ENSG00000164051	3	CCDC51	protein_coding	1560	coiled-coil domain containing 51 [Source:HGNC Symbol;Acc:HGNC:25714]	79714	Q96ER9	Q96ER9
-0.202257	7.26676	-2.69864	0.0138365	0.303079	ENSG00000184575.11	FALSE	ENSG00000184575	12	XPOT	protein_coding	6414	exportin for tRNA [Source:HGNC Symbol;Acc:HGNC:12826]	11260	O43592	O43592
0.27693	3.72655	2.69833	0.0138459	0.303079	ENSG00000120075.5	FALSE	ENSG00000120075	17	HOXB5	protein_coding	2041	homeobox B5 [Source:HGNC Symbol;Acc:HGNC:5116]	3215	P09067	P09067
-0.646617	0.484612	-2.69735	0.0138757	0.303133	ENSG00000114378.16	FALSE	ENSG00000114378	3	HYAL1	protein_coding	2517	hyaluronidase 1 [Source:HGNC Symbol;Acc:HGNC:5320]	3373	A0A024R2X3	A0A024R2X3
0.233293	4.52841	2.69637	0.0139054	0.303133	ENSG00000015479.18	FALSE	ENSG00000015479	5	MATR3	protein_coding	7306	matrin 3 [Source:HGNC Symbol;Acc:HGNC:6912]	9782	A0A0R4J2E8	A0A0R4J2E8
-0.209134	3.58946	-2.69591	0.0139194	0.303133	ENSG00000160191.17	FALSE	ENSG00000160191	21	PDE9A	protein_coding	3412	phosphodiesterase 9A [Source:HGNC Symbol;Acc:HGNC:8795]	5152	A0A0S2Z4A3	A0A0S2Z4A3
-0.66386	0.78065	-2.69519	0.0139412	0.303133	ENSG00000259120.2	FALSE	ENSG00000259120	17	SMIM6	protein_coding	957	small integral membrane protein 6 [Source:HGNC Symbol;Acc:HGNC:40032]	100130933	P0DI80	P0DI80
-0.458968	10.6788	-2.69131	0.0140599	0.303204	ENSG00000198727.2	FALSE	ENSG00000198727	M	MT-CYB	protein_coding	1141	mitochondrially encoded cytochrome b [Source:HGNC Symbol;Acc:HGNC:7427]	4519	P00156	P00156
0.362743	2.60885	2.69017	0.0140951	0.303204	ENSG00000144395.17	FALSE	ENSG00000144395	2	CCDC150	protein_coding	3685	coiled-coil domain containing 150 [Source:HGNC Symbol;Acc:HGNC:26834]	284992	Q8NCX0	Q8NCX0
-0.341754	2.4662	-2.68952	0.0141152	0.303204	ENSG00000198933.9	FALSE	ENSG00000198933	17	TBKBP1	protein_coding	4121	TBK1 binding protein 1 [Source:HGNC Symbol;Acc:HGNC:30140]	9755	A7MCY6	A7MCY6
0.188516	4.14866	2.68813	0.0141581	0.303204	ENSG00000116514.16	FALSE	ENSG00000116514	1	RNF19B	protein_coding	2598	ring finger protein 19B [Source:HGNC Symbol;Acc:HGNC:26886]	127544	Q6ZMZ0	Q6ZMZ0
-0.327749	3.98477	-2.68737	0.0141815	0.303204	ENSG00000110881.11	FALSE	ENSG00000110881	12	ASIC1	protein_coding	4072	acid sensing ion channel subunit 1 [Source:HGNC Symbol;Acc:HGNC:100]	41	A8K1U5	A8K1U5
0.373475	2.22397	2.68655	0.0142069	0.303204	ENSG00000173890.16	FALSE	ENSG00000173890	3	GPR160	protein_coding	2039	G protein-coupled receptor 160 [Source:HGNC Symbol;Acc:HGNC:23693]	26996	Q9UJ42	Q9UJ42
-0.153577	4.68108	-2.68589	0.0142273	0.303204	ENSG00000106638.16	FALSE	ENSG00000106638	7	TBL2	protein_coding	4560	transducin beta like 2 [Source:HGNC Symbol;Acc:HGNC:11586]	26608	Q9Y4P3	Q9Y4P3
0.231751	0.407708	2.68588	0.0142278	0.303204	ENSG00000182107.6	FALSE	ENSG00000182107	14	TMEM30B	protein_coding	4471	transmembrane protein 30B [Source:HGNC Symbol;Acc:HGNC:27254]	161291	Q3MIR4	Q3MIR4
0.257694	2.96944	2.68552	0.014239	0.303204	ENSG00000076716.8	FALSE	ENSG00000076716	X	GPC4	protein_coding	4960	glypican 4 [Source:HGNC Symbol;Acc:HGNC:4452]	2239	O75487	O75487
0.271198	3.27387	2.68551	0.0142392	0.303204	ENSG00000101003.9	FALSE	ENSG00000101003	20	GINS1	protein_coding	3249	GINS complex subunit 1 [Source:HGNC Symbol;Acc:HGNC:28980]	9837	Q14691	Q14691
-0.176112	5.31902	-2.6855	0.0142394	0.303204	ENSG00000158710.14	FALSE	ENSG00000158710	1	TAGLN2	protein_coding	1604	transgelin 2 [Source:HGNC Symbol;Acc:HGNC:11554]	8407	P37802	P37802
-0.28997	3.44116	-2.685	0.014255	0.303204	ENSG00000179041.3	FALSE	ENSG00000179041	8	RRS1	protein_coding	1706	ribosome biogenesis regulator homolog [Source:HGNC Symbol;Acc:HGNC:17083]	23212	Q15050	Q15050
-0.28966	3.2391	-2.68209	0.014346	0.303204	ENSG00000063241.7	FALSE	ENSG00000063241	19	ISOC2	protein_coding	2283	isochorismatase domain containing 2 [Source:HGNC Symbol;Acc:HGNC:26278]	79763	Q96AB3	Q96AB3
0.235934	4.16011	2.68202	0.014348	0.303204	ENSG00000175575.12	FALSE	ENSG00000175575	11	PAAF1	protein_coding	4994	proteasomal ATPase associated factor 1 [Source:HGNC Symbol;Acc:HGNC:25687]	80227	A0A024R5N4	A0A024R5N4
0.200546	4.22727	2.68084	0.014385	0.303204	ENSG00000152133.14	FALSE	ENSG00000152133	2	GPATCH11	protein_coding	3906	G-patch domain containing 11 [Source:HGNC Symbol;Acc:HGNC:26768]	253635	Q8N954	Q8N954
0.338273	3.56045	2.68019	0.0144056	0.303204	ENSG00000156136.9	FALSE	ENSG00000156136	4	DCK	protein_coding	2716	deoxycytidine kinase [Source:HGNC Symbol;Acc:HGNC:2704]	1633	F5CTF3	F5CTF3
0.250375	5.32582	2.68008	0.0144091	0.303204	ENSG00000170540.14	FALSE	ENSG00000170540	16	ARL6IP1	protein_coding	2409	ADP ribosylation factor like GTPase 6 interacting protein 1 [Source:HGNC Symbol;Acc:HGNC:697]	23204	Q15041	Q15041
0.813287	1.52546	2.68005	0.0144101	0.303204	ENSG00000054983.16	FALSE	ENSG00000054983	14	GALC	protein_coding	3883	galactosylceramidase [Source:HGNC Symbol;Acc:HGNC:4115]	2581	A0A0A0MQV0	A0A0A0MQV0
-0.164163	5.68833	-2.67939	0.0144306	0.303204	ENSG00000170876.7	FALSE	ENSG00000170876	3	TMEM43	protein_coding	3341	transmembrane protein 43 [Source:HGNC Symbol;Acc:HGNC:28472]	79188	A0A024R2F9	A0A024R2F9
0.409653	2.723	2.67867	0.0144534	0.303204	ENSG00000085999.11	FALSE	ENSG00000085999	1	RAD54L	protein_coding	3108	RAD54 like [Source:HGNC Symbol;Acc:HGNC:9826]	8438	A8K996	A8K996
0.132878	8.16087	2.67828	0.0144657	0.303204	ENSG00000075292.18	FALSE	ENSG00000075292	2	ZNF638	protein_coding	6821	zinc finger protein 638 [Source:HGNC Symbol;Acc:HGNC:17894]	27332	Q14966	Q14966
-0.183402	4.60894	-2.67768	0.0144846	0.303204	ENSG00000242485.5	FALSE	ENSG00000242485	1	MRPL20	protein_coding	1693	mitochondrial ribosomal protein L20 [Source:HGNC Symbol;Acc:HGNC:14478]	55052	Q9BYC9	Q9BYC9
0.162013	6.08525	2.67751	0.01449	0.303204	ENSG00000159086.14	FALSE	ENSG00000159086	21	PAXBP1	protein_coding	3995	PAX3 and PAX7 binding protein 1 [Source:HGNC Symbol;Acc:HGNC:13579]	94104	Q8N6E6	Q8N6E6
0.139639	5.18142	2.67715	0.0145013	0.303204	ENSG00000051382.8	FALSE	ENSG00000051382	3	PIK3CB	protein_coding	5919	phosphatidylinositol-4,5-bisphosphate 3-kinase catalytic subunit beta [Source:HGNC Symbol;Acc:HGNC:8976]	5291	B4DER4	B4DER4
-0.16866	5.69569	-2.67502	0.0145689	0.304132	ENSG00000152556.16	FALSE	ENSG00000152556	12	PFKM	protein_coding	3579	phosphofructokinase, muscle [Source:HGNC Symbol;Acc:HGNC:8877]	5213	A0A024R0Y5	A0A024R0Y5
-0.150639	4.02534	-2.67391	0.0146044	0.304379	ENSG00000105612.8	FALSE	ENSG00000105612	19	DNASE2	protein_coding	1955	deoxyribonuclease 2, lysosomal [Source:HGNC Symbol;Acc:HGNC:2960]	1777	A0A024R7F4	A0A024R7F4
0.415772	2.21417	2.67319	0.0146273	0.304379	ENSG00000198039.11	FALSE	ENSG00000198039	7	ZNF273	protein_coding	3757	zinc finger protein 273 [Source:HGNC Symbol;Acc:HGNC:13067]	10793	Q14593	Q14593
0.161443	6.22068	2.66975	0.0147372	0.306178	ENSG00000166848.5	FALSE	ENSG00000166848	16	TERF2IP	protein_coding	2118	TERF2 interacting protein [Source:HGNC Symbol;Acc:HGNC:19246]	54386	Q9NYB0	Q9NYB0
-0.211654	4.93758	-2.66482	0.0148966	0.306768	ENSG00000187051.8	FALSE	ENSG00000187051	22	RPS19BP1	protein_coding	2801	ribosomal protein S19 binding protein 1 [Source:HGNC Symbol;Acc:HGNC:28749]	91582	A0A024R1T1	A0A024R1T1
0.326401	3.16708	2.6634	0.0149427	0.306768	ENSG00000221890.3	FALSE	ENSG00000221890	22	NPTXR	protein_coding	5784	neuronal pentraxin receptor [Source:HGNC Symbol;Acc:HGNC:7954]	23467	O95502	O95502
0.285126	3.80473	2.66233	0.0149774	0.306768	ENSG00000138346.14	FALSE	ENSG00000138346	10	DNA2	protein_coding	4208	DNA replication helicase/nuclease 2 [Source:HGNC Symbol;Acc:HGNC:2939]	1763	P51530	P51530
-0.79732	1.05831	-2.6619	0.0149916	0.306768	ENSG00000140297.12	FALSE	ENSG00000140297	15	GCNT3	protein_coding	4933	glucosaminyl _N-acetyl_ transferase 3, mucin type [Source:HGNC Symbol;Acc:HGNC:4205]	9245	A0A024R5T9	A0A024R5T9
0.203155	4.56262	2.66117	0.0150154	0.306768	ENSG00000167202.11	FALSE	ENSG00000167202	15	TBC1D2B	protein_coding	6086	TBC1 domain family member 2B [Source:HGNC Symbol;Acc:HGNC:29183]	23102	Q9UPU7	Q9UPU7
-0.158377	5.52923	-2.6603	0.015044	0.306768	ENSG00000179222.17	FALSE	ENSG00000179222	X	MAGED1	protein_coding	5418	MAGE family member D1 [Source:HGNC Symbol;Acc:HGNC:6813]	9500	Q9Y5V3	Q9Y5V3
-0.196115	4.40201	-2.66018	0.0150476	0.306768	ENSG00000137124.7	FALSE	ENSG00000137124	9	ALDH1B1	protein_coding	3066	aldehyde dehydrogenase 1 family member B1 [Source:HGNC Symbol;Acc:HGNC:407]	219	P30837	P30837
-0.406791	2.63775	-2.66017	0.0150482	0.306768	ENSG00000167748.10	FALSE	ENSG00000167748	19	KLK1	protein_coding	1854	kallikrein 1 [Source:HGNC Symbol;Acc:HGNC:6357]	3816	A0A1R3UCD2	A0A1R3UCD2
-0.593258	2.44498	-2.65947	0.0150709	0.306768	ENSG00000118707.9	FALSE	ENSG00000118707	20	TGIF2	protein_coding	3432	TGFB induced factor homeobox 2 [Source:HGNC Symbol;Acc:HGNC:15764]	60436	Q9GZN2	Q9GZN2
-0.337176	3.14093	-2.65917	0.0150807	0.306768	ENSG00000239264.8	FALSE	ENSG00000239264	6	TXNDC5	protein_coding	2964	thioredoxin domain containing 5 [Source:HGNC Symbol;Acc:HGNC:21073]	81567	A0A024QZV0	A0A024QZV0
-0.510446	2.95553	-2.65916	0.0150812	0.306768	ENSG00000162227.7	FALSE	ENSG00000162227	11	TAF6L	protein_coding	2116	TATA-box binding protein associated factor 6 like [Source:HGNC Symbol;Acc:HGNC:17305]	10629	A0A024R5A7	A0A024R5A7
-0.307549	3.92546	-2.65885	0.0150914	0.306768	ENSG00000132434.9	FALSE	ENSG00000132434	7	LANCL2	protein_coding	4353	LanC like 2 [Source:HGNC Symbol;Acc:HGNC:6509]	55915	B3KTN5	B3KTN5
-0.191102	5.5101	-2.65879	0.0150932	0.306768	ENSG00000184117.11	FALSE	ENSG00000184117	22	NIPSNAP1	protein_coding	2237	nipsnap homolog 1 [Source:HGNC Symbol;Acc:HGNC:7827]	8508	B4DQI7	B4DQI7
0.69425	0.683142	2.65784	0.0151248	0.306768	ENSG00000282988.2	FALSE	ENSG00000282988	6	AL031777.3	protein_coding	1637	novel protein	#N/A	#N/A	#N/A
-0.157326	6.57534	-2.65767	0.0151303	0.306768	ENSG00000004478.7	FALSE	ENSG00000004478	12	FKBP4	protein_coding	3732	FK506 binding protein 4 [Source:HGNC Symbol;Acc:HGNC:3720]	2288	Q02790	Q02790
-0.192838	5.4646	-2.65734	0.0151412	0.306768	ENSG00000146733.13	FALSE	ENSG00000146733	7	PSPH	protein_coding	2178	phosphoserine phosphatase [Source:HGNC Symbol;Acc:HGNC:9577]	5723	A0A024RDL3	A0A024RDL3
-0.247822	5.0964	-2.65542	0.0152046	0.307273	ENSG00000139629.15	FALSE	ENSG00000139629	12	GALNT6	protein_coding	5207	polypeptide N-acetylgalactosaminyltransferase 6 [Source:HGNC Symbol;Acc:HGNC:4128]	11226	Q8NCL4	Q8NCL4
-0.147402	6.18169	-2.65516	0.0152132	0.307273	ENSG00000126432.13	FALSE	ENSG00000126432	11	PRDX5	protein_coding	893	peroxiredoxin 5 [Source:HGNC Symbol;Acc:HGNC:9355]	25824	P30044	P30044
0.282192	3.70245	2.65307	0.0152822	0.307792	ENSG00000125629.14	FALSE	ENSG00000125629	2	INSIG2	protein_coding	3185	insulin induced gene 2 [Source:HGNC Symbol;Acc:HGNC:20452]	51141	A0A024RAI2	A0A024RAI2
0.173572	5.62631	2.65296	0.0152859	0.307792	ENSG00000151503.12	FALSE	ENSG00000151503	11	NCAPD3	protein_coding	5539	non-SMC condensin II complex subunit D3 [Source:HGNC Symbol;Acc:HGNC:28952]	23310	P42695	P42695
-0.132828	5.62568	-2.65115	0.0153465	0.308535	ENSG00000198301.11	FALSE	ENSG00000198301	4	SDAD1	protein_coding	3080	SDA1 domain containing 1 [Source:HGNC Symbol;Acc:HGNC:25537]	55153	B4DT66	B4DT66
-0.258576	4.71308	-2.65014	0.0153802	0.308738	ENSG00000182580.2	FALSE	ENSG00000182580	3	EPHB3	protein_coding	4236	EPH receptor B3 [Source:HGNC Symbol;Acc:HGNC:3394]	2049	P54753	P54753
-0.148153	4.75926	-2.64774	0.0154605	0.309713	ENSG00000136158.11	FALSE	ENSG00000136158	13	SPRY2	protein_coding	2708	sprouty RTK signaling antagonist 2 [Source:HGNC Symbol;Acc:HGNC:11270]	10253	O43597	O43597
0.334314	3.18291	2.64728	0.0154762	0.309713	ENSG00000139190.16	FALSE	ENSG00000139190	12	VAMP1	protein_coding	3449	vesicle associated membrane protein 1 [Source:HGNC Symbol;Acc:HGNC:12642]	6843	F5GZV7	F5GZV7
0.96975	-1.27698	2.64543	0.0155385	0.310484	ENSG00000271079.1	FALSE	ENSG00000271079	7	CTAGE15	protein_coding	2587	CTAGE family member 15 [Source:HGNC Symbol;Acc:HGNC:37295]	441294	A4D2H0	A4D2H0
0.291249	3.69925	2.64186	0.0156594	0.312115	ENSG00000162694.13	FALSE	ENSG00000162694	1	EXTL2	protein_coding	3985	exostosin like glycosyltransferase 2 [Source:HGNC Symbol;Acc:HGNC:3516]	2135	Q9UBQ6	Q9UBQ6
-0.326161	2.87838	-2.64161	0.0156679	0.312115	ENSG00000102934.9	FALSE	ENSG00000102934	16	PLLP	protein_coding	7578	plasmolipin [Source:HGNC Symbol;Acc:HGNC:18553]	51090	A0A024R6T3	A0A024R6T3
-0.921945	0.855272	-2.64035	0.0157107	0.312493	ENSG00000143515.16	FALSE	ENSG00000143515	1	ATP8B2	protein_coding	5861	ATPase phospholipid transporting 8B2 [Source:HGNC Symbol;Acc:HGNC:13534]	57198	P98198	P98198
0.395429	1.81475	2.63745	0.01581	0.313518	ENSG00000139946.9	FALSE	ENSG00000139946	14	PELI2	protein_coding	5909	pellino E3 ubiquitin protein ligase family member 2 [Source:HGNC Symbol;Acc:HGNC:8828]	57161	Q9H716	Q9H716
-0.335512	1.86466	-2.63745	0.0158103	0.313518	ENSG00000075399.13	FALSE	ENSG00000075399	16	VPS9D1	protein_coding	2791	VPS9 domain containing 1 [Source:HGNC Symbol;Acc:HGNC:13526]	9605	Q9Y2B5	Q9Y2B5
-0.366873	2.94147	-2.63656	0.0158408	0.313649	ENSG00000188707.5	FALSE	ENSG00000188707	7	ZBED6CL	protein_coding	2933	ZBED6 C-terminal like [Source:HGNC Symbol;Acc:HGNC:21720]	113763	A0A090N8P6	A0A090N8P6
-0.299931	3.81268	-2.63265	0.0159757	0.315762	ENSG00000165905.17	FALSE	ENSG00000165905	11	LARGE2	protein_coding	2528	LARGE xylosyl- and glucuronyltransferase 2 [Source:HGNC Symbol;Acc:HGNC:16522]	120071	Q8N3Y3	Q8N3Y3
-0.231177	4.7892	-2.63207	0.0159959	0.315762	ENSG00000149503.12	FALSE	ENSG00000149503	11	INCENP	protein_coding	3964	inner centromere protein [Source:HGNC Symbol;Acc:HGNC:6058]	3619	Q9NQS7	Q9NQS7
0.365174	3.07776	2.63106	0.0160308	0.315951	ENSG00000111247.14	FALSE	ENSG00000111247	12	RAD51AP1	protein_coding	2235	RAD51 associated protein 1 [Source:HGNC Symbol;Acc:HGNC:16956]	10635	Q96B01	Q96B01
0.176408	3.75992	2.6304	0.0160538	0.315951	ENSG00000141452.9	FALSE	ENSG00000141452	18	RMC1	protein_coding	2162	regulator of MON1-CCZ1 [Source:HGNC Symbol;Acc:HGNC:24326]	29919	A0A087WZD4	A0A087WZD4
0.492145	2.32444	2.62747	0.0161562	0.317488	ENSG00000171241.8	FALSE	ENSG00000171241	16	SHCBP1	protein_coding	3461	SHC binding and spindle associated 1 [Source:HGNC Symbol;Acc:HGNC:29547]	79801	A0A024R6R1	A0A024R6R1
0.177395	7.06378	2.62668	0.0161841	0.317557	ENSG00000146247.13	FALSE	ENSG00000146247	6	PHIP	protein_coding	10460	pleckstrin homology domain interacting protein [Source:HGNC Symbol;Acc:HGNC:15673]	55023	Q8WWQ0	Q8WWQ0
0.35563	3.97788	2.62149	0.0163672	0.318277	ENSG00000183856.10	FALSE	ENSG00000183856	1	IQGAP3	protein_coding	5988	IQ motif containing GTPase activating protein 3 [Source:HGNC Symbol;Acc:HGNC:20669]	128239	Q86VI3	Q86VI3
0.189356	4.99709	2.61986	0.016425	0.318277	ENSG00000099246.16	FALSE	ENSG00000099246	10	RAB18	protein_coding	4931	RAB18, member RAS oncogene family [Source:HGNC Symbol;Acc:HGNC:14244]	22931	Q9NP72	Q9NP72
0.19431	5.09109	2.61981	0.0164268	0.318277	ENSG00000130024.14	FALSE	ENSG00000130024	6	PHF10	protein_coding	4395	PHD finger protein 10 [Source:HGNC Symbol;Acc:HGNC:18250]	55274	Q8WUB8	Q8WUB8
0.170135	4.54612	2.61936	0.0164429	0.318277	ENSG00000131508.15	FALSE	ENSG00000131508	5	UBE2D2	protein_coding	2702	ubiquitin conjugating enzyme E2 D2 [Source:HGNC Symbol;Acc:HGNC:12475]	7322	P62837	P62837
-0.186603	4.49436	-2.61844	0.0164756	0.318277	ENSG00000131788.15	FALSE	ENSG00000131788	1	PIAS3	protein_coding	2901	protein inhibitor of activated STAT 3 [Source:HGNC Symbol;Acc:HGNC:16861]	10401	B3KNI3	B3KNI3
0.203329	5.55331	2.61806	0.0164891	0.318277	ENSG00000134243.11	FALSE	ENSG00000134243	1	SORT1	protein_coding	7028	sortilin 1 [Source:HGNC Symbol;Acc:HGNC:11186]	6272	Q99523	Q99523
0.178312	4.71502	2.6167	0.0165379	0.318277	ENSG00000108474.16	FALSE	ENSG00000108474	17	PIGL	protein_coding	2160	phosphatidylinositol glycan anchor biosynthesis class L [Source:HGNC Symbol;Acc:HGNC:8966]	9487	Q9Y2B2	Q9Y2B2
-0.19873	4.37367	-2.61647	0.016546	0.318277	ENSG00000163882.9	FALSE	ENSG00000163882	3	POLR2H	protein_coding	1802	RNA polymerase II subunit H [Source:HGNC Symbol;Acc:HGNC:9195]	5437	P52434	P52434
0.154644	1.12111	2.61632	0.0165515	0.318277	ENSG00000163735.6	FALSE	ENSG00000163735	4	CXCL5	protein_coding	2538	C-X-C motif chemokine ligand 5 [Source:HGNC Symbol;Acc:HGNC:10642]	6374	P42830	P42830
0.190211	6.05901	2.61539	0.0165847	0.318277	ENSG00000104093.13	FALSE	ENSG00000104093	15	DMXL2	protein_coding	10672	Dmx like 2 [Source:HGNC Symbol;Acc:HGNC:2938]	23312	Q8TDJ6	Q8TDJ6
-0.956981	0.330543	-2.61499	0.0165994	0.318277	ENSG00000117013.15	FALSE	ENSG00000117013	1	KCNQ4	protein_coding	4297	potassium voltage-gated channel subfamily Q member 4 [Source:HGNC Symbol;Acc:HGNC:6298]	9132	B3KQH8	B3KQH8
0.23472	5.2855	2.61371	0.0166454	0.318277	ENSG00000011426.10	FALSE	ENSG00000011426	7	ANLN	protein_coding	4787	anillin actin binding protein [Source:HGNC Symbol;Acc:HGNC:14082]	54443	Q9NQW6	Q9NQW6
0.187746	7.31882	2.61321	0.0166634	0.318277	ENSG00000120708.16	FALSE	ENSG00000120708	5	TGFBI	protein_coding	4661	transforming growth factor beta induced [Source:HGNC Symbol;Acc:HGNC:11771]	7045	A0A0S2Z4Q2	A0A0S2Z4Q2
-0.165366	7.99527	-2.61319	0.016664	0.318277	ENSG00000112715.21	FALSE	ENSG00000112715	6	VEGFA	protein_coding	12167	vascular endothelial growth factor A [Source:HGNC Symbol;Acc:HGNC:12680]	7422	A0A087WUD8	A0A087WUD8
-0.191427	5.05433	-2.61312	0.0166666	0.318277	ENSG00000242372.7	FALSE	ENSG00000242372	20	EIF6	protein_coding	1289	eukaryotic translation initiation factor 6 [Source:HGNC Symbol;Acc:HGNC:6159]	3692	P56537	P56537
-0.439547	1.26944	-2.613	0.0166709	0.318277	ENSG00000161677.11	FALSE	ENSG00000161677	19	JOSD2	protein_coding	996	Josephin domain containing 2 [Source:HGNC Symbol;Acc:HGNC:28853]	126119	A0A024R4G2	A0A024R4G2
0.251759	5.47222	2.61215	0.0167017	0.318277	ENSG00000163950.12	FALSE	ENSG00000163950	4	SLBP	protein_coding	1977	stem-loop binding protein [Source:HGNC Symbol;Acc:HGNC:10904]	7884	B3KST9	B3KST9
-0.139294	7.47866	-2.61206	0.0167048	0.318277	ENSG00000170144.20	FALSE	ENSG00000170144	2	HNRNPA3	protein_coding	5688	heterogeneous nuclear ribonucleoprotein A3 [Source:HGNC Symbol;Acc:HGNC:24941]	220988	B4DDB6	B4DDB6
-0.639923	-0.0364594	-2.6107	0.0167541	0.318277	ENSG00000162552.14	FALSE	ENSG00000162552	1	WNT4	protein_coding	3845	Wnt family member 4 [Source:HGNC Symbol;Acc:HGNC:12783]	54361	P56705	P56705
0.273671	4.10426	2.61046	0.0167627	0.318277	ENSG00000164096.12	FALSE	ENSG00000164096	4	C4ORF3	protein_coding	2960	chromosome 4 open reading frame 3 [Source:HGNC Symbol;Acc:HGNC:19225]	401152	Q8WVX3	Q8WVX3
-0.229383	4.79052	-2.60912	0.0168114	0.318277	ENSG00000110697.12	FALSE	ENSG00000110697	11	PITPNM1	protein_coding	4225	phosphatidylinositol transfer protein membrane associated 1 [Source:HGNC Symbol;Acc:HGNC:9003]	9600	B2R787	B2R787
-0.259534	3.62938	-2.60871	0.0168264	0.318277	ENSG00000101052.12	FALSE	ENSG00000101052	20	IFT52	protein_coding	1757	intraflagellar transport 52 [Source:HGNC Symbol;Acc:HGNC:15901]	51098	Q9Y366	Q9Y366
0.391598	2.65737	2.60862	0.0168297	0.318277	ENSG00000186638.16	FALSE	ENSG00000186638	9	KIF24	protein_coding	6131	kinesin family member 24 [Source:HGNC Symbol;Acc:HGNC:19916]	347240	Q5T7B8	Q5T7B8
0.223398	3.20531	2.60502	0.0169615	0.318277	ENSG00000163291.14	FALSE	ENSG00000163291	4	PAQR3	protein_coding	9811	progestin and adipoQ receptor family member 3 [Source:HGNC Symbol;Acc:HGNC:30130]	152559	Q6TCH7	Q6TCH7
-0.921545	0.492227	-2.60487	0.0169666	0.318277	ENSG00000225614.2	FALSE	ENSG00000225614	16	ZNF469	protein_coding	13279	zinc finger protein 469 [Source:HGNC Symbol;Acc:HGNC:23216]	84627	H3BS19	H3BS19
-0.122882	5.40476	-2.60386	0.0170039	0.318277	ENSG00000213995.11	FALSE	ENSG00000213995	13	NAXD	protein_coding	2659	NAD_P_HX dehydratase [Source:HGNC Symbol;Acc:HGNC:25576]	55739	Q8IW45	Q8IW45
0.231845	4.8009	2.60375	0.017008	0.318277	ENSG00000103995.13	FALSE	ENSG00000103995	15	CEP152	protein_coding	5635	centrosomal protein 152 [Source:HGNC Symbol;Acc:HGNC:29298]	22995	O94986	O94986
0.192866	4.53125	2.60299	0.017036	0.318277	ENSG00000168496.3	FALSE	ENSG00000168496	11	FEN1	protein_coding	2296	flap structure-specific endonuclease 1 [Source:HGNC Symbol;Acc:HGNC:3650]	2237	P39748	P39748
-0.140625	6.8855	-2.60278	0.0170437	0.318277	ENSG00000079459.12	FALSE	ENSG00000079459	8	FDFT1	protein_coding	2660	farnesyl-diphosphate farnesyltransferase 1 [Source:HGNC Symbol;Acc:HGNC:3629]	2222	P37268	P37268
0.336906	3.3962	2.60256	0.0170519	0.318277	ENSG00000086300.15	FALSE	ENSG00000086300	7	SNX10	protein_coding	2613	sorting nexin 10 [Source:HGNC Symbol;Acc:HGNC:14974]	29887	A0A024RA70	A0A024RA70
0.22695	5.14955	2.60233	0.0170603	0.318277	ENSG00000155090.14	FALSE	ENSG00000155090	8	KLF10	protein_coding	3659	Kruppel like factor 10 [Source:HGNC Symbol;Acc:HGNC:11810]	7071	Q13118	Q13118
-0.171012	5.80346	-2.60203	0.0170715	0.318277	ENSG00000101076.16	FALSE	ENSG00000101076	20	HNF4A	protein_coding	6445	hepatocyte nuclear factor 4 alpha [Source:HGNC Symbol;Acc:HGNC:5024]	3172	F1D8T1	F1D8T1
0.153498	4.56651	2.60142	0.0170937	0.318277	ENSG00000079387.13	FALSE	ENSG00000079387	12	SENP1	protein_coding	4967	SUMO specific peptidase 1 [Source:HGNC Symbol;Acc:HGNC:17927]	29843	Q6N001	Q6N001
0.290865	3.54903	2.60117	0.0171032	0.318277	ENSG00000143061.17	FALSE	ENSG00000143061	1	IGSF3	protein_coding	7326	immunoglobulin superfamily member 3 [Source:HGNC Symbol;Acc:HGNC:5950]	3321	O75054	O75054
-0.207929	4.5579	-2.6007	0.0171204	0.318277	ENSG00000107672.14	FALSE	ENSG00000107672	10	NSMCE4A	protein_coding	2399	NSE4 homolog A, SMC5-SMC6 complex component [Source:HGNC Symbol;Acc:HGNC:25935]	54780	Q9NXX6	Q9NXX6
-0.728765	2.45562	-2.6003	0.0171352	0.318277	ENSG00000148082.9	FALSE	ENSG00000148082	9	SHC3	protein_coding	9768	SHC adaptor protein 3 [Source:HGNC Symbol;Acc:HGNC:18181]	53358	Q92529	Q92529
0.303859	3.4594	2.59973	0.0171563	0.318277	ENSG00000131470.14	FALSE	ENSG00000131470	17	PSMC3IP	protein_coding	1416	PSMC3 interacting protein [Source:HGNC Symbol;Acc:HGNC:17928]	29893	K7ERB6	K7ERB6
-0.199858	4.47566	-2.5995	0.017165	0.318277	ENSG00000186350.10	FALSE	ENSG00000186350	9	RXRA	protein_coding	5770	retinoid X receptor alpha [Source:HGNC Symbol;Acc:HGNC:10477]	6256	Q6P3U7	Q6P3U7
-0.180777	6.24817	-2.59935	0.0171706	0.318277	ENSG00000198758.10	FALSE	ENSG00000198758	1	EPS8L3	protein_coding	2325	EPS8 like 3 [Source:HGNC Symbol;Acc:HGNC:21297]	79574	Q8TE67	Q8TE67
0.140209	6.08079	2.5967	0.017269	0.319648	ENSG00000076067.12	FALSE	ENSG00000076067	12	RBMS2	protein_coding	8382	RNA binding motif single stranded interacting protein 2 [Source:HGNC Symbol;Acc:HGNC:9909]	5939	Q15434	Q15434
-0.151525	6.47151	-2.5939	0.0173737	0.321132	ENSG00000132002.7	FALSE	ENSG00000132002	19	DNAJB1	protein_coding	2264	DnaJ heat shock protein family _Hsp40_ member B1 [Source:HGNC Symbol;Acc:HGNC:5270]	3337	P25685	P25685
0.125344	4.70582	2.59205	0.0174436	0.321576	ENSG00000219481.10	FALSE	ENSG00000219481	1	NBPF1	protein_coding	5932	NBPF member 1 [Source:HGNC Symbol;Acc:HGNC:26088]	55672	Q3BBV0	Q3BBV0
-0.268639	3.75092	-2.59104	0.0174817	0.321576	ENSG00000168268.10	FALSE	ENSG00000168268	3	NT5DC2	protein_coding	2047	5'-nucleotidase domain containing 2 [Source:HGNC Symbol;Acc:HGNC:25717]	64943	Q9H857	Q9H857
0.891361	0.557756	2.5909	0.017487	0.321576	ENSG00000078018.19	FALSE	ENSG00000078018	2	MAP2	protein_coding	9711	microtubule associated protein 2 [Source:HGNC Symbol;Acc:HGNC:6839]	4133	P11137	P11137
-0.397104	1.22261	-2.59024	0.0175118	0.321576	ENSG00000162572.20	FALSE	ENSG00000162572	1	SCNN1D	protein_coding	3475	sodium channel epithelial 1 delta subunit [Source:HGNC Symbol;Acc:HGNC:10601]	6339	A6NNF7	A6NNF7
-0.115467	6.73567	-2.59	0.0175208	0.321576	ENSG00000175029.16	FALSE	ENSG00000175029	10	CTBP2	protein_coding	6939	C-terminal binding protein 2 [Source:HGNC Symbol;Acc:HGNC:2495]	1488	P56545	P56545
0.496355	1.98003	2.58882	0.0175657	0.321947	ENSG00000168078.9	FALSE	ENSG00000168078	8	PBK	protein_coding	2118	PDZ binding kinase [Source:HGNC Symbol;Acc:HGNC:18282]	55872	Q96KB5	Q96KB5
-0.283542	4.66564	-2.58791	0.0176	0.322124	ENSG00000125968.8	FALSE	ENSG00000125968	20	ID1	protein_coding	1233	inhibitor of DNA binding 1, HLH protein [Source:HGNC Symbol;Acc:HGNC:5360]	3397	P41134	P41134
-0.262596	2.4772	-2.58516	0.0177048	0.323589	ENSG00000163611.11	FALSE	ENSG00000163611	3	SPICE1	protein_coding	5417	spindle and centriole associated protein 1 [Source:HGNC Symbol;Acc:HGNC:25083]	152185	Q8N0Z3	Q8N0Z3
-0.97639	-0.295147	-2.58174	0.0178359	0.324805	ENSG00000233041.8	FALSE	ENSG00000233041	15	PHGR1	protein_coding	571	proline, histidine and glycine rich 1 [Source:HGNC Symbol;Acc:HGNC:37226]	644844	A0A1L2EC20	A0A1L2EC20
0.159938	5.3656	2.58162	0.0178404	0.324805	ENSG00000115825.9	FALSE	ENSG00000115825	2	PRKD3	protein_coding	6111	protein kinase D3 [Source:HGNC Symbol;Acc:HGNC:9408]	23683	O94806	O94806
-0.729379	1.85801	-2.58148	0.0178459	0.324805	ENSG00000255823.4	FALSE	ENSG00000255823	11	MTRNR2L8	protein_coding	1303	MT-RNR2 like 8 [Source:HGNC Symbol;Acc:HGNC:37165]	100463486	P0CJ75	P0CJ75
-0.164469	7.18696	-2.58074	0.0178745	0.324873	ENSG00000079805.16	FALSE	ENSG00000079805	19	DNM2	protein_coding	5651	dynamin 2 [Source:HGNC Symbol;Acc:HGNC:2974]	1785	P50570	P50570
-0.387713	2.31501	-2.57892	0.0179446	0.325694	ENSG00000198890.8	FALSE	ENSG00000198890	1	PRMT6	protein_coding	2715	protein arginine methyltransferase 6 [Source:HGNC Symbol;Acc:HGNC:18241]	55170	Q96LA8	Q96LA8
0.554581	1.16251	2.57824	0.0179711	0.325723	ENSG00000139344.7	FALSE	ENSG00000139344	12	AMDHD1	protein_coding	2260	amidohydrolase domain containing 1 [Source:HGNC Symbol;Acc:HGNC:28577]	144193	B3KVC5	B3KVC5
0.226204	3.58536	2.57676	0.0180284	0.326007	ENSG00000165675.16	FALSE	ENSG00000165675	X	ENOX2	protein_coding	4263	ecto-NOX disulfide-thiol exchanger 2 [Source:HGNC Symbol;Acc:HGNC:2259]	10495	Q16206	Q16206
0.953138	-0.863542	2.57645	0.0180407	0.326007	ENSG00000117643.14	FALSE	ENSG00000117643	1	MAN1C1	protein_coding	4647	mannosidase alpha class 1C member 1 [Source:HGNC Symbol;Acc:HGNC:19080]	57134	Q59G34	Q59G34
-0.3362	3.01451	-2.57533	0.0180844	0.326007	ENSG00000037897.16	FALSE	ENSG00000037897	12	METTL1	protein_coding	2066	methyltransferase like 1 [Source:HGNC Symbol;Acc:HGNC:7030]	4234	Q9UBP6	Q9UBP6
-0.18317	5.14527	-2.5749	0.0181008	0.326007	ENSG00000125733.17	FALSE	ENSG00000125733	19	TRIP10	protein_coding	2249	thyroid hormone receptor interactor 10 [Source:HGNC Symbol;Acc:HGNC:12304]	9322	Q15642	Q15642
0.140624	6.51942	2.574	0.0181362	0.326007	ENSG00000173889.15	FALSE	ENSG00000173889	3	PHC3	protein_coding	12666	polyhomeotic homolog 3 [Source:HGNC Symbol;Acc:HGNC:15682]	80012	B4E2T1	B4E2T1
-0.166953	7.21321	-2.57368	0.0181486	0.326007	ENSG00000163902.11	FALSE	ENSG00000163902	3	RPN1	protein_coding	2314	ribophorin I [Source:HGNC Symbol;Acc:HGNC:10381]	6184	P04843	P04843
-0.191026	4.05605	-2.57335	0.0181614	0.326007	ENSG00000134285.10	FALSE	ENSG00000134285	12	FKBP11	protein_coding	4957	FK506 binding protein 11 [Source:HGNC Symbol;Acc:HGNC:18624]	51303	E9PAR0	E9PAR0
0.450238	1.10881	2.56937	0.0183179	0.327629	ENSG00000160050.14	FALSE	ENSG00000160050	1	CCDC28B	protein_coding	1415	coiled-coil domain containing 28B [Source:HGNC Symbol;Acc:HGNC:28163]	79140	Q9BUN5	Q9BUN5
0.294795	5.14415	2.56936	0.0183182	0.327629	ENSG00000120885.21	FALSE	ENSG00000120885	8	CLU	protein_coding	3080	clusterin [Source:HGNC Symbol;Acc:HGNC:2095]	1191	P10909	P10909
0.196106	6.18629	2.56914	0.0183269	0.327629	ENSG00000114331.13	FALSE	ENSG00000114331	3	ACAP2	protein_coding	7160	ArfGAP with coiled-coil, ankyrin repeat and PH domains 2 [Source:HGNC Symbol;Acc:HGNC:16469]	23527	Q15057	Q15057
-0.586907	-0.309475	-2.56686	0.018417	0.328505	ENSG00000132000.12	FALSE	ENSG00000132000	19	PODNL1	protein_coding	3331	podocan like 1 [Source:HGNC Symbol;Acc:HGNC:26275]	79883	B7Z3M0	B7Z3M0
-0.199044	6.51251	-2.56663	0.0184262	0.328505	ENSG00000196365.11	FALSE	ENSG00000196365	19	LONP1	protein_coding	3236	lon peptidase 1, mitochondrial [Source:HGNC Symbol;Acc:HGNC:9479]	9361	P36776	P36776
-0.15405	10.0028	-2.56496	0.0184924	0.328764	ENSG00000204628.11	FALSE	ENSG00000204628	5	RACK1	protein_coding	1651	receptor for activated C kinase 1 [Source:HGNC Symbol;Acc:HGNC:4399]	10399	E9KL35	E9KL35
0.211813	4.44695	2.56411	0.0185263	0.328764	ENSG00000239305.6	FALSE	ENSG00000239305	2	RNF103	protein_coding	4560	ring finger protein 103 [Source:HGNC Symbol;Acc:HGNC:12859]	7844	O00237	O00237
0.728023	0.845927	2.5641	0.018527	0.328764	ENSG00000166507.17	FALSE	ENSG00000166507	10	NDST2	protein_coding	3749	N-deacetylase and N-sulfotransferase 2 [Source:HGNC Symbol;Acc:HGNC:7681]	8509	P52849	P52849
-0.20937	5.0025	-2.56319	0.0185633	0.328764	ENSG00000128928.8	FALSE	ENSG00000128928	15	IVD	protein_coding	4251	isovaleryl-CoA dehydrogenase [Source:HGNC Symbol;Acc:HGNC:6186]	3712	P26440	P26440
-0.225415	6.08026	-2.5631	0.0185666	0.328764	ENSG00000129128.12	FALSE	ENSG00000129128	4	SPCS3	protein_coding	4571	signal peptidase complex subunit 3 [Source:HGNC Symbol;Acc:HGNC:26212]	60559	P61009	P61009
-0.452314	-0.1544	-2.56106	0.0186484	0.328925	ENSG00000170955.9	FALSE	ENSG00000170955	11	CAVIN3	protein_coding	1174	caveolae associated protein 3 [Source:HGNC Symbol;Acc:HGNC:9400]	112464	Q969G5	Q969G5
-0.286251	2.09227	-2.56097	0.0186521	0.328925	ENSG00000156127.6	FALSE	ENSG00000156127	14	BATF	protein_coding	980	basic leucine zipper ATF-like transcription factor [Source:HGNC Symbol;Acc:HGNC:958]	10538	Q16520	Q16520
-0.163319	4.6281	-2.56047	0.018672	0.328925	ENSG00000149923.13	FALSE	ENSG00000149923	16	PPP4C	protein_coding	1490	protein phosphatase 4 catalytic subunit [Source:HGNC Symbol;Acc:HGNC:9319]	5531	A0A024R625	A0A024R625
-1.0263	-0.722622	-2.56036	0.0186763	0.328925	ENSG00000173212.4	FALSE	ENSG00000173212	1	MAB21L3	protein_coding	3229	mab-21 like 3 [Source:HGNC Symbol;Acc:HGNC:26787]	126868	Q8N8X9	Q8N8X9
-0.148018	5.00476	-2.55912	0.0187266	0.329055	ENSG00000131871.14	FALSE	ENSG00000131871	15	SELENOS	protein_coding	2444	selenoprotein S [Source:HGNC Symbol;Acc:HGNC:30396]	55829	Q9BQE4	Q9BQE4
0.150925	6.17961	2.55893	0.0187341	0.329055	ENSG00000090686.15	FALSE	ENSG00000090686	1	USP48	protein_coding	4595	ubiquitin specific peptidase 48 [Source:HGNC Symbol;Acc:HGNC:18533]	84196	Q86UV5	Q86UV5
0.242517	4.4218	2.55733	0.0187987	0.329747	ENSG00000174796.12	FALSE	ENSG00000174796	4	THAP6	protein_coding	3549	THAP domain containing 6 [Source:HGNC Symbol;Acc:HGNC:23189]	152815	Q8TBB0	Q8TBB0
0.161044	5.17815	2.5554	0.0188768	0.32996	ENSG00000025772.7	FALSE	ENSG00000025772	20	TOMM34	protein_coding	2062	translocase of outer mitochondrial membrane 34 [Source:HGNC Symbol;Acc:HGNC:15746]	10953	Q15785	Q15785
0.3031	4.3518	2.55539	0.0188774	0.32996	ENSG00000164305.18	FALSE	ENSG00000164305	4	CASP3	protein_coding	2673	caspase 3 [Source:HGNC Symbol;Acc:HGNC:1504]	836	P42574	P42574
-0.336478	2.90499	-2.55516	0.0188866	0.32996	ENSG00000153714.5	FALSE	ENSG00000153714	9	LURAP1L	protein_coding	1753	leucine rich adaptor protein 1 like [Source:HGNC Symbol;Acc:HGNC:31452]	286343	Q8IV03	Q8IV03
0.296764	2.34949	2.55342	0.0189573	0.330104	ENSG00000090674.15	FALSE	ENSG00000090674	19	MCOLN1	protein_coding	2253	mucolipin 1 [Source:HGNC Symbol;Acc:HGNC:13356]	57192	Q9GZU1	Q9GZU1
0.161616	5.5048	2.55322	0.0189656	0.330104	ENSG00000185920.15	FALSE	ENSG00000185920	9	PTCH1	protein_coding	10631	patched 1 [Source:HGNC Symbol;Acc:HGNC:9585]	5727	Q13635	Q13635
-0.138368	5.2646	-2.55296	0.0189762	0.330104	ENSG00000135930.13	FALSE	ENSG00000135930	2	EIF4E2	protein_coding	3525	eukaryotic translation initiation factor 4E family member 2 [Source:HGNC Symbol;Acc:HGNC:3293]	9470	O60573	O60573
-0.442925	1.30775	-2.55046	0.0190784	0.330104	ENSG00000137033.11	FALSE	ENSG00000137033	9	IL33	protein_coding	2641	interleukin 33 [Source:HGNC Symbol;Acc:HGNC:16028]	90865	O95760	O95760
-0.121525	5.98435	-2.54921	0.0191297	0.330104	ENSG00000171824.13	FALSE	ENSG00000171824	1	EXOSC10	protein_coding	2808	exosome component 10 [Source:HGNC Symbol;Acc:HGNC:9138]	5394	Q01780	Q01780
-0.220568	2.68233	-2.54909	0.0191345	0.330104	ENSG00000197355.10	FALSE	ENSG00000197355	9	UAP1L1	protein_coding	4412	UDP-N-acetylglucosamine pyrophosphorylase 1 like 1 [Source:HGNC Symbol;Acc:HGNC:28082]	91373	Q3KQV9	Q3KQV9
-0.702566	-0.473066	-2.54894	0.0191405	0.330104	ENSG00000111664.10	FALSE	ENSG00000111664	12	GNB3	protein_coding	2869	G protein subunit beta 3 [Source:HGNC Symbol;Acc:HGNC:4400]	2784	E9PCP0	E9PCP0
0.128673	7.2922	2.54889	0.0191428	0.330104	ENSG00000119596.17	FALSE	ENSG00000119596	14	YLPM1	protein_coding	7108	YLP motif containing 1 [Source:HGNC Symbol;Acc:HGNC:17798]	56252	P49750	P49750
0.381613	3.77448	2.54843	0.0191617	0.330104	ENSG00000058668.14	FALSE	ENSG00000058668	1	ATP2B4	protein_coding	8968	ATPase plasma membrane Ca2+ transporting 4 [Source:HGNC Symbol;Acc:HGNC:817]	493	P23634	P23634
-0.230358	5.35794	-2.54833	0.0191656	0.330104	ENSG00000148180.19	FALSE	ENSG00000148180	9	GSN	protein_coding	6454	gelsolin [Source:HGNC Symbol;Acc:HGNC:4620]	2934	P06396	P06396
-0.57757	1.07717	-2.54816	0.0191727	0.330104	ENSG00000166682.11	FALSE	ENSG00000166682	11	TMPRSS5	protein_coding	2340	transmembrane serine protease 5 [Source:HGNC Symbol;Acc:HGNC:14908]	80975	B7Z247	B7Z247
0.435915	3.00026	2.54668	0.019234	0.330166	ENSG00000165480.15	FALSE	ENSG00000165480	13	SKA3	protein_coding	2919	spindle and kinetochore associated complex subunit 3 [Source:HGNC Symbol;Acc:HGNC:20262]	221150	Q8IX90	Q8IX90
-0.158595	5.94398	-2.54637	0.0192468	0.330166	ENSG00000198722.14	FALSE	ENSG00000198722	9	UNC13B	protein_coding	14550	unc-13 homolog B [Source:HGNC Symbol;Acc:HGNC:12566]	10497	O14795	O14795
-0.195719	4.3814	-2.54623	0.0192523	0.330166	ENSG00000086504.16	FALSE	ENSG00000086504	16	MRPL28	protein_coding	2229	mitochondrial ribosomal protein L28 [Source:HGNC Symbol;Acc:HGNC:14484]	10573	Q13084	Q13084
0.360444	3.12137	2.54563	0.0192774	0.330166	ENSG00000126821.7	FALSE	ENSG00000126821	14	SGPP1	protein_coding	3312	sphingosine-1-phosphate phosphatase 1 [Source:HGNC Symbol;Acc:HGNC:17720]	81537	Q9BX95	Q9BX95
-0.125269	5.64677	-2.54467	0.0193169	0.33041	ENSG00000111667.13	FALSE	ENSG00000111667	12	USP5	protein_coding	3181	ubiquitin specific peptidase 5 [Source:HGNC Symbol;Acc:HGNC:12628]	8078	A0A140VJZ1	A0A140VJZ1
-0.147801	6.62432	-2.53969	0.0195244	0.333523	ENSG00000126602.10	FALSE	ENSG00000126602	16	TRAP1	protein_coding	2309	TNF receptor associated protein 1 [Source:HGNC Symbol;Acc:HGNC:16264]	10131	Q12931	Q12931
-0.139334	7.68295	-2.5373	0.0196247	0.334419	ENSG00000170889.13	FALSE	ENSG00000170889	19	RPS9	protein_coding	2384	ribosomal protein S9 [Source:HGNC Symbol;Acc:HGNC:10442]	6203	A0A024R4M0	A0A024R4M0
-0.123488	7.1557	-2.53628	0.0196679	0.334419	ENSG00000047849.21	FALSE	ENSG00000047849	3	MAP4	protein_coding	8920	microtubule associated protein 4 [Source:HGNC Symbol;Acc:HGNC:6862]	4134	P27816	P27816
-0.225684	6.02365	-2.53591	0.0196834	0.334419	ENSG00000169696.15	FALSE	ENSG00000169696	17	ASPSCR1	protein_coding	5503	ASPSCR1, UBX domain containing tether for SLC2A4 [Source:HGNC Symbol;Acc:HGNC:13825]	79058	Q9BZE9	Q9BZE9
0.781372	0.701131	2.53553	0.0196996	0.334419	ENSG00000153093.18	FALSE	ENSG00000153093	2	ACOXL	protein_coding	2714	acyl-CoA oxidase like [Source:HGNC Symbol;Acc:HGNC:25621]	55289	B4DU63	B4DU63
-1.50127	-1.66448	-2.53483	0.0197289	0.334419	ENSG00000172349.17	FALSE	ENSG00000172349	15	IL16	protein_coding	9616	interleukin 16 [Source:HGNC Symbol;Acc:HGNC:5980]	3603	Q14005	Q14005
-1.07745	-0.332394	-2.5348	0.0197304	0.334419	ENSG00000164898.12	FALSE	ENSG00000164898	7	FMC1	protein_coding	1210	formation of mitochondrial complex V assembly factor 1 homolog [Source:HGNC Symbol;Acc:HGNC:26946]	154791	Q96HJ9	Q96HJ9
0.38366	2.05515	2.53341	0.0197893	0.334983	ENSG00000182700.4	FALSE	ENSG00000182700	5	IGIP	protein_coding	3458	IgA inducing protein [Source:HGNC Symbol;Acc:HGNC:33847]	492311	A0A158RFU4	A0A158RFU4
0.191813	5.00714	2.53214	0.0198433	0.335463	ENSG00000167395.10	FALSE	ENSG00000167395	16	ZNF646	protein_coding	8118	zinc finger protein 646 [Source:HGNC Symbol;Acc:HGNC:29004]	9726	O15015	O15015
0.16427	6.63034	2.53149	0.0198706	0.33549	ENSG00000143384.12	FALSE	ENSG00000143384	1	MCL1	protein_coding	3932	MCL1, BCL2 family apoptosis regulator [Source:HGNC Symbol;Acc:HGNC:6943]	4170	A0A087WT64	A0A087WT64
0.170147	5.16026	2.53073	0.0199032	0.335606	ENSG00000134247.9	FALSE	ENSG00000134247	1	PTGFRN	protein_coding	6178	prostaglandin F2 receptor inhibitor [Source:HGNC Symbol;Acc:HGNC:9601]	5738	Q9P2B2	Q9P2B2
-0.368754	4.69975	-2.52817	0.0200129	0.33702	ENSG00000118513.18	FALSE	ENSG00000118513	6	MYB	protein_coding	3672	MYB proto-oncogene, transcription factor [Source:HGNC Symbol;Acc:HGNC:7545]	4602	P10242	P10242
-0.186564	5.35201	-2.52692	0.0200665	0.33702	ENSG00000137106.17	FALSE	ENSG00000137106	9	GRHPR	protein_coding	4762	glyoxylate and hydroxypyruvate reductase [Source:HGNC Symbol;Acc:HGNC:4570]	9380	Q9UBQ7	Q9UBQ7
-0.260449	3.42625	-2.52593	0.0201087	0.33702	ENSG00000173540.12	FALSE	ENSG00000173540	3	GMPPB	protein_coding	6108	GDP-mannose pyrophosphorylase B [Source:HGNC Symbol;Acc:HGNC:22932]	29925	Q9Y5P6	Q9Y5P6
-0.210119	4.39729	-2.52463	0.0201652	0.33702	ENSG00000183751.14	FALSE	ENSG00000183751	16	TBL3	protein_coding	6803	transducin beta like 3 [Source:HGNC Symbol;Acc:HGNC:11587]	10607	Q12788	Q12788
0.365192	2.27632	2.52179	0.020288	0.33702	ENSG00000149927.17	FALSE	ENSG00000149927	16	DOC2A	protein_coding	3749	double C2 domain alpha [Source:HGNC Symbol;Acc:HGNC:2985]	8448	Q14183	Q14183
-0.260265	3.59486	-2.52049	0.0203444	0.33702	ENSG00000188112.8	FALSE	ENSG00000188112	6	C6ORF132	protein_coding	6210	chromosome 6 open reading frame 132 [Source:HGNC Symbol;Acc:HGNC:21288]	647024	Q5T0Z8	Q5T0Z8
-0.22596	7.5268	-2.51964	0.0203814	0.33702	ENSG00000196878.14	FALSE	ENSG00000196878	1	LAMB3	protein_coding	4305	laminin subunit beta 3 [Source:HGNC Symbol;Acc:HGNC:6490]	3914	A0A0S2Z3R6	A0A0S2Z3R6
-0.117852	5.76208	-2.51914	0.0204033	0.33702	ENSG00000204138.12	FALSE	ENSG00000204138	1	PHACTR4	protein_coding	6190	phosphatase and actin regulator 4 [Source:HGNC Symbol;Acc:HGNC:25793]	65979	Q8IZ21	Q8IZ21
-0.154105	4.62479	-2.51902	0.0204086	0.33702	ENSG00000160410.14	FALSE	ENSG00000160410	19	SHKBP1	protein_coding	2363	SH3KBP1 binding protein 1 [Source:HGNC Symbol;Acc:HGNC:19214]	92799	Q8TBC3	Q8TBC3
0.155489	5.33259	2.51889	0.0204141	0.33702	ENSG00000084676.15	FALSE	ENSG00000084676	2	NCOA1	protein_coding	7405	nuclear receptor coactivator 1 [Source:HGNC Symbol;Acc:HGNC:7668]	8648	Q15788	Q15788
0.295776	3.45957	2.51833	0.0204389	0.33702	ENSG00000134574.11	FALSE	ENSG00000134574	11	DDB2	protein_coding	3101	damage specific DNA binding protein 2 [Source:HGNC Symbol;Acc:HGNC:2718]	1643	Q92466	Q92466
0.325356	4.27472	2.51811	0.0204483	0.33702	ENSG00000186063.12	FALSE	ENSG00000186063	1	AIDA	protein_coding	4050	axin interactor, dorsalization associated [Source:HGNC Symbol;Acc:HGNC:25761]	64853	Q96BJ3	Q96BJ3
-0.150378	5.43078	-2.51742	0.0204787	0.33702	ENSG00000135916.15	FALSE	ENSG00000135916	2	ITM2C	protein_coding	2078	integral membrane protein 2C [Source:HGNC Symbol;Acc:HGNC:6175]	81618	Q9NQX7	Q9NQX7
0.145892	5.45211	2.51659	0.020515	0.33702	ENSG00000170949.17	FALSE	ENSG00000170949	19	ZNF160	protein_coding	4688	zinc finger protein 160 [Source:HGNC Symbol;Acc:HGNC:12948]	90338	A0A024R4Q2	A0A024R4Q2
-0.195137	4.59207	-2.51637	0.0205245	0.33702	ENSG00000163703.17	FALSE	ENSG00000163703	3	CRELD1	protein_coding	2696	cysteine rich with EGF like domains 1 [Source:HGNC Symbol;Acc:HGNC:14630]	78987	Q96HD1	Q96HD1
-0.164518	5.38679	-2.51617	0.0205335	0.33702	ENSG00000107104.18	FALSE	ENSG00000107104	9	KANK1	protein_coding	7193	KN motif and ankyrin repeat domains 1 [Source:HGNC Symbol;Acc:HGNC:19309]	23189	Q14678	Q14678
-0.163541	6.64936	-2.51604	0.0205391	0.33702	ENSG00000100823.11	FALSE	ENSG00000100823	14	APEX1	protein_coding	1803	apurinic/apyrimidinic endodeoxyribonuclease 1 [Source:HGNC Symbol;Acc:HGNC:587]	328	P27695	P27695
-0.573883	0.94398	-2.51595	0.0205428	0.33702	ENSG00000180806.4	FALSE	ENSG00000180806	12	HOXC9	protein_coding	1516	homeobox C9 [Source:HGNC Symbol;Acc:HGNC:5130]	3225	A0A024RAZ6	A0A024RAZ6
0.38495	2.25385	2.51593	0.0205438	0.33702	ENSG00000168970.22	FALSE	ENSG00000168970	15	JMJD7-PLA2G4B	protein_coding	7227	JMJD7-PLA2G4B readthrough [Source:HGNC Symbol;Acc:HGNC:34449]	8681	P0C869	P0C869
-0.524686	1.664	-2.51555	0.0205608	0.33702	ENSG00000015413.9	FALSE	ENSG00000015413	16	DPEP1	protein_coding	1772	dipeptidase 1 [Source:HGNC Symbol;Acc:HGNC:3002]	1800	A0A140VJI3	A0A140VJI3
-0.29955	3.66091	-2.51457	0.0206038	0.33702	ENSG00000185561.9	FALSE	ENSG00000185561	17	TLCD2	protein_coding	5971	TLC domain containing 2 [Source:HGNC Symbol;Acc:HGNC:33522]	727910	A6NGC4	A6NGC4
-0.166704	4.67193	-2.51372	0.0206411	0.33702	ENSG00000125458.6	FALSE	ENSG00000125458	17	NT5C	protein_coding	1315	5', 3'-nucleotidase, cytosolic [Source:HGNC Symbol;Acc:HGNC:17144]	30833	Q8TCD5	Q8TCD5
0.221951	4.30156	2.51318	0.0206652	0.33702	ENSG00000214367.7	FALSE	ENSG00000214367	4	HAUS3	protein_coding	5620	HAUS augmin like complex subunit 3 [Source:HGNC Symbol;Acc:HGNC:28719]	79441	Q68CZ6	Q68CZ6
-0.70209	1.36011	-2.51309	0.0206689	0.33702	ENSG00000137491.14	FALSE	ENSG00000137491	11	SLCO2B1	protein_coding	5875	solute carrier organic anion transporter family member 2B1 [Source:HGNC Symbol;Acc:HGNC:10962]	11309	O94956	O94956
-0.157445	5.80093	-2.51281	0.0206816	0.33702	ENSG00000163479.13	FALSE	ENSG00000163479	1	SSR2	protein_coding	5166	signal sequence receptor subunit 2 [Source:HGNC Symbol;Acc:HGNC:11324]	6746	P43308	P43308
0.332189	3.12346	2.51277	0.020683	0.33702	ENSG00000148824.18	FALSE	ENSG00000148824	10	MTG1	protein_coding	2730	mitochondrial ribosome associated GTPase 1 [Source:HGNC Symbol;Acc:HGNC:32159]	92170	Q9BT17	Q9BT17
-0.185921	4.82925	-2.51244	0.0206978	0.33702	ENSG00000126351.12	FALSE	ENSG00000126351	17	THRA	protein_coding	4895	thyroid hormone receptor alpha [Source:HGNC Symbol;Acc:HGNC:11796]	7067	P10827	P10827
-0.406919	3.81905	-2.51211	0.0207126	0.33702	ENSG00000278705.1	FALSE	ENSG00000278705	6	HIST1H4B	protein_coding	438	histone cluster 1 H4 family member b [Source:HGNC Symbol;Acc:HGNC:4789]	8366	B2R4R0	B2R4R0
0.133269	6.42039	2.51099	0.0207621	0.33702	ENSG00000007392.16	FALSE	ENSG00000007392	16	LUC7L	protein_coding	2737	LUC7 like [Source:HGNC Symbol;Acc:HGNC:6723]	55692	Q1W6G4	Q1W6G4
0.13007	5.24639	2.51092	0.0207653	0.33702	ENSG00000186834.3	FALSE	ENSG00000186834	17	HEXIM1	protein_coding	3600	hexamethylene bisacetamide inducible 1 [Source:HGNC Symbol;Acc:HGNC:24953]	10614	O94992	O94992
-0.780948	0.321344	-2.51044	0.0207865	0.33702	ENSG00000115295.19	FALSE	ENSG00000115295	2	CLIP4	protein_coding	4293	CAP-Gly domain containing linker protein family member 4 [Source:HGNC Symbol;Acc:HGNC:26108]	79745	B7Z936	B7Z936
-0.185579	4.13514	-2.50921	0.0208411	0.337486	ENSG00000111737.11	FALSE	ENSG00000111737	12	RAB35	protein_coding	2945	RAB35, member RAS oncogene family [Source:HGNC Symbol;Acc:HGNC:9774]	11021	Q15286	Q15286
0.294642	3.31253	2.50837	0.0208787	0.337677	ENSG00000156876.9	FALSE	ENSG00000156876	1	SASS6	protein_coding	3972	SAS-6 centriolar assembly protein [Source:HGNC Symbol;Acc:HGNC:25403]	163786	Q495U0	Q495U0
0.216632	3.25479	2.5068	0.0209487	0.337798	ENSG00000139233.6	FALSE	ENSG00000139233	12	LLPH	protein_coding	7746	LLP homolog, long-term synaptic facilitation factor [Source:HGNC Symbol;Acc:HGNC:28229]	84298	A0A024RB76	A0A024RB76
0.137954	6.85597	2.5064	0.0209666	0.337798	ENSG00000117616.17	FALSE	ENSG00000117616	1	RSRP1	protein_coding	3034	arginine and serine rich protein 1 [Source:HGNC Symbol;Acc:HGNC:25234]	57035	A0A024RAH6	A0A024RAH6
0.301141	3.29456	2.5059	0.0209891	0.337798	ENSG00000198142.4	FALSE	ENSG00000198142	2	SOWAHC	protein_coding	4657	sosondowah ankyrin repeat domain family member C [Source:HGNC Symbol;Acc:HGNC:26149]	65124	Q53LP3	Q53LP3
0.234418	4.65239	2.50571	0.0209976	0.337798	ENSG00000182768.8	FALSE	ENSG00000182768	15	NGRN	protein_coding	7237	neugrin, neurite outgrowth associated [Source:HGNC Symbol;Acc:HGNC:18077]	51335	Q9NPE2	Q9NPE2
-0.303398	1.77783	-2.50439	0.0210566	0.337798	ENSG00000183060.15	FALSE	ENSG00000183060	15	LYSMD4	protein_coding	3001	LysM domain containing 4 [Source:HGNC Symbol;Acc:HGNC:26571]	145748	Q5XG99	Q5XG99
-0.152575	9.48004	-2.50397	0.0210757	0.337798	ENSG00000107581.12	FALSE	ENSG00000107581	10	EIF3A	protein_coding	6646	eukaryotic translation initiation factor 3 subunit A [Source:HGNC Symbol;Acc:HGNC:3271]	8661	Q14152	Q14152
0.177499	4.92259	2.50285	0.0211263	0.337798	ENSG00000143669.13	FALSE	ENSG00000143669	1	LYST	protein_coding	13480	lysosomal trafficking regulator [Source:HGNC Symbol;Acc:HGNC:1968]	1130	Q99698	Q99698
0.22064	3.8124	2.50195	0.0211667	0.337798	ENSG00000176148.15	FALSE	ENSG00000176148	11	TCP11L1	protein_coding	3390	t-complex 11 like 1 [Source:HGNC Symbol;Acc:HGNC:25655]	55346	Q9NUJ3	Q9NUJ3
-0.165821	7.43358	-2.50189	0.0211694	0.337798	ENSG00000108679.12	FALSE	ENSG00000108679	17	LGALS3BP	protein_coding	2405	galectin 3 binding protein [Source:HGNC Symbol;Acc:HGNC:6564]	3959	A0A0S2Z3Y1	A0A0S2Z3Y1
-0.209115	3.56296	-2.50146	0.0211888	0.337798	ENSG00000177303.9	FALSE	ENSG00000177303	17	CASKIN2	protein_coding	5015	CASK interacting protein 2 [Source:HGNC Symbol;Acc:HGNC:18200]	57513	Q8WXE0	Q8WXE0
-0.652259	-0.212442	-2.50144	0.0211899	0.337798	ENSG00000182747.4	FALSE	ENSG00000182747	6	SLC35D3	protein_coding	2359	solute carrier family 35 member D3 [Source:HGNC Symbol;Acc:HGNC:15621]	340146	B7Z9Y0	B7Z9Y0
0.453442	1.41466	2.50003	0.0212537	0.337798	ENSG00000167034.9	FALSE	ENSG00000167034	8	NKX3-1	protein_coding	3271	NK3 homeobox 1 [Source:HGNC Symbol;Acc:HGNC:7838]	4824	Q99801	Q99801
0.185991	4.2939	2.49824	0.021335	0.337798	ENSG00000114648.11	FALSE	ENSG00000114648	3	KLHL18	protein_coding	4620	kelch like family member 18 [Source:HGNC Symbol;Acc:HGNC:29120]	23276	A0A024R2T4	A0A024R2T4
-0.456431	3.09329	-2.49793	0.0213493	0.337798	ENSG00000023839.11	FALSE	ENSG00000023839	10	ABCC2	protein_coding	5806	ATP binding cassette subfamily C member 2 [Source:HGNC Symbol;Acc:HGNC:53]	1244	Q92887	Q92887
0.381733	3.13218	2.49681	0.0214001	0.337798	ENSG00000145882.10	FALSE	ENSG00000145882	5	PCYOX1L	protein_coding	4887	prenylcysteine oxidase 1 like [Source:HGNC Symbol;Acc:HGNC:28477]	78991	Q8NBM8	Q8NBM8
0.154362	6.07823	2.49649	0.0214147	0.337798	ENSG00000094975.13	FALSE	ENSG00000094975	1	SUCO	protein_coding	5916	SUN domain containing ossification factor [Source:HGNC Symbol;Acc:HGNC:1240]	51430	B4DYM4	B4DYM4
-0.125493	5.98483	-2.49644	0.0214173	0.337798	ENSG00000179262.9	FALSE	ENSG00000179262	19	RAD23A	protein_coding	1746	RAD23 homolog A, nucleotide excision repair protein [Source:HGNC Symbol;Acc:HGNC:9812]	5886	A8K1J3	A8K1J3
-0.280691	3.59791	-2.49593	0.0214403	0.337798	ENSG00000132781.17	FALSE	ENSG00000132781	1	MUTYH	protein_coding	1929	mutY DNA glycosylase [Source:HGNC Symbol;Acc:HGNC:7527]	4595	E5KP27	E5KP27
-0.143414	9.51609	-2.49576	0.0214481	0.337798	ENSG00000067225.17	FALSE	ENSG00000067225	15	PKM	protein_coding	3016	pyruvate kinase M1/2 [Source:HGNC Symbol;Acc:HGNC:9021]	5315	P14618	P14618
0.194312	4.91817	2.49568	0.0214517	0.337798	ENSG00000102780.16	FALSE	ENSG00000102780	13	DGKH	protein_coding	17261	diacylglycerol kinase eta [Source:HGNC Symbol;Acc:HGNC:2854]	160851	A8K0I1	A8K0I1
0.208388	5.6463	2.49488	0.0214887	0.337798	ENSG00000110888.17	FALSE	ENSG00000110888	12	CAPRIN2	protein_coding	6543	caprin family member 2 [Source:HGNC Symbol;Acc:HGNC:21259]	65981	Q6IMN6	Q6IMN6
-0.193327	4.13468	-2.49484	0.0214906	0.337798	ENSG00000177192.13	FALSE	ENSG00000177192	12	PUS1	protein_coding	4094	pseudouridine synthase 1 [Source:HGNC Symbol;Acc:HGNC:15508]	80324	E5KMT6	E5KMT6
-0.28643	4.72746	-2.49481	0.0214917	0.337798	ENSG00000166562.8	FALSE	ENSG00000166562	18	SEC11C	protein_coding	2054	SEC11 homolog C, signal peptidase complex subunit [Source:HGNC Symbol;Acc:HGNC:23400]	90701	K7EJQ7	K7EJQ7
0.168144	6.43636	2.49449	0.0215066	0.337798	ENSG00000109046.14	FALSE	ENSG00000109046	17	WSB1	protein_coding	5139	WD repeat and SOCS box containing 1 [Source:HGNC Symbol;Acc:HGNC:19221]	26118	Q8NC76	Q8NC76
0.252629	4.67913	2.49137	0.0216499	0.33964	ENSG00000094880.10	FALSE	ENSG00000094880	5	CDC23	protein_coding	3155	cell division cycle 23 [Source:HGNC Symbol;Acc:HGNC:1724]	8697	Q9UJX2	Q9UJX2
-0.101756	6.81927	-2.48991	0.0217174	0.340254	ENSG00000166164.15	FALSE	ENSG00000166164	16	BRD7	protein_coding	5370	bromodomain containing 7 [Source:HGNC Symbol;Acc:HGNC:14310]	29117	Q9NPI1	Q9NPI1
-0.197748	4.86635	-2.4894	0.0217411	0.340254	ENSG00000131242.17	FALSE	ENSG00000131242	17	RAB11FIP4	protein_coding	8628	RAB11 family interacting protein 4 [Source:HGNC Symbol;Acc:HGNC:30267]	84440	Q86YS3	Q86YS3
-0.241831	3.67308	-2.48809	0.0218017	0.340314	ENSG00000125863.19	FALSE	ENSG00000125863	20	MKKS	protein_coding	6714	McKusick-Kaufman syndrome [Source:HGNC Symbol;Acc:HGNC:7108]	8195	B7Z3W9	B7Z3W9
-0.17215	5.09427	-2.48809	0.0218017	0.340314	ENSG00000167861.15	FALSE	ENSG00000167861	17	HID1	protein_coding	3271	HID1 domain containing [Source:HGNC Symbol;Acc:HGNC:15736]	283987	Q8IV36	Q8IV36
0.234996	5.14436	2.48763	0.021823	0.340314	ENSG00000177383.4	FALSE	ENSG00000177383	3	MAGEF1	protein_coding	1636	MAGE family member F1 [Source:HGNC Symbol;Acc:HGNC:29639]	64110	Q9HAY2	Q9HAY2
-0.149459	5.72662	-2.48696	0.0218542	0.340394	ENSG00000182158.14	FALSE	ENSG00000182158	7	CREB3L2	protein_coding	7412	cAMP responsive element binding protein 3 like 2 [Source:HGNC Symbol;Acc:HGNC:23720]	64764	Q70SY1	Q70SY1
-0.361049	3.49934	-2.48467	0.0219613	0.341099	ENSG00000188070.9	FALSE	ENSG00000188070	11	C11ORF95	protein_coding	5716	chromosome 11 open reading frame 95 [Source:HGNC Symbol;Acc:HGNC:28449]	65998	C9JLR9	C9JLR9
-0.186165	5.09078	-2.48454	0.0219671	0.341099	ENSG00000167755.14	FALSE	ENSG00000167755	19	KLK6	protein_coding	1708	kallikrein related peptidase 6 [Source:HGNC Symbol;Acc:HGNC:6367]	5653	A0A024R4J8	A0A024R4J8
-0.171612	5.97087	-2.48417	0.0219847	0.341099	ENSG00000106078.18	FALSE	ENSG00000106078	7	COBL	protein_coding	7697	cordon-bleu WH2 repeat protein [Source:HGNC Symbol;Acc:HGNC:22199]	23242	O75128	O75128
-0.290711	3.34973	-2.48376	0.0220039	0.341099	ENSG00000104671.7	FALSE	ENSG00000104671	8	DCTN6	protein_coding	1127	dynactin subunit 6 [Source:HGNC Symbol;Acc:HGNC:16964]	10671	O00399	O00399
-0.185794	4.20026	-2.48295	0.0220419	0.341284	ENSG00000052795.12	FALSE	ENSG00000052795	4	FNIP2	protein_coding	6925	folliculin interacting protein 2 [Source:HGNC Symbol;Acc:HGNC:29280]	57600	Q9P278	Q9P278
-0.20478	4.84633	-2.48152	0.0221092	0.341921	ENSG00000135596.17	FALSE	ENSG00000135596	6	MICAL1	protein_coding	4381	microtubule associated monooxygenase, calponin and LIM domain containing 1 [Source:HGNC Symbol;Acc:HGNC:20619]	64780	Q8TDZ2	Q8TDZ2
-0.139847	5.22644	-2.47961	0.0221991	0.342905	ENSG00000100422.13	FALSE	ENSG00000100422	22	CERK	protein_coding	4450	ceramide kinase [Source:HGNC Symbol;Acc:HGNC:19256]	64781	A0A024R4U8	A0A024R4U8
-0.290274	3.70515	-2.47792	0.0222792	0.342988	ENSG00000130766.4	FALSE	ENSG00000130766	1	SESN2	protein_coding	3453	sestrin 2 [Source:HGNC Symbol;Acc:HGNC:20746]	83667	P58004	P58004
-0.324452	2.6448	-2.47771	0.0222888	0.342988	ENSG00000155792.9	FALSE	ENSG00000155792	8	DEPTOR	protein_coding	2569	DEP domain containing MTOR interacting protein [Source:HGNC Symbol;Acc:HGNC:22953]	64798	Q8TB45	Q8TB45
-0.1467	9.61401	-2.47722	0.0223124	0.342988	ENSG00000135486.17	FALSE	ENSG00000135486	12	HNRNPA1	protein_coding	4121	heterogeneous nuclear ribonucleoprotein A1 [Source:HGNC Symbol;Acc:HGNC:5031]	3178	A0A024RB53	A0A024RB53
-0.173906	5.09921	-2.47714	0.022316	0.342988	ENSG00000204209.12	FALSE	ENSG00000204209	6	DAXX	protein_coding	2613	death domain associated protein [Source:HGNC Symbol;Acc:HGNC:2681]	1616	A0A024RCS3	A0A024RCS3
-0.11597	10.1117	-2.47673	0.0223357	0.342988	ENSG00000184009.11	FALSE	ENSG00000184009	17	ACTG1	protein_coding	2256	actin gamma 1 [Source:HGNC Symbol;Acc:HGNC:144]	71	P63261	P63261
-0.868608	-0.68981	-2.47445	0.0224441	0.344097	ENSG00000054219.10	FALSE	ENSG00000054219	2	LY75	protein_coding	6886	lymphocyte antigen 75 [Source:HGNC Symbol;Acc:HGNC:6729]	4065	O60449	O60449
-0.663729	0.969628	-2.47379	0.0224756	0.344097	ENSG00000196569.12	FALSE	ENSG00000196569	6	LAMA2	protein_coding	9687	laminin subunit alpha 2 [Source:HGNC Symbol;Acc:HGNC:6482]	3908	P24043	P24043
-0.357112	2.22853	-2.47305	0.022511	0.344097	ENSG00000159905.14	FALSE	ENSG00000159905	19	ZNF221	protein_coding	2535	zinc finger protein 221 [Source:HGNC Symbol;Acc:HGNC:13014]	7638	A0A087WT08	A0A087WT08
0.487909	1.96782	2.47278	0.0225241	0.344097	ENSG00000104892.16	FALSE	ENSG00000104892	19	KLC3	protein_coding	2006	kinesin light chain 3 [Source:HGNC Symbol;Acc:HGNC:20717]	147700	A0A024R0V3	A0A024R0V3
0.212371	5.34573	2.47245	0.0225395	0.344097	ENSG00000118564.14	FALSE	ENSG00000118564	4	FBXL5	protein_coding	3385	F-box and leucine rich repeat protein 5 [Source:HGNC Symbol;Acc:HGNC:13602]	26234	Q9UKA1	Q9UKA1
-0.259475	3.9236	-2.47126	0.0225968	0.344317	ENSG00000173486.12	FALSE	ENSG00000173486	11	FKBP2	protein_coding	1002	FK506 binding protein 2 [Source:HGNC Symbol;Acc:HGNC:3718]	2286	P26885	P26885
-0.212736	4.32763	-2.47097	0.0226106	0.344317	ENSG00000197070.13	FALSE	ENSG00000197070	9	ARRDC1	protein_coding	3185	arrestin domain containing 1 [Source:HGNC Symbol;Acc:HGNC:28633]	92714	Q8N5I2	Q8N5I2
-0.274262	3.63204	-2.47051	0.022633	0.344317	ENSG00000149483.11	FALSE	ENSG00000149483	11	TMEM138	protein_coding	2839	transmembrane protein 138 [Source:HGNC Symbol;Acc:HGNC:26944]	51524	J3QSZ6	J3QSZ6
0.173442	8.26911	2.46936	0.0226882	0.344401	ENSG00000134884.14	FALSE	ENSG00000134884	13	ARGLU1	protein_coding	4009	arginine and glutamate rich 1 [Source:HGNC Symbol;Acc:HGNC:25482]	55082	A0A024RDW4	A0A024RDW4
0.518727	1.22452	2.4693	0.0226913	0.344401	ENSG00000154839.9	FALSE	ENSG00000154839	18	SKA1	protein_coding	2905	spindle and kinetochore associated complex subunit 1 [Source:HGNC Symbol;Acc:HGNC:28109]	220134	A0A024R294	A0A024R294
0.756672	-0.717862	2.46868	0.022721	0.344453	ENSG00000167244.19	FALSE	ENSG00000167244	11	IGF2	protein_coding	5585	insulin like growth factor 2 [Source:HGNC Symbol;Acc:HGNC:5466]	3481	P01344	P01344
-0.271431	2.72234	-2.46812	0.0227483	0.344467	ENSG00000112039.4	FALSE	ENSG00000112039	6	FANCE	protein_coding	2554	FA complementation group E [Source:HGNC Symbol;Acc:HGNC:3586]	2178	Q9HB96	Q9HB96
0.364929	2.9784	2.46725	0.0227901	0.344701	ENSG00000165244.6	FALSE	ENSG00000165244	9	ZNF367	protein_coding	3646	zinc finger protein 367 [Source:HGNC Symbol;Acc:HGNC:18320]	195828	Q7RTV3	Q7RTV3
0.237306	4.32051	2.46478	0.0229101	0.346115	ENSG00000170345.9	FALSE	ENSG00000170345	14	FOS	protein_coding	2158	Fos proto-oncogene, AP-1 transcription factor subunit [Source:HGNC Symbol;Acc:HGNC:3796]	2353	P01100	P01100
-0.176069	4.13311	-2.46358	0.0229685	0.346275	ENSG00000122390.18	FALSE	ENSG00000122390	16	NAA60	protein_coding	3899	N_alpha_-acetyltransferase 60, NatF catalytic subunit [Source:HGNC Symbol;Acc:HGNC:25875]	79903	Q9H7X0	Q9H7X0
0.196671	3.37708	2.46319	0.0229877	0.346275	ENSG00000162946.22	FALSE	ENSG00000162946	1	DISC1	protein_coding	7059	DISC1 scaffold protein [Source:HGNC Symbol;Acc:HGNC:2888]	27185	Q9NRI5	Q9NRI5
-0.255037	4.26296	-2.46293	0.0230002	0.346275	ENSG00000173153.13	FALSE	ENSG00000173153	11	ESRRA	protein_coding	2283	estrogen related receptor alpha [Source:HGNC Symbol;Acc:HGNC:3471]	2101	P11474	P11474
-0.207422	5.21076	-2.46208	0.0230417	0.3465	ENSG00000105127.8	FALSE	ENSG00000105127	19	AKAP8	protein_coding	3670	A-kinase anchoring protein 8 [Source:HGNC Symbol;Acc:HGNC:378]	10270	O43823	O43823
-0.123967	7.1106	-2.45952	0.0231672	0.347217	ENSG00000179010.14	FALSE	ENSG00000179010	4	MRFAP1	protein_coding	2112	Morf4 family associated protein 1 [Source:HGNC Symbol;Acc:HGNC:24549]	93621	Q9Y605	Q9Y605
0.431521	4.17173	2.45912	0.023187	0.347217	ENSG00000170312.15	FALSE	ENSG00000170312	10	CDK1	protein_coding	1948	cyclin dependent kinase 1 [Source:HGNC Symbol;Acc:HGNC:1722]	983	B7Z3D6	B7Z3D6
-0.59129	1.09853	-2.4581	0.0232372	0.347217	ENSG00000253598.1	FALSE	ENSG00000253598	8	SLC10A5	protein_coding	2568	solute carrier family 10 member 5 [Source:HGNC Symbol;Acc:HGNC:22981]	347051	Q5PT55	Q5PT55
-0.165161	4.78278	-2.4579	0.0232474	0.347217	ENSG00000148300.11	FALSE	ENSG00000148300	9	REXO4	protein_coding	2360	REX4 homolog, 3'-5' exonuclease [Source:HGNC Symbol;Acc:HGNC:12820]	57109	B4E331	B4E331
-0.203711	5.93457	-2.45759	0.0232622	0.347217	ENSG00000013364.18	FALSE	ENSG00000013364	16	MVP	protein_coding	2925	major vault protein [Source:HGNC Symbol;Acc:HGNC:7531]	9961	Q14764	Q14764
-0.46481	2.77299	-2.45728	0.0232776	0.347217	ENSG00000176387.6	FALSE	ENSG00000176387	16	HSD11B2	protein_coding	1900	hydroxysteroid 11-beta dehydrogenase 2 [Source:HGNC Symbol;Acc:HGNC:5209]	3291	P80365	P80365
-0.221854	4.34136	-2.4566	0.0233116	0.347217	ENSG00000134030.13	FALSE	ENSG00000134030	18	CTIF	protein_coding	5750	cap binding complex dependent translation initiation factor [Source:HGNC Symbol;Acc:HGNC:23925]	9811	O43310	O43310
-0.220486	4.31771	-2.45657	0.023313	0.347217	ENSG00000088826.17	FALSE	ENSG00000088826	20	SMOX	protein_coding	2322	spermine oxidase [Source:HGNC Symbol;Acc:HGNC:15862]	54498	Q9NWM0	Q9NWM0
0.185178	5.75776	2.45615	0.0233334	0.347217	ENSG00000163428.3	FALSE	ENSG00000163428	3	LRRC58	protein_coding	7903	leucine rich repeat containing 58 [Source:HGNC Symbol;Acc:HGNC:26968]	116064	Q96CX6	Q96CX6
-0.265805	5.69397	-2.45514	0.0233839	0.347217	ENSG00000164889.13	FALSE	ENSG00000164889	7	SLC4A2	protein_coding	4925	solute carrier family 4 member 2 [Source:HGNC Symbol;Acc:HGNC:11028]	6522	P04920	P04920
-0.182295	4.59197	-2.45505	0.0233884	0.347217	ENSG00000147123.10	FALSE	ENSG00000147123	X	NDUFB11	protein_coding	1388	NADH:ubiquinone oxidoreductase subunit B11 [Source:HGNC Symbol;Acc:HGNC:20372]	54539	Q9NX14	Q9NX14
-0.282078	4.61071	-2.45438	0.0234216	0.347217	ENSG00000150961.14	FALSE	ENSG00000150961	4	SEC24D	protein_coding	4030	SEC24 homolog D, COPII coat complex component [Source:HGNC Symbol;Acc:HGNC:10706]	9871	O94855	O94855
-0.356904	2.91968	-2.45411	0.0234348	0.347217	ENSG00000158715.5	FALSE	ENSG00000158715	1	SLC45A3	protein_coding	3341	solute carrier family 45 member 3 [Source:HGNC Symbol;Acc:HGNC:8642]	85414	Q96JT2	Q96JT2
-0.204611	5.21927	-2.45139	0.0235704	0.348596	ENSG00000184384.13	FALSE	ENSG00000184384	11	MAML2	protein_coding	7106	mastermind like transcriptional coactivator 2 [Source:HGNC Symbol;Acc:HGNC:16259]	84441	Q8IZL2	Q8IZL2
0.322264	2.9151	2.45098	0.0235909	0.348596	ENSG00000119723.16	FALSE	ENSG00000119723	14	COQ6	protein_coding	3119	coenzyme Q6, monooxygenase [Source:HGNC Symbol;Acc:HGNC:20233]	51004	Q9Y2Z9	Q9Y2Z9
0.165561	5.06538	2.44997	0.0236413	0.348596	ENSG00000145241.10	FALSE	ENSG00000145241	4	CENPC	protein_coding	6940	centromere protein C [Source:HGNC Symbol;Acc:HGNC:1854]	1060	Q03188	Q03188
-0.180885	3.5505	-2.44956	0.0236619	0.348596	ENSG00000214087.8	FALSE	ENSG00000214087	17	ARL16	protein_coding	2343	ADP ribosylation factor like GTPase 16 [Source:HGNC Symbol;Acc:HGNC:27902]	339231	Q0P5N6	Q0P5N6
-0.826719	-0.798368	-2.44916	0.0236822	0.348596	ENSG00000198870.7	FALSE	ENSG00000198870	9	STKLD1	protein_coding	2825	serine/threonine kinase like domain containing 1 [Source:HGNC Symbol;Acc:HGNC:28669]	169436	Q8NE28	Q8NE28
-0.134783	6.2868	-2.44852	0.0237141	0.348596	ENSG00000147010.17	FALSE	ENSG00000147010	X	SH3KBP1	protein_coding	4731	SH3 domain containing kinase binding protein 1 [Source:HGNC Symbol;Acc:HGNC:13867]	30011	Q96B97	Q96B97
0.174981	6.64869	2.4483	0.0237254	0.348596	ENSG00000173193.14	FALSE	ENSG00000173193	3	PARP14	protein_coding	8437	poly_ADP-ribose_ polymerase family member 14 [Source:HGNC Symbol;Acc:HGNC:29232]	54625	Q460N5	Q460N5
0.365155	2.06744	2.44785	0.0237478	0.348596	ENSG00000177602.5	FALSE	ENSG00000177602	17	HASPIN	protein_coding	2797	histone H3 associated protein kinase [Source:HGNC Symbol;Acc:HGNC:19682]	83903	A0PJ70	A0PJ70
-0.186576	3.57267	-2.44745	0.0237679	0.348596	ENSG00000166189.7	FALSE	ENSG00000166189	10	HPS6	protein_coding	2649	HPS6, biogenesis of lysosomal organelles complex 2 subunit 3 [Source:HGNC Symbol;Acc:HGNC:18817]	79803	Q86YV9	Q86YV9
-0.80682	2.67323	-2.44547	0.0238677	0.349625	ENSG00000041982.15	FALSE	ENSG00000041982	9	TNC	protein_coding	7641	tenascin C [Source:HGNC Symbol;Acc:HGNC:5318]	3371	B4E1W8	B4E1W8
0.180136	5.13285	2.445	0.0238916	0.349625	ENSG00000106086.19	FALSE	ENSG00000106086	7	PLEKHA8	protein_coding	7835	pleckstrin homology domain containing A8 [Source:HGNC Symbol;Acc:HGNC:30037]	84725	Q96JA3	Q96JA3
0.153653	4.14189	2.4443	0.023927	0.349727	ENSG00000168282.5	FALSE	ENSG00000168282	14	MGAT2	protein_coding	2687	mannosyl _alpha-1,6-_-glycoprotein beta-1,2-N-acetylglucosaminyltransferase [Source:HGNC Symbol;Acc:HGNC:7045]	4247	Q10469	Q10469
0.408473	1.39237	2.44381	0.0239521	0.349727	ENSG00000104154.6	FALSE	ENSG00000104154	15	SLC30A4	protein_coding	7157	solute carrier family 30 member 4 [Source:HGNC Symbol;Acc:HGNC:11015]	7782	O14863	O14863
0.163128	5.07548	2.44245	0.0240208	0.35034	ENSG00000136854.20	FALSE	ENSG00000136854	9	STXBP1	protein_coding	4893	syntaxin binding protein 1 [Source:HGNC Symbol;Acc:HGNC:11444]	6812	P61764	P61764
0.551152	0.520772	2.44152	0.0240682	0.350521	ENSG00000133874.1	FALSE	ENSG00000133874	8	RNF122	protein_coding	1868	ring finger protein 122 [Source:HGNC Symbol;Acc:HGNC:21147]	79845	Q9H9V4	Q9H9V4
-0.130539	8.21552	-2.44103	0.0240934	0.350521	ENSG00000091409.14	FALSE	ENSG00000091409	2	ITGA6	protein_coding	5618	integrin subunit alpha 6 [Source:HGNC Symbol;Acc:HGNC:6142]	3655	P23229	P23229
-0.10429	5.78713	-2.44063	0.0241138	0.350521	ENSG00000157020.17	FALSE	ENSG00000157020	3	SEC13	protein_coding	2374	SEC13 homolog, nuclear pore and COPII coat complex component [Source:HGNC Symbol;Acc:HGNC:10697]	6396	P55735	P55735
-0.318143	2.44248	-2.43841	0.0242274	0.351608	ENSG00000146826.16	FALSE	ENSG00000146826	7	C7ORF43	protein_coding	2520	chromosome 7 open reading frame 43 [Source:HGNC Symbol;Acc:HGNC:25604]	55262	B3KNS5	B3KNS5
-0.27814	2.86281	-2.43812	0.0242423	0.351608	ENSG00000178694.9	FALSE	ENSG00000178694	3	NSUN3	protein_coding	3289	NOP2/Sun RNA methyltransferase family member 3 [Source:HGNC Symbol;Acc:HGNC:26208]	63899	Q9H649	Q9H649
-0.154925	10.6206	-2.437	0.0242997	0.352034	ENSG00000089157.15	FALSE	ENSG00000089157	12	RPLP0	protein_coding	2591	ribosomal protein lateral stalk subunit P0 [Source:HGNC Symbol;Acc:HGNC:10371]	6175	A0A024RBS2	A0A024RBS2
-0.590629	1.73063	-2.4365	0.0243256	0.352034	ENSG00000116771.5	FALSE	ENSG00000116771	1	AGMAT	protein_coding	2500	agmatinase [Source:HGNC Symbol;Acc:HGNC:18407]	79814	A0A024QZ78	A0A024QZ78
-0.246255	4.20828	-2.4356	0.0243716	0.35231	ENSG00000139637.13	FALSE	ENSG00000139637	12	C12ORF10	protein_coding	1369	chromosome 12 open reading frame 10 [Source:HGNC Symbol;Acc:HGNC:17590]	60314	Q86UA3	Q86UA3
-0.728052	1.61161	-2.43454	0.0244263	0.352345	ENSG00000114854.7	FALSE	ENSG00000114854	3	TNNC1	protein_coding	727	troponin C1, slow skeletal and cardiac type [Source:HGNC Symbol;Acc:HGNC:11943]	7134	P63316	P63316
0.254559	4.1683	2.43423	0.0244422	0.352345	ENSG00000102996.4	FALSE	ENSG00000102996	16	MMP15	protein_coding	4250	matrix metallopeptidase 15 [Source:HGNC Symbol;Acc:HGNC:7161]	4324	A0A024R6U8	A0A024R6U8
-0.127885	6.70806	-2.4334	0.0244853	0.352345	ENSG00000141522.11	FALSE	ENSG00000141522	17	ARHGDIA	protein_coding	1906	Rho GDP dissociation inhibitor alpha [Source:HGNC Symbol;Acc:HGNC:678]	396	P52565	P52565
-0.322594	3.88621	-2.43155	0.0245813	0.352345	ENSG00000107833.10	FALSE	ENSG00000107833	10	NPM3	protein_coding	877	nucleophosmin/nucleoplasmin 3 [Source:HGNC Symbol;Acc:HGNC:7931]	10360	O75607	O75607
-0.344517	3.1774	-2.43153	0.0245825	0.352345	ENSG00000108352.12	FALSE	ENSG00000108352	17	RAPGEFL1	protein_coding	4184	Rap guanine nucleotide exchange factor like 1 [Source:HGNC Symbol;Acc:HGNC:17428]	51195	Q9UHV5	Q9UHV5
0.677508	0.646729	2.43078	0.0246216	0.352345	ENSG00000163412.12	FALSE	ENSG00000163412	3	EIF4E3	protein_coding	9949	eukaryotic translation initiation factor 4E family member 3 [Source:HGNC Symbol;Acc:HGNC:31837]	317649	Q8N5X7	Q8N5X7
0.187154	4.99927	2.4307	0.0246254	0.352345	ENSG00000181904.8	FALSE	ENSG00000181904	5	C5ORF24	protein_coding	5065	chromosome 5 open reading frame 24 [Source:HGNC Symbol;Acc:HGNC:26746]	134553	Q7Z6I8	Q7Z6I8
-0.203712	3.67382	-2.4305	0.0246359	0.352345	ENSG00000163617.10	FALSE	ENSG00000163617	3	CCDC191	protein_coding	3976	coiled-coil domain containing 191 [Source:HGNC Symbol;Acc:HGNC:29272]	57577	Q8NCU4	Q8NCU4
-0.194784	9.06419	-2.42915	0.0247063	0.352345	ENSG00000143947.13	FALSE	ENSG00000143947	2	RPS27A	protein_coding	1159	ribosomal protein S27a [Source:HGNC Symbol;Acc:HGNC:10417]	6233	B2RDW1	B2RDW1
-0.183959	4.97075	-2.42902	0.0247133	0.352345	ENSG00000099795.6	FALSE	ENSG00000099795	19	NDUFB7	protein_coding	531	NADH:ubiquinone oxidoreductase subunit B7 [Source:HGNC Symbol;Acc:HGNC:7702]	4713	P17568	P17568
-0.383348	3.12571	-2.42882	0.0247233	0.352345	ENSG00000166851.14	FALSE	ENSG00000166851	16	PLK1	protein_coding	4135	polo like kinase 1 [Source:HGNC Symbol;Acc:HGNC:9077]	5347	P53350	P53350
0.136947	5.12675	2.42831	0.0247503	0.352345	ENSG00000103061.12	FALSE	ENSG00000103061	16	SLC7A6OS	protein_coding	4189	solute carrier family 7 member 6 opposite strand [Source:HGNC Symbol;Acc:HGNC:25807]	84138	Q96CW6	Q96CW6
-0.22146	3.49121	-2.4283	0.024751	0.352345	ENSG00000108578.14	FALSE	ENSG00000108578	17	BLMH	protein_coding	2365	bleomycin hydrolase [Source:HGNC Symbol;Acc:HGNC:1059]	642	Q13867	Q13867
0.243025	3.19791	2.42814	0.0247593	0.352345	ENSG00000244687.11	FALSE	ENSG00000244687	20	UBE2V1	protein_coding	2536	ubiquitin conjugating enzyme E2 V1 [Source:HGNC Symbol;Acc:HGNC:12494]	7335	Q13404	Q13404
0.284821	2.33313	2.42741	0.0247971	0.352345	ENSG00000143554.13	FALSE	ENSG00000143554	1	SLC27A3	protein_coding	4504	solute carrier family 27 member 3 [Source:HGNC Symbol;Acc:HGNC:10997]	11000	Q5K4L6	Q5K4L6
-0.144835	5.08334	-2.4271	0.0248135	0.352345	ENSG00000171793.14	FALSE	ENSG00000171793	1	CTPS1	protein_coding	5325	CTP synthase 1 [Source:HGNC Symbol;Acc:HGNC:2519]	1503	B4E1E0	B4E1E0
0.463764	2.07971	2.42674	0.0248324	0.352345	ENSG00000165501.16	FALSE	ENSG00000165501	14	LRR1	protein_coding	1886	leucine rich repeat protein 1 [Source:HGNC Symbol;Acc:HGNC:19742]	122769	Q6AWA7	Q6AWA7
-0.577365	2.9892	-2.42606	0.0248682	0.35247	ENSG00000159753.13	FALSE	ENSG00000159753	16	CARMIL2	protein_coding	4687	capping protein regulator and myosin 1 linker 2 [Source:HGNC Symbol;Acc:HGNC:27089]	146206	Q6F5E8	Q6F5E8
0.336408	3.00592	2.42425	0.0249632	0.352996	ENSG00000123609.10	FALSE	ENSG00000123609	2	NMI	protein_coding	2094	N-myc and STAT interactor [Source:HGNC Symbol;Acc:HGNC:7854]	9111	Q13287	Q13287
0.186685	4.27607	2.42394	0.0249797	0.352996	ENSG00000103540.16	FALSE	ENSG00000103540	16	CCP110	protein_coding	5549	centriolar coiled-coil protein 110 [Source:HGNC Symbol;Acc:HGNC:24342]	9738	O43303	O43303
0.129409	9.26515	2.42376	0.024989	0.352996	ENSG00000100201.20	FALSE	ENSG00000100201	22	DDX17	protein_coding	6441	DEAD-box helicase 17 [Source:HGNC Symbol;Acc:HGNC:2740]	10521	A0A1W2PQ51	A0A1W2PQ51
0.265573	4.0042	2.4233	0.0250133	0.352996	ENSG00000172469.15	FALSE	ENSG00000172469	6	MANEA	protein_coding	4575	mannosidase endo-alpha [Source:HGNC Symbol;Acc:HGNC:21072]	79694	Q5SRI9	Q5SRI9
-0.390623	2.26889	-2.42058	0.0251574	0.354129	ENSG00000126106.13	FALSE	ENSG00000126106	1	TMEM53	protein_coding	2310	transmembrane protein 53 [Source:HGNC Symbol;Acc:HGNC:26186]	79639	Q6P2H8	Q6P2H8
0.161821	5.67693	2.42031	0.025172	0.354129	ENSG00000100883.11	FALSE	ENSG00000100883	14	SRP54	protein_coding	2327	signal recognition particle 54 [Source:HGNC Symbol;Acc:HGNC:11301]	6729	P61011	P61011
0.211682	3.6202	2.42	0.0251881	0.354129	ENSG00000100211.10	FALSE	ENSG00000100211	22	CBY1	protein_coding	1269	chibby family member 1, beta catenin antagonist [Source:HGNC Symbol;Acc:HGNC:1307]	25776	A0A087WUW0	A0A087WUW0
0.429447	2.6433	2.41918	0.025232	0.354129	ENSG00000125740.13	FALSE	ENSG00000125740	19	FOSB	protein_coding	3775	FosB proto-oncogene, AP-1 transcription factor subunit [Source:HGNC Symbol;Acc:HGNC:3797]	2354	P53539	P53539
-0.222081	6.27717	-2.41892	0.0252459	0.354129	ENSG00000141456.14	FALSE	ENSG00000141456	17	PELP1	protein_coding	5272	proline, glutamate and leucine rich protein 1 [Source:HGNC Symbol;Acc:HGNC:30134]	27043	B4DEX7	B4DEX7
0.201867	3.6373	2.41872	0.0252562	0.354129	ENSG00000150907.7	FALSE	ENSG00000150907	13	FOXO1	protein_coding	5735	forkhead box O1 [Source:HGNC Symbol;Acc:HGNC:3819]	2308	Q12778	Q12778
-0.257714	3.23036	-2.41818	0.0252855	0.354159	ENSG00000132773.11	FALSE	ENSG00000132773	1	TOE1	protein_coding	2389	target of EGR1, exonuclease [Source:HGNC Symbol;Acc:HGNC:15954]	114034	Q96GM8	Q96GM8
-0.429122	1.0614	-2.41695	0.0253509	0.354618	ENSG00000135925.8	FALSE	ENSG00000135925	2	WNT10A	protein_coding	2547	Wnt family member 10A [Source:HGNC Symbol;Acc:HGNC:13829]	80326	Q9GZT5	Q9GZT5
-0.164531	6.16579	-2.41634	0.0253836	0.354618	ENSG00000183018.8	FALSE	ENSG00000183018	17	SPNS2	protein_coding	3447	sphingolipid transporter 2 [Source:HGNC Symbol;Acc:HGNC:26992]	124976	Q8IVW8	Q8IVW8
0.195051	4.53791	2.41604	0.0253996	0.354618	ENSG00000152939.15	FALSE	ENSG00000152939	5	MARVELD2	protein_coding	4376	MARVEL domain containing 2 [Source:HGNC Symbol;Acc:HGNC:26401]	153562	Q8N4S9	Q8N4S9
-0.55246	-1.20401	-2.41531	0.0254385	0.354782	ENSG00000100739.10	FALSE	ENSG00000100739	14	BDKRB1	protein_coding	1687	bradykinin receptor B1 [Source:HGNC Symbol;Acc:HGNC:1029]	623	P46663	P46663
-0.317675	3.72591	-2.41361	0.0255302	0.355682	ENSG00000160991.15	FALSE	ENSG00000160991	7	ORAI2	protein_coding	10811	ORAI calcium release-activated calcium modulator 2 [Source:HGNC Symbol;Acc:HGNC:21667]	80228	Q96SN7	Q96SN7
-0.674029	2.01026	-2.41259	0.0255852	0.356068	ENSG00000134569.9	FALSE	ENSG00000134569	11	LRP4	protein_coding	8076	LDL receptor related protein 4 [Source:HGNC Symbol;Acc:HGNC:6696]	4038	O75096	O75096
0.268314	2.7436	2.4107	0.0256873	0.357108	ENSG00000143919.14	FALSE	ENSG00000143919	2	CAMKMT	protein_coding	1495	calmodulin-lysine N-methyltransferase [Source:HGNC Symbol;Acc:HGNC:26276]	79823	Q7Z624	Q7Z624
-0.203352	4.23595	-2.40886	0.0257872	0.358116	ENSG00000141127.14	FALSE	ENSG00000141127	17	PRPSAP2	protein_coding	1910	phosphoribosyl pyrophosphate synthetase associated protein 2 [Source:HGNC Symbol;Acc:HGNC:9467]	5636	O60256	O60256
0.241794	5.44871	2.40813	0.0258266	0.358282	ENSG00000136824.18	FALSE	ENSG00000136824	9	SMC2	protein_coding	5992	structural maintenance of chromosomes 2 [Source:HGNC Symbol;Acc:HGNC:14011]	10592	A0A024R158	A0A024R158
-0.270152	4.6777	-2.40637	0.0259226	0.359129	ENSG00000204681.10	FALSE	ENSG00000204681	6	GABBR1	protein_coding	4527	gamma-aminobutyric acid type B receptor subunit 1 [Source:HGNC Symbol;Acc:HGNC:4070]	2550	Q59HG8	Q59HG8
-0.236353	3.52324	-2.406	0.0259426	0.359129	ENSG00000112290.12	FALSE	ENSG00000112290	6	WASF1	protein_coding	3220	WAS protein family member 1 [Source:HGNC Symbol;Acc:HGNC:12732]	8936	Q92558	Q92558
0.763108	0.370964	2.40541	0.0259749	0.359196	ENSG00000130830.14	FALSE	ENSG00000130830	X	MPP1	protein_coding	2378	membrane palmitoylated protein 1 [Source:HGNC Symbol;Acc:HGNC:7219]	4354	B4E325	B4E325
0.416664	1.81476	2.40445	0.0260277	0.359546	ENSG00000165490.12	FALSE	ENSG00000165490	11	DDIAS	protein_coding	3533	DNA damage induced apoptosis suppressor [Source:HGNC Symbol;Acc:HGNC:26351]	220042	Q8IXT1	Q8IXT1
0.147047	8.19115	2.4027	0.0261236	0.360362	ENSG00000060237.16	FALSE	ENSG00000060237	12	WNK1	protein_coding	11804	WNK lysine deficient protein kinase 1 [Source:HGNC Symbol;Acc:HGNC:14540]	65125	Q9H4A3	Q9H4A3
0.48998	0.976378	2.40229	0.0261461	0.360362	ENSG00000197776.7	FALSE	ENSG00000197776	14	KLHDC1	protein_coding	2691	kelch domain containing 1 [Source:HGNC Symbol;Acc:HGNC:19836]	122773	Q8N7A1	Q8N7A1
-0.528191	0.457938	-2.40187	0.0261695	0.360362	ENSG00000180535.3	FALSE	ENSG00000180535	7	BHLHA15	protein_coding	796	basic helix-loop-helix family member a15 [Source:HGNC Symbol;Acc:HGNC:22265]	168620	Q7RTS1	Q7RTS1
-0.683957	-0.352911	-2.39957	0.0262961	0.361724	ENSG00000118804.8	FALSE	ENSG00000118804	4	STBD1	protein_coding	3420	starch binding domain 1 [Source:HGNC Symbol;Acc:HGNC:24854]	8987	O95210	O95210
-0.181292	5.9178	-2.39635	0.0264748	0.363521	ENSG00000233927.4	FALSE	ENSG00000233927	19	RPS28	protein_coding	1523	ribosomal protein S28 [Source:HGNC Symbol;Acc:HGNC:10418]	6234	B2R4R9	B2R4R9
-0.396956	2.3673	-2.39622	0.0264824	0.363521	ENSG00000103174.12	FALSE	ENSG00000103174	16	NAGPA	protein_coding	3286	N-acetylglucosamine-1-phosphodiester alpha-N-acetylglucosaminidase [Source:HGNC Symbol;Acc:HGNC:17378]	51172	Q9UK23	Q9UK23
0.177988	5.44366	2.39562	0.0265156	0.363595	ENSG00000067248.9	FALSE	ENSG00000067248	5	DHX29	protein_coding	4557	DExH-box helicase 29 [Source:HGNC Symbol;Acc:HGNC:15815]	54505	Q7Z478	Q7Z478
-0.145195	4.89562	-2.39501	0.0265495	0.363678	ENSG00000120875.8	FALSE	ENSG00000120875	8	DUSP4	protein_coding	5537	dual specificity phosphatase 4 [Source:HGNC Symbol;Acc:HGNC:3070]	1846	Q13115	Q13115
-0.202366	2.81603	-2.39419	0.0265957	0.36393	ENSG00000185019.16	FALSE	ENSG00000185019	20	UBOX5	protein_coding	4631	U-box domain containing 5 [Source:HGNC Symbol;Acc:HGNC:17777]	22888	O94941	O94941
-0.347303	4.2119	-2.39024	0.0268171	0.366575	ENSG00000134369.15	FALSE	ENSG00000134369	1	NAV1	protein_coding	13091	neuron navigator 1 [Source:HGNC Symbol;Acc:HGNC:15989]	89796	Q8NEY1	Q8NEY1
0.577884	1.2031	2.38949	0.0268594	0.36677	ENSG00000185697.16	FALSE	ENSG00000185697	8	MYBL1	protein_coding	5192	MYB proto-oncogene like 1 [Source:HGNC Symbol;Acc:HGNC:7547]	4603	P10243	P10243
-0.504371	3.09112	-2.38839	0.0269216	0.366929	ENSG00000147872.9	FALSE	ENSG00000147872	9	PLIN2	protein_coding	1972	perilipin 2 [Source:HGNC Symbol;Acc:HGNC:248]	123	Q6FHZ7	Q6FHZ7
-0.229072	4.07878	-2.38829	0.0269272	0.366929	ENSG00000160799.11	FALSE	ENSG00000160799	3	CCDC12	protein_coding	2412	coiled-coil domain containing 12 [Source:HGNC Symbol;Acc:HGNC:28332]	151903	Q8WUD4	Q8WUD4
0.577092	-0.478831	2.38526	0.0270995	0.368891	ENSG00000173825.6	FALSE	ENSG00000173825	11	TIGD3	protein_coding	2012	tigger transposable element derived 3 [Source:HGNC Symbol;Acc:HGNC:18334]	220359	Q6B0B8	Q6B0B8
-0.124406	6.04665	-2.3846	0.0271367	0.368971	ENSG00000072274.12	FALSE	ENSG00000072274	3	TFRC	protein_coding	5111	transferrin receptor [Source:HGNC Symbol;Acc:HGNC:11763]	7037	P02786	P02786
0.228911	4.40511	2.38416	0.0271618	0.368971	ENSG00000173933.20	FALSE	ENSG00000173933	11	RBM4	protein_coding	3029	RNA binding motif protein 4 [Source:HGNC Symbol;Acc:HGNC:9901]	5936	Q9BWF3	Q9BWF3
-0.258077	3.96858	-2.38277	0.0272412	0.369436	ENSG00000167925.15	FALSE	ENSG00000167925	17	GHDC	protein_coding	2650	GH3 domain containing [Source:HGNC Symbol;Acc:HGNC:24438]	84514	Q8N2G8	Q8N2G8
-0.182829	6.33466	-2.38177	0.0272983	0.369436	ENSG00000107223.12	FALSE	ENSG00000107223	9	EDF1	protein_coding	809	endothelial differentiation related factor 1 [Source:HGNC Symbol;Acc:HGNC:3164]	8721	O60869	O60869
-0.18117	6.9731	-2.38152	0.0273128	0.369436	ENSG00000170348.8	FALSE	ENSG00000170348	14	TMED10	protein_coding	4127	transmembrane p24 trafficking protein 10 [Source:HGNC Symbol;Acc:HGNC:16998]	10972	A0A024R6I3	A0A024R6I3
0.290215	4.07563	2.38058	0.0273669	0.369436	ENSG00000205707.10	FALSE	ENSG00000205707	12	ETFRF1	protein_coding	1259	electron transfer flavoprotein regulatory factor 1 [Source:HGNC Symbol;Acc:HGNC:27052]	144363	Q6IPR1	Q6IPR1
0.271408	2.82755	2.38	0.0274	0.369436	ENSG00000142731.10	FALSE	ENSG00000142731	4	PLK4	protein_coding	3841	polo like kinase 4 [Source:HGNC Symbol;Acc:HGNC:11397]	10733	O00444	O00444
-0.172887	5.37735	-2.37965	0.0274201	0.369436	ENSG00000197586.12	FALSE	ENSG00000197586	20	ENTPD6	protein_coding	2766	ectonucleoside triphosphate diphosphohydrolase 6 _putative_ [Source:HGNC Symbol;Acc:HGNC:3368]	955	O75354	O75354
-0.714839	4.83191	-2.37959	0.0274237	0.369436	ENSG00000006611.15	FALSE	ENSG00000006611	11	USH1C	protein_coding	2700	USH1 protein network component harmonin [Source:HGNC Symbol;Acc:HGNC:12597]	10083	A0A0S2Z4V1	A0A0S2Z4V1
0.0965037	6.08248	2.37931	0.0274396	0.369436	ENSG00000165219.21	FALSE	ENSG00000165219	9	GAPVD1	protein_coding	8923	GTPase activating protein and VPS9 domains 1 [Source:HGNC Symbol;Acc:HGNC:23375]	26130	Q14C86	Q14C86
0.238997	4.14828	2.3786	0.0274809	0.369436	ENSG00000067365.14	FALSE	ENSG00000067365	16	METTL22	protein_coding	4984	methyltransferase like 22 [Source:HGNC Symbol;Acc:HGNC:28368]	79091	Q9BUU2	Q9BUU2
-0.364807	1.74014	-2.37853	0.0274845	0.369436	ENSG00000239789.5	FALSE	ENSG00000239789	7	MRPS17	protein_coding	1845	mitochondrial ribosomal protein S17 [Source:HGNC Symbol;Acc:HGNC:14047]	51373	Q9Y2R5	Q9Y2R5
-0.215713	3.66253	-2.37772	0.0275314	0.369436	ENSG00000116096.5	FALSE	ENSG00000116096	2	SPR	protein_coding	1480	sepiapterin reductase [Source:HGNC Symbol;Acc:HGNC:11257]	6697	P35270	P35270
0.356673	0.636186	2.37755	0.0275409	0.369436	ENSG00000203727.3	FALSE	ENSG00000203727	6	SAMD5	protein_coding	6089	sterile alpha motif domain containing 5 [Source:HGNC Symbol;Acc:HGNC:21180]	389432	Q5TGI4	Q5TGI4
0.237745	3.39104	2.37669	0.0275906	0.369436	ENSG00000011198.9	FALSE	ENSG00000011198	3	ABHD5	protein_coding	5366	abhydrolase domain containing 5 [Source:HGNC Symbol;Acc:HGNC:21396]	51099	A0A0S2Z5D6	A0A0S2Z5D6
0.128644	5.85317	2.37636	0.0276098	0.369436	ENSG00000039319.16	FALSE	ENSG00000039319	5	ZFYVE16	protein_coding	6773	zinc finger FYVE-type containing 16 [Source:HGNC Symbol;Acc:HGNC:20756]	9765	Q7Z3T8	Q7Z3T8
0.350255	3.44797	2.37561	0.0276532	0.369436	ENSG00000181523.12	FALSE	ENSG00000181523	17	SGSH	protein_coding	5562	N-sulfoglucosamine sulfohydrolase [Source:HGNC Symbol;Acc:HGNC:10818]	6448	P51688	P51688
0.15493	5.56969	2.37487	0.0276964	0.369436	ENSG00000168610.14	FALSE	ENSG00000168610	17	STAT3	protein_coding	5047	signal transducer and activator of transcription 3 [Source:HGNC Symbol;Acc:HGNC:11364]	6774	P40763	P40763
-0.230647	3.62848	-2.37484	0.0276983	0.369436	ENSG00000203499.11	FALSE	ENSG00000203499	8	IQANK1	protein_coding	2737	IQ motif and ankyrin repeat containing 1 [Source:HGNC Symbol;Acc:HGNC:49576]	100128338	#N/A	#N/A
0.160639	6.69165	2.37472	0.0277048	0.369436	ENSG00000116977.18	FALSE	ENSG00000116977	1	LGALS8	protein_coding	6420	galectin 8 [Source:HGNC Symbol;Acc:HGNC:6569]	3964	O00214	O00214
0.140344	5.48093	2.37388	0.0277541	0.369715	ENSG00000067066.16	FALSE	ENSG00000067066	2	SP100	protein_coding	3882	SP100 nuclear antigen [Source:HGNC Symbol;Acc:HGNC:11206]	6672	P23497	P23497
-0.487894	0.678297	-2.37064	0.0279431	0.371722	ENSG00000213928.8	FALSE	ENSG00000213928	14	IRF9	protein_coding	1838	interferon regulatory factor 9 [Source:HGNC Symbol;Acc:HGNC:6131]	10379	Q00978	Q00978
-0.208683	3.76817	-2.36985	0.0279894	0.371722	ENSG00000065485.19	FALSE	ENSG00000065485	3	PDIA5	protein_coding	2232	protein disulfide isomerase family A member 5 [Source:HGNC Symbol;Acc:HGNC:24811]	10954	Q14554	Q14554
0.255738	5.01456	2.36983	0.0279901	0.371722	ENSG00000120963.11	FALSE	ENSG00000120963	8	ZNF706	protein_coding	3502	zinc finger protein 706 [Source:HGNC Symbol;Acc:HGNC:24992]	51123	Q9Y5V0	Q9Y5V0
-0.181533	5.00685	-2.36792	0.0281024	0.372834	ENSG00000100605.16	FALSE	ENSG00000100605	14	ITPK1	protein_coding	6066	inositol-tetrakisphosphate 1-kinase [Source:HGNC Symbol;Acc:HGNC:6177]	3705	A0A024R6H3	A0A024R6H3
-0.394814	1.84383	-2.36667	0.0281763	0.372999	ENSG00000185361.8	FALSE	ENSG00000185361	19	TNFAIP8L1	protein_coding	3845	TNF alpha induced protein 8 like 1 [Source:HGNC Symbol;Acc:HGNC:28279]	126282	Q8WVP5	Q8WVP5
-0.280285	3.50554	-2.3659	0.0282215	0.372999	ENSG00000133265.10	FALSE	ENSG00000133265	19	HSPBP1	protein_coding	1768	HSPA _Hsp70_ binding protein 1 [Source:HGNC Symbol;Acc:HGNC:24989]	23640	Q9NZL4	Q9NZL4
-0.136032	8.28401	-2.3655	0.0282451	0.372999	ENSG00000138119.16	FALSE	ENSG00000138119	10	MYOF	protein_coding	6719	myoferlin [Source:HGNC Symbol;Acc:HGNC:3656]	26509	Q9NZM1	Q9NZM1
-0.273569	3.19565	-2.36513	0.0282675	0.372999	ENSG00000123191.14	FALSE	ENSG00000123191	13	ATP7B	protein_coding	6638	ATPase copper transporting beta [Source:HGNC Symbol;Acc:HGNC:870]	540	A0A024RDX3	A0A024RDX3
-0.151226	5.7792	-2.36464	0.028296	0.372999	ENSG00000003147.18	FALSE	ENSG00000003147	7	ICA1	protein_coding	2458	islet cell autoantigen 1 [Source:HGNC Symbol;Acc:HGNC:5343]	3382	A0A024RA29	A0A024RA29
-0.64754	-0.116023	-2.36458	0.0282999	0.372999	ENSG00000164764.10	FALSE	ENSG00000164764	8	SBSPON	protein_coding	3801	somatomedin B and thrombospondin type 1 domain containing [Source:HGNC Symbol;Acc:HGNC:30362]	157869	Q8IVN8	Q8IVN8
-0.140443	5.27154	-2.36433	0.0283146	0.372999	ENSG00000149257.14	FALSE	ENSG00000149257	11	SERPINH1	protein_coding	3523	serpin family H member 1 [Source:HGNC Symbol;Acc:HGNC:1546]	871	A0A024R5K8	A0A024R5K8
-0.227116	3.81229	-2.3623	0.028435	0.373441	ENSG00000147164.11	FALSE	ENSG00000147164	X	SNX12	protein_coding	2422	sorting nexin 12 [Source:HGNC Symbol;Acc:HGNC:14976]	29934	Q3SYF1	Q3SYF1
0.145265	3.99914	2.36223	0.0284391	0.373441	ENSG00000160570.13	FALSE	ENSG00000160570	19	DEDD2	protein_coding	1894	death effector domain containing 2 [Source:HGNC Symbol;Acc:HGNC:24450]	162989	Q8WXF8	Q8WXF8
0.291738	4.19643	2.36161	0.0284759	0.373441	ENSG00000265681.7	FALSE	ENSG00000265681	18	RPL17	protein_coding	914	ribosomal protein L17 [Source:HGNC Symbol;Acc:HGNC:10307]	6139	A0A024R261	A0A024R261
0.175561	5.01503	2.36144	0.0284864	0.373441	ENSG00000197822.10	FALSE	ENSG00000197822	5	OCLN	protein_coding	6438	occludin [Source:HGNC Symbol;Acc:HGNC:8104]	100506658	A8K3T2	A8K3T2
-0.180322	4.12773	-2.36136	0.028491	0.373441	ENSG00000137764.19	FALSE	ENSG00000137764	15	MAP2K5	protein_coding	2347	mitogen-activated protein kinase kinase 5 [Source:HGNC Symbol;Acc:HGNC:6845]	5607	Q13163	Q13163
-0.565962	3.67085	-2.35977	0.0285859	0.374179	ENSG00000276368.1	FALSE	ENSG00000276368	6	HIST1H2AJ	protein_coding	387	histone cluster 1 H2A family member j [Source:HGNC Symbol;Acc:HGNC:4727]	8331	Q99878	Q99878
-0.312553	2.37915	-2.35946	0.0286046	0.374179	ENSG00000267795.5	FALSE	ENSG00000267795	16	SMIM22	protein_coding	1047	small integral membrane protein 22 [Source:HGNC Symbol;Acc:HGNC:48329]	440335	A0A1U9AC72	A0A1U9AC72
0.124399	7.86073	2.35851	0.0286613	0.374441	ENSG00000125398.6	FALSE	ENSG00000125398	17	SOX9	protein_coding	3935	SRY-box 9 [Source:HGNC Symbol;Acc:HGNC:11204]	6662	P48436	P48436
-0.186676	4.15113	-2.35746	0.0287243	0.374441	ENSG00000124496.12	FALSE	ENSG00000124496	6	TRERF1	protein_coding	7646	transcriptional regulating factor 1 [Source:HGNC Symbol;Acc:HGNC:18273]	55809	Q05GC8	Q05GC8
0.264983	3.75309	2.35575	0.0288271	0.374441	ENSG00000163577.7	FALSE	ENSG00000163577	3	EIF5A2	protein_coding	5593	eukaryotic translation initiation factor 5A2 [Source:HGNC Symbol;Acc:HGNC:3301]	56648	Q9GZV4	Q9GZV4
0.137551	4.6117	2.35565	0.028833	0.374441	ENSG00000125450.10	FALSE	ENSG00000125450	17	NUP85	protein_coding	2233	nucleoporin 85 [Source:HGNC Symbol;Acc:HGNC:8734]	79902	Q9BW27	Q9BW27
-0.392711	3.86304	-2.35536	0.028851	0.374441	ENSG00000048342.15	FALSE	ENSG00000048342	4	CC2D2A	protein_coding	5249	coiled-coil and C2 domain containing 2A [Source:HGNC Symbol;Acc:HGNC:29253]	57545	Q9P2K1	Q9P2K1
0.630773	0.368596	2.35523	0.0288585	0.374441	ENSG00000277399.4	FALSE	ENSG00000277399	17	GPR179	protein_coding	7983	G protein-coupled receptor 179 [Source:HGNC Symbol;Acc:HGNC:31371]	440435	A0A087X0K8	A0A087X0K8
-0.347914	-0.534253	-2.35471	0.0288898	0.374441	ENSG00000166707.10	FALSE	ENSG00000166707	X	ZCCHC18	protein_coding	2941	zinc finger CCHC-type containing 18 [Source:HGNC Symbol;Acc:HGNC:32459]	644353	P0CG32	P0CG32
0.142507	4.29161	2.3545	0.0289026	0.374441	ENSG00000163900.10	FALSE	ENSG00000163900	3	TMEM41A	protein_coding	4921	transmembrane protein 41A [Source:HGNC Symbol;Acc:HGNC:30544]	90407	Q96HV5	Q96HV5
-0.132278	7.11559	-2.35379	0.0289456	0.374441	ENSG00000125378.15	FALSE	ENSG00000125378	14	BMP4	protein_coding	1917	bone morphogenetic protein 4 [Source:HGNC Symbol;Acc:HGNC:1071]	652	P12644	P12644
-0.268255	3.51532	-2.35356	0.0289593	0.374441	ENSG00000073536.17	FALSE	ENSG00000073536	17	NLE1	protein_coding	5286	notchless homolog 1 [Source:HGNC Symbol;Acc:HGNC:19889]	54475	Q9NVX2	Q9NVX2
-0.159159	5.61576	-2.35313	0.0289853	0.374441	ENSG00000185122.10	FALSE	ENSG00000185122	8	HSF1	protein_coding	3451	heat shock transcription factor 1 [Source:HGNC Symbol;Acc:HGNC:5224]	3297	Q00613	Q00613
-0.532185	3.05808	-2.35307	0.0289889	0.374441	ENSG00000276180.1	FALSE	ENSG00000276180	6	HIST1H4I	protein_coding	1294	histone cluster 1 H4 family member i [Source:HGNC Symbol;Acc:HGNC:4793]	8294	B2R4R0	B2R4R0
0.218785	3.45051	2.35196	0.0290562	0.374441	ENSG00000100124.14	FALSE	ENSG00000100124	22	ANKRD54	protein_coding	2403	ankyrin repeat domain 54 [Source:HGNC Symbol;Acc:HGNC:25185]	129138	Q6NXT1	Q6NXT1
0.367954	2.79958	2.35176	0.0290683	0.374441	ENSG00000102078.15	FALSE	ENSG00000102078	X	SLC25A14	protein_coding	1734	solute carrier family 25 member 14 [Source:HGNC Symbol;Acc:HGNC:10984]	9016	O95258	O95258
0.541981	1.35413	2.3515	0.0290846	0.374441	ENSG00000007968.6	FALSE	ENSG00000007968	1	E2F2	protein_coding	5191	E2F transcription factor 2 [Source:HGNC Symbol;Acc:HGNC:3114]	1870	Q14209	Q14209
-0.131035	6.26393	-2.35088	0.029122	0.374441	ENSG00000116478.11	FALSE	ENSG00000116478	1	HDAC1	protein_coding	2409	histone deacetylase 1 [Source:HGNC Symbol;Acc:HGNC:4852]	3065	Q13547	Q13547
0.173917	3.70854	2.3507	0.0291328	0.374441	ENSG00000197429.10	FALSE	ENSG00000197429	1	IPP	protein_coding	3113	intracisternal A particle-promoted polypeptide [Source:HGNC Symbol;Acc:HGNC:6108]	3652	Q9Y573	Q9Y573
-0.146125	4.98118	-2.35058	0.0291404	0.374441	ENSG00000150990.7	FALSE	ENSG00000150990	12	DHX37	protein_coding	4550	DEAH-box helicase 37 [Source:HGNC Symbol;Acc:HGNC:17210]	57647	Q8IY37	Q8IY37
0.349075	2.73755	2.34896	0.029239	0.37452	ENSG00000185112.5	FALSE	ENSG00000185112	3	FAM43A	protein_coding	2494	family with sequence similarity 43 member A [Source:HGNC Symbol;Acc:HGNC:26888]	131583	Q8N2R8	Q8N2R8
0.157391	5.13018	2.3475	0.0293285	0.37452	ENSG00000144635.8	FALSE	ENSG00000144635	3	DYNC1LI1	protein_coding	4791	dynein cytoplasmic 1 light intermediate chain 1 [Source:HGNC Symbol;Acc:HGNC:18745]	51143	E9PHI6	E9PHI6
0.139822	5.4822	2.34658	0.0293847	0.37452	ENSG00000135341.17	FALSE	ENSG00000135341	6	MAP3K7	protein_coding	4911	mitogen-activated protein kinase kinase kinase 7 [Source:HGNC Symbol;Acc:HGNC:6859]	6885	O43318	O43318
0.136651	6.53166	2.34647	0.0293916	0.37452	ENSG00000110422.11	FALSE	ENSG00000110422	11	HIPK3	protein_coding	7408	homeodomain interacting protein kinase 3 [Source:HGNC Symbol;Acc:HGNC:4915]	10114	Q9H422	Q9H422
0.133587	5.77743	2.34562	0.0294438	0.37452	ENSG00000009413.15	FALSE	ENSG00000009413	6	REV3L	protein_coding	10964	REV3 like, DNA directed polymerase zeta catalytic subunit [Source:HGNC Symbol;Acc:HGNC:9968]	5980	O60673	O60673
-0.234252	3.78355	-2.34553	0.0294488	0.37452	ENSG00000147124.12	FALSE	ENSG00000147124	X	ZNF41	protein_coding	4531	zinc finger protein 41 [Source:HGNC Symbol;Acc:HGNC:13107]	7592	P51814	P51814
0.276516	3.32882	2.34528	0.0294643	0.37452	ENSG00000065268.10	FALSE	ENSG00000065268	19	WDR18	protein_coding	1608	WD repeat domain 18 [Source:HGNC Symbol;Acc:HGNC:17956]	57418	Q9BV38	Q9BV38
0.312217	3.93119	2.34432	0.0295237	0.37452	ENSG00000113595.14	FALSE	ENSG00000113595	5	TRIM23	protein_coding	4186	tripartite motif containing 23 [Source:HGNC Symbol;Acc:HGNC:660]	373	P36406	P36406
-0.118956	5.72289	-2.34368	0.029563	0.37452	ENSG00000059573.8	FALSE	ENSG00000059573	10	ALDH18A1	protein_coding	3359	aldehyde dehydrogenase 18 family member A1 [Source:HGNC Symbol;Acc:HGNC:9722]	5832	P54886	P54886
-0.0846287	8.776	-2.34344	0.0295779	0.37452	ENSG00000147140.15	FALSE	ENSG00000147140	X	NONO	protein_coding	3215	non-POU domain containing octamer binding [Source:HGNC Symbol;Acc:HGNC:7871]	4841	A0A0S2Z4Z9	A0A0S2Z4Z9
0.615217	0.36271	2.34319	0.0295935	0.37452	ENSG00000198729.4	FALSE	ENSG00000198729	6	PPP1R14C	protein_coding	2152	protein phosphatase 1 regulatory inhibitor subunit 14C [Source:HGNC Symbol;Acc:HGNC:14952]	81706	Q8TAE6	Q8TAE6
0.180588	4.91234	2.34309	0.0295995	0.37452	ENSG00000173166.17	FALSE	ENSG00000173166	2	RAPH1	protein_coding	9808	Ras association _RalGDS/AF-6_ and pleckstrin homology domains 1 [Source:HGNC Symbol;Acc:HGNC:14436]	65059	Q70E73	Q70E73
-0.143387	6.10862	-2.34264	0.0296274	0.37452	ENSG00000100266.18	FALSE	ENSG00000100266	22	PACSIN2	protein_coding	3249	protein kinase C and casein kinase substrate in neurons 2 [Source:HGNC Symbol;Acc:HGNC:8571]	11252	Q9UNF0	Q9UNF0
-0.11654	6.66975	-2.34242	0.029641	0.37452	ENSG00000171552.12	FALSE	ENSG00000171552	20	BCL2L1	protein_coding	2610	BCL2 like 1 [Source:HGNC Symbol;Acc:HGNC:992]	598	Q07817	Q07817
-0.256167	4.7321	-2.34207	0.0296623	0.37452	ENSG00000183734.4	FALSE	ENSG00000183734	11	ASCL2	protein_coding	1852	achaete-scute family bHLH transcription factor 2 [Source:HGNC Symbol;Acc:HGNC:739]	430	Q99929	Q99929
-0.348939	1.33103	-2.3415	0.0296977	0.37452	ENSG00000148219.16	FALSE	ENSG00000148219	9	ASTN2	protein_coding	4747	astrotactin 2 [Source:HGNC Symbol;Acc:HGNC:17021]	23245	B7ZKP4	B7ZKP4
0.155956	5.62096	2.34137	0.0297055	0.37452	ENSG00000141084.10	FALSE	ENSG00000141084	16	RANBP10	protein_coding	5341	RAN binding protein 10 [Source:HGNC Symbol;Acc:HGNC:29285]	57610	Q6VN20	Q6VN20
-0.181524	5.13458	-2.34097	0.0297306	0.37452	ENSG00000108375.12	FALSE	ENSG00000108375	17	RNF43	protein_coding	5575	ring finger protein 43 [Source:HGNC Symbol;Acc:HGNC:18505]	54894	Q68DV7	Q68DV7
0.259897	4.44109	2.3406	0.0297535	0.37452	ENSG00000174840.8	FALSE	ENSG00000174840	3	PDE12	protein_coding	8773	phosphodiesterase 12 [Source:HGNC Symbol;Acc:HGNC:25386]	201626	F6T1Q0	F6T1Q0
0.323994	2.64204	2.34057	0.0297556	0.37452	ENSG00000156500.15	FALSE	ENSG00000156500	X	FAM122C	protein_coding	2598	family with sequence similarity 122C [Source:HGNC Symbol;Acc:HGNC:25202]	159091	Q6P4D5	Q6P4D5
0.351635	2.67546	2.33969	0.0298097	0.37452	ENSG00000145386.9	FALSE	ENSG00000145386	4	CCNA2	protein_coding	2797	cyclin A2 [Source:HGNC Symbol;Acc:HGNC:1578]	890	P20248	P20248
-0.262465	4.128	-2.33951	0.0298214	0.37452	ENSG00000163913.11	FALSE	ENSG00000163913	3	IFT122	protein_coding	4532	intraflagellar transport 122 [Source:HGNC Symbol;Acc:HGNC:13556]	55764	Q9HBG6	Q9HBG6
0.275129	2.83092	2.33922	0.0298392	0.37452	ENSG00000165730.15	FALSE	ENSG00000165730	10	STOX1	protein_coding	3630	storkhead box 1 [Source:HGNC Symbol;Acc:HGNC:23508]	219736	Q6ZVD7	Q6ZVD7
0.178726	4.50477	2.33909	0.0298472	0.37452	ENSG00000198554.11	FALSE	ENSG00000198554	14	WDHD1	protein_coding	5996	WD repeat and HMG-box DNA binding protein 1 [Source:HGNC Symbol;Acc:HGNC:23170]	11169	O75717	O75717
-0.152448	6.61547	-2.3388	0.0298655	0.37452	ENSG00000130147.15	FALSE	ENSG00000130147	2	SH3BP4	protein_coding	5231	SH3 domain binding protein 4 [Source:HGNC Symbol;Acc:HGNC:10826]	23677	Q9P0V3	Q9P0V3
-0.098968	6.48403	-2.33838	0.0298917	0.37452	ENSG00000106443.16	FALSE	ENSG00000106443	7	PHF14	protein_coding	9869	PHD finger protein 14 [Source:HGNC Symbol;Acc:HGNC:22203]	9678	B4DG57	B4DG57
-0.141724	5.75039	-2.33694	0.0299816	0.375132	ENSG00000125753.13	FALSE	ENSG00000125753	19	VASP	protein_coding	2305	vasodilator stimulated phosphoprotein [Source:HGNC Symbol;Acc:HGNC:12652]	7408	A0A024R0V4	A0A024R0V4
-0.521968	1.03277	-2.33667	0.029998	0.375132	ENSG00000105388.15	FALSE	ENSG00000105388	19	CEACAM5	protein_coding	2874	carcinoembryonic antigen related cell adhesion molecule 5 [Source:HGNC Symbol;Acc:HGNC:1817]	1048	A0A024R0K5	A0A024R0K5
0.203294	3.67701	2.33572	0.0300574	0.375224	ENSG00000213462.4	FALSE	ENSG00000213462	7	ERV3-1	protein_coding	2719	endogenous retrovirus group 3 member 1, envelope [Source:HGNC Symbol;Acc:HGNC:3454]	2086	Q14264	Q14264
-0.162098	5.97585	-2.33521	0.0300898	0.375224	ENSG00000122642.10	FALSE	ENSG00000122642	7	FKBP9	protein_coding	3621	FK506 binding protein 9 [Source:HGNC Symbol;Acc:HGNC:3725]	11328	A7YQ73	A7YQ73
0.166156	3.96053	2.33489	0.03011	0.375224	ENSG00000140320.11	FALSE	ENSG00000140320	15	BAHD1	protein_coding	4698	bromo adjacent homology domain containing 1 [Source:HGNC Symbol;Acc:HGNC:29153]	22893	Q8TBE0	Q8TBE0
0.223778	4.53373	2.33472	0.0301201	0.375224	ENSG00000169155.9	FALSE	ENSG00000169155	9	ZBTB43	protein_coding	5965	zinc finger and BTB domain containing 43 [Source:HGNC Symbol;Acc:HGNC:17908]	23099	O43298	O43298
0.23974	4.09632	2.33319	0.0302167	0.375885	ENSG00000123485.11	FALSE	ENSG00000123485	2	HJURP	protein_coding	3187	Holliday junction recognition protein [Source:HGNC Symbol;Acc:HGNC:25444]	55355	Q8NCD3	Q8NCD3
-0.179874	4.77934	-2.33294	0.0302322	0.375885	ENSG00000104872.10	FALSE	ENSG00000104872	19	PIH1D1	protein_coding	1192	PIH1 domain containing 1 [Source:HGNC Symbol;Acc:HGNC:26075]	55011	Q9NWS0	Q9NWS0
0.176251	5.51156	2.33251	0.0302595	0.375885	ENSG00000131375.9	FALSE	ENSG00000131375	3	CAPN7	protein_coding	4353	calpain 7 [Source:HGNC Symbol;Acc:HGNC:1484]	23473	Q7Z479	Q7Z479
0.176108	5.3674	2.33178	0.0303053	0.376096	ENSG00000166946.13	FALSE	ENSG00000166946	15	CCNDBP1	protein_coding	3660	cyclin D1 binding protein 1 [Source:HGNC Symbol;Acc:HGNC:1587]	23582	O95273	O95273
0.171235	4.54869	2.33106	0.0303506	0.376301	ENSG00000123737.12	FALSE	ENSG00000123737	4	EXOSC9	protein_coding	3882	exosome component 9 [Source:HGNC Symbol;Acc:HGNC:9137]	5393	Q06265	Q06265
-0.149324	5.73896	-2.32945	0.0304526	0.376621	ENSG00000043143.20	FALSE	ENSG00000043143	5	JADE2	protein_coding	6465	jade family PHD finger 2 [Source:HGNC Symbol;Acc:HGNC:22984]	23338	A0A0C4DFT8	A0A0C4DFT8
-0.15502	5.63967	-2.32908	0.0304761	0.376621	ENSG00000167085.11	FALSE	ENSG00000167085	17	PHB	protein_coding	1952	prohibitin [Source:HGNC Symbol;Acc:HGNC:8912]	5245	A8K401	A8K401
-0.217288	3.7261	-2.32874	0.0304975	0.376621	ENSG00000204922.4	FALSE	ENSG00000204922	11	UQCC3	protein_coding	2288	ubiquinol-cytochrome c reductase complex assembly factor 3 [Source:HGNC Symbol;Acc:HGNC:34399]	790955	Q6UW78	Q6UW78
-0.189282	2.7797	-2.32843	0.0305174	0.376621	ENSG00000121316.10	FALSE	ENSG00000121316	12	PLBD1	protein_coding	2426	phospholipase B domain containing 1 [Source:HGNC Symbol;Acc:HGNC:26215]	79887	Q6P4A8	Q6P4A8
-0.24934	3.27635	-2.3283	0.0305259	0.376621	ENSG00000181350.11	FALSE	ENSG00000181350	17	LRRC75A	protein_coding	3157	leucine rich repeat containing 75A [Source:HGNC Symbol;Acc:HGNC:32403]	388341	B7ZMA3	B7ZMA3
-0.152543	4.73106	-2.32793	0.0305493	0.376621	ENSG00000110711.9	FALSE	ENSG00000110711	11	AIP	protein_coding	1221	aryl hydrocarbon receptor interacting protein [Source:HGNC Symbol;Acc:HGNC:358]	9049	O00170	O00170
-0.212032	4.69489	-2.32591	0.030678	0.377836	ENSG00000144579.7	FALSE	ENSG00000144579	2	CTDSP1	protein_coding	2638	CTD small phosphatase 1 [Source:HGNC Symbol;Acc:HGNC:21614]	58190	Q9GZU7	Q9GZU7
0.285524	3.11468	2.32541	0.0307095	0.377836	ENSG00000139880.19	FALSE	ENSG00000139880	14	CDH24	protein_coding	3552	cadherin 24 [Source:HGNC Symbol;Acc:HGNC:14265]	64403	Q86UP0	Q86UP0
0.33275	2.27242	2.32502	0.0307346	0.377836	ENSG00000102871.15	FALSE	ENSG00000102871	16	TRADD	protein_coding	1877	TNFRSF1A associated via death domain [Source:HGNC Symbol;Acc:HGNC:12030]	8717	Q15628	Q15628
-0.162394	10.4773	-2.32405	0.0307967	0.378243	ENSG00000109971.13	FALSE	ENSG00000109971	11	HSPA8	protein_coding	2463	heat shock protein family A _Hsp70_ member 8 [Source:HGNC Symbol;Acc:HGNC:5241]	3312	P11142	P11142
-0.210184	4.3158	-2.32246	0.0308987	0.378577	ENSG00000034152.18	FALSE	ENSG00000034152	17	MAP2K3	protein_coding	2401	mitogen-activated protein kinase kinase 3 [Source:HGNC Symbol;Acc:HGNC:6843]	5606	P46734	P46734
-0.125616	7.45298	-2.32231	0.0309083	0.378577	ENSG00000168003.16	FALSE	ENSG00000168003	11	SLC3A2	protein_coding	2222	solute carrier family 3 member 2 [Source:HGNC Symbol;Acc:HGNC:11026]	6520	J3KPF3	J3KPF3
0.190001	3.45564	2.32227	0.0309108	0.378577	ENSG00000156239.11	FALSE	ENSG00000156239	21	N6AMT1	protein_coding	4865	N-6 adenine-specific DNA methyltransferase 1 [Source:HGNC Symbol;Acc:HGNC:16021]	29104	Q9Y5N5	Q9Y5N5
-0.224888	3.9594	-2.31915	0.0311121	0.379797	ENSG00000076944.15	FALSE	ENSG00000076944	19	STXBP2	protein_coding	1974	syntaxin binding protein 2 [Source:HGNC Symbol;Acc:HGNC:11445]	6813	Q15833	Q15833
-0.20951	5.1318	-2.31806	0.0311826	0.379797	ENSG00000149476.15	FALSE	ENSG00000149476	11	TKFC	protein_coding	4696	triokinase and FMN cyclase [Source:HGNC Symbol;Acc:HGNC:24552]	26007	A0A140VJH7	A0A140VJH7
-0.366666	1.98872	-2.31785	0.0311961	0.379797	ENSG00000164778.4	FALSE	ENSG00000164778	7	EN2	protein_coding	3395	engrailed homeobox 2 [Source:HGNC Symbol;Acc:HGNC:3343]	2020	P19622	P19622
-0.701236	1.1673	-2.31743	0.0312234	0.379797	ENSG00000158486.13	FALSE	ENSG00000158486	16	DNAH3	protein_coding	12394	dynein axonemal heavy chain 3 [Source:HGNC Symbol;Acc:HGNC:2949]	55567	B4E1S1	B4E1S1
0.184119	5.89903	2.31721	0.0312375	0.379797	ENSG00000113810.15	FALSE	ENSG00000113810	3	SMC4	protein_coding	5471	structural maintenance of chromosomes 4 [Source:HGNC Symbol;Acc:HGNC:14013]	10051	Q58F29	Q58F29
-0.164195	5.40356	-2.31686	0.0312606	0.379797	ENSG00000167600.13	FALSE	ENSG00000167600	19	CYP2S1	protein_coding	2782	cytochrome P450 family 2 subfamily S member 1 [Source:HGNC Symbol;Acc:HGNC:15654]	29785	Q96SQ9	Q96SQ9
0.193738	4.67316	2.31681	0.0312636	0.379797	ENSG00000160445.10	FALSE	ENSG00000160445	9	ZER1	protein_coding	4259	zyg-11 related cell cycle regulator [Source:HGNC Symbol;Acc:HGNC:30960]	10444	A0A024R8B0	A0A024R8B0
-0.397463	2.38033	-2.31576	0.0313319	0.379797	ENSG00000074219.13	FALSE	ENSG00000074219	19	TEAD2	protein_coding	2440	TEA domain transcription factor 2 [Source:HGNC Symbol;Acc:HGNC:11715]	8463	A0A024QZE2	A0A024QZE2
-0.159478	4.58064	-2.3157	0.0313362	0.379797	ENSG00000125485.17	FALSE	ENSG00000125485	9	DDX31	protein_coding	4577	DEAD-box helicase 31 [Source:HGNC Symbol;Acc:HGNC:16715]	64794	Q9H8H2	Q9H8H2
-0.208081	3.83796	-2.31426	0.0314295	0.379797	ENSG00000101546.12	FALSE	ENSG00000101546	18	RBFA	protein_coding	1587	ribosome binding factor A [Source:HGNC Symbol;Acc:HGNC:26120]	79863	Q8N0V3	Q8N0V3
-0.21082	4.83964	-2.31416	0.0314363	0.379797	ENSG00000100242.15	FALSE	ENSG00000100242	22	SUN2	protein_coding	4055	Sad1 and UNC84 domain containing 2 [Source:HGNC Symbol;Acc:HGNC:14210]	25777	B4E2A6	B4E2A6
-0.260291	3.96882	-2.31408	0.0314413	0.379797	ENSG00000186205.12	FALSE	ENSG00000186205	1	MARC1	protein_coding	7439	mitochondrial amidoxime reducing component 1 [Source:HGNC Symbol;Acc:HGNC:26189]	64757	Q5VT66	Q5VT66
0.172751	4.32441	2.314	0.0314465	0.379797	ENSG00000047346.12	FALSE	ENSG00000047346	15	FAM214A	protein_coding	4590	family with sequence similarity 214 member A [Source:HGNC Symbol;Acc:HGNC:25609]	56204	Q32MH5	Q32MH5
-0.923208	-1.14145	-2.31302	0.0315105	0.379797	ENSG00000154589.6	FALSE	ENSG00000154589	8	LY96	protein_coding	607	lymphocyte antigen 96 [Source:HGNC Symbol;Acc:HGNC:17156]	23643	Q9Y6Y9	Q9Y6Y9
0.134459	5.34721	2.31273	0.0315296	0.379797	ENSG00000059588.9	FALSE	ENSG00000059588	1	TARBP1	protein_coding	5130	TAR _HIV-1_ RNA binding protein 1 [Source:HGNC Symbol;Acc:HGNC:11568]	6894	Q13395	Q13395
-0.159559	6.77711	-2.31252	0.0315436	0.379797	ENSG00000116584.17	FALSE	ENSG00000116584	1	ARHGEF2	protein_coding	4438	Rho/Rac guanine nucleotide exchange factor 2 [Source:HGNC Symbol;Acc:HGNC:682]	9181	Q92974	Q92974
-0.272029	2.76478	-2.31236	0.031554	0.379797	ENSG00000101464.10	FALSE	ENSG00000101464	20	PIGU	protein_coding	1632	phosphatidylinositol glycan anchor biosynthesis class U [Source:HGNC Symbol;Acc:HGNC:15791]	128869	Q9H490	Q9H490
-0.458538	1.03883	-2.3123	0.0315581	0.379797	ENSG00000186529.15	FALSE	ENSG00000186529	19	CYP4F3	protein_coding	5050	cytochrome P450 family 4 subfamily F member 3 [Source:HGNC Symbol;Acc:HGNC:2646]	4051	A0A024R7J8	A0A024R7J8
-0.191859	5.88175	-2.3118	0.0315908	0.379797	ENSG00000126457.21	FALSE	ENSG00000126457	19	PRMT1	protein_coding	1686	protein arginine methyltransferase 1 [Source:HGNC Symbol;Acc:HGNC:5187]	3276	A0A087X1W2	A0A087X1W2
-0.679697	1.02797	-2.31106	0.0316391	0.379797	ENSG00000099957.16	FALSE	ENSG00000099957	22	P2RX6	protein_coding	3687	purinergic receptor P2X 6 [Source:HGNC Symbol;Acc:HGNC:8538]	9127	O15547	O15547
-0.12709	5.43113	-2.31036	0.0316854	0.379797	ENSG00000115694.14	FALSE	ENSG00000115694	2	STK25	protein_coding	4619	serine/threonine kinase 25 [Source:HGNC Symbol;Acc:HGNC:11404]	10494	A0A024R4B2	A0A024R4B2
0.161996	5.52129	2.31023	0.0316937	0.379797	ENSG00000151893.14	FALSE	ENSG00000151893	10	CACUL1	protein_coding	11311	CDK2 associated cullin domain 1 [Source:HGNC Symbol;Acc:HGNC:23727]	143384	Q86Y37	Q86Y37
0.104235	6.07489	2.31021	0.0316949	0.379797	ENSG00000119638.12	FALSE	ENSG00000119638	14	NEK9	protein_coding	8310	NIMA related kinase 9 [Source:HGNC Symbol;Acc:HGNC:18591]	91754	Q8TD19	Q8TD19
0.354659	3.66735	2.3098	0.031722	0.379797	ENSG00000138795.9	FALSE	ENSG00000138795	4	LEF1	protein_coding	3477	lymphoid enhancer binding factor 1 [Source:HGNC Symbol;Acc:HGNC:6551]	51176	Q659G9	Q659G9
-0.128154	6.91869	-2.30957	0.0317369	0.379797	ENSG00000213585.10	FALSE	ENSG00000213585	5	VDAC1	protein_coding	1953	voltage dependent anion channel 1 [Source:HGNC Symbol;Acc:HGNC:12669]	7416	A0A1L1UHR1	A0A1L1UHR1
0.160109	6.10235	2.30865	0.0317976	0.380175	ENSG00000012822.15	FALSE	ENSG00000012822	12	CALCOCO1	protein_coding	5866	calcium binding and coiled-coil domain 1 [Source:HGNC Symbol;Acc:HGNC:29306]	57658	Q9P1Z2	Q9P1Z2
0.286403	2.87595	2.30442	0.0320778	0.383003	ENSG00000198814.12	FALSE	ENSG00000198814	X	GK	protein_coding	4573	glycerol kinase [Source:HGNC Symbol;Acc:HGNC:4289]	2710	B4DH54	B4DH54
0.213793	6.50581	2.3042	0.0320927	0.383003	ENSG00000152332.15	FALSE	ENSG00000152332	1	UHMK1	protein_coding	8478	U2AF homology motif kinase 1 [Source:HGNC Symbol;Acc:HGNC:19683]	127933	Q8TAS1	Q8TAS1
-0.16222	5.22564	-2.30315	0.0321626	0.383486	ENSG00000110090.12	FALSE	ENSG00000110090	11	CPT1A	protein_coding	5232	carnitine palmitoyltransferase 1A [Source:HGNC Symbol;Acc:HGNC:2328]	1374	P50416	P50416
-0.890494	-1.44245	-2.30186	0.032249	0.383838	ENSG00000111405.8	FALSE	ENSG00000111405	12	ENDOU	protein_coding	2413	endonuclease, poly_U_ specific [Source:HGNC Symbol;Acc:HGNC:14369]	8909	P21128	P21128
-0.222797	5.30886	-2.30183	0.0322508	0.383838	ENSG00000139211.6	FALSE	ENSG00000139211	12	AMIGO2	protein_coding	3763	adhesion molecule with Ig like domain 2 [Source:HGNC Symbol;Acc:HGNC:24073]	347902	A0A024R127	A0A024R127
-0.317514	2.53412	-2.30066	0.0323288	0.384296	ENSG00000135119.14	FALSE	ENSG00000135119	12	RNFT2	protein_coding	3882	ring finger protein, transmembrane 2 [Source:HGNC Symbol;Acc:HGNC:25905]	84900	Q96EX2	Q96EX2
-0.303175	3.02922	-2.30037	0.0323481	0.384296	ENSG00000170631.14	FALSE	ENSG00000170631	8	ZNF16	protein_coding	2616	zinc finger protein 16 [Source:HGNC Symbol;Acc:HGNC:12947]	7564	P17020	P17020
-0.410848	2.72859	-2.29937	0.0324156	0.384748	ENSG00000179958.8	FALSE	ENSG00000179958	16	DCTPP1	protein_coding	1222	dCTP pyrophosphatase 1 [Source:HGNC Symbol;Acc:HGNC:28777]	79077	Q9H773	Q9H773
0.342724	3.81571	2.29733	0.0325526	0.385769	ENSG00000106546.13	FALSE	ENSG00000106546	7	AHR	protein_coding	6958	aryl hydrocarbon receptor [Source:HGNC Symbol;Acc:HGNC:348]	196	A0A024R9Z8	A0A024R9Z8
0.139203	5.91078	2.29689	0.0325823	0.385769	ENSG00000159459.11	FALSE	ENSG00000159459	15	UBR1	protein_coding	7761	ubiquitin protein ligase E3 component n-recognin 1 [Source:HGNC Symbol;Acc:HGNC:16808]	197131	Q8IWV7	Q8IWV7
0.109897	7.45436	2.29677	0.0325902	0.385769	ENSG00000164733.20	FALSE	ENSG00000164733	8	CTSB	protein_coding	3875	cathepsin B [Source:HGNC Symbol;Acc:HGNC:2527]	1508	Q5HYG5	Q5HYG5
-0.918423	-0.757045	-2.29622	0.0326278	0.385803	ENSG00000161133.16	FALSE	ENSG00000161133	22	USP41	protein_coding	1188	ubiquitin specific peptidase 41 [Source:HGNC Symbol;Acc:HGNC:20070]	373856	#N/A	#N/A
0.267667	2.21599	2.29551	0.0326756	0.385803	ENSG00000062370.16	FALSE	ENSG00000062370	19	ZNF112	protein_coding	3654	zinc finger protein 112 [Source:HGNC Symbol;Acc:HGNC:12892]	7771	Q9UJU3	Q9UJU3
-0.323108	3.73098	-2.29542	0.0326816	0.385803	ENSG00000184675.10	FALSE	ENSG00000184675	X	AMER1	protein_coding	8443	APC membrane recruitment protein 1 [Source:HGNC Symbol;Acc:HGNC:26837]	139285	Q5JTC6	Q5JTC6
-0.238016	3.85655	-2.29428	0.0327588	0.386364	ENSG00000100142.14	FALSE	ENSG00000100142	22	POLR2F	protein_coding	2106	RNA polymerase II subunit F [Source:HGNC Symbol;Acc:HGNC:9193]	5435	B0QYL9	B0QYL9
0.13613	4.95141	2.29358	0.0328063	0.386517	ENSG00000129071.9	FALSE	ENSG00000129071	3	MBD4	protein_coding	2478	methyl-CpG binding domain 4, DNA glycosylase [Source:HGNC Symbol;Acc:HGNC:6919]	8930	O95243	O95243
1.13983	-1.32647	2.29322	0.0328309	0.386517	ENSG00000182791.4	FALSE	ENSG00000182791	11	CCDC87	protein_coding	2908	coiled-coil domain containing 87 [Source:HGNC Symbol;Acc:HGNC:25579]	55231	Q9NVE4	Q9NVE4
0.102242	5.66789	2.29198	0.0329154	0.387163	ENSG00000132383.11	FALSE	ENSG00000132383	17	RPA1	protein_coding	4340	replication protein A1 [Source:HGNC Symbol;Acc:HGNC:10289]	6117	P27694	P27694
0.598724	-0.0435051	2.29138	0.0329563	0.387296	ENSG00000255872.3	FALSE	ENSG00000255872	9	AL138752.2	protein_coding	2591	novel transcript	#N/A	#N/A	#N/A
-0.190231	4.62636	-2.29067	0.0330049	0.387518	ENSG00000130733.10	FALSE	ENSG00000130733	19	YIPF2	protein_coding	2087	Yip1 domain family member 2 [Source:HGNC Symbol;Acc:HGNC:28476]	78992	A0A024R7E1	A0A024R7E1
-0.467	0.153453	-2.28839	0.0331602	0.388278	ENSG00000182379.9	FALSE	ENSG00000182379	12	NXPH4	protein_coding	2007	neurexophilin 4 [Source:HGNC Symbol;Acc:HGNC:8078]	11247	O95158	O95158
-0.24634	5.61078	-2.28808	0.0331818	0.388278	ENSG00000159335.15	FALSE	ENSG00000159335	12	PTMS	protein_coding	1150	parathymosin [Source:HGNC Symbol;Acc:HGNC:9629]	5763	F5GXR3	F5GXR3
0.135969	4.91663	2.2879	0.0331939	0.388278	ENSG00000096717.11	FALSE	ENSG00000096717	10	SIRT1	protein_coding	4094	sirtuin 1 [Source:HGNC Symbol;Acc:HGNC:14929]	23411	A8K128	A8K128
0.800287	0.23625	2.28729	0.0332358	0.388278	ENSG00000162641.18	FALSE	ENSG00000162641	1	AKNAD1	protein_coding	3053	AKNA domain containing 1 [Source:HGNC Symbol;Acc:HGNC:28398]	254268	Q5T1N1	Q5T1N1
0.182701	5.25679	2.28726	0.033238	0.388278	ENSG00000198824.6	FALSE	ENSG00000198824	13	CHAMP1	protein_coding	5122	chromosome alignment maintaining phosphoprotein 1 [Source:HGNC Symbol;Acc:HGNC:20311]	283489	Q96JM3	Q96JM3
-0.14569	11.0626	-2.28685	0.0332664	0.388278	ENSG00000142541.16	FALSE	ENSG00000142541	19	RPL13A	protein_coding	2312	ribosomal protein L13a [Source:HGNC Symbol;Acc:HGNC:10304]	23521	P40429	P40429
-0.222658	4.0868	-2.28665	0.03328	0.388278	ENSG00000020256.19	FALSE	ENSG00000020256	20	ZFP64	protein_coding	3264	ZFP64 zinc finger protein [Source:HGNC Symbol;Acc:HGNC:15940]	55734	Q9NTW7	Q9NTW7
-0.237837	3.43468	-2.28625	0.0333073	0.388278	ENSG00000188493.14	FALSE	ENSG00000188493	19	C19ORF54	protein_coding	2753	chromosome 19 open reading frame 54 [Source:HGNC Symbol;Acc:HGNC:24758]	284325	Q5BKX5	Q5BKX5
-0.400956	2.37715	-2.28563	0.0333505	0.388436	ENSG00000063761.15	FALSE	ENSG00000063761	14	ADCK1	protein_coding	3560	aarF domain containing kinase 1 [Source:HGNC Symbol;Acc:HGNC:19038]	57143	Q86TW2	Q86TW2
-0.922582	0.643981	-2.27994	0.0337445	0.391972	ENSG00000150051.13	FALSE	ENSG00000150051	10	MKX	protein_coding	3846	mohawk homeobox [Source:HGNC Symbol;Acc:HGNC:23729]	283078	Q8IYA7	Q8IYA7
-0.213285	6.70045	-2.27985	0.0337511	0.391972	ENSG00000106665.15	FALSE	ENSG00000106665	7	CLIP2	protein_coding	5563	CAP-Gly domain containing linker protein 2 [Source:HGNC Symbol;Acc:HGNC:2586]	7461	A0A140VJG6	A0A140VJG6
-0.833485	-0.114296	-2.27965	0.0337651	0.391972	ENSG00000104728.15	FALSE	ENSG00000104728	8	ARHGEF10	protein_coding	5648	Rho guanine nucleotide exchange factor 10 [Source:HGNC Symbol;Acc:HGNC:14103]	9639	O15013	O15013
-0.220455	5.38991	-2.27952	0.0337741	0.391972	ENSG00000136717.14	FALSE	ENSG00000136717	2	BIN1	protein_coding	5141	bridging integrator 1 [Source:HGNC Symbol;Acc:HGNC:1052]	274	A0A024RAG9	A0A024RAG9
0.518821	1.00624	2.27827	0.0338611	0.392348	ENSG00000125657.4	FALSE	ENSG00000125657	19	TNFSF9	protein_coding	1665	TNF superfamily member 9 [Source:HGNC Symbol;Acc:HGNC:11939]	8744	A0A0U5J8I0	A0A0U5J8I0
-0.317818	2.83386	-2.27819	0.0338666	0.392348	ENSG00000113356.11	FALSE	ENSG00000113356	5	POLR3G	protein_coding	3285	RNA polymerase III subunit G [Source:HGNC Symbol;Acc:HGNC:30075]	10622	A0A024RAM1	A0A024RAM1
-0.139647	5.93911	-2.27702	0.0339486	0.39236	ENSG00000082458.11	FALSE	ENSG00000082458	X	DLG3	protein_coding	6112	discs large MAGUK scaffold protein 3 [Source:HGNC Symbol;Acc:HGNC:2902]	1741	Q92796	Q92796
0.182997	4.66543	2.27637	0.0339941	0.39236	ENSG00000156671.13	FALSE	ENSG00000156671	10	SAMD8	protein_coding	6935	sterile alpha motif domain containing 8 [Source:HGNC Symbol;Acc:HGNC:26320]	142891	Q96LT4	Q96LT4
-0.250814	2.85771	-2.2761	0.0340129	0.39236	ENSG00000100379.17	FALSE	ENSG00000100379	22	KCTD17	protein_coding	1763	potassium channel tetramerization domain containing 17 [Source:HGNC Symbol;Acc:HGNC:25705]	79734	Q8N5Z5	Q8N5Z5
-0.169054	5.32761	-2.27598	0.0340215	0.39236	ENSG00000146007.10	FALSE	ENSG00000146007	5	ZMAT2	protein_coding	1647	zinc finger matrin-type 2 [Source:HGNC Symbol;Acc:HGNC:26433]	153527	Q96NC0	Q96NC0
0.232882	3.5498	2.27574	0.0340386	0.39236	ENSG00000168297.15	FALSE	ENSG00000168297	3	PXK	protein_coding	3035	PX domain containing serine/threonine kinase like [Source:HGNC Symbol;Acc:HGNC:23326]	54899	A0A0C4DG95	A0A0C4DG95
0.192043	6.81361	2.27561	0.0340478	0.39236	ENSG00000155096.13	FALSE	ENSG00000155096	8	AZIN1	protein_coding	4721	antizyme inhibitor 1 [Source:HGNC Symbol;Acc:HGNC:16432]	51582	B3KTF6	B3KTF6
-0.170303	5.05177	-2.27501	0.0340894	0.392493	ENSG00000104980.7	FALSE	ENSG00000104980	19	TIMM44	protein_coding	2227	translocase of inner mitochondrial membrane 44 [Source:HGNC Symbol;Acc:HGNC:17316]	10469	O43615	O43615
-0.364369	1.63768	-2.27358	0.0341903	0.392563	ENSG00000067113.16	FALSE	ENSG00000067113	5	PLPP1	protein_coding	1597	phospholipid phosphatase 1 [Source:HGNC Symbol;Acc:HGNC:9228]	8611	A0A024QZS3	A0A024QZS3
0.13764	5.36536	2.27332	0.0342088	0.392563	ENSG00000108854.15	FALSE	ENSG00000108854	17	SMURF2	protein_coding	5892	SMAD specific E3 ubiquitin protein ligase 2 [Source:HGNC Symbol;Acc:HGNC:16809]	64750	Q96DE7	Q96DE7
-0.124537	4.6123	-2.27308	0.0342258	0.392563	ENSG00000104047.14	FALSE	ENSG00000104047	15	DTWD1	protein_coding	13776	DTW domain containing 1 [Source:HGNC Symbol;Acc:HGNC:30926]	56986	Q8N5C7	Q8N5C7
0.144448	3.69664	2.27259	0.0342604	0.392563	ENSG00000196597.11	FALSE	ENSG00000196597	9	ZNF782	protein_coding	4213	zinc finger protein 782 [Source:HGNC Symbol;Acc:HGNC:33110]	158431	Q6ZMW2	Q6ZMW2
-0.134427	7.366	-2.27218	0.0342891	0.392563	ENSG00000102144.14	FALSE	ENSG00000102144	X	PGK1	protein_coding	4887	phosphoglycerate kinase 1 [Source:HGNC Symbol;Acc:HGNC:8896]	5230	P00558	P00558
-0.263101	3.63316	-2.27212	0.0342933	0.392563	ENSG00000103152.11	FALSE	ENSG00000103152	16	MPG	protein_coding	1205	N-methylpurine DNA glycosylase [Source:HGNC Symbol;Acc:HGNC:7211]	4350	P29372	P29372
0.204026	4.90671	2.27195	0.0343057	0.392563	ENSG00000188177.13	FALSE	ENSG00000188177	2	ZC3H6	protein_coding	11542	zinc finger CCCH-type containing 6 [Source:HGNC Symbol;Acc:HGNC:24762]	376940	P61129	P61129
-0.139542	5.23655	-2.27016	0.0344324	0.393545	ENSG00000175792.11	FALSE	ENSG00000175792	3	RUVBL1	protein_coding	4062	RuvB like AAA ATPase 1 [Source:HGNC Symbol;Acc:HGNC:10474]	8607	Q9Y265	Q9Y265
-0.114616	7.88597	-2.26989	0.0344517	0.393545	ENSG00000155506.16	FALSE	ENSG00000155506	5	LARP1	protein_coding	6595	La ribonucleoprotein domain family member 1 [Source:HGNC Symbol;Acc:HGNC:29531]	23367	Q6PKG0	Q6PKG0
0.156401	5.11815	2.2689	0.0345216	0.393709	ENSG00000134108.12	FALSE	ENSG00000134108	3	ARL8B	protein_coding	3005	ADP ribosylation factor like GTPase 8B [Source:HGNC Symbol;Acc:HGNC:25564]	55207	A0A024R2D4	A0A024R2D4
0.123543	5.45649	2.26881	0.034528	0.393709	ENSG00000164402.13	FALSE	ENSG00000164402	5	SEPT8	protein_coding	4394	septin 8 [Source:HGNC Symbol;Acc:HGNC:16511]	23176	Q92599	Q92599
-0.440953	0.915167	-2.26745	0.0346253	0.393709	ENSG00000085662.13	FALSE	ENSG00000085662	7	AKR1B1	protein_coding	1930	aldo-keto reductase family 1 member B [Source:HGNC Symbol;Acc:HGNC:381]	231	A0A024R7A8	A0A024R7A8
-1.28168	-0.941054	-2.26736	0.0346315	0.393709	ENSG00000086696.10	FALSE	ENSG00000086696	16	HSD17B2	protein_coding	7925	hydroxysteroid 17-beta dehydrogenase 2 [Source:HGNC Symbol;Acc:HGNC:5211]	3294	P37059	P37059
0.326606	2.36399	2.26729	0.0346366	0.393709	ENSG00000112796.9	FALSE	ENSG00000112796	6	ENPP5	protein_coding	3834	ectonucleotide pyrophosphatase/phosphodiesterase 5 _putative_ [Source:HGNC Symbol;Acc:HGNC:13717]	59084	Q9UJA9	Q9UJA9
0.139675	5.54266	2.26715	0.0346469	0.393709	ENSG00000119684.15	FALSE	ENSG00000119684	14	MLH3	protein_coding	7896	mutL homolog 3 [Source:HGNC Symbol;Acc:HGNC:7128]	27030	Q9UHC1	Q9UHC1
-0.974133	-1.57188	-2.26659	0.0346868	0.393821	ENSG00000166143.9	FALSE	ENSG00000166143	15	PPP1R14D	protein_coding	757	protein phosphatase 1 regulatory inhibitor subunit 14D [Source:HGNC Symbol;Acc:HGNC:14953]	54866	E9PAT1	E9PAT1
-0.22221	4.70513	-2.26547	0.0347665	0.394172	ENSG00000040633.12	FALSE	ENSG00000040633	17	PHF23	protein_coding	2037	PHD finger protein 23 [Source:HGNC Symbol;Acc:HGNC:28428]	79142	Q9BUL5	Q9BUL5
0.182207	4.51161	2.26531	0.0347781	0.394172	ENSG00000068724.15	FALSE	ENSG00000068724	2	TTC7A	protein_coding	5157	tetratricopeptide repeat domain 7A [Source:HGNC Symbol;Acc:HGNC:19750]	57217	Q9ULT0	Q9ULT0
-0.161177	7.91055	-2.26285	0.0349546	0.395829	ENSG00000203485.12	FALSE	ENSG00000203485	14	INF2	protein_coding	7578	inverted formin, FH2 and WH2 domain containing [Source:HGNC Symbol;Acc:HGNC:23791]	64423	Q27J81	Q27J81
0.101385	6.37912	2.26129	0.0350673	0.396761	ENSG00000134744.13	FALSE	ENSG00000134744	1	TUT4	protein_coding	5858	terminal uridylyl transferase 4 [Source:HGNC Symbol;Acc:HGNC:28981]	23318	A0A0C4DFM7	A0A0C4DFM7
0.172677	3.5924	2.26086	0.0350984	0.39677	ENSG00000081014.10	FALSE	ENSG00000081014	15	AP4E1	protein_coding	6758	adaptor related protein complex 4 subunit epsilon 1 [Source:HGNC Symbol;Acc:HGNC:573]	23431	B4DM48	B4DM48
-0.228166	3.97224	-2.25895	0.0352369	0.397767	ENSG00000163393.12	FALSE	ENSG00000163393	1	SLC22A15	protein_coding	4720	solute carrier family 22 member 15 [Source:HGNC Symbol;Acc:HGNC:20301]	55356	Q8IZD6	Q8IZD6
-0.107518	5.78464	-2.2586	0.035262	0.397767	ENSG00000099956.19	FALSE	ENSG00000099956	22	SMARCB1	protein_coding	5210	SWI/SNF related, matrix associated, actin dependent regulator of chromatin, subfamily b, member 1 [Source:HGNC Symbol;Acc:HGNC:11103]	6598	Q12824	Q12824
-0.16321	4.68456	-2.25838	0.035278	0.397767	ENSG00000158863.21	FALSE	ENSG00000158863	8	FAM160B2	protein_coding	4245	family with sequence similarity 160 member B2 [Source:HGNC Symbol;Acc:HGNC:16492]	64760	Q86V87	Q86V87
-0.217044	3.4902	-2.25559	0.0354812	0.399714	ENSG00000146409.11	FALSE	ENSG00000146409	6	SLC18B1	protein_coding	2421	solute carrier family 18 member B1 [Source:HGNC Symbol;Acc:HGNC:21573]	116843	Q6NT16	Q6NT16
-0.204025	3.81655	-2.25472	0.0355446	0.399746	ENSG00000185917.13	FALSE	ENSG00000185917	21	SETD4	protein_coding	4272	SET domain containing 4 [Source:HGNC Symbol;Acc:HGNC:1258]	54093	Q9NVD3	Q9NVD3
0.550812	0.823522	2.25403	0.0355951	0.399746	ENSG00000186132.14	FALSE	ENSG00000186132	2	C2ORF76	protein_coding	1150	chromosome 2 open reading frame 76 [Source:HGNC Symbol;Acc:HGNC:27017]	130355	Q3KRA6	Q3KRA6
-0.121752	7.0435	-2.25396	0.0356001	0.399746	ENSG00000170004.16	FALSE	ENSG00000170004	17	CHD3	protein_coding	7356	chromodomain helicase DNA binding protein 3 [Source:HGNC Symbol;Acc:HGNC:1918]	1107	B3KWV4	B3KWV4
-0.750534	-0.718725	-2.25374	0.0356163	0.399746	ENSG00000205744.9	FALSE	ENSG00000205744	19	DENND1C	protein_coding	2933	DENN domain containing 1C [Source:HGNC Symbol;Acc:HGNC:26225]	79958	Q8IV53	Q8IV53
-0.243617	2.49548	-2.25315	0.0356596	0.399746	ENSG00000054277.13	FALSE	ENSG00000054277	1	OPN3	protein_coding	2620	opsin 3 [Source:HGNC Symbol;Acc:HGNC:14007]	23596	Q9H1Y3	Q9H1Y3
-0.275679	2.00568	-2.25304	0.0356676	0.399746	ENSG00000103876.12	FALSE	ENSG00000103876	15	FAH	protein_coding	3427	fumarylacetoacetate hydrolase [Source:HGNC Symbol;Acc:HGNC:3579]	2184	P16930	P16930
0.243209	4.15411	2.25262	0.0356982	0.399747	ENSG00000151553.14	FALSE	ENSG00000151553	10	FAM160B1	protein_coding	5810	family with sequence similarity 160 member B1 [Source:HGNC Symbol;Acc:HGNC:29320]	57700	Q5W0V3	Q5W0V3
-0.797126	-0.391883	-2.25097	0.0358196	0.400318	ENSG00000135472.8	FALSE	ENSG00000135472	12	FAIM2	protein_coding	4654	Fas apoptotic inhibitory molecule 2 [Source:HGNC Symbol;Acc:HGNC:17067]	23017	Q9BWQ8	Q9BWQ8
0.159427	4.39056	2.25075	0.0358355	0.400318	ENSG00000137210.13	FALSE	ENSG00000137210	6	TMEM14B	protein_coding	1589	transmembrane protein 14B [Source:HGNC Symbol;Acc:HGNC:21384]	81853	Q9NUH8	Q9NUH8
-0.18205	3.85387	-2.25068	0.0358411	0.400318	ENSG00000155592.15	FALSE	ENSG00000155592	16	ZKSCAN2	protein_coding	7523	zinc finger with KRAB and SCAN domains 2 [Source:HGNC Symbol;Acc:HGNC:25677]	342357	Q63HK3	Q63HK3
-0.257659	3.02485	-2.25026	0.0358719	0.400319	ENSG00000108641.15	FALSE	ENSG00000108641	17	B9D1	protein_coding	1353	B9 domain containing 1 [Source:HGNC Symbol;Acc:HGNC:24123]	27077	B4DEW0	B4DEW0
0.163457	5.04769	2.2493	0.0359427	0.400322	ENSG00000108433.16	FALSE	ENSG00000108433	17	GOSR2	protein_coding	3964	golgi SNAP receptor complex member 2 [Source:HGNC Symbol;Acc:HGNC:4431]	9570	O14653	O14653
-0.334431	2.89295	-2.24902	0.0359632	0.400322	ENSG00000235106.9	FALSE	ENSG00000235106	9	BRD3OS	protein_coding	5722	BRD3 opposite strand [Source:HGNC Symbol;Acc:HGNC:24742]	266655	#N/A	#N/A
0.610099	0.206957	2.24824	0.0360207	0.400322	ENSG00000123080.10	FALSE	ENSG00000123080	1	CDKN2C	protein_coding	2904	cyclin dependent kinase inhibitor 2C [Source:HGNC Symbol;Acc:HGNC:1789]	1031	P42773	P42773
0.180196	5.18384	2.248	0.036039	0.400322	ENSG00000162695.11	FALSE	ENSG00000162695	1	SLC30A7	protein_coding	7898	solute carrier family 30 member 7 [Source:HGNC Symbol;Acc:HGNC:19306]	148867	Q8NEW0	Q8NEW0
0.289114	2.16819	2.24795	0.0360425	0.400322	ENSG00000167604.14	FALSE	ENSG00000167604	19	NFKBID	protein_coding	1834	NFKB inhibitor delta [Source:HGNC Symbol;Acc:HGNC:15671]	84807	Q8NI38	Q8NI38
0.127105	5.40675	2.24701	0.0361121	0.400322	ENSG00000135541.20	FALSE	ENSG00000135541	6	AHI1	protein_coding	5921	Abelson helper integration site 1 [Source:HGNC Symbol;Acc:HGNC:21575]	54806	Q8N157	Q8N157
-0.255527	3.92153	-2.24685	0.0361243	0.400322	ENSG00000079462.7	FALSE	ENSG00000079462	19	PAFAH1B3	protein_coding	1098	platelet activating factor acetylhydrolase 1b catalytic subunit 3 [Source:HGNC Symbol;Acc:HGNC:8576]	5050	A0A024R0L6	A0A024R0L6
-0.636973	0.234418	-2.24681	0.0361272	0.400322	ENSG00000174939.10	FALSE	ENSG00000174939	16	ASPHD1	protein_coding	1732	aspartate beta-hydroxylase domain containing 1 [Source:HGNC Symbol;Acc:HGNC:27380]	253982	Q5U4P2	Q5U4P2
-0.169762	4.82776	-2.24653	0.0361478	0.400322	ENSG00000143294.14	FALSE	ENSG00000143294	1	PRCC	protein_coding	2105	proline rich mitotic checkpoint control factor [Source:HGNC Symbol;Acc:HGNC:9343]	5546	A0A0S2Z456	A0A0S2Z456
0.154376	3.90282	2.24562	0.0362156	0.4006	ENSG00000108528.13	FALSE	ENSG00000108528	17	SLC25A11	protein_coding	2176	solute carrier family 25 member 11 [Source:HGNC Symbol;Acc:HGNC:10981]	8402	Q6IBH0	Q6IBH0
0.330132	2.94988	2.24537	0.0362343	0.4006	ENSG00000242259.8	FALSE	ENSG00000242259	22	C22ORF39	protein_coding	3350	chromosome 22 open reading frame 39 [Source:HGNC Symbol;Acc:HGNC:27012]	128977	Q6P5X5	Q6P5X5
-0.125792	9.12829	-2.24325	0.0363918	0.401567	ENSG00000142192.20	FALSE	ENSG00000142192	21	APP	protein_coding	3543	amyloid beta precursor protein [Source:HGNC Symbol;Acc:HGNC:620]	351	A0A140VJC8	A0A140VJC8
0.334456	2.11099	2.24317	0.0363976	0.401567	ENSG00000148835.10	FALSE	ENSG00000148835	10	TAF5	protein_coding	3268	TATA-box binding protein associated factor 5 [Source:HGNC Symbol;Acc:HGNC:11539]	6877	Q15542	Q15542
0.218363	3.5985	2.24263	0.0364386	0.401567	ENSG00000196290.14	FALSE	ENSG00000196290	2	NIF3L1	protein_coding	1680	NGG1 interacting factor 3 like 1 [Source:HGNC Symbol;Acc:HGNC:13390]	60491	A0A024R3V7	A0A024R3V7
-0.338626	2.32971	-2.24254	0.0364446	0.401567	ENSG00000183048.11	FALSE	ENSG00000183048	17	SLC25A10	protein_coding	1946	solute carrier family 25 member 10 [Source:HGNC Symbol;Acc:HGNC:10980]	1468	A0A0S2Z3G3	A0A0S2Z3G3
-0.16848	6.69255	-2.24168	0.0365095	0.401942	ENSG00000106123.11	FALSE	ENSG00000106123	7	EPHB6	protein_coding	4409	EPH receptor B6 [Source:HGNC Symbol;Acc:HGNC:3396]	2051	J3KQU5	J3KQU5
-0.192527	4.02849	-2.23958	0.0366671	0.403172	ENSG00000122592.7	FALSE	ENSG00000122592	7	HOXA7	protein_coding	2018	homeobox A7 [Source:HGNC Symbol;Acc:HGNC:5108]	3204	P31268	P31268
-0.587084	-0.296972	-2.23828	0.0367651	0.403172	ENSG00000153233.12	FALSE	ENSG00000153233	12	PTPRR	protein_coding	3529	protein tyrosine phosphatase, receptor type R [Source:HGNC Symbol;Acc:HGNC:9680]	5801	Q15256	Q15256
-0.172295	8.66966	-2.23779	0.0368015	0.403172	ENSG00000171863.14	FALSE	ENSG00000171863	2	RPS7	protein_coding	5429	ribosomal protein S7 [Source:HGNC Symbol;Acc:HGNC:10440]	6201	P62081	P62081
0.798489	0.357876	2.23735	0.0368351	0.403172	ENSG00000145244.11	FALSE	ENSG00000145244	4	CORIN	protein_coding	5378	corin, serine peptidase [Source:HGNC Symbol;Acc:HGNC:19012]	10699	A0A087X1D5	A0A087X1D5
-0.159354	5.78368	-2.23722	0.0368452	0.403172	ENSG00000214530.9	FALSE	ENSG00000214530	11	STARD10	protein_coding	1963	StAR related lipid transfer domain containing 10 [Source:HGNC Symbol;Acc:HGNC:10666]	10809	A0A024R5L8	A0A024R5L8
-0.2436	3.83139	-2.23703	0.0368591	0.403172	ENSG00000125821.12	FALSE	ENSG00000125821	20	DTD1	protein_coding	4112	D-tyrosyl-tRNA deacylase 1 [Source:HGNC Symbol;Acc:HGNC:16219]	92675	Q8TEA8	Q8TEA8
-0.167835	6.43587	-2.23559	0.0369682	0.403172	ENSG00000166888.11	FALSE	ENSG00000166888	12	STAT6	protein_coding	4034	signal transducer and activator of transcription 6 [Source:HGNC Symbol;Acc:HGNC:11368]	6778	P42226	P42226
0.254678	2.1958	2.23552	0.0369733	0.403172	ENSG00000250571.6	FALSE	ENSG00000250571	8	GLI4	protein_coding	2333	GLI family zinc finger 4 [Source:HGNC Symbol;Acc:HGNC:4320]	2738	P10075	P10075
-0.153684	5.28964	-2.23551	0.0369741	0.403172	ENSG00000169727.12	FALSE	ENSG00000169727	17	GPS1	protein_coding	4076	G protein pathway suppressor 1 [Source:HGNC Symbol;Acc:HGNC:4549]	2873	Q13098	Q13098
0.21294	4.3868	2.23518	0.0369991	0.403172	ENSG00000146842.16	FALSE	ENSG00000146842	7	TMEM209	protein_coding	3545	transmembrane protein 209 [Source:HGNC Symbol;Acc:HGNC:21898]	84928	Q96SK2	Q96SK2
0.176527	5.36653	2.2345	0.0370508	0.403172	ENSG00000149218.4	FALSE	ENSG00000149218	11	ENDOD1	protein_coding	4687	endonuclease domain containing 1 [Source:HGNC Symbol;Acc:HGNC:29129]	23052	O94919	O94919
-0.25296	2.3169	-2.23446	0.0370536	0.403172	ENSG00000205464.12	FALSE	ENSG00000205464	5	ATP6AP1L	protein_coding	3524	ATPase H+ transporting accessory protein 1 like [Source:HGNC Symbol;Acc:HGNC:28091]	92270	A0A024RAQ7	A0A024RAQ7
-0.282551	3.61964	-2.23444	0.0370551	0.403172	ENSG00000186153.16	FALSE	ENSG00000186153	16	WWOX	protein_coding	2482	WW domain containing oxidoreductase [Source:HGNC Symbol;Acc:HGNC:12799]	51741	Q9NZC7	Q9NZC7
-0.575953	-0.776504	-2.23342	0.0371326	0.403172	ENSG00000213658.11	FALSE	ENSG00000213658	16	LAT	protein_coding	2443	linker for activation of T cells [Source:HGNC Symbol;Acc:HGNC:18874]	27040	O43561	O43561
-0.367297	2.56506	-2.23338	0.0371361	0.403172	ENSG00000128228.4	FALSE	ENSG00000128228	22	SDF2L1	protein_coding	865	stromal cell derived factor 2 like 1 [Source:HGNC Symbol;Acc:HGNC:10676]	23753	Q9HCN8	Q9HCN8
0.21952	3.96366	2.23312	0.0371553	0.403172	ENSG00000167904.14	FALSE	ENSG00000167904	8	TMEM68	protein_coding	4512	transmembrane protein 68 [Source:HGNC Symbol;Acc:HGNC:26510]	137695	Q96MH6	Q96MH6
0.176841	5.80905	2.23297	0.0371671	0.403172	ENSG00000100519.11	FALSE	ENSG00000100519	14	PSMC6	protein_coding	2939	proteasome 26S subunit, ATPase 6 [Source:HGNC Symbol;Acc:HGNC:9553]	5706	A0A087X2I1	A0A087X2I1
0.562098	-1.49436	2.23285	0.0371765	0.403172	ENSG00000141655.16	FALSE	ENSG00000141655	18	TNFRSF11A	protein_coding	8147	TNF receptor superfamily member 11a [Source:HGNC Symbol;Acc:HGNC:11908]	8792	Q9Y6Q6	Q9Y6Q6
-0.195597	4.48459	-2.23107	0.0373118	0.403803	ENSG00000180626.9	FALSE	ENSG00000180626	17	ZNF594	protein_coding	4862	zinc finger protein 594 [Source:HGNC Symbol;Acc:HGNC:29392]	84622	Q6ZNC6	Q6ZNC6
0.197833	5.72214	2.23098	0.0373191	0.403803	ENSG00000211455.7	FALSE	ENSG00000211455	12	STK38L	protein_coding	5068	serine/threonine kinase 38 like [Source:HGNC Symbol;Acc:HGNC:17848]	23012	Q9Y2H1	Q9Y2H1
0.351557	2.59955	2.23078	0.0373343	0.403803	ENSG00000116678.19	FALSE	ENSG00000116678	1	LEPR	protein_coding	8227	leptin receptor [Source:HGNC Symbol;Acc:HGNC:6554]	3953	P48357	P48357
0.39407	2.6541	2.23019	0.0373794	0.403803	ENSG00000138678.10	FALSE	ENSG00000138678	4	GPAT3	protein_coding	2633	glycerol-3-phosphate acyltransferase 3 [Source:HGNC Symbol;Acc:HGNC:28157]	84803	A0A024RDG5	A0A024RDG5
-0.198643	3.43815	-2.23006	0.0373892	0.403803	ENSG00000064490.13	FALSE	ENSG00000064490	19	RFXANK	protein_coding	1407	regulatory factor X associated ankyrin containing protein [Source:HGNC Symbol;Acc:HGNC:9987]	8625	O14593	O14593
0.523557	0.151299	2.22805	0.0375434	0.405134	ENSG00000204099.11	FALSE	ENSG00000204099	2	NEU4	protein_coding	3013	neuraminidase 4 [Source:HGNC Symbol;Acc:HGNC:21328]	129807	B3KR54	B3KR54
0.163089	6.30075	2.22667	0.0376495	0.405906	ENSG00000132680.10	FALSE	ENSG00000132680	1	KHDC4	protein_coding	4499	KH domain containing 4, pre-mRNA splicing factor [Source:HGNC Symbol;Acc:HGNC:29145]	22889	Q7Z7F0	Q7Z7F0
0.141972	6.25938	2.22608	0.0376955	0.405906	ENSG00000023516.8	FALSE	ENSG00000023516	13	AKAP11	protein_coding	9920	A-kinase anchoring protein 11 [Source:HGNC Symbol;Acc:HGNC:369]	11215	Q9UKA4	Q9UKA4
-0.171774	4.33934	-2.22587	0.0377116	0.405906	ENSG00000147439.12	FALSE	ENSG00000147439	8	BIN3	protein_coding	3589	bridging integrator 3 [Source:HGNC Symbol;Acc:HGNC:1054]	55909	Q9NQY0	Q9NQY0
-0.261662	4.06752	-2.22518	0.0377645	0.405906	ENSG00000134057.14	FALSE	ENSG00000134057	5	CCNB1	protein_coding	2169	cyclin B1 [Source:HGNC Symbol;Acc:HGNC:1579]	891	P14635	P14635
0.185016	5.80998	2.2249	0.0377866	0.405906	ENSG00000163636.10	FALSE	ENSG00000163636	3	PSMD6	protein_coding	4583	proteasome 26S subunit, non-ATPase 6 [Source:HGNC Symbol;Acc:HGNC:9564]	9861	Q15008	Q15008
-0.126191	7.63266	-2.2247	0.0378013	0.405906	ENSG00000101210.11	FALSE	ENSG00000101210	20	EEF1A2	protein_coding	3996	eukaryotic translation elongation factor 1 alpha 2 [Source:HGNC Symbol;Acc:HGNC:3192]	1917	Q05639	Q05639
0.202173	4.55402	2.2236	0.0378868	0.406123	ENSG00000120868.13	FALSE	ENSG00000120868	12	APAF1	protein_coding	7055	apoptotic peptidase activating factor 1 [Source:HGNC Symbol;Acc:HGNC:576]	317	O14727	O14727
0.184186	3.80701	2.22322	0.0379162	0.406123	ENSG00000170264.12	FALSE	ENSG00000170264	2	FAM161A	protein_coding	4027	FAM161A, centrosomal protein [Source:HGNC Symbol;Acc:HGNC:25808]	84140	Q3B820	Q3B820
0.213776	2.37847	2.22274	0.0379537	0.406123	ENSG00000204516.9	FALSE	ENSG00000204516	6	MICB	protein_coding	2446	MHC class I polypeptide-related sequence B [Source:HGNC Symbol;Acc:HGNC:7091]	4277	B4DUT9	B4DUT9
0.349133	3.45157	2.22233	0.0379856	0.406123	ENSG00000135476.11	FALSE	ENSG00000135476	12	ESPL1	protein_coding	6665	extra spindle pole bodies like 1, separase [Source:HGNC Symbol;Acc:HGNC:16856]	9700	Q14674	Q14674
0.190518	4.8405	2.22164	0.0380393	0.406123	ENSG00000196428.12	FALSE	ENSG00000196428	3	TSC22D2	protein_coding	11154	TSC22 domain family member 2 [Source:HGNC Symbol;Acc:HGNC:29095]	9819	B4DN36	B4DN36
-0.184743	6.37298	-2.22063	0.0381173	0.406123	ENSG00000149115.13	FALSE	ENSG00000149115	11	TNKS1BP1	protein_coding	5952	tankyrase 1 binding protein 1 [Source:HGNC Symbol;Acc:HGNC:19081]	85456	A0A024R542	A0A024R542
-0.142308	5.02355	-2.22037	0.0381381	0.406123	ENSG00000170854.17	FALSE	ENSG00000170854	3	RIOX2	protein_coding	5347	ribosomal oxygenase 2 [Source:HGNC Symbol;Acc:HGNC:19441]	84864	Q8IUF8	Q8IUF8
-0.157628	4.22788	-2.21996	0.0381698	0.406123	ENSG00000188186.10	FALSE	ENSG00000188186	7	LAMTOR4	protein_coding	730	late endosomal/lysosomal adaptor, MAPK and MTOR activator 4 [Source:HGNC Symbol;Acc:HGNC:33772]	389541	Q0VGL1	Q0VGL1
-0.627377	0.658974	-2.21993	0.0381721	0.406123	ENSG00000280670.2	FALSE	ENSG00000280670	1	CCDC163	protein_coding	2229	coiled-coil domain containing 163 [Source:HGNC Symbol;Acc:HGNC:27003]	126661	#N/A	#N/A
-0.179763	5.581	-2.21971	0.0381893	0.406123	ENSG00000175309.14	FALSE	ENSG00000175309	5	PHYKPL	protein_coding	2780	5-phosphohydroxy-L-lysine phospho-lyase [Source:HGNC Symbol;Acc:HGNC:28249]	85007	Q8IUZ5	Q8IUZ5
-0.380515	2.29388	-2.21928	0.0382227	0.406123	ENSG00000156427.7	FALSE	ENSG00000156427	5	FGF18	protein_coding	1986	fibroblast growth factor 18 [Source:HGNC Symbol;Acc:HGNC:3674]	8817	O76093	O76093
-0.124401	5.9466	-2.21894	0.0382498	0.406123	ENSG00000169718.17	FALSE	ENSG00000169718	17	DUS1L	protein_coding	4456	dihydrouridine synthase 1 like [Source:HGNC Symbol;Acc:HGNC:30086]	64118	Q6P1R4	Q6P1R4
-0.338044	2.88589	-2.21881	0.03826	0.406123	ENSG00000213246.6	FALSE	ENSG00000213246	17	SUPT4H1	protein_coding	1643	SPT4 homolog, DSIF elongation factor subunit [Source:HGNC Symbol;Acc:HGNC:11467]	6827	P63272	P63272
-0.126628	6.89491	-2.21841	0.0382906	0.406123	ENSG00000135506.15	FALSE	ENSG00000135506	12	OS9	protein_coding	3870	OS9, endoplasmic reticulum lectin [Source:HGNC Symbol;Acc:HGNC:16994]	10956	Q13438	Q13438
-0.154808	7.12663	-2.218	0.0383227	0.406123	ENSG00000118705.16	FALSE	ENSG00000118705	20	RPN2	protein_coding	2515	ribophorin II [Source:HGNC Symbol;Acc:HGNC:10382]	6185	P04844	P04844
0.228782	3.7903	2.21792	0.0383289	0.406123	ENSG00000152778.8	FALSE	ENSG00000152778	10	IFIT5	protein_coding	4015	interferon induced protein with tetratricopeptide repeats 5 [Source:HGNC Symbol;Acc:HGNC:13328]	24138	Q13325	Q13325
0.20551	3.9087	2.2174	0.0383699	0.406123	ENSG00000188313.12	FALSE	ENSG00000188313	3	PLSCR1	protein_coding	2233	phospholipid scramblase 1 [Source:HGNC Symbol;Acc:HGNC:9092]	5359	O15162	O15162
-1.00417	-0.580005	-2.21726	0.0383809	0.406123	ENSG00000149557.13	FALSE	ENSG00000149557	11	FEZ1	protein_coding	4744	fasciculation and elongation protein zeta 1 [Source:HGNC Symbol;Acc:HGNC:3659]	9638	Q99689	Q99689
0.168468	3.69337	2.21587	0.0384899	0.406735	ENSG00000145414.8	FALSE	ENSG00000145414	4	NAF1	protein_coding	2329	nuclear assembly factor 1 ribonucleoprotein [Source:HGNC Symbol;Acc:HGNC:25126]	92345	Q96HR8	Q96HR8
0.486212	0.204751	2.21552	0.0385174	0.406735	ENSG00000152284.4	FALSE	ENSG00000152284	2	TCF7L1	protein_coding	2968	transcription factor 7 like 1 [Source:HGNC Symbol;Acc:HGNC:11640]	83439	Q9HCS4	Q9HCS4
-0.195907	4.56472	-2.21534	0.0385321	0.406735	ENSG00000144746.6	FALSE	ENSG00000144746	3	ARL6IP5	protein_coding	2101	ADP ribosylation factor like GTPase 6 interacting protein 5 [Source:HGNC Symbol;Acc:HGNC:16937]	10550	A0A024R371	A0A024R371
-0.200805	3.54875	-2.2147	0.0385822	0.406759	ENSG00000149260.16	FALSE	ENSG00000149260	11	CAPN5	protein_coding	4397	calpain 5 [Source:HGNC Symbol;Acc:HGNC:1482]	726	A0A140VKH4	A0A140VKH4
0.770134	-0.143847	2.21452	0.0385966	0.406759	ENSG00000188687.17	FALSE	ENSG00000188687	2	SLC4A5	protein_coding	6576	solute carrier family 4 member 5 [Source:HGNC Symbol;Acc:HGNC:18168]	57835	Q9BY07	Q9BY07
0.170082	5.21576	2.21355	0.0386728	0.407233	ENSG00000107959.15	FALSE	ENSG00000107959	10	PITRM1	protein_coding	3487	pitrilysin metallopeptidase 1 [Source:HGNC Symbol;Acc:HGNC:17663]	10531	Q5JRX3	Q5JRX3
-0.133172	6.27998	-2.21258	0.0387498	0.407367	ENSG00000100219.16	FALSE	ENSG00000100219	22	XBP1	protein_coding	2173	X-box binding protein 1 [Source:HGNC Symbol;Acc:HGNC:12801]	7494	P17861	P17861
-0.232837	3.58016	-2.2124	0.0387634	0.407367	ENSG00000141569.11	FALSE	ENSG00000141569	17	TRIM65	protein_coding	3439	tripartite motif containing 65 [Source:HGNC Symbol;Acc:HGNC:27316]	201292	Q6PJ69	Q6PJ69
-0.10982	7.77415	-2.21221	0.038779	0.407367	ENSG00000136153.19	FALSE	ENSG00000136153	13	LMO7	protein_coding	8237	LIM domain 7 [Source:HGNC Symbol;Acc:HGNC:6646]	4008	F8J2B5	F8J2B5
-0.286939	2.72501	-2.2114	0.0388428	0.407602	ENSG00000235173.6	FALSE	ENSG00000235173	8	HGH1	protein_coding	2531	HGH1 homolog [Source:HGNC Symbol;Acc:HGNC:24161]	51236	Q96BK8	Q96BK8
-0.813659	-0.739672	-2.21114	0.0388638	0.407602	ENSG00000130052.13	FALSE	ENSG00000130052	X	STARD8	protein_coding	4864	StAR related lipid transfer domain containing 8 [Source:HGNC Symbol;Acc:HGNC:19161]	9754	Q92502	Q92502
0.236362	3.60265	2.21073	0.0388958	0.407611	ENSG00000139505.11	FALSE	ENSG00000139505	13	MTMR6	protein_coding	5659	myotubularin related protein 6 [Source:HGNC Symbol;Acc:HGNC:7453]	9107	Q9Y217	Q9Y217
0.146088	6.13982	2.21033	0.0389283	0.407624	ENSG00000183530.13	FALSE	ENSG00000183530	22	PRR14L	protein_coding	10826	proline rich 14 like [Source:HGNC Symbol;Acc:HGNC:28738]	253143	Q5THK1	Q5THK1
0.154305	6.7204	2.20955	0.0389899	0.407943	ENSG00000110344.9	FALSE	ENSG00000110344	11	UBE4A	protein_coding	6103	ubiquitination factor E4A [Source:HGNC Symbol;Acc:HGNC:12499]	9354	Q14139	Q14139
0.138883	4.96009	2.20879	0.0390508	0.408253	ENSG00000115365.11	FALSE	ENSG00000115365	2	LANCL1	protein_coding	4781	LanC like 1 [Source:HGNC Symbol;Acc:HGNC:6508]	10314	O43813	O43813
-0.225508	3.0883	-2.20792	0.0391198	0.408647	ENSG00000141384.12	FALSE	ENSG00000141384	18	TAF4B	protein_coding	5260	TATA-box binding protein associated factor 4b [Source:HGNC Symbol;Acc:HGNC:11538]	6875	J3KTH2	J3KTH2
0.132274	3.8506	2.20732	0.0391675	0.408819	ENSG00000054116.11	FALSE	ENSG00000054116	1	TRAPPC3	protein_coding	2428	trafficking protein particle complex 3 [Source:HGNC Symbol;Acc:HGNC:19942]	27095	A0A087WWM0	A0A087WWM0
-0.227713	3.73767	-2.20653	0.0392306	0.40915	ENSG00000071243.15	FALSE	ENSG00000071243	7	ING3	protein_coding	3777	inhibitor of growth family member 3 [Source:HGNC Symbol;Acc:HGNC:14587]	54556	Q9NXR8	Q9NXR8
-0.386836	2.23091	-2.206	0.0392731	0.409267	ENSG00000165548.10	FALSE	ENSG00000165548	14	TMEM63C	protein_coding	5334	transmembrane protein 63C [Source:HGNC Symbol;Acc:HGNC:23787]	57156	A0A024R6B3	A0A024R6B3
-0.41955	3.27165	-2.20454	0.0393907	0.410165	ENSG00000168038.10	FALSE	ENSG00000168038	3	ULK4	protein_coding	4613	unc-51 like kinase 4 [Source:HGNC Symbol;Acc:HGNC:15784]	54986	Q96C45	Q96C45
0.225962	6.23754	2.20325	0.0394941	0.410915	ENSG00000174718.11	FALSE	ENSG00000174718	12	KIAA1551	protein_coding	6230	KIAA1551 [Source:HGNC Symbol;Acc:HGNC:25559]	55196	Q9HCM1	Q9HCM1
0.943337	-0.612555	2.20108	0.0396693	0.411813	ENSG00000172137.18	FALSE	ENSG00000172137	16	CALB2	protein_coding	1466	calbindin 2 [Source:HGNC Symbol;Acc:HGNC:1435]	794	A0A140VK08	A0A140VK08
0.159867	4.7267	2.20099	0.0396761	0.411813	ENSG00000087338.4	FALSE	ENSG00000087338	2	GMCL1	protein_coding	4191	germ cell-less, spermatogenesis associated 1 [Source:HGNC Symbol;Acc:HGNC:23843]	64395	Q53SE7	Q53SE7
-0.174281	5.6014	-2.20082	0.0396901	0.411813	ENSG00000167747.14	FALSE	ENSG00000167747	19	C19ORF48	protein_coding	1844	chromosome 19 open reading frame 48 [Source:HGNC Symbol;Acc:HGNC:29667]	84798	A0A024R4G9	A0A024R4G9
-0.118919	6.76399	-2.20062	0.0397065	0.411813	ENSG00000104904.12	FALSE	ENSG00000104904	19	OAZ1	protein_coding	2832	ornithine decarboxylase antizyme 1 [Source:HGNC Symbol;Acc:HGNC:8095]	4946	J3QQY4	J3QQY4
-0.273248	2.79011	-2.19872	0.0398605	0.412049	ENSG00000138030.12	FALSE	ENSG00000138030	2	KHK	protein_coding	2411	ketohexokinase [Source:HGNC Symbol;Acc:HGNC:6315]	3795	A0A140VJM6	A0A140VJM6
-0.203294	7.54433	-2.19842	0.0398843	0.412049	ENSG00000187837.3	FALSE	ENSG00000187837	6	HIST1H1C	protein_coding	642	histone cluster 1 H1 family member c [Source:HGNC Symbol;Acc:HGNC:4716]	3006	P16403	P16403
-0.298005	2.59115	-2.19819	0.039903	0.412049	ENSG00000176024.17	FALSE	ENSG00000176024	19	ZNF613	protein_coding	3419	zinc finger protein 613 [Source:HGNC Symbol;Acc:HGNC:25827]	79898	Q6PF04	Q6PF04
-0.155821	7.84711	-2.19809	0.0399112	0.412049	ENSG00000164587.12	FALSE	ENSG00000164587	5	RPS14	protein_coding	3119	ribosomal protein S14 [Source:HGNC Symbol;Acc:HGNC:10387]	6208	P62263	P62263
0.177567	7.78452	2.19809	0.0399116	0.412049	ENSG00000127914.16	FALSE	ENSG00000127914	7	AKAP9	protein_coding	12471	A-kinase anchoring protein 9 [Source:HGNC Symbol;Acc:HGNC:379]	10142	Q5GIA7	Q5GIA7
0.250675	2.82736	2.198	0.0399184	0.412049	ENSG00000143553.10	FALSE	ENSG00000143553	1	SNAPIN	protein_coding	1205	SNAP associated protein [Source:HGNC Symbol;Acc:HGNC:17145]	23557	O95295	O95295
-0.176154	6.11853	-2.19753	0.0399566	0.412117	ENSG00000213741.10	FALSE	ENSG00000213741	14	RPS29	protein_coding	7062	ribosomal protein S29 [Source:HGNC Symbol;Acc:HGNC:10419]	6235	P62273	P62273
0.219919	4.52076	2.19714	0.0399882	0.412118	ENSG00000173542.8	FALSE	ENSG00000173542	4	MOB1B	protein_coding	6963	MOB kinase activator 1B [Source:HGNC Symbol;Acc:HGNC:29801]	92597	Q7L9L4	Q7L9L4
-0.273661	4.79101	-2.19575	0.0401018	0.412198	ENSG00000009950.15	FALSE	ENSG00000009950	7	MLXIPL	protein_coding	3278	MLX interacting protein like [Source:HGNC Symbol;Acc:HGNC:12744]	51085	Q9NP71	Q9NP71
-0.139326	5.37105	-2.19511	0.0401541	0.412198	ENSG00000090316.15	FALSE	ENSG00000090316	4	MAEA	protein_coding	5371	macrophage erythroblast attacher [Source:HGNC Symbol;Acc:HGNC:13731]	10296	B3KRN7	B3KRN7
0.69997	0.57285	2.19489	0.0401721	0.412198	ENSG00000133048.12	FALSE	ENSG00000133048	1	CHI3L1	protein_coding	1920	chitinase 3 like 1 [Source:HGNC Symbol;Acc:HGNC:1932]	1116	A0A024R969	A0A024R969
-0.284719	2.37247	-2.1945	0.0402037	0.412198	ENSG00000186417.13	FALSE	ENSG00000186417	15	GLDN	protein_coding	4971	gliomedin [Source:HGNC Symbol;Acc:HGNC:29514]	342035	Q14DE1	Q14DE1
-0.906831	-0.858087	-2.19446	0.0402075	0.412198	ENSG00000196188.10	FALSE	ENSG00000196188	1	CTSE	protein_coding	2228	cathepsin E [Source:HGNC Symbol;Acc:HGNC:2530]	1510	B4DNU8	B4DNU8
-0.718971	0.739489	-2.1941	0.0402369	0.412198	ENSG00000198910.13	FALSE	ENSG00000198910	X	L1CAM	protein_coding	5141	L1 cell adhesion molecule [Source:HGNC Symbol;Acc:HGNC:6470]	3897	P32004	P32004
0.220548	1.84866	2.1939	0.0402529	0.412198	ENSG00000186577.13	FALSE	ENSG00000186577	6	SMIM29	protein_coding	1487	small integral membrane protein 29 [Source:HGNC Symbol;Acc:HGNC:1340]	221491	Q86T20	Q86T20
-0.185252	4.424	-2.19379	0.0402617	0.412198	ENSG00000093183.13	FALSE	ENSG00000093183	3	SEC22C	protein_coding	5955	SEC22 homolog C, vesicle trafficking protein [Source:HGNC Symbol;Acc:HGNC:16828]	9117	A0A024R2Q1	A0A024R2Q1
0.2317	3.97399	2.19357	0.0402799	0.412198	ENSG00000005436.13	FALSE	ENSG00000005436	2	GCFC2	protein_coding	4440	GC-rich sequence DNA-binding factor 2 [Source:HGNC Symbol;Acc:HGNC:1317]	6936	A4UHR0	A4UHR0
-0.324671	1.9298	-2.19235	0.04038	0.412457	ENSG00000142235.9	FALSE	ENSG00000142235	19	LMTK3	protein_coding	5113	lemur tyrosine kinase 3 [Source:HGNC Symbol;Acc:HGNC:19295]	114783	A0A0A0MQW5	A0A0A0MQW5
-0.631498	-0.61741	-2.19223	0.0403904	0.412457	ENSG00000155962.12	FALSE	ENSG00000155962	X	CLIC2	protein_coding	2655	chloride intracellular channel 2 [Source:HGNC Symbol;Acc:HGNC:2063]	1193	O15247	O15247
-0.714807	1.15356	-2.19207	0.0404029	0.412457	ENSG00000185499.16	FALSE	ENSG00000185499	1	MUC1	protein_coding	4170	mucin 1, cell surface associated [Source:HGNC Symbol;Acc:HGNC:7508]	4582	P15941	P15941
-0.136909	5.55049	-2.19157	0.0404444	0.412457	ENSG00000130119.15	FALSE	ENSG00000130119	X	GNL3L	protein_coding	2357	G protein nucleolar 3 like [Source:HGNC Symbol;Acc:HGNC:25553]	54552	A0A024R9Y6	A0A024R9Y6
-0.159908	4.85685	-2.19022	0.0405552	0.412457	ENSG00000156958.14	FALSE	ENSG00000156958	15	GALK2	protein_coding	5299	galactokinase 2 [Source:HGNC Symbol;Acc:HGNC:4119]	2585	Q01415	Q01415
-0.850566	2.15342	-2.18994	0.040579	0.412457	ENSG00000156510.12	FALSE	ENSG00000156510	10	HKDC1	protein_coding	3689	hexokinase domain containing 1 [Source:HGNC Symbol;Acc:HGNC:23302]	80201	B3KT70	B3KT70
0.322159	2.03523	2.18986	0.0405849	0.412457	ENSG00000254505.9	FALSE	ENSG00000254505	14	CHMP4A	protein_coding	1393	charged multivesicular body protein 4A [Source:HGNC Symbol;Acc:HGNC:20274]	29082	Q9BY43	Q9BY43
-0.165998	5.61928	-2.18966	0.0406013	0.412457	ENSG00000113048.16	FALSE	ENSG00000113048	5	MRPS27	protein_coding	4435	mitochondrial ribosomal protein S27 [Source:HGNC Symbol;Acc:HGNC:14512]	23107	Q6PKB3	Q6PKB3
-0.292492	0.162116	-2.18955	0.0406106	0.412457	ENSG00000112902.11	FALSE	ENSG00000112902	5	SEMA5A	protein_coding	11762	semaphorin 5A [Source:HGNC Symbol;Acc:HGNC:10736]	9037	Q13591	Q13591
-0.104284	10.649	-2.18943	0.0406208	0.412457	ENSG00000100316.15	FALSE	ENSG00000100316	22	RPL3	protein_coding	2108	ribosomal protein L3 [Source:HGNC Symbol;Acc:HGNC:10332]	6122	P39023	P39023
0.618722	0.135146	2.1888	0.040673	0.412528	ENSG00000117425.13	FALSE	ENSG00000117425	1	PTCH2	protein_coding	4298	patched 2 [Source:HGNC Symbol;Acc:HGNC:9586]	8643	Q9Y6C5	Q9Y6C5
-0.628695	1.29325	-2.18855	0.0406938	0.412528	ENSG00000005187.11	FALSE	ENSG00000005187	16	ACSM3	protein_coding	3311	acyl-CoA synthetase medium chain family member 3 [Source:HGNC Symbol;Acc:HGNC:10522]	6296	Q53FZ2	Q53FZ2
-0.196768	3.86617	-2.18804	0.040736	0.412528	ENSG00000121864.9	FALSE	ENSG00000121864	3	ZNF639	protein_coding	6064	zinc finger protein 639 [Source:HGNC Symbol;Acc:HGNC:30950]	51193	Q9UID6	Q9UID6
-0.403831	2.05854	-2.18782	0.0407541	0.412528	ENSG00000161692.17	FALSE	ENSG00000161692	17	DBF4B	protein_coding	2998	DBF4 zinc finger B [Source:HGNC Symbol;Acc:HGNC:17883]	80174	Q8NFT6	Q8NFT6
-0.80056	-0.00854771	-2.18723	0.0408031	0.412633	ENSG00000181444.12	FALSE	ENSG00000181444	7	ZNF467	protein_coding	2553	zinc finger protein 467 [Source:HGNC Symbol;Acc:HGNC:23154]	168544	C9JAX3	C9JAX3
0.284108	3.5852	2.18693	0.0408276	0.412633	ENSG00000108384.14	FALSE	ENSG00000108384	17	RAD51C	protein_coding	2591	RAD51 paralog C [Source:HGNC Symbol;Acc:HGNC:9820]	5889	O43502	O43502
-0.209734	4.21896	-2.18556	0.0409417	0.412719	ENSG00000140479.16	FALSE	ENSG00000140479	15	PCSK6	protein_coding	4409	proprotein convertase subtilisin/kexin type 6 [Source:HGNC Symbol;Acc:HGNC:8569]	5046	A2RQD9	A2RQD9
-0.790372	0.536017	-2.18478	0.0410067	0.412719	ENSG00000187134.13	FALSE	ENSG00000187134	10	AKR1C1	protein_coding	6705	aldo-keto reductase family 1 member C1 [Source:HGNC Symbol;Acc:HGNC:384]	1645	Q04828	Q04828
-0.545954	0.941152	-2.18415	0.0410586	0.412719	ENSG00000189283.9	FALSE	ENSG00000189283	3	FHIT	protein_coding	3063	fragile histidine triad [Source:HGNC Symbol;Acc:HGNC:3701]	2272	A0A024R366	A0A024R366
-0.228354	3.54648	-2.18374	0.0410932	0.412719	ENSG00000101213.6	FALSE	ENSG00000101213	20	PTK6	protein_coding	2931	protein tyrosine kinase 6 [Source:HGNC Symbol;Acc:HGNC:9617]	5753	Q13882	Q13882
-0.154668	4.98223	-2.18369	0.0410969	0.412719	ENSG00000132359.14	FALSE	ENSG00000132359	17	RAP1GAP2	protein_coding	6661	RAP1 GTPase activating protein 2 [Source:HGNC Symbol;Acc:HGNC:29176]	23108	Q684P5	Q684P5
0.30418	3.30545	2.18344	0.0411181	0.412719	ENSG00000121621.6	FALSE	ENSG00000121621	11	KIF18A	protein_coding	3568	kinesin family member 18A [Source:HGNC Symbol;Acc:HGNC:29441]	81930	Q8NI77	Q8NI77
-0.146372	6.55281	-2.18317	0.0411409	0.412719	ENSG00000179051.13	FALSE	ENSG00000179051	1	RCC2	protein_coding	4087	regulator of chromosome condensation 2 [Source:HGNC Symbol;Acc:HGNC:30297]	55920	A0A024RAC5	A0A024RAC5
-0.764226	1.16916	-2.18249	0.0411973	0.412719	ENSG00000107551.20	FALSE	ENSG00000107551	10	RASSF4	protein_coding	4350	Ras association domain family member 4 [Source:HGNC Symbol;Acc:HGNC:20793]	83937	Q9H2L5	Q9H2L5
0.313417	2.05718	2.18191	0.0412457	0.412719	ENSG00000005189.19	FALSE	ENSG00000005189	16	REXO5	protein_coding	2722	RNA exonuclease 5 [Source:HGNC Symbol;Acc:HGNC:24661]	81691	Q96IC2	Q96IC2
0.181798	7.02978	2.1819	0.041247	0.412719	ENSG00000061676.14	FALSE	ENSG00000061676	2	NCKAP1	protein_coding	20347	NCK associated protein 1 [Source:HGNC Symbol;Acc:HGNC:7666]	10787	Q9Y2A7	Q9Y2A7
0.179183	6.00784	2.18145	0.0412847	0.412719	ENSG00000139496.15	FALSE	ENSG00000139496	13	NUP58	protein_coding	6360	nucleoporin 58 [Source:HGNC Symbol;Acc:HGNC:20261]	9818	Q9BVL2	Q9BVL2
-0.889757	-1.2185	-2.18139	0.0412894	0.412719	ENSG00000187867.8	FALSE	ENSG00000187867	19	PALM3	protein_coding	2262	paralemmin 3 [Source:HGNC Symbol;Acc:HGNC:33274]	342979	A6NDB9	A6NDB9
-0.121019	5.7599	-2.18128	0.0412985	0.412719	ENSG00000175198.16	FALSE	ENSG00000175198	13	PCCA	protein_coding	2494	propionyl-CoA carboxylase subunit alpha [Source:HGNC Symbol;Acc:HGNC:8653]	5095	P05165	P05165
-0.143795	8.0278	-2.181	0.0413227	0.412719	ENSG00000111371.15	FALSE	ENSG00000111371	12	SLC38A1	protein_coding	8066	solute carrier family 38 member 1 [Source:HGNC Symbol;Acc:HGNC:13447]	81539	A0A024R124	A0A024R124
-0.14411	6.56579	-2.18048	0.0413656	0.412719	ENSG00000134186.11	FALSE	ENSG00000134186	1	PRPF38B	protein_coding	3728	pre-mRNA processing factor 38B [Source:HGNC Symbol;Acc:HGNC:25512]	55119	Q5VTL8	Q5VTL8
0.156673	5.11534	2.18045	0.0413681	0.412719	ENSG00000105486.13	FALSE	ENSG00000105486	19	LIG1	protein_coding	4102	DNA ligase 1 [Source:HGNC Symbol;Acc:HGNC:6598]	3978	P18858	P18858
-0.196144	7.59985	-2.1804	0.041373	0.412719	ENSG00000167004.12	FALSE	ENSG00000167004	15	PDIA3	protein_coding	3727	protein disulfide isomerase family A member 3 [Source:HGNC Symbol;Acc:HGNC:4606]	2923	P30101	P30101
0.16526	6.05759	2.1799	0.0414149	0.412753	ENSG00000169967.16	FALSE	ENSG00000169967	2	MAP3K2	protein_coding	10992	mitogen-activated protein kinase kinase kinase 2 [Source:HGNC Symbol;Acc:HGNC:6854]	10746	A0A024RAH0	A0A024RAH0
0.716946	0.0988833	2.1796	0.0414395	0.412753	ENSG00000284946.1	FALSE	ENSG00000284946	15	AC068831.7	protein_coding	6683	novel transcript	#N/A	#N/A	#N/A
0.244941	3.38765	2.17902	0.0414888	0.412902	ENSG00000198546.14	FALSE	ENSG00000198546	10	ZNF511	protein_coding	2004	zinc finger protein 511 [Source:HGNC Symbol;Acc:HGNC:28445]	118472	Q8NB15	Q8NB15
0.160801	5.13275	2.17858	0.0415255	0.412902	ENSG00000165476.13	FALSE	ENSG00000165476	10	REEP3	protein_coding	5205	receptor accessory protein 3 [Source:HGNC Symbol;Acc:HGNC:23711]	221035	Q6NUK4	Q6NUK4
0.168266	5.11349	2.1783	0.0415493	0.412902	ENSG00000183762.12	FALSE	ENSG00000183762	22	KREMEN1	protein_coding	6138	kringle containing transmembrane protein 1 [Source:HGNC Symbol;Acc:HGNC:17550]	83999	Q96MU8	Q96MU8
-0.402344	0.771766	-2.1769	0.0416671	0.413484	ENSG00000284753.1	FALSE	ENSG00000284753	3	EEF1AKMT4	protein_coding	1823	EEF1A lysine methyltransferase 4 [Source:HGNC Symbol;Acc:HGNC:53611]	110599564	#N/A	#N/A
0.115284	4.802	2.17655	0.0416969	0.413484	ENSG00000067177.14	FALSE	ENSG00000067177	X	PHKA1	protein_coding	6173	phosphorylase kinase regulatory subunit alpha 1 [Source:HGNC Symbol;Acc:HGNC:8925]	5255	P46020	P46020
-0.411216	1.99212	-2.17648	0.0417027	0.413484	ENSG00000119574.12	FALSE	ENSG00000119574	19	ZBTB45	protein_coding	2541	zinc finger and BTB domain containing 45 [Source:HGNC Symbol;Acc:HGNC:23715]	84878	A0A024R4T8	A0A024R4T8
0.156929	4.65348	2.17531	0.0418023	0.414157	ENSG00000198089.15	FALSE	ENSG00000198089	22	SFI1	protein_coding	5250	SFI1 centrin binding protein [Source:HGNC Symbol;Acc:HGNC:29064]	9814	A8K8P3	A8K8P3
-0.125015	5.48029	-2.17372	0.0419372	0.414728	ENSG00000167671.11	FALSE	ENSG00000167671	19	UBXN6	protein_coding	4598	UBX domain protein 6 [Source:HGNC Symbol;Acc:HGNC:14928]	80700	Q9BZV1	Q9BZV1
-0.233505	4.41114	-2.17331	0.0419722	0.414728	ENSG00000106605.10	FALSE	ENSG00000106605	7	BLVRA	protein_coding	1161	biliverdin reductase A [Source:HGNC Symbol;Acc:HGNC:1062]	644	A0A140VJF4	A0A140VJF4
0.229019	3.43535	2.17323	0.0419791	0.414728	ENSG00000153044.9	FALSE	ENSG00000153044	5	CENPH	protein_coding	1389	centromere protein H [Source:HGNC Symbol;Acc:HGNC:17268]	64946	A0A0S2Z5T0	A0A0S2Z5T0
-0.292056	2.68182	-2.17313	0.0419869	0.414728	ENSG00000244165.1	FALSE	ENSG00000244165	19	P2RY11	protein_coding	1943	purinergic receptor P2Y11 [Source:HGNC Symbol;Acc:HGNC:8540]	5032	Q96G91	Q96G91
0.164789	5.48698	2.17134	0.0421396	0.415921	ENSG00000168300.13	FALSE	ENSG00000168300	8	PCMTD1	protein_coding	4252	protein-L-isoaspartate _D-aspartate_ O-methyltransferase domain containing 1 [Source:HGNC Symbol;Acc:HGNC:30483]	115294	F5H1M8	F5H1M8
0.158823	5.77887	2.1696	0.0422883	0.41681	ENSG00000198707.14	FALSE	ENSG00000198707	12	CEP290	protein_coding	7948	centrosomal protein 290 [Source:HGNC Symbol;Acc:HGNC:29021]	80184	O15078	O15078
0.183063	7.76441	2.16914	0.0423282	0.41681	ENSG00000144674.16	FALSE	ENSG00000144674	3	GOLGA4	protein_coding	7772	golgin A4 [Source:HGNC Symbol;Acc:HGNC:4427]	2803	Q13439	Q13439
-0.13922	5.5369	-2.16883	0.0423546	0.41681	ENSG00000081791.8	FALSE	ENSG00000081791	5	DELE1	protein_coding	4970	DAP3 binding cell death enhancer 1 [Source:HGNC Symbol;Acc:HGNC:28969]	9812	Q14154	Q14154
0.137896	7.08938	2.1688	0.0423572	0.41681	ENSG00000101596.15	FALSE	ENSG00000101596	18	SMCHD1	protein_coding	8821	structural maintenance of chromosomes flexible hinge domain containing 1 [Source:HGNC Symbol;Acc:HGNC:29090]	23347	A6NHR9	A6NHR9
-0.274981	-0.021845	-2.16757	0.0424631	0.417335	ENSG00000089472.16	FALSE	ENSG00000089472	X	HEPH	protein_coding	6013	hephaestin [Source:HGNC Symbol;Acc:HGNC:4866]	9843	A0A0C4DG76	A0A0C4DG76
-0.235298	3.34022	-2.16687	0.0425233	0.417335	ENSG00000137880.5	FALSE	ENSG00000137880	15	GCHFR	protein_coding	785	GTP cyclohydrolase I feedback regulator [Source:HGNC Symbol;Acc:HGNC:4194]	2644	P30047	P30047
-0.295923	2.62537	-2.16681	0.0425279	0.417335	ENSG00000073464.11	FALSE	ENSG00000073464	X	CLCN4	protein_coding	6750	chloride voltage-gated channel 4 [Source:HGNC Symbol;Acc:HGNC:2022]	1183	P51793	P51793
0.214271	3.51704	2.16597	0.0426011	0.417335	ENSG00000085433.15	FALSE	ENSG00000085433	1	WDR47	protein_coding	4240	WD repeat domain 47 [Source:HGNC Symbol;Acc:HGNC:29141]	22911	O94967	O94967
-0.116299	6.57159	-2.16597	0.0426011	0.417335	ENSG00000157557.11	FALSE	ENSG00000157557	21	ETS2	protein_coding	3936	ETS proto-oncogene 2, transcription factor [Source:HGNC Symbol;Acc:HGNC:3489]	2114	P15036	P15036
0.17018	5.04877	2.16573	0.0426217	0.417335	ENSG00000128016.5	FALSE	ENSG00000128016	19	ZFP36	protein_coding	1786	ZFP36 ring finger protein [Source:HGNC Symbol;Acc:HGNC:12862]	7538	M0QY76	M0QY76
0.141314	7.08706	2.16558	0.0426341	0.417335	ENSG00000080345.17	FALSE	ENSG00000080345	2	RIF1	protein_coding	15003	replication timing regulatory factor 1 [Source:HGNC Symbol;Acc:HGNC:23207]	55183	Q5UIP0	Q5UIP0
-0.127089	5.58343	-2.16476	0.0427052	0.417719	ENSG00000116030.16	FALSE	ENSG00000116030	2	SUMO1	protein_coding	1536	small ubiquitin-like modifier 1 [Source:HGNC Symbol;Acc:HGNC:12502]	7341	A0A024R3Z2	A0A024R3Z2
-0.176947	4.26199	-2.16299	0.0428586	0.418588	ENSG00000042493.15	FALSE	ENSG00000042493	2	CAPG	protein_coding	1442	capping actin protein, gelsolin like [Source:HGNC Symbol;Acc:HGNC:1474]	822	B2R9S4	B2R9S4
-0.177552	7.16656	-2.16279	0.0428759	0.418588	ENSG00000004487.16	FALSE	ENSG00000004487	1	KDM1A	protein_coding	3059	lysine demethylase 1A [Source:HGNC Symbol;Acc:HGNC:29079]	23028	O60341	O60341
-0.200514	4.7526	-2.16254	0.0428978	0.418588	ENSG00000115884.10	FALSE	ENSG00000115884	2	SDC1	protein_coding	3291	syndecan 1 [Source:HGNC Symbol;Acc:HGNC:10658]	6382	P18827	P18827
-0.194983	6.56286	-2.16192	0.0429511	0.418588	ENSG00000100241.20	FALSE	ENSG00000100241	22	SBF1	protein_coding	8008	SET binding factor 1 [Source:HGNC Symbol;Acc:HGNC:10542]	6305	A0A024R4Z9	A0A024R4Z9
-0.22515	3.43869	-2.16171	0.0429692	0.418588	ENSG00000123815.11	FALSE	ENSG00000123815	19	COQ8B	protein_coding	2443	coenzyme Q8B [Source:HGNC Symbol;Acc:HGNC:19041]	79934	A0A024R0Q9	A0A024R0Q9
0.119781	5.6959	2.16152	0.0429863	0.418588	ENSG00000003056.7	FALSE	ENSG00000003056	12	M6PR	protein_coding	2756	mannose-6-phosphate receptor, cation dependent [Source:HGNC Symbol;Acc:HGNC:6752]	4074	F5GX30	F5GX30
-0.115427	6.86005	-2.15935	0.0431748	0.419561	ENSG00000087269.15	FALSE	ENSG00000087269	4	NOP14	protein_coding	3538	NOP14 nucleolar protein [Source:HGNC Symbol;Acc:HGNC:16821]	8602	A8KA74	A8KA74
-0.210224	4.15625	-2.15927	0.0431819	0.419561	ENSG00000102390.10	FALSE	ENSG00000102390	X	PBDC1	protein_coding	1201	polysaccharide biosynthesis domain containing 1 [Source:HGNC Symbol;Acc:HGNC:28790]	51260	A6NDF3	A6NDF3
-0.235255	3.60617	-2.15926	0.0431825	0.419561	ENSG00000101997.12	FALSE	ENSG00000101997	X	CCDC22	protein_coding	2319	coiled-coil domain containing 22 [Source:HGNC Symbol;Acc:HGNC:28909]	28952	A0A024QZ03	A0A024QZ03
0.444212	0.513213	2.15833	0.0432646	0.419912	ENSG00000159761.14	FALSE	ENSG00000159761	16	C16ORF86	protein_coding	1719	chromosome 16 open reading frame 86 [Source:HGNC Symbol;Acc:HGNC:33755]	388284	Q6ZW13	Q6ZW13
-0.28557	3.89416	-2.15811	0.043283	0.419912	ENSG00000160180.15	FALSE	ENSG00000160180	21	TFF3	protein_coding	1109	trefoil factor 3 [Source:HGNC Symbol;Acc:HGNC:11757]	7033	A0A0A6YYJ4	A0A0A6YYJ4
-0.170513	5.30514	-2.15541	0.0435199	0.42122	ENSG00000185222.9	FALSE	ENSG00000185222	X	TCEAL9	protein_coding	1938	transcription elongation factor A like 9 [Source:HGNC Symbol;Acc:HGNC:30084]	51186	Q9UHQ7	Q9UHQ7
0.194174	5.79857	2.15511	0.0435468	0.42122	ENSG00000131507.10	FALSE	ENSG00000131507	5	NDFIP1	protein_coding	4164	Nedd4 family interacting protein 1 [Source:HGNC Symbol;Acc:HGNC:17592]	80762	Q9BT67	Q9BT67
0.179027	4.27326	2.15494	0.0435619	0.42122	ENSG00000197056.10	FALSE	ENSG00000197056	1	ZMYM1	protein_coding	4608	zinc finger MYM-type containing 1 [Source:HGNC Symbol;Acc:HGNC:26253]	79830	A0A1B0GXA6	A0A1B0GXA6
0.157741	6.52157	2.15475	0.0435784	0.42122	ENSG00000100815.12	FALSE	ENSG00000100815	14	TRIP11	protein_coding	9996	thyroid hormone receptor interactor 11 [Source:HGNC Symbol;Acc:HGNC:12305]	9321	Q15643	Q15643
-0.157158	3.8964	-2.15435	0.0436136	0.42122	ENSG00000119718.10	FALSE	ENSG00000119718	14	EIF2B2	protein_coding	4314	eukaryotic translation initiation factor 2B subunit beta [Source:HGNC Symbol;Acc:HGNC:3258]	8892	P49770	P49770
-0.142759	4.85296	-2.15427	0.0436206	0.42122	ENSG00000138442.9	FALSE	ENSG00000138442	2	WDR12	protein_coding	8100	WD repeat domain 12 [Source:HGNC Symbol;Acc:HGNC:14098]	55759	Q53T99	Q53T99
-0.435459	-0.765268	-2.15401	0.0436434	0.42122	ENSG00000116711.9	FALSE	ENSG00000116711	1	PLA2G4A	protein_coding	2875	phospholipase A2 group IVA [Source:HGNC Symbol;Acc:HGNC:9035]	5321	B4DZI4	B4DZI4
-0.191311	4.11031	-2.15318	0.0437164	0.421613	ENSG00000157778.8	FALSE	ENSG00000157778	7	PSMG3	protein_coding	1391	proteasome assembly chaperone 3 [Source:HGNC Symbol;Acc:HGNC:22420]	84262	A0A024R806	A0A024R806
0.3603	2.90869	2.1523	0.0437942	0.422052	ENSG00000149548.14	FALSE	ENSG00000149548	11	CCDC15	protein_coding	3924	coiled-coil domain containing 15 [Source:HGNC Symbol;Acc:HGNC:25798]	80071	Q0P6D6	Q0P6D6
0.160805	4.66603	2.1517	0.0438475	0.422233	ENSG00000123607.14	FALSE	ENSG00000123607	2	TTC21B	protein_coding	5482	tetratricopeptide repeat domain 21B [Source:HGNC Symbol;Acc:HGNC:25660]	79809	A8KA77	A8KA77
-0.129855	5.62891	-2.15136	0.0438776	0.422233	ENSG00000156011.16	FALSE	ENSG00000156011	8	PSD3	protein_coding	11690	pleckstrin and Sec7 domain containing 3 [Source:HGNC Symbol;Acc:HGNC:19093]	23362	B3KRC4	B3KRC4
0.14338	4.92051	2.15091	0.0439173	0.422304	ENSG00000101544.8	FALSE	ENSG00000101544	18	ADNP2	protein_coding	5393	ADNP homeobox 2 [Source:HGNC Symbol;Acc:HGNC:23803]	22850	A0A024R377	A0A024R377
-0.202604	3.40616	-2.14928	0.0440626	0.423112	ENSG00000130304.16	FALSE	ENSG00000130304	19	SLC27A1	protein_coding	4343	solute carrier family 27 member 1 [Source:HGNC Symbol;Acc:HGNC:10995]	376497	Q6PCB7	Q6PCB7
-0.27359	3.83229	-2.14924	0.0440661	0.423112	ENSG00000133067.17	FALSE	ENSG00000133067	1	LGR6	protein_coding	3567	leucine rich repeat containing G protein-coupled receptor 6 [Source:HGNC Symbol;Acc:HGNC:19719]	59352	Q9HBX8	Q9HBX8
0.66933	0.184397	2.14838	0.044142	0.42353	ENSG00000060140.8	FALSE	ENSG00000060140	12	STYK1	protein_coding	2995	serine/threonine/tyrosine kinase 1 [Source:HGNC Symbol;Acc:HGNC:18889]	55359	Q6J9G0	Q6J9G0
-0.154563	5.26644	-2.14617	0.04434	0.424821	ENSG00000105698.15	FALSE	ENSG00000105698	19	USF2	protein_coding	2742	upstream transcription factor 2, c-fos interacting [Source:HGNC Symbol;Acc:HGNC:12594]	7392	Q15853	Q15853
-0.320732	3.08028	-2.14597	0.0443578	0.424821	ENSG00000196747.4	FALSE	ENSG00000196747	6	HIST1H2AI	protein_coding	503	histone cluster 1 H2A family member i [Source:HGNC Symbol;Acc:HGNC:4725]	8329	A4FTV9	A4FTV9
0.17218	4.16558	2.14578	0.0443741	0.424821	ENSG00000162924.14	FALSE	ENSG00000162924	2	REL	protein_coding	11255	REL proto-oncogene, NF-kB subunit [Source:HGNC Symbol;Acc:HGNC:9954]	5966	Q04864	Q04864
-0.125999	4.97522	-2.14515	0.0444309	0.425053	ENSG00000244509.3	FALSE	ENSG00000244509	22	APOBEC3C	protein_coding	2818	apolipoprotein B mRNA editing enzyme catalytic subunit 3C [Source:HGNC Symbol;Acc:HGNC:17353]	27350	Q9NRW3	Q9NRW3
-0.399476	0.671736	-2.14463	0.0444771	0.425185	ENSG00000275410.4	FALSE	ENSG00000275410	17	HNF1B	protein_coding	3481	HNF1 homeobox B [Source:HGNC Symbol;Acc:HGNC:11630]	6928	P35680	P35680
0.261148	3.02159	2.14359	0.0445707	0.425369	ENSG00000177946.6	FALSE	ENSG00000177946	16	CENPBD1	protein_coding	3060	CENPB DNA-binding domain containing 1 [Source:HGNC Symbol;Acc:HGNC:28272]	92806	B2RD01	B2RD01
-0.42671	1.47119	-2.14357	0.0445729	0.425369	ENSG00000177854.7	FALSE	ENSG00000177854	X	TMEM187	protein_coding	1880	transmembrane protein 187 [Source:HGNC Symbol;Acc:HGNC:13705]	8269	Q14656	Q14656
0.170488	3.93646	2.14323	0.0446036	0.425369	ENSG00000128335.13	FALSE	ENSG00000128335	22	APOL2	protein_coding	2685	apolipoprotein L2 [Source:HGNC Symbol;Acc:HGNC:619]	23780	A0A024R1M8	A0A024R1M8
0.162677	4.01998	2.14297	0.0446266	0.425369	ENSG00000111785.19	FALSE	ENSG00000111785	12	RIC8B	protein_coding	5135	RIC8 guanine nucleotide exchange factor B [Source:HGNC Symbol;Acc:HGNC:25555]	55188	B7WPL0	B7WPL0
-0.136666	7.14098	-2.14143	0.0447653	0.426306	ENSG00000105401.8	FALSE	ENSG00000105401	19	CDC37	protein_coding	1608	cell division cycle 37 [Source:HGNC Symbol;Acc:HGNC:1735]	11140	A0A024R7B7	A0A024R7B7
-0.30269	0.12816	-2.14089	0.044814	0.426306	ENSG00000152766.5	FALSE	ENSG00000152766	10	ANKRD22	protein_coding	1596	ankyrin repeat domain 22 [Source:HGNC Symbol;Acc:HGNC:28321]	118932	Q5VYY1	Q5VYY1
0.150841	4.56908	2.14079	0.0448228	0.426306	ENSG00000151806.13	FALSE	ENSG00000151806	4	GUF1	protein_coding	4449	GUF1 homolog, GTPase [Source:HGNC Symbol;Acc:HGNC:25799]	60558	A0A024R9T3	A0A024R9T3
0.241691	3.77341	2.13974	0.0449184	0.426826	ENSG00000165861.13	FALSE	ENSG00000165861	14	ZFYVE1	protein_coding	4485	zinc finger FYVE-type containing 1 [Source:HGNC Symbol;Acc:HGNC:13180]	53349	Q9HBF4	Q9HBF4
-0.184984	3.8918	-2.13947	0.0449428	0.426826	ENSG00000071051.13	FALSE	ENSG00000071051	2	NCK2	protein_coding	2683	NCK adaptor protein 2 [Source:HGNC Symbol;Acc:HGNC:7665]	8440	A0A0S2Z4M6	A0A0S2Z4M6
0.568282	0.086492	2.13851	0.0450296	0.427061	ENSG00000110427.15	FALSE	ENSG00000110427	11	KIAA1549L	protein_coding	11678	KIAA1549 like [Source:HGNC Symbol;Acc:HGNC:24836]	25758	Q12914	Q12914
-0.110372	5.76286	-2.13829	0.0450492	0.427061	ENSG00000023191.16	FALSE	ENSG00000023191	11	RNH1	protein_coding	3281	ribonuclease/angiogenin inhibitor 1 [Source:HGNC Symbol;Acc:HGNC:10074]	6050	A0A140VJT8	A0A140VJT8
0.288086	2.08408	2.13807	0.0450696	0.427061	ENSG00000170873.18	FALSE	ENSG00000170873	8	MTSS1	protein_coding	4944	MTSS1, I-BAR domain containing [Source:HGNC Symbol;Acc:HGNC:20443]	9788	O43312	O43312
-0.259082	2.65094	-2.13775	0.0450983	0.427061	ENSG00000244187.7	FALSE	ENSG00000244187	9	TMEM141	protein_coding	839	transmembrane protein 141 [Source:HGNC Symbol;Acc:HGNC:28211]	85014	Q96I45	Q96I45
0.248252	3.14258	2.13717	0.0451516	0.427256	ENSG00000107099.15	FALSE	ENSG00000107099	9	DOCK8	protein_coding	9277	dedicator of cytokinesis 8 [Source:HGNC Symbol;Acc:HGNC:19191]	81704	Q8NF50	Q8NF50
-0.229484	3.80856	-2.13639	0.0452225	0.427618	ENSG00000090924.14	FALSE	ENSG00000090924	19	PLEKHG2	protein_coding	8132	pleckstrin homology and RhoGEF domain containing G2 [Source:HGNC Symbol;Acc:HGNC:29515]	64857	Q9H7P9	Q9H7P9
0.181878	3.57544	2.13467	0.0453788	0.428501	ENSG00000144802.11	FALSE	ENSG00000144802	3	NFKBIZ	protein_coding	3923	NFKB inhibitor zeta [Source:HGNC Symbol;Acc:HGNC:29805]	64332	Q9BYH8	Q9BYH8
0.155385	4.25972	2.13464	0.0453815	0.428501	ENSG00000180304.14	FALSE	ENSG00000180304	15	OAZ2	protein_coding	7102	ornithine decarboxylase antizyme 2 [Source:HGNC Symbol;Acc:HGNC:8096]	4947	O95190	O95190
-0.704717	-1.34162	-2.1333	0.0455039	0.428599	ENSG00000105672.14	FALSE	ENSG00000105672	19	ETV2	protein_coding	1571	ETS variant 2 [Source:HGNC Symbol;Acc:HGNC:3491]	2116	K7ERX2	K7ERX2
0.244862	4.22677	2.13293	0.0455379	0.428599	ENSG00000139350.11	FALSE	ENSG00000139350	12	NEDD1	protein_coding	4046	neural precursor cell expressed, developmentally down-regulated 1 [Source:HGNC Symbol;Acc:HGNC:7723]	121441	A8K1Z3	A8K1Z3
-0.256032	3.57071	-2.13276	0.0455539	0.428599	ENSG00000196476.11	FALSE	ENSG00000196476	20	C20ORF96	protein_coding	1608	chromosome 20 open reading frame 96 [Source:HGNC Symbol;Acc:HGNC:16227]	140680	B7ZML9	B7ZML9
-0.173224	4.64894	-2.13242	0.0455847	0.428599	ENSG00000171163.15	FALSE	ENSG00000171163	1	ZNF692	protein_coding	2704	zinc finger protein 692 [Source:HGNC Symbol;Acc:HGNC:26049]	55657	Q9BU19	Q9BU19
0.344453	2.33034	2.13217	0.0456077	0.428599	ENSG00000112559.13	FALSE	ENSG00000112559	6	MDFI	protein_coding	1629	MyoD family inhibitor [Source:HGNC Symbol;Acc:HGNC:6967]	4188	A0A024RCY2	A0A024RCY2
-0.362687	1.85622	-2.13206	0.0456179	0.428599	ENSG00000141540.10	FALSE	ENSG00000141540	17	TTYH2	protein_coding	3661	tweety family member 2 [Source:HGNC Symbol;Acc:HGNC:13877]	94015	B4DKD1	B4DKD1
-0.112198	6.09555	-2.13202	0.0456215	0.428599	ENSG00000152492.14	FALSE	ENSG00000152492	3	CCDC50	protein_coding	8957	coiled-coil domain containing 50 [Source:HGNC Symbol;Acc:HGNC:18111]	152137	Q8IVM0	Q8IVM0
0.137161	5.35822	2.13161	0.0456594	0.428647	ENSG00000143337.18	FALSE	ENSG00000143337	1	TOR1AIP1	protein_coding	8704	torsin 1A interacting protein 1 [Source:HGNC Symbol;Acc:HGNC:29456]	26092	Q5JTV8	Q5JTV8
0.168643	4.80113	2.13019	0.0457902	0.429337	ENSG00000130684.13	FALSE	ENSG00000130684	20	ZNF337	protein_coding	3613	zinc finger protein 337 [Source:HGNC Symbol;Acc:HGNC:15809]	26152	Q6ZUQ0	Q6ZUQ0
0.170057	2.9271	2.12983	0.0458228	0.429337	ENSG00000196782.12	FALSE	ENSG00000196782	4	MAML3	protein_coding	6844	mastermind like transcriptional coactivator 3 [Source:HGNC Symbol;Acc:HGNC:16272]	55534	Q96JK9	Q96JK9
-0.723736	-0.139844	-2.12968	0.0458371	0.429337	ENSG00000249961.9	FALSE	ENSG00000249961	16	TERB1	protein_coding	2541	telomere repeat binding bouquet formation protein 1 [Source:HGNC Symbol;Acc:HGNC:26675]	283847	Q8NA31	Q8NA31
0.462623	2.5858	2.12938	0.0458643	0.429337	ENSG00000124313.14	FALSE	ENSG00000124313	X	IQSEC2	protein_coding	6037	IQ motif and Sec7 domain 2 [Source:HGNC Symbol;Acc:HGNC:29059]	23096	Q5JU85	Q5JU85
-0.197198	4.22175	-2.12819	0.0459743	0.429967	ENSG00000181830.8	FALSE	ENSG00000181830	11	SLC35C1	protein_coding	4171	solute carrier family 35 member C1 [Source:HGNC Symbol;Acc:HGNC:20197]	55343	Q96A29	Q96A29
0.29374	4.77309	2.12794	0.0459973	0.429967	ENSG00000114315.3	FALSE	ENSG00000114315	3	HES1	protein_coding	1578	hes family bHLH transcription factor 1 [Source:HGNC Symbol;Acc:HGNC:5192]	3280	Q14469	Q14469
0.11747	7.22472	2.12726	0.0460603	0.430248	ENSG00000196712.17	FALSE	ENSG00000196712	17	NF1	protein_coding	12425	neurofibromin 1 [Source:HGNC Symbol;Acc:HGNC:7765]	4763	P21359	P21359
-0.471228	1.07127	-2.1266	0.046121	0.430507	ENSG00000278637.1	FALSE	ENSG00000278637	6	HIST1H4A	protein_coding	312	histone cluster 1 H4 family member a [Source:HGNC Symbol;Acc:HGNC:4781]	8359	B2R4R0	B2R4R0
0.120624	6.94101	2.12549	0.0462241	0.431103	ENSG00000010244.18	FALSE	ENSG00000010244	17	ZNF207	protein_coding	13781	zinc finger protein 207 [Source:HGNC Symbol;Acc:HGNC:12998]	7756	O43670	O43670
0.16839	4.60434	2.12502	0.0462683	0.431103	ENSG00000183718.5	FALSE	ENSG00000183718	5	TRIM52	protein_coding	4753	tripartite motif containing 52 [Source:HGNC Symbol;Acc:HGNC:19024]	84851	L0CQ38	L0CQ38
-0.446666	-0.234009	-2.12476	0.0462919	0.431103	ENSG00000259316.11	FALSE	ENSG00000259316	15	AC087632.1	protein_coding	1973	novel transcript	#N/A	#N/A	#N/A
-0.14938	4.23393	-2.12449	0.0463169	0.431103	ENSG00000172732.11	FALSE	ENSG00000172732	11	MUS81	protein_coding	3420	MUS81 structure-specific endonuclease subunit [Source:HGNC Symbol;Acc:HGNC:29814]	80198	Q53ES5	Q53ES5
0.115689	5.33495	2.12353	0.0464064	0.431483	ENSG00000198663.16	FALSE	ENSG00000198663	6	C6ORF89	protein_coding	6861	chromosome 6 open reading frame 89 [Source:HGNC Symbol;Acc:HGNC:21114]	221477	A0A024RCY0	A0A024RCY0
0.145884	6.25332	2.12335	0.0464237	0.431483	ENSG00000163681.14	FALSE	ENSG00000163681	3	SLMAP	protein_coding	6749	sarcolemma associated protein [Source:HGNC Symbol;Acc:HGNC:16643]	7871	Q14BN4	Q14BN4
-0.406921	-1.55515	-2.12275	0.0464796	0.431695	ENSG00000019549.11	FALSE	ENSG00000019549	8	SNAI2	protein_coding	2828	snail family transcriptional repressor 2 [Source:HGNC Symbol;Acc:HGNC:11094]	6591	O43623	O43623
0.302443	3.0403	2.12098	0.0466447	0.432921	ENSG00000118194.18	FALSE	ENSG00000118194	1	TNNT2	protein_coding	3014	troponin T2, cardiac type [Source:HGNC Symbol;Acc:HGNC:11949]	7139	P45379	P45379
-0.192002	3.3791	-2.11999	0.0467378	0.433394	ENSG00000198093.10	FALSE	ENSG00000198093	19	ZNF649	protein_coding	3197	zinc finger protein 649 [Source:HGNC Symbol;Acc:HGNC:25741]	65251	Q9BS31	Q9BS31
0.150326	3.5788	2.11973	0.0467619	0.433394	ENSG00000168228.14	FALSE	ENSG00000168228	4	ZCCHC4	protein_coding	2785	zinc finger CCHC-type containing 4 [Source:HGNC Symbol;Acc:HGNC:22917]	29063	Q9H5U6	Q9H5U6
-0.203843	4.86159	-2.11852	0.0468757	0.43396	ENSG00000151150.21	FALSE	ENSG00000151150	10	ANK3	protein_coding	16874	ankyrin 3 [Source:HGNC Symbol;Acc:HGNC:494]	288	Q12955	Q12955
-0.145495	5.14938	-2.11811	0.0469143	0.43396	ENSG00000073060.15	FALSE	ENSG00000073060	12	SCARB1	protein_coding	5527	scavenger receptor class B member 1 [Source:HGNC Symbol;Acc:HGNC:1664]	949	Q8WTV0	Q8WTV0
-0.209334	4.71708	-2.11802	0.0469227	0.43396	ENSG00000115902.10	FALSE	ENSG00000115902	2	SLC1A4	protein_coding	5789	solute carrier family 1 member 4 [Source:HGNC Symbol;Acc:HGNC:10942]	6509	P43007	P43007
0.138573	6.09946	2.11726	0.0469948	0.433979	ENSG00000132670.20	FALSE	ENSG00000132670	20	PTPRA	protein_coding	3725	protein tyrosine phosphatase, receptor type A [Source:HGNC Symbol;Acc:HGNC:9664]	5786	P18433	P18433
-0.682305	-0.51864	-2.11694	0.0470245	0.433979	ENSG00000136250.11	FALSE	ENSG00000136250	7	AOAH	protein_coding	2398	acyloxyacyl hydrolase [Source:HGNC Symbol;Acc:HGNC:548]	313	A0A087WVT3	A0A087WVT3
-0.517009	-2.04192	-2.11676	0.0470417	0.433979	ENSG00000167617.2	FALSE	ENSG00000167617	19	CDC42EP5	protein_coding	864	CDC42 effector protein 5 [Source:HGNC Symbol;Acc:HGNC:17408]	148170	Q6NZY7	Q6NZY7
0.13722	3.75674	2.1158	0.0471321	0.433979	ENSG00000128513.14	FALSE	ENSG00000128513	7	POT1	protein_coding	4080	protection of telomeres 1 [Source:HGNC Symbol;Acc:HGNC:17284]	25913	A8MTK3	A8MTK3
0.640097	0.263839	2.11563	0.0471487	0.433979	ENSG00000138061.11	FALSE	ENSG00000138061	2	CYP1B1	protein_coding	5250	cytochrome P450 family 1 subfamily B member 1 [Source:HGNC Symbol;Acc:HGNC:2597]	1545	Q16678	Q16678
-0.257452	3.20506	-2.11558	0.0471533	0.433979	ENSG00000157870.15	FALSE	ENSG00000157870	1	PRXL2B	protein_coding	2827	peroxiredoxin like 2B [Source:HGNC Symbol;Acc:HGNC:28390]	127281	A0A0A0MT35	A0A0A0MT35
0.188326	2.71907	2.11554	0.0471572	0.433979	ENSG00000134461.15	FALSE	ENSG00000134461	10	ANKRD16	protein_coding	2738	ankyrin repeat domain 16 [Source:HGNC Symbol;Acc:HGNC:23471]	54522	Q6P6B7	Q6P6B7
0.143105	5.26608	2.11459	0.0472468	0.434497	ENSG00000176102.12	FALSE	ENSG00000176102	11	CSTF3	protein_coding	2911	cleavage stimulation factor subunit 3 [Source:HGNC Symbol;Acc:HGNC:2485]	1479	Q12996	Q12996
-0.120061	6.44051	-2.11405	0.0472977	0.43466	ENSG00000133142.17	FALSE	ENSG00000133142	X	TCEAL4	protein_coding	1571	transcription elongation factor A like 4 [Source:HGNC Symbol;Acc:HGNC:26121]	79921	Q96EI5	Q96EI5
0.189442	6.19255	2.1127	0.0474262	0.434761	ENSG00000159593.14	FALSE	ENSG00000159593	16	NAE1	protein_coding	1909	NEDD8 activating enzyme E1 subunit 1 [Source:HGNC Symbol;Acc:HGNC:621]	8883	Q13564	Q13564
0.597452	0.881874	2.11262	0.0474334	0.434761	ENSG00000196684.12	FALSE	ENSG00000196684	19	HSH2D	protein_coding	2473	hematopoietic SH2 domain containing [Source:HGNC Symbol;Acc:HGNC:24920]	84941	Q96JZ2	Q96JZ2
0.194485	3.20191	2.11261	0.047435	0.434761	ENSG00000158480.10	FALSE	ENSG00000158480	20	SPATA2	protein_coding	4138	spermatogenesis associated 2 [Source:HGNC Symbol;Acc:HGNC:14681]	9825	A8K0S9	A8K0S9
-0.104551	6.40819	-2.11224	0.04747	0.434761	ENSG00000150403.17	FALSE	ENSG00000150403	13	TMCO3	protein_coding	3542	transmembrane and coiled-coil domains 3 [Source:HGNC Symbol;Acc:HGNC:20329]	55002	A0A024RE09	A0A024RE09
0.192464	4.38342	2.11215	0.0474786	0.434761	ENSG00000153975.9	FALSE	ENSG00000153975	6	ZUP1	protein_coding	2195	zinc finger containing ubiquitin peptidase 1 [Source:HGNC Symbol;Acc:HGNC:21224]	221302	A0A0S2Z644	A0A0S2Z644
0.133494	5.63023	2.11101	0.0475866	0.434761	ENSG00000183779.6	FALSE	ENSG00000183779	8	ZNF703	protein_coding	3349	zinc finger protein 703 [Source:HGNC Symbol;Acc:HGNC:25883]	80139	Q9H7S9	Q9H7S9
-0.11179	4.67974	-2.11018	0.0476665	0.434761	ENSG00000053372.4	FALSE	ENSG00000053372	1	MRTO4	protein_coding	2315	MRT4 homolog, ribosome maturation factor [Source:HGNC Symbol;Acc:HGNC:18477]	51154	A0A024RAE1	A0A024RAE1
0.18775	3.40385	2.11005	0.0476788	0.434761	ENSG00000154642.10	FALSE	ENSG00000154642	21	C21ORF91	protein_coding	5433	chromosome 21 open reading frame 91 [Source:HGNC Symbol;Acc:HGNC:16459]	54149	Q68DA1	Q68DA1
-0.634436	0.986406	-2.10993	0.0476903	0.434761	ENSG00000104783.12	FALSE	ENSG00000104783	19	KCNN4	protein_coding	2244	potassium calcium-activated channel subfamily N member 4 [Source:HGNC Symbol;Acc:HGNC:6293]	3783	O15554	O15554
0.280746	3.43454	2.1098	0.0477021	0.434761	ENSG00000177981.10	FALSE	ENSG00000177981	12	ASB8	protein_coding	2615	ankyrin repeat and SOCS box containing 8 [Source:HGNC Symbol;Acc:HGNC:17183]	140461	Q9H765	Q9H765
0.194106	4.09513	2.10871	0.0478066	0.434761	ENSG00000189308.10	FALSE	ENSG00000189308	4	LIN54	protein_coding	6127	lin-54 DREAM MuvB core complex component [Source:HGNC Symbol;Acc:HGNC:25397]	132660	Q6MZP7	Q6MZP7
-0.156294	9.95423	-2.10851	0.0478259	0.434761	ENSG00000108298.11	FALSE	ENSG00000108298	17	RPL19	protein_coding	1247	ribosomal protein L19 [Source:HGNC Symbol;Acc:HGNC:10312]	6143	P84098	P84098
0.205716	2.82198	2.10849	0.0478275	0.434761	ENSG00000182010.10	FALSE	ENSG00000182010	10	RTKN2	protein_coding	6641	rhotekin 2 [Source:HGNC Symbol;Acc:HGNC:19364]	219790	Q8IZC4	Q8IZC4
-0.152116	5.66219	-2.10789	0.0478852	0.434761	ENSG00000183207.13	FALSE	ENSG00000183207	19	RUVBL2	protein_coding	2009	RuvB like AAA ATPase 2 [Source:HGNC Symbol;Acc:HGNC:10475]	10856	B3KNL2	B3KNL2
0.149139	7.07449	2.10691	0.0479795	0.434761	ENSG00000104852.14	FALSE	ENSG00000104852	19	SNRNP70	protein_coding	3221	small nuclear ribonucleoprotein U1 subunit 70 [Source:HGNC Symbol;Acc:HGNC:11150]	6625	P08621	P08621
0.12059	7.71169	2.10664	0.0480053	0.434761	ENSG00000124486.12	FALSE	ENSG00000124486	X	USP9X	protein_coding	12401	ubiquitin specific peptidase 9 X-linked [Source:HGNC Symbol;Acc:HGNC:12632]	8239	Q6P468	Q6P468
0.167734	5.49152	2.10604	0.0480631	0.434761	ENSG00000157933.9	FALSE	ENSG00000157933	1	SKI	protein_coding	5613	SKI proto-oncogene [Source:HGNC Symbol;Acc:HGNC:10896]	6497	P12755	P12755
0.573269	-0.350492	2.10583	0.0480832	0.434761	ENSG00000182196.13	FALSE	ENSG00000182196	12	ARL6IP4	protein_coding	1782	ADP ribosylation factor like GTPase 6 interacting protein 4 [Source:HGNC Symbol;Acc:HGNC:18076]	51329	Q66PJ3	Q66PJ3
-0.14048	5.10225	-2.10578	0.0480883	0.434761	ENSG00000105355.8	FALSE	ENSG00000105355	19	PLIN3	protein_coding	2333	perilipin 3 [Source:HGNC Symbol;Acc:HGNC:16893]	10226	A0A140VJN8	A0A140VJN8
0.278004	3.23472	2.10561	0.0481041	0.434761	ENSG00000133739.15	FALSE	ENSG00000133739	8	LRRCC1	protein_coding	4493	leucine rich repeat and coiled-coil centrosomal protein 1 [Source:HGNC Symbol;Acc:HGNC:29373]	85444	B4DTJ0	B4DTJ0
-0.236242	4.05426	-2.10536	0.0481281	0.434761	ENSG00000256269.8	FALSE	ENSG00000256269	11	HMBS	protein_coding	2130	hydroxymethylbilane synthase [Source:HGNC Symbol;Acc:HGNC:4982]	3145	P08397	P08397
-0.12966	4.97738	-2.10519	0.0481447	0.434761	ENSG00000185651.14	FALSE	ENSG00000185651	22	UBE2L3	protein_coding	3451	ubiquitin conjugating enzyme E2 L3 [Source:HGNC Symbol;Acc:HGNC:12488]	7332	P68036	P68036
-0.186762	3.7662	-2.10516	0.0481478	0.434761	ENSG00000109881.16	FALSE	ENSG00000109881	11	CCDC34	protein_coding	2109	coiled-coil domain containing 34 [Source:HGNC Symbol;Acc:HGNC:25079]	91057	Q96HJ3	Q96HJ3
0.30767	3.26525	2.10507	0.0481561	0.434761	ENSG00000055118.14	FALSE	ENSG00000055118	7	KCNH2	protein_coding	4286	potassium voltage-gated channel subfamily H member 2 [Source:HGNC Symbol;Acc:HGNC:6251]	3757	A0A090N8Q0	A0A090N8Q0
-0.509384	0.111744	-2.1048	0.0481826	0.434761	ENSG00000186469.8	FALSE	ENSG00000186469	14	GNG2	protein_coding	3729	G protein subunit gamma 2 [Source:HGNC Symbol;Acc:HGNC:4404]	54331	P59768	P59768
-0.172236	3.60263	-2.1048	0.0481827	0.434761	ENSG00000170502.12	FALSE	ENSG00000170502	4	NUDT9	protein_coding	2458	nudix hydrolase 9 [Source:HGNC Symbol;Acc:HGNC:8056]	53343	Q96KB3	Q96KB3
-0.164634	6.01235	-2.10455	0.048207	0.434761	ENSG00000146376.10	FALSE	ENSG00000146376	6	ARHGAP18	protein_coding	4462	Rho GTPase activating protein 18 [Source:HGNC Symbol;Acc:HGNC:21035]	93663	Q8N392	Q8N392
-0.740618	1.0523	-2.10397	0.0482624	0.434961	ENSG00000206535.7	FALSE	ENSG00000206535	3	LNP1	protein_coding	2210	leukemia NUP98 fusion partner 1 [Source:HGNC Symbol;Acc:HGNC:28014]	348801	A1A4G5	A1A4G5
0.148659	7.90245	2.10211	0.0484425	0.435513	ENSG00000047410.13	FALSE	ENSG00000047410	1	TPR	protein_coding	9708	translocated promoter region, nuclear basket protein [Source:HGNC Symbol;Acc:HGNC:12017]	7175	P12270	P12270
-0.144499	6.70841	-2.10199	0.0484539	0.435513	ENSG00000177156.10	FALSE	ENSG00000177156	11	TALDO1	protein_coding	1346	transaldolase 1 [Source:HGNC Symbol;Acc:HGNC:11559]	6888	A0A140VK56	A0A140VK56
0.119282	5.95243	2.10143	0.0485086	0.435513	ENSG00000125633.10	FALSE	ENSG00000125633	2	CCDC93	protein_coding	6899	coiled-coil domain containing 93 [Source:HGNC Symbol;Acc:HGNC:25611]	54520	Q567U6	Q567U6
0.364506	1.31465	2.10115	0.0485355	0.435513	ENSG00000100092.22	FALSE	ENSG00000100092	22	SH3BP1	protein_coding	2858	SH3 domain binding protein 1 [Source:HGNC Symbol;Acc:HGNC:10824]	23616	Q9Y3L3	Q9Y3L3
-0.15162	5.18939	-2.10072	0.0485775	0.435513	ENSG00000136045.11	FALSE	ENSG00000136045	12	PWP1	protein_coding	2621	PWP1 homolog, endonuclein [Source:HGNC Symbol;Acc:HGNC:17015]	11137	B4DJV5	B4DJV5
0.225005	3.57169	2.10034	0.0486144	0.435513	ENSG00000148688.13	FALSE	ENSG00000148688	10	RPP30	protein_coding	2589	ribonuclease P/MRP subunit p30 [Source:HGNC Symbol;Acc:HGNC:17688]	10556	P78346	P78346
0.156896	5.25419	2.09999	0.0486481	0.435513	ENSG00000124226.10	FALSE	ENSG00000124226	20	RNF114	protein_coding	2503	ring finger protein 114 [Source:HGNC Symbol;Acc:HGNC:13094]	55905	Q9Y508	Q9Y508
-0.569069	-1.55647	-2.09997	0.0486499	0.435513	ENSG00000130487.7	FALSE	ENSG00000130487	22	KLHDC7B	protein_coding	5133	kelch domain containing 7B [Source:HGNC Symbol;Acc:HGNC:25145]	113730	Q96G42	Q96G42
0.223427	4.11334	2.09986	0.0486608	0.435513	ENSG00000121039.9	FALSE	ENSG00000121039	8	RDH10	protein_coding	3949	retinol dehydrogenase 10 [Source:HGNC Symbol;Acc:HGNC:19975]	157506	A0A024R7X6	A0A024R7X6
0.236931	4.28931	2.09908	0.048737	0.435513	ENSG00000059804.15	FALSE	ENSG00000059804	12	SLC2A3	protein_coding	4414	solute carrier family 2 member 3 [Source:HGNC Symbol;Acc:HGNC:11007]	6515	P11169	P11169
-0.124394	7.48932	-2.09851	0.0487926	0.435513	ENSG00000166197.16	FALSE	ENSG00000166197	10	NOLC1	protein_coding	3967	nucleolar and coiled-body phosphoprotein 1 [Source:HGNC Symbol;Acc:HGNC:15608]	9221	B2RAU8	B2RAU8
0.174711	4.61799	2.09763	0.0488786	0.435513	ENSG00000175893.11	FALSE	ENSG00000175893	9	ZDHHC21	protein_coding	9160	zinc finger DHHC-type containing 21 [Source:HGNC Symbol;Acc:HGNC:20750]	340481	Q8IVQ6	Q8IVQ6
0.152097	5.17375	2.09762	0.0488795	0.435513	ENSG00000117625.13	FALSE	ENSG00000117625	1	RCOR3	protein_coding	4246	REST corepressor 3 [Source:HGNC Symbol;Acc:HGNC:25594]	55758	Q9P2K3	Q9P2K3
-0.196242	4.50439	-2.09741	0.0488998	0.435513	ENSG00000163013.11	FALSE	ENSG00000163013	2	FBXO41	protein_coding	7336	F-box protein 41 [Source:HGNC Symbol;Acc:HGNC:29409]	150726	Q8TF61	Q8TF61
0.358863	2.5089	2.09732	0.0489086	0.435513	ENSG00000161888.11	FALSE	ENSG00000161888	19	SPC24	protein_coding	2315	SPC24, NDC80 kinetochore complex component [Source:HGNC Symbol;Acc:HGNC:26913]	147841	Q8NBT2	Q8NBT2
0.595817	0.539548	2.09728	0.0489128	0.435513	ENSG00000100342.20	FALSE	ENSG00000100342	22	APOL1	protein_coding	3000	apolipoprotein L1 [Source:HGNC Symbol;Acc:HGNC:618]	8542	O14791	O14791
-0.170684	5.19957	-2.09656	0.048983	0.435513	ENSG00000125912.10	FALSE	ENSG00000125912	19	NCLN	protein_coding	4005	nicalin [Source:HGNC Symbol;Acc:HGNC:26923]	56926	Q969V3	Q969V3
0.827028	-1.09171	2.09641	0.0489979	0.435513	ENSG00000163794.6	FALSE	ENSG00000163794	2	UCN	protein_coding	795	urocortin [Source:HGNC Symbol;Acc:HGNC:12516]	7349	P55089	P55089
-0.163663	6.3301	-2.09604	0.0490341	0.435513	ENSG00000159166.13	FALSE	ENSG00000159166	1	LAD1	protein_coding	2906	ladinin 1 [Source:HGNC Symbol;Acc:HGNC:6472]	3898	O00515	O00515
0.131245	4.9313	2.09602	0.049036	0.435513	ENSG00000265491.4	FALSE	ENSG00000265491	1	RNF115	protein_coding	9117	ring finger protein 115 [Source:HGNC Symbol;Acc:HGNC:18154]	27246	Q9Y4L5	Q9Y4L5
-0.187453	4.9815	-2.09525	0.0491114	0.435513	ENSG00000126756.11	FALSE	ENSG00000126756	X	UXT	protein_coding	894	ubiquitously expressed prefoldin like chaperone [Source:HGNC Symbol;Acc:HGNC:12641]	8409	Q9UBK9	Q9UBK9
0.401916	0.892358	2.09468	0.049167	0.435513	ENSG00000182685.7	FALSE	ENSG00000182685	16	BRICD5	protein_coding	1913	BRICHOS domain containing 5 [Source:HGNC Symbol;Acc:HGNC:28309]	283870	Q6PL45	Q6PL45
-0.335851	2.40705	-2.09381	0.0492524	0.435513	ENSG00000166979.12	FALSE	ENSG00000166979	21	EVA1C	protein_coding	2492	eva-1 homolog C [Source:HGNC Symbol;Acc:HGNC:13239]	59271	P58658	P58658
0.294037	3.46016	2.09344	0.0492887	0.435513	ENSG00000165801.9	FALSE	ENSG00000165801	14	ARHGEF40	protein_coding	5919	Rho guanine nucleotide exchange factor 40 [Source:HGNC Symbol;Acc:HGNC:25516]	55701	Q8TER5	Q8TER5
0.232376	3.32247	2.09339	0.0492945	0.435513	ENSG00000121753.12	FALSE	ENSG00000121753	1	ADGRB2	protein_coding	5414	adhesion G protein-coupled receptor B2 [Source:HGNC Symbol;Acc:HGNC:944]	576	O60241	O60241
0.112806	5.35392	2.09333	0.0493	0.435513	ENSG00000113318.9	FALSE	ENSG00000113318	5	MSH3	protein_coding	4092	mutS homolog 3 [Source:HGNC Symbol;Acc:HGNC:7326]	4437	P20585	P20585
0.159866	4.4336	2.09325	0.0493077	0.435513	ENSG00000173960.13	FALSE	ENSG00000173960	2	UBXN2A	protein_coding	6066	UBX domain protein 2A [Source:HGNC Symbol;Acc:HGNC:27265]	165324	P68543	P68543
-0.871646	-0.665222	-2.09311	0.0493215	0.435513	ENSG00000285897.1	FALSE	ENSG00000285897	17	AC004687.2	protein_coding	5828	novel transcript	#N/A	#N/A	#N/A
-0.182559	6.89846	-2.09281	0.0493513	0.435513	ENSG00000142798.19	FALSE	ENSG00000142798	1	HSPG2	protein_coding	14327	heparan sulfate proteoglycan 2 [Source:HGNC Symbol;Acc:HGNC:5273]	3339	P98160	P98160
0.136184	3.89676	2.09279	0.0493526	0.435513	ENSG00000158079.15	FALSE	ENSG00000158079	9	PTPDC1	protein_coding	4517	protein tyrosine phosphatase domain containing 1 [Source:HGNC Symbol;Acc:HGNC:30184]	138639	A0A087WTF0	A0A087WTF0
0.133898	7.01937	2.09275	0.0493568	0.435513	ENSG00000011405.13	FALSE	ENSG00000011405	11	PIK3C2A	protein_coding	8227	phosphatidylinositol-4-phosphate 3-kinase catalytic subunit type 2 alpha [Source:HGNC Symbol;Acc:HGNC:8971]	5286	L7RRS0	L7RRS0
0.152889	3.90433	2.09234	0.0493974	0.435577	ENSG00000167637.16	FALSE	ENSG00000167637	19	ZNF283	protein_coding	5713	zinc finger protein 283 [Source:HGNC Symbol;Acc:HGNC:13077]	284349	K7ESH0	K7ESH0
-0.168645	4.37393	-2.091	0.0495293	0.435611	ENSG00000188130.13	FALSE	ENSG00000188130	22	MAPK12	protein_coding	6248	mitogen-activated protein kinase 12 [Source:HGNC Symbol;Acc:HGNC:6874]	6300	P53778	P53778
0.177494	3.6962	2.09079	0.0495504	0.435611	ENSG00000173846.12	FALSE	ENSG00000173846	1	PLK3	protein_coding	2492	polo like kinase 3 [Source:HGNC Symbol;Acc:HGNC:2154]	1263	Q9H4B4	Q9H4B4
0.114473	7.3657	2.09077	0.0495527	0.435611	ENSG00000102699.5	FALSE	ENSG00000102699	13	PARP4	protein_coding	5474	poly_ADP-ribose_ polymerase family member 4 [Source:HGNC Symbol;Acc:HGNC:271]	143	Q9UKK3	Q9UKK3
0.205141	3.06799	2.09044	0.0495857	0.435611	ENSG00000196646.11	FALSE	ENSG00000196646	19	ZNF136	protein_coding	3643	zinc finger protein 136 [Source:HGNC Symbol;Acc:HGNC:12920]	7695	B4DS70	B4DS70
0.152204	4.72195	2.09029	0.0495998	0.435611	ENSG00000029153.14	FALSE	ENSG00000029153	12	ARNTL2	protein_coding	6785	aryl hydrocarbon receptor nuclear translocator like 2 [Source:HGNC Symbol;Acc:HGNC:18984]	56938	Q8WYA1	Q8WYA1
0.22796	4.37507	2.09	0.0496287	0.435611	ENSG00000107371.12	FALSE	ENSG00000107371	9	EXOSC3	protein_coding	1806	exosome component 3 [Source:HGNC Symbol;Acc:HGNC:17944]	51010	Q9NQT5	Q9NQT5
0.145719	5.55735	2.08994	0.0496346	0.435611	ENSG00000122203.14	FALSE	ENSG00000122203	5	KIAA1191	protein_coding	2991	KIAA1191 [Source:HGNC Symbol;Acc:HGNC:29209]	57179	Q96A73	Q96A73
0.207585	4.28969	2.08941	0.0496867	0.435769	ENSG00000106537.7	FALSE	ENSG00000106537	7	TSPAN13	protein_coding	2093	tetraspanin 13 [Source:HGNC Symbol;Acc:HGNC:21643]	27075	O95857	O95857
-0.688342	-2.06506	-2.0887	0.0497572	0.435769	ENSG00000204936.9	FALSE	ENSG00000204936	19	CD177	protein_coding	2222	CD177 molecule [Source:HGNC Symbol;Acc:HGNC:30072]	57126	A0A087WVM2	A0A087WVM2
-0.106298	8.02109	-2.08857	0.0497701	0.435769	ENSG00000184640.17	FALSE	ENSG00000184640	17	SEPT9	protein_coding	4453	septin 9 [Source:HGNC Symbol;Acc:HGNC:7323]	10801	Q9UHD8	Q9UHD8
0.576506	1.22242	2.08841	0.0497869	0.435769	ENSG00000166803.12	FALSE	ENSG00000166803	15	PCLAF	protein_coding	2194	PCNA clamp associated factor [Source:HGNC Symbol;Acc:HGNC:28961]	9768	Q15004	Q15004
0.143752	5.66824	2.08808	0.0498194	0.435769	ENSG00000073417.14	FALSE	ENSG00000073417	15	PDE8A	protein_coding	4664	phosphodiesterase 8A [Source:HGNC Symbol;Acc:HGNC:8793]	5151	O60658	O60658
-0.19641	3.16783	-2.08627	0.0499995	0.437052	ENSG00000204392.10	FALSE	ENSG00000204392	6	LSM2	protein_coding	876	LSM2 homolog, U6 small nuclear RNA and mRNA degradation associated [Source:HGNC Symbol;Acc:HGNC:13940]	57819	Q9Y333	Q9Y333
-0.427005	1.72185	-2.08554	0.0500723	0.437342	ENSG00000143333.6	FALSE	ENSG00000143333	1	RGS16	protein_coding	2427	regulator of G protein signaling 16 [Source:HGNC Symbol;Acc:HGNC:9997]	6004	O15492	O15492
0.192962	3.71576	2.08501	0.0501247	0.437342	ENSG00000170946.14	FALSE	ENSG00000170946	11	DNAJC24	protein_coding	2745	DnaJ heat shock protein family _Hsp40_ member C24 [Source:HGNC Symbol;Acc:HGNC:26979]	120526	A0A0A0MT77	A0A0A0MT77
-0.935076	-0.305365	-2.08493	0.050133	0.437342	ENSG00000100979.14	FALSE	ENSG00000100979	20	PLTP	protein_coding	2255	phospholipid transfer protein [Source:HGNC Symbol;Acc:HGNC:9093]	5360	P55058	P55058
0.183131	3.9152	2.08409	0.0502169	0.437458	ENSG00000173214.5	FALSE	ENSG00000173214	6	MFSD4B	protein_coding	5958	major facilitator superfamily domain containing 4B [Source:HGNC Symbol;Acc:HGNC:21053]	91749	B3KSA1	B3KSA1
-0.237244	2.46055	-2.08399	0.0502275	0.437458	ENSG00000166171.12	FALSE	ENSG00000166171	10	DPCD	protein_coding	858	deleted in primary ciliary dyskinesia homolog _mouse_ [Source:HGNC Symbol;Acc:HGNC:24542]	25911	Q5JQQ4	Q5JQQ4
0.153079	3.90267	2.08376	0.0502502	0.437458	ENSG00000124587.13	FALSE	ENSG00000124587	6	PEX6	protein_coding	3478	peroxisomal biogenesis factor 6 [Source:HGNC Symbol;Acc:HGNC:8859]	5190	A0A024RD09	A0A024RD09
0.86301	-0.360674	2.08346	0.0502802	0.437458	ENSG00000167081.16	FALSE	ENSG00000167081	9	PBX3	protein_coding	2902	PBX homeobox 3 [Source:HGNC Symbol;Acc:HGNC:8634]	5090	P40426	P40426
0.189731	4.8676	2.0822	0.0504066	0.437631	ENSG00000121940.15	FALSE	ENSG00000121940	1	CLCC1	protein_coding	4803	chloride channel CLIC like 1 [Source:HGNC Symbol;Acc:HGNC:29675]	23155	A0A024R0G0	A0A024R0G0
-0.160958	6.76353	-2.08146	0.0504812	0.437631	ENSG00000229117.8	FALSE	ENSG00000229117	12	RPL41	protein_coding	699	ribosomal protein L41 [Source:HGNC Symbol;Acc:HGNC:10354]	6171	A0A024RB15	A0A024RB15
-0.21859	3.80652	-2.08127	0.0505005	0.437631	ENSG00000181991.15	FALSE	ENSG00000181991	15	MRPS11	protein_coding	3644	mitochondrial ribosomal protein S11 [Source:HGNC Symbol;Acc:HGNC:14050]	64963	P82912	P82912
0.172448	4.51008	2.08065	0.0505623	0.437631	ENSG00000117758.13	FALSE	ENSG00000117758	1	STX12	protein_coding	3079	syntaxin 12 [Source:HGNC Symbol;Acc:HGNC:11430]	23673	Q86Y82	Q86Y82
-0.213544	4.54736	-2.07974	0.0506541	0.437631	ENSG00000106348.17	FALSE	ENSG00000106348	7	IMPDH1	protein_coding	2881	inosine monophosphate dehydrogenase 1 [Source:HGNC Symbol;Acc:HGNC:6052]	3614	B3KRZ3	B3KRZ3
-0.715409	-0.31978	-2.07834	0.050796	0.437631	ENSG00000270168.2	FALSE	ENSG00000270168	16	AC004233.2	protein_coding	2062	novel protein	#N/A	#N/A	#N/A
0.133609	9.74541	2.07826	0.0508035	0.437631	ENSG00000108654.14	FALSE	ENSG00000108654	17	DDX5	protein_coding	3558	DEAD-box helicase 5 [Source:HGNC Symbol;Acc:HGNC:2746]	1655	P17844	P17844
0.170581	3.77038	2.07766	0.0508642	0.437631	ENSG00000037749.12	FALSE	ENSG00000037749	5	MFAP3	protein_coding	2891	microfibril associated protein 3 [Source:HGNC Symbol;Acc:HGNC:7034]	4238	P55082	P55082
0.174633	6.89124	2.07757	0.0508731	0.437631	ENSG00000055332.17	FALSE	ENSG00000055332	2	EIF2AK2	protein_coding	10042	eukaryotic translation initiation factor 2 alpha kinase 2 [Source:HGNC Symbol;Acc:HGNC:9437]	5610	P19525	P19525
0.198169	4.6852	2.07712	0.0509187	0.437631	ENSG00000173852.14	FALSE	ENSG00000173852	7	DPY19L1	protein_coding	5075	dpy-19 like C-mannosyltransferase 1 [Source:HGNC Symbol;Acc:HGNC:22205]	23333	Q2PZI1	Q2PZI1
0.323196	2.40115	2.07711	0.05092	0.437631	ENSG00000130518.16	FALSE	ENSG00000130518	19	IQCN	protein_coding	5520	IQ motif containing N [Source:HGNC Symbol;Acc:HGNC:29350]	80726	Q9H0B3	Q9H0B3
0.102145	7.43343	2.07677	0.0509551	0.437631	ENSG00000104067.16	FALSE	ENSG00000104067	15	TJP1	protein_coding	7950	tight junction protein 1 [Source:HGNC Symbol;Acc:HGNC:11827]	7082	A9CQZ8	A9CQZ8
0.317033	2.72817	2.0766	0.050972	0.437631	ENSG00000178999.12	FALSE	ENSG00000178999	17	AURKB	protein_coding	1254	aurora kinase B [Source:HGNC Symbol;Acc:HGNC:11390]	9212	Q96GD4	Q96GD4
-0.213208	3.52943	-2.07659	0.0509732	0.437631	ENSG00000188735.12	FALSE	ENSG00000188735	12	TMEM120B	protein_coding	7461	transmembrane protein 120B [Source:HGNC Symbol;Acc:HGNC:32008]	144404	A0PK00	A0PK00
-0.103629	5.50624	-2.07648	0.0509837	0.437631	ENSG00000125257.14	FALSE	ENSG00000125257	13	ABCC4	protein_coding	6171	ATP binding cassette subfamily C member 4 [Source:HGNC Symbol;Acc:HGNC:55]	10257	A8K2Q2	A8K2Q2
-0.108901	5.09575	-2.07646	0.0509866	0.437631	ENSG00000156639.11	FALSE	ENSG00000156639	6	ZFAND3	protein_coding	3366	zinc finger AN1-type containing 3 [Source:HGNC Symbol;Acc:HGNC:18019]	60685	A0A024RD12	A0A024RD12
-0.218836	1.6718	-2.07571	0.0510619	0.437631	ENSG00000172889.15	FALSE	ENSG00000172889	9	EGFL7	protein_coding	2125	EGF like domain multiple 7 [Source:HGNC Symbol;Acc:HGNC:20594]	51162	A0A024R8F5	A0A024R8F5
0.219967	2.89385	2.07563	0.0510707	0.437631	ENSG00000166188.2	FALSE	ENSG00000166188	16	ZNF319	protein_coding	4221	zinc finger protein 319 [Source:HGNC Symbol;Acc:HGNC:13644]	57567	Q9P2F9	Q9P2F9
-0.265617	3.15225	-2.07561	0.051072	0.437631	ENSG00000181982.18	FALSE	ENSG00000181982	4	CCDC149	protein_coding	5604	coiled-coil domain containing 149 [Source:HGNC Symbol;Acc:HGNC:25405]	91050	Q6ZUS6	Q6ZUS6
0.383663	1.33935	2.07546	0.0510879	0.437631	ENSG00000131480.8	FALSE	ENSG00000131480	17	AOC2	protein_coding	2657	amine oxidase, copper containing 2 [Source:HGNC Symbol;Acc:HGNC:549]	314	O75106	O75106
0.100125	7.19515	2.07477	0.0511581	0.437631	ENSG00000113648.16	FALSE	ENSG00000113648	5	H2AFY	protein_coding	10982	H2A histone family member Y [Source:HGNC Symbol;Acc:HGNC:4740]	9555	O75367	O75367
-0.37302	1.14536	-2.07454	0.051181	0.437631	ENSG00000106992.18	FALSE	ENSG00000106992	9	AK1	protein_coding	2266	adenylate kinase 1 [Source:HGNC Symbol;Acc:HGNC:361]	203	P00568	P00568
-0.165659	4.68068	-2.07447	0.0511881	0.437631	ENSG00000142039.3	FALSE	ENSG00000142039	19	CCDC97	protein_coding	3322	coiled-coil domain containing 97 [Source:HGNC Symbol;Acc:HGNC:28289]	90324	Q96F63	Q96F63
0.509245	2.22266	2.07424	0.0512115	0.437631	ENSG00000147027.3	FALSE	ENSG00000147027	X	TMEM47	protein_coding	4054	transmembrane protein 47 [Source:HGNC Symbol;Acc:HGNC:18515]	83604	A0A024RBY7	A0A024RBY7
0.249396	3.62456	2.074	0.0512367	0.437631	ENSG00000168116.13	FALSE	ENSG00000168116	6	KIAA1586	protein_coding	2933	KIAA1586 [Source:HGNC Symbol;Acc:HGNC:21360]	57691	B4DIC2	B4DIC2
0.18937	4.30839	2.07399	0.0512375	0.437631	ENSG00000130150.11	FALSE	ENSG00000130150	X	MOSPD2	protein_coding	4163	motile sperm domain containing 2 [Source:HGNC Symbol;Acc:HGNC:28381]	158747	Q8NHP6	Q8NHP6
0.689013	-0.309433	2.07396	0.05124	0.437631	ENSG00000130598.15	FALSE	ENSG00000130598	11	TNNI2	protein_coding	745	troponin I2, fast skeletal type [Source:HGNC Symbol;Acc:HGNC:11946]	7136	P48788	P48788
-0.174224	6.26836	-2.07371	0.0512662	0.437631	ENSG00000164050.12	FALSE	ENSG00000164050	3	PLXNB1	protein_coding	7308	plexin B1 [Source:HGNC Symbol;Acc:HGNC:9103]	5364	O43157	O43157
0.148695	5.6219	2.07333	0.0513046	0.437631	ENSG00000095002.14	FALSE	ENSG00000095002	2	MSH2	protein_coding	7893	mutS homolog 2 [Source:HGNC Symbol;Acc:HGNC:7325]	4436	P43246	P43246
-0.0901182	5.91262	-2.07333	0.0513048	0.437631	ENSG00000134882.15	FALSE	ENSG00000134882	13	UBAC2	protein_coding	2525	UBA domain containing 2 [Source:HGNC Symbol;Acc:HGNC:20486]	337867	A0A024RE02	A0A024RE02
-0.225902	3.69974	-2.07078	0.0515649	0.439396	ENSG00000149474.13	FALSE	ENSG00000149474	20	KAT14	protein_coding	3618	lysine acetyltransferase 14 [Source:HGNC Symbol;Acc:HGNC:15904]	57325	Q9H8E8	Q9H8E8
0.491707	1.43414	2.07065	0.0515789	0.439396	ENSG00000221869.4	FALSE	ENSG00000221869	8	CEBPD	protein_coding	2178	CCAAT enhancer binding protein delta [Source:HGNC Symbol;Acc:HGNC:1835]	1052	P49716	P49716
-0.321205	2.69305	-2.06805	0.0518463	0.440824	ENSG00000010626.14	FALSE	ENSG00000010626	12	LRRC23	protein_coding	1628	leucine rich repeat containing 23 [Source:HGNC Symbol;Acc:HGNC:19138]	10233	A8K8K2	A8K8K2
-0.284299	2.00804	-2.06749	0.0519037	0.440824	ENSG00000147586.9	FALSE	ENSG00000147586	8	MRPS28	protein_coding	850	mitochondrial ribosomal protein S28 [Source:HGNC Symbol;Acc:HGNC:14513]	28957	A0A0S2Z563	A0A0S2Z563
-0.189574	3.47185	-2.06714	0.0519396	0.440824	ENSG00000101220.17	FALSE	ENSG00000101220	20	C20ORF27	protein_coding	1886	chromosome 20 open reading frame 27 [Source:HGNC Symbol;Acc:HGNC:15873]	54976	Q9GZN8	Q9GZN8
-0.184946	5.33679	-2.06713	0.051941	0.440824	ENSG00000093010.13	FALSE	ENSG00000093010	22	COMT	protein_coding	2437	catechol-O-methyltransferase [Source:HGNC Symbol;Acc:HGNC:2228]	1312	A0A140VJG8	A0A140VJG8
0.408596	-0.0274948	2.06705	0.0519491	0.440824	ENSG00000177688.6	FALSE	ENSG00000177688	6	SUMO4	protein_coding	1066	small ubiquitin-like modifier 4 [Source:HGNC Symbol;Acc:HGNC:21181]	387082	Q6EEV6	Q6EEV6
0.182165	4.33777	2.06676	0.0519794	0.440824	ENSG00000167378.8	FALSE	ENSG00000167378	19	IRGQ	protein_coding	9685	immunity related GTPase Q [Source:HGNC Symbol;Acc:HGNC:24868]	126298	Q8WZA9	Q8WZA9
0.169463	4.36427	2.06672	0.0519827	0.440824	ENSG00000104756.15	FALSE	ENSG00000104756	8	KCTD9	protein_coding	3401	potassium channel tetramerization domain containing 9 [Source:HGNC Symbol;Acc:HGNC:22401]	54793	Q7L273	Q7L273
-0.844898	-1.97692	-2.06625	0.0520313	0.44095	ENSG00000249715.11	FALSE	ENSG00000249715	2	FER1L5	protein_coding	6513	fer-1 like family member 5 [Source:HGNC Symbol;Acc:HGNC:19044]	90342	A0AVI2	A0AVI2
0.178223	4.77619	2.06584	0.0520742	0.441028	ENSG00000138600.9	FALSE	ENSG00000138600	15	SPPL2A	protein_coding	7372	signal peptide peptidase like 2A [Source:HGNC Symbol;Acc:HGNC:30227]	84888	Q8TCT8	Q8TCT8
-0.219306	3.2213	-2.06388	0.0522767	0.441622	ENSG00000041988.15	FALSE	ENSG00000041988	1	THAP3	protein_coding	2053	THAP domain containing 3 [Source:HGNC Symbol;Acc:HGNC:20855]	90326	Q8WTV1	Q8WTV1
-0.190977	3.21612	-2.06386	0.0522793	0.441622	ENSG00000198736.11	FALSE	ENSG00000198736	16	MSRB1	protein_coding	1423	methionine sulfoxide reductase B1 [Source:HGNC Symbol;Acc:HGNC:14133]	51734	Q9NZV6	Q9NZV6
-0.125283	4.63667	-2.06356	0.0523106	0.441622	ENSG00000213341.10	FALSE	ENSG00000213341	10	CHUK	protein_coding	4845	conserved helix-loop-helix ubiquitous kinase [Source:HGNC Symbol;Acc:HGNC:1974]	1147	O15111	O15111
-0.214564	8.27395	-2.06342	0.0523249	0.441622	ENSG00000134294.13	FALSE	ENSG00000134294	12	SLC38A2	protein_coding	4888	solute carrier family 38 member 2 [Source:HGNC Symbol;Acc:HGNC:13448]	54407	Q8NHT5	Q8NHT5
-0.136957	4.46019	-2.06332	0.0523351	0.441622	ENSG00000113812.13	FALSE	ENSG00000113812	3	ACTR8	protein_coding	3629	ARP8 actin related protein 8 homolog [Source:HGNC Symbol;Acc:HGNC:14672]	93973	Q9H981	Q9H981
-0.134095	3.84826	-2.0629	0.0523792	0.441622	ENSG00000129055.12	FALSE	ENSG00000129055	3	ANAPC13	protein_coding	1840	anaphase promoting complex subunit 13 [Source:HGNC Symbol;Acc:HGNC:24540]	25847	A8K3Z6	A8K3Z6
-0.295434	2.72502	-2.06288	0.052381	0.441622	ENSG00000069482.6	FALSE	ENSG00000069482	11	GAL	protein_coding	818	galanin and GMAP prepropeptide [Source:HGNC Symbol;Acc:HGNC:4114]	51083	P22466	P22466
-0.213266	3.07168	-2.06214	0.052458	0.441777	ENSG00000130768.14	FALSE	ENSG00000130768	1	SMPDL3B	protein_coding	1913	sphingomyelin phosphodiesterase acid like 3B [Source:HGNC Symbol;Acc:HGNC:21416]	27293	Q92485	Q92485
0.118838	6.86318	2.06205	0.0524669	0.441777	ENSG00000078618.21	FALSE	ENSG00000078618	1	NRDC	protein_coding	3895	nardilysin convertase [Source:HGNC Symbol;Acc:HGNC:7995]	4898	O43847	O43847
0.158786	4.98501	2.0615	0.0525248	0.44198	ENSG00000140992.18	FALSE	ENSG00000140992	16	PDPK1	protein_coding	7241	3-phosphoinositide dependent protein kinase 1 [Source:HGNC Symbol;Acc:HGNC:8816]	5170	O15530	O15530
-0.253403	1.89087	-2.06068	0.0526098	0.44241	ENSG00000164620.8	FALSE	ENSG00000164620	5	RELL2	protein_coding	2520	RELT like 2 [Source:HGNC Symbol;Acc:HGNC:26902]	285613	Q8NC24	Q8NC24
0.160644	7.20628	2.06015	0.0526655	0.442593	ENSG00000139318.7	FALSE	ENSG00000139318	12	DUSP6	protein_coding	4400	dual specificity phosphatase 6 [Source:HGNC Symbol;Acc:HGNC:3072]	1848	A0A024RBC1	A0A024RBC1
0.124161	5.93782	2.0591	0.0527753	0.443155	ENSG00000197603.13	FALSE	ENSG00000197603	5	CPLANE1	protein_coding	11199	ciliogenesis and planar polarity effector 1 [Source:HGNC Symbol;Acc:HGNC:25801]	65250	Q9H799	Q9H799
0.258941	1.81825	2.05886	0.0528001	0.443155	ENSG00000150456.10	FALSE	ENSG00000150456	13	EEF1AKMT1	protein_coding	1042	EEF1A lysine methyltransferase 1 [Source:HGNC Symbol;Acc:HGNC:27351]	221143	A0A024RDN3	A0A024RDN3
-0.150066	5.21627	-2.05811	0.0528794	0.443444	ENSG00000133243.8	FALSE	ENSG00000133243	19	BTBD2	protein_coding	2763	BTB domain containing 2 [Source:HGNC Symbol;Acc:HGNC:15504]	55643	Q9BX70	Q9BX70
0.176498	7.16221	2.05762	0.0529299	0.443444	ENSG00000072364.12	FALSE	ENSG00000072364	5	AFF4	protein_coding	9552	AF4/FMR2 family member 4 [Source:HGNC Symbol;Acc:HGNC:17869]	27125	Q9UHB7	Q9UHB7
0.222605	4.19237	2.05724	0.05297	0.443444	ENSG00000012174.11	FALSE	ENSG00000012174	X	MBTPS2	protein_coding	4457	membrane bound transcription factor peptidase, site 2 [Source:HGNC Symbol;Acc:HGNC:15455]	51360	O43462	O43462
0.17633	5.4371	2.05724	0.0529703	0.443444	ENSG00000162607.12	FALSE	ENSG00000162607	1	USP1	protein_coding	3996	ubiquitin specific peptidase 1 [Source:HGNC Symbol;Acc:HGNC:12607]	7398	O94782	O94782
0.161635	6.62648	2.0558	0.0531212	0.444134	ENSG00000139163.15	FALSE	ENSG00000139163	12	ETNK1	protein_coding	7159	ethanolamine kinase 1 [Source:HGNC Symbol;Acc:HGNC:24649]	55500	Q9HBU6	Q9HBU6
-0.328718	10.3452	-2.05535	0.0531696	0.444134	ENSG00000198899.2	FALSE	ENSG00000198899	M	MT-ATP6	protein_coding	681	mitochondrially encoded ATP synthase membrane subunit 6 [Source:HGNC Symbol;Acc:HGNC:7414]	4508	P00846	P00846
-0.15106	5.11628	-2.05518	0.053187	0.444134	ENSG00000184840.11	FALSE	ENSG00000184840	5	TMED9	protein_coding	1473	transmembrane p24 trafficking protein 9 [Source:HGNC Symbol;Acc:HGNC:24878]	54732	A0A024R7M0	A0A024R7M0
-0.135529	5.10678	-2.05513	0.053192	0.444134	ENSG00000104689.9	FALSE	ENSG00000104689	8	TNFRSF10A	protein_coding	2714	TNF receptor superfamily member 10a [Source:HGNC Symbol;Acc:HGNC:11904]	8797	O00220	O00220
-0.217324	3.36742	-2.05473	0.0532347	0.444134	ENSG00000007866.20	FALSE	ENSG00000007866	6	TEAD3	protein_coding	2983	TEA domain transcription factor 3 [Source:HGNC Symbol;Acc:HGNC:11716]	7005	Q99594	Q99594
0.787152	-1.24169	2.05436	0.0532739	0.444134	ENSG00000197520.10	FALSE	ENSG00000197520	1	FAM177B	protein_coding	1994	family with sequence similarity 177 member B [Source:HGNC Symbol;Acc:HGNC:34395]	400823	A6PVY3	A6PVY3
-0.207772	3.99802	-2.0542	0.0532907	0.444134	ENSG00000137700.18	FALSE	ENSG00000137700	11	SLC37A4	protein_coding	5862	solute carrier family 37 member 4 [Source:HGNC Symbol;Acc:HGNC:4061]	2542	A0A024R3H9	A0A024R3H9
0.143645	4.40135	2.05299	0.0534188	0.44459	ENSG00000111652.9	FALSE	ENSG00000111652	12	COPS7A	protein_coding	2127	COP9 signalosome subunit 7A [Source:HGNC Symbol;Acc:HGNC:16758]	50813	Q9UBW8	Q9UBW8
-0.258197	4.32429	-2.05248	0.0534726	0.44459	ENSG00000167566.16	FALSE	ENSG00000167566	12	NCKAP5L	protein_coding	4900	NCK associated protein 5 like [Source:HGNC Symbol;Acc:HGNC:29321]	57701	Q9HCH0	Q9HCH0
0.740943	-0.556087	2.0523	0.0534915	0.44459	ENSG00000243696.4	FALSE	ENSG00000243696	3	AC006254.1	protein_coding	5640	novel MUSTN1-ITIH4 readthrough	#N/A	#N/A	#N/A
0.320884	2.75868	2.05116	0.0536119	0.44459	ENSG00000100564.8	FALSE	ENSG00000100564	14	PIGH	protein_coding	1420	phosphatidylinositol glycan anchor biosynthesis class H [Source:HGNC Symbol;Acc:HGNC:8964]	5283	Q14442	Q14442
0.353606	3.55367	2.05084	0.0536465	0.44459	ENSG00000164109.13	FALSE	ENSG00000164109	4	MAD2L1	protein_coding	5468	mitotic arrest deficient 2 like 1 [Source:HGNC Symbol;Acc:HGNC:6763]	4085	Q13257	Q13257
0.771604	-0.42368	2.05056	0.0536763	0.44459	ENSG00000255819.7	FALSE	ENSG00000255819	12	KLRC4-KLRK1	protein_coding	1750	KLRC4-KLRK1 readthrough [Source:HGNC Symbol;Acc:HGNC:48357]	#N/A	#N/A	#N/A
-0.712095	0.449563	-2.05052	0.0536806	0.44459	ENSG00000138100.13	FALSE	ENSG00000138100	2	TRIM54	protein_coding	2027	tripartite motif containing 54 [Source:HGNC Symbol;Acc:HGNC:16008]	57159	Q9BYV2	Q9BYV2
0.868388	-0.528602	2.05048	0.0536844	0.44459	ENSG00000258643.5	FALSE	ENSG00000258643	14	BCL2L2-PABPN1	protein_coding	1366	BCL2L2-PABPN1 readthrough [Source:HGNC Symbol;Acc:HGNC:42959]	100529063	#N/A	#N/A
-0.520731	1.70594	-2.0502	0.0537141	0.44459	ENSG00000174628.16	FALSE	ENSG00000174628	16	IQCK	protein_coding	3482	IQ motif containing K [Source:HGNC Symbol;Acc:HGNC:28556]	124152	B4E1V3	B4E1V3
0.285689	3.92661	2.05014	0.0537204	0.44459	ENSG00000109805.9	FALSE	ENSG00000109805	4	NCAPG	protein_coding	4661	non-SMC condensin I complex subunit G [Source:HGNC Symbol;Acc:HGNC:24304]	64151	Q9BPX3	Q9BPX3
0.145112	5.37625	2.04983	0.0537534	0.44459	ENSG00000168014.16	FALSE	ENSG00000168014	11	C2CD3	protein_coding	7960	C2 calcium dependent domain containing 3 [Source:HGNC Symbol;Acc:HGNC:24564]	26005	Q4AC94	Q4AC94
-0.136505	5.45983	-2.04978	0.0537588	0.44459	ENSG00000107262.21	FALSE	ENSG00000107262	9	BAG1	protein_coding	3786	BCL2 associated athanogene 1 [Source:HGNC Symbol;Acc:HGNC:937]	573	Q99933	Q99933
0.457647	1.88416	2.04947	0.0537922	0.44459	ENSG00000134242.15	FALSE	ENSG00000134242	1	PTPN22	protein_coding	3654	protein tyrosine phosphatase, non-receptor type 22 [Source:HGNC Symbol;Acc:HGNC:9652]	26191	B4DZW8	B4DZW8
0.219121	3.70408	2.04919	0.0538217	0.44459	ENSG00000136826.14	FALSE	ENSG00000136826	9	KLF4	protein_coding	2813	Kruppel like factor 4 [Source:HGNC Symbol;Acc:HGNC:6348]	9314	O43474	O43474
-0.232109	4.42363	-2.04884	0.0538595	0.444621	ENSG00000275832.4	FALSE	ENSG00000275832	17	ARHGAP23	protein_coding	5964	Rho GTPase activating protein 23 [Source:HGNC Symbol;Acc:HGNC:29293]	57636	Q9P227	Q9P227
0.571792	0.0919536	2.04781	0.0539695	0.445121	ENSG00000167207.13	FALSE	ENSG00000167207	16	NOD2	protein_coding	5494	nucleotide binding oligomerization domain containing 2 [Source:HGNC Symbol;Acc:HGNC:5331]	64127	Q9HC29	Q9HC29
0.0810448	6.81584	2.04756	0.0539957	0.445121	ENSG00000167258.13	FALSE	ENSG00000167258	17	CDK12	protein_coding	8336	cyclin dependent kinase 12 [Source:HGNC Symbol;Acc:HGNC:24224]	51755	Q9NYV4	Q9NYV4
0.284573	3.68693	2.04728	0.054026	0.445121	ENSG00000168612.4	FALSE	ENSG00000168612	20	ZSWIM1	protein_coding	2769	zinc finger SWIM-type containing 1 [Source:HGNC Symbol;Acc:HGNC:16155]	90204	Q9BR11	Q9BR11
0.24044	3.15551	2.04672	0.054086	0.445121	ENSG00000205808.5	FALSE	ENSG00000205808	9	PLPP6	protein_coding	2944	phospholipid phosphatase 6 [Source:HGNC Symbol;Acc:HGNC:23682]	403313	Q8IY26	Q8IY26
0.19	4.75765	2.04653	0.054106	0.445121	ENSG00000077458.12	FALSE	ENSG00000077458	11	FAM76B	protein_coding	3952	family with sequence similarity 76 member B [Source:HGNC Symbol;Acc:HGNC:28492]	143684	F5GX09	F5GX09
-0.889084	1.1091	-2.04622	0.054139	0.445121	ENSG00000165125.19	FALSE	ENSG00000165125	7	TRPV6	protein_coding	10433	transient receptor potential cation channel subfamily V member 6 [Source:HGNC Symbol;Acc:HGNC:14006]	55503	Q9H1D0	Q9H1D0
0.498225	0.549598	2.04604	0.0541584	0.445121	ENSG00000143217.8	FALSE	ENSG00000143217	1	NECTIN4	protein_coding	3502	nectin cell adhesion molecule 4 [Source:HGNC Symbol;Acc:HGNC:19688]	81607	K4PZ75	K4PZ75
0.144172	6.61367	2.04561	0.0542048	0.445222	ENSG00000171862.10	FALSE	ENSG00000171862	10	PTEN	protein_coding	9027	phosphatase and tensin homolog [Source:HGNC Symbol;Acc:HGNC:9588]	5728	F6KD01	F6KD01
0.656955	1.72329	2.04493	0.0542769	0.445478	ENSG00000198682.12	FALSE	ENSG00000198682	10	PAPSS2	protein_coding	3949	3'-phosphoadenosine 5'-phosphosulfate synthase 2 [Source:HGNC Symbol;Acc:HGNC:8604]	9060	O95340	O95340
-0.259019	2.26305	-2.04468	0.0543041	0.445478	ENSG00000236104.2	FALSE	ENSG00000236104	6	ZBTB22	protein_coding	2651	zinc finger and BTB domain containing 22 [Source:HGNC Symbol;Acc:HGNC:13085]	9278	A0A1U9X8V3	A0A1U9X8V3
-0.186015	3.08288	-2.04393	0.0543852	0.44584	ENSG00000224877.3	FALSE	ENSG00000224877	17	NDUFAF8	protein_coding	741	NADH:ubiquinone oxidoreductase complex assembly factor 8 [Source:HGNC Symbol;Acc:HGNC:33551]	284184	A1L188	A1L188
-0.733813	-1.71734	-2.04356	0.0544244	0.44584	ENSG00000119782.13	FALSE	ENSG00000119782	2	FKBP1B	protein_coding	1601	FK506 binding protein 1B [Source:HGNC Symbol;Acc:HGNC:3712]	2281	F8W6G9	F8W6G9
0.300958	2.13517	2.04332	0.0544507	0.44584	ENSG00000082014.16	FALSE	ENSG00000082014	7	SMARCD3	protein_coding	2415	SWI/SNF related, matrix associated, actin dependent regulator of chromatin, subfamily d, member 3 [Source:HGNC Symbol;Acc:HGNC:11108]	6604	Q6STE5	Q6STE5
-0.145561	6.97467	-2.04223	0.0545683	0.446461	ENSG00000128050.8	FALSE	ENSG00000128050	4	PAICS	protein_coding	6480	phosphoribosylaminoimidazole carboxylase and phosphoribosylaminoimidazolesuccinocarboxamide synthase [Source:HGNC Symbol;Acc:HGNC:8587]	10606	A0A024RD93	A0A024RD93
0.100414	5.00585	2.04198	0.0545948	0.446461	ENSG00000135913.10	FALSE	ENSG00000135913	2	USP37	protein_coding	8032	ubiquitin specific peptidase 37 [Source:HGNC Symbol;Acc:HGNC:20063]	57695	A0A024R416	A0A024R416
0.73363	-0.686184	2.04162	0.0546337	0.4465	ENSG00000165807.7	FALSE	ENSG00000165807	14	PPP1R36	protein_coding	1686	protein phosphatase 1 regulatory subunit 36 [Source:HGNC Symbol;Acc:HGNC:20097]	145376	Q96LQ0	Q96LQ0
0.204843	6.30422	2.04118	0.0546814	0.446611	ENSG00000168374.10	FALSE	ENSG00000168374	3	ARF4	protein_coding	1660	ADP ribosylation factor 4 [Source:HGNC Symbol;Acc:HGNC:655]	378	P18085	P18085
-0.130819	4.89559	-2.04071	0.0547321	0.446745	ENSG00000117174.10	FALSE	ENSG00000117174	1	ZNHIT6	protein_coding	6080	zinc finger HIT-type containing 6 [Source:HGNC Symbol;Acc:HGNC:26089]	54680	Q9NWK9	Q9NWK9
0.208505	2.69947	2.03985	0.0548252	0.447064	ENSG00000173409.13	FALSE	ENSG00000173409	1	ARV1	protein_coding	1335	ARV1 homolog, fatty acid homeostasis modulator [Source:HGNC Symbol;Acc:HGNC:29561]	64801	Q9H2C2	Q9H2C2
-0.1307	6.25307	-2.03972	0.0548396	0.447064	ENSG00000141002.19	FALSE	ENSG00000141002	16	TCF25	protein_coding	2688	transcription factor 25 [Source:HGNC Symbol;Acc:HGNC:29181]	22980	Q9BQ70	Q9BQ70
0.153714	5.41912	2.03719	0.0551138	0.448775	ENSG00000064313.11	FALSE	ENSG00000064313	8	TAF2	protein_coding	5048	TATA-box binding protein associated factor 2 [Source:HGNC Symbol;Acc:HGNC:11536]	6873	B3KMD8	B3KMD8
0.172947	3.83788	2.03711	0.0551223	0.448775	ENSG00000159388.5	FALSE	ENSG00000159388	1	BTG2	protein_coding	2712	BTG anti-proliferation factor 2 [Source:HGNC Symbol;Acc:HGNC:1131]	7832	P78543	P78543
-0.16624	6.09059	-2.03646	0.0551937	0.448775	ENSG00000135373.12	FALSE	ENSG00000135373	11	EHF	protein_coding	3150	ETS homologous factor [Source:HGNC Symbol;Acc:HGNC:3246]	26298	Q9NZC4	Q9NZC4
0.230515	2.50514	2.03627	0.055214	0.448775	ENSG00000000460.16	FALSE	ENSG00000000460	1	C1ORF112	protein_coding	4355	chromosome 1 open reading frame 112 [Source:HGNC Symbol;Acc:HGNC:25565]	55732	A0A024R922	A0A024R922
0.22371	2.57861	2.03621	0.0552211	0.448775	ENSG00000100483.13	FALSE	ENSG00000100483	14	VCPKMT	protein_coding	1849	valosin containing protein lysine methyltransferase [Source:HGNC Symbol;Acc:HGNC:20352]	79609	Q9H867	Q9H867
-0.239683	5.89391	-2.03569	0.0552772	0.448951	ENSG00000138413.13	FALSE	ENSG00000138413	2	IDH1	protein_coding	2441	isocitrate dehydrogenase _NADP_+__ 1, cytosolic [Source:HGNC Symbol;Acc:HGNC:5382]	3417	O75874	O75874
-0.19697	2.78815	-2.03421	0.0554392	0.449111	ENSG00000152056.16	FALSE	ENSG00000152056	2	AP1S3	protein_coding	2515	adaptor related protein complex 1 subunit sigma 3 [Source:HGNC Symbol;Acc:HGNC:18971]	130340	Q96PC3	Q96PC3
-0.145112	3.61409	-2.03373	0.0554918	0.449111	ENSG00000196470.11	FALSE	ENSG00000196470	16	SIAH1	protein_coding	3352	siah E3 ubiquitin protein ligase 1 [Source:HGNC Symbol;Acc:HGNC:10857]	6477	Q8IUQ4	Q8IUQ4
0.125142	6.49992	2.03329	0.05554	0.449111	ENSG00000103479.15	FALSE	ENSG00000103479	16	RBL2	protein_coding	4906	RB transcriptional corepressor like 2 [Source:HGNC Symbol;Acc:HGNC:9894]	5934	Q08999	Q08999
0.232466	5.23569	2.03323	0.0555463	0.449111	ENSG00000160888.6	FALSE	ENSG00000160888	19	IER2	protein_coding	2934	immediate early response 2 [Source:HGNC Symbol;Acc:HGNC:28871]	9592	A0A024R7H1	A0A024R7H1
0.133589	4.75973	2.03308	0.055563	0.449111	ENSG00000186812.12	FALSE	ENSG00000186812	18	ZNF397	protein_coding	5251	zinc finger protein 397 [Source:HGNC Symbol;Acc:HGNC:18818]	84307	Q8NF99	Q8NF99
-0.228225	3.77292	-2.03305	0.0555656	0.449111	ENSG00000169231.13	FALSE	ENSG00000169231	1	THBS3	protein_coding	3200	thrombospondin 3 [Source:HGNC Symbol;Acc:HGNC:11787]	7059	F5H4Z8	F5H4Z8
-0.156896	4.68829	-2.03304	0.0555669	0.449111	ENSG00000162430.16	FALSE	ENSG00000162430	1	SELENON	protein_coding	4334	selenoprotein N [Source:HGNC Symbol;Acc:HGNC:15999]	57190	Q9NZV5	Q9NZV5
0.214595	3.58822	2.033	0.0555719	0.449111	ENSG00000143363.16	FALSE	ENSG00000143363	1	PRUNE1	protein_coding	2997	prune exopolyphosphatase 1 [Source:HGNC Symbol;Acc:HGNC:13420]	58497	Q86TP1	Q86TP1
0.400476	-0.205691	2.03268	0.055607	0.449117	ENSG00000177599.12	FALSE	ENSG00000177599	19	ZNF491	protein_coding	2471	zinc finger protein 491 [Source:HGNC Symbol;Acc:HGNC:23706]	126069	Q8N8L2	Q8N8L2
-0.148584	5.78922	-2.03206	0.0556743	0.449383	ENSG00000112473.17	FALSE	ENSG00000112473	6	SLC39A7	protein_coding	2409	solute carrier family 39 member 7 [Source:HGNC Symbol;Acc:HGNC:4927]	7922	A0A024RCX7	A0A024RCX7
0.160049	4.08932	2.03072	0.0558224	0.450301	ENSG00000213020.9	FALSE	ENSG00000213020	19	ZNF611	protein_coding	4796	zinc finger protein 611 [Source:HGNC Symbol;Acc:HGNC:28766]	81856	Q8N823	Q8N823
-0.487175	2.54137	-2.02969	0.0559351	0.450931	ENSG00000100097.11	FALSE	ENSG00000100097	22	LGALS1	protein_coding	637	galectin 1 [Source:HGNC Symbol;Acc:HGNC:6561]	3956	P09382	P09382
-0.103774	6.18716	-2.02854	0.0560622	0.451677	ENSG00000151779.12	FALSE	ENSG00000151779	2	NBAS	protein_coding	7281	neuroblastoma amplified sequence [Source:HGNC Symbol;Acc:HGNC:15625]	51594	A2RRP1	A2RRP1
0.174544	4.77755	2.02759	0.056168	0.452251	ENSG00000023041.11	FALSE	ENSG00000023041	10	ZDHHC6	protein_coding	2906	zinc finger DHHC-type containing 6 [Source:HGNC Symbol;Acc:HGNC:19160]	64429	Q9H6R6	Q9H6R6
-0.351762	3.12335	-2.02493	0.0564633	0.454349	ENSG00000122507.20	FALSE	ENSG00000122507	7	BBS9	protein_coding	4027	Bardet-Biedl syndrome 9 [Source:HGNC Symbol;Acc:HGNC:30000]	27241	Q3SYG4	Q3SYG4
-0.165176	4.46992	-2.0243	0.0565333	0.454632	ENSG00000151576.10	FALSE	ENSG00000151576	3	QTRT2	protein_coding	4023	queuine tRNA-ribosyltransferase accessory subunit 2 [Source:HGNC Symbol;Acc:HGNC:25771]	79691	Q9H974	Q9H974
0.119171	5.14162	2.02318	0.0566577	0.455253	ENSG00000085449.14	FALSE	ENSG00000085449	2	WDFY1	protein_coding	4660	WD repeat and FYVE domain containing 1 [Source:HGNC Symbol;Acc:HGNC:20451]	57590	A0A024R488	A0A024R488
-0.178055	5.41135	-2.02287	0.0566919	0.455253	ENSG00000277443.2	FALSE	ENSG00000277443	6	MARCKS	protein_coding	4275	myristoylated alanine rich protein kinase C substrate [Source:HGNC Symbol;Acc:HGNC:6759]	4082	P29966	P29966
0.199311	4.77007	2.02267	0.056715	0.455253	ENSG00000162512.15	FALSE	ENSG00000162512	1	SDC3	protein_coding	6392	syndecan 3 [Source:HGNC Symbol;Acc:HGNC:10660]	9672	O75056	O75056
0.169533	4.71964	2.02134	0.0568634	0.456046	ENSG00000179833.4	FALSE	ENSG00000179833	2	SERTAD2	protein_coding	5549	SERTA domain containing 2 [Source:HGNC Symbol;Acc:HGNC:30784]	9792	Q14140	Q14140
-0.312668	3.85414	-2.02064	0.0569416	0.456046	ENSG00000125877.12	FALSE	ENSG00000125877	20	ITPA	protein_coding	1185	inosine triphosphatase [Source:HGNC Symbol;Acc:HGNC:6176]	3704	A0A0S2Z423	A0A0S2Z423
0.176955	3.72139	2.02048	0.0569594	0.456046	ENSG00000115828.16	FALSE	ENSG00000115828	2	QPCT	protein_coding	1739	glutaminyl-peptide cyclotransferase [Source:HGNC Symbol;Acc:HGNC:9753]	25797	Q16769	Q16769
-0.104837	5.26228	-2.02042	0.0569668	0.456046	ENSG00000165138.17	FALSE	ENSG00000165138	9	ANKS6	protein_coding	7164	ankyrin repeat and sterile alpha motif domain containing 6 [Source:HGNC Symbol;Acc:HGNC:26724]	203286	B3KXP1	B3KXP1
0.281088	2.77362	2.02022	0.0569883	0.456046	ENSG00000102362.15	FALSE	ENSG00000102362	X	SYTL4	protein_coding	4847	synaptotagmin like 4 [Source:HGNC Symbol;Acc:HGNC:15588]	94121	A0A024RCF8	A0A024RCF8
-0.131355	4.95935	-2.01962	0.0570558	0.456108	ENSG00000104859.14	FALSE	ENSG00000104859	19	CLASRP	protein_coding	2769	CLK4 associating serine/arginine rich protein [Source:HGNC Symbol;Acc:HGNC:17731]	11129	Q8N2M8	Q8N2M8
0.268345	2.28949	2.01953	0.0570659	0.456108	ENSG00000099330.8	FALSE	ENSG00000099330	19	OCEL1	protein_coding	1485	occludin/ELL domain containing 1 [Source:HGNC Symbol;Acc:HGNC:26221]	79629	Q9H607	Q9H607
0.453466	-0.398697	2.01865	0.0571651	0.456533	ENSG00000115468.11	FALSE	ENSG00000115468	2	EFHD1	protein_coding	2259	EF-hand domain family member D1 [Source:HGNC Symbol;Acc:HGNC:29556]	80303	Q9BUP0	Q9BUP0
-0.105187	5.47167	-2.01838	0.0571956	0.456533	ENSG00000125952.18	FALSE	ENSG00000125952	14	MAX	protein_coding	3155	MYC associated factor X [Source:HGNC Symbol;Acc:HGNC:6913]	4149	P61244	P61244
-0.161408	4.73668	-2.01769	0.0572733	0.456533	ENSG00000169217.8	FALSE	ENSG00000169217	16	CD2BP2	protein_coding	3421	CD2 cytoplasmic tail binding protein 2 [Source:HGNC Symbol;Acc:HGNC:1656]	10421	A0A024QZC1	A0A024QZC1
-0.119327	5.5493	-2.01752	0.0572922	0.456533	ENSG00000214078.12	FALSE	ENSG00000214078	20	CPNE1	protein_coding	2147	copine 1 [Source:HGNC Symbol;Acc:HGNC:2314]	8904	B0QZ18	B0QZ18
-0.102101	5.30388	-2.01751	0.0572937	0.456533	ENSG00000105186.15	FALSE	ENSG00000105186	19	ANKRD27	protein_coding	4450	ankyrin repeat domain 27 [Source:HGNC Symbol;Acc:HGNC:25310]	84079	Q96NW4	Q96NW4
-0.170119	4.97692	-2.01609	0.0574533	0.457467	ENSG00000101849.16	FALSE	ENSG00000101849	X	TBL1X	protein_coding	7061	transducin beta like 1 X-linked [Source:HGNC Symbol;Acc:HGNC:11585]	6907	A0A024RBV9	A0A024RBV9
-0.192236	4.22286	-2.01576	0.057491	0.457467	ENSG00000021300.13	FALSE	ENSG00000021300	11	PLEKHB1	protein_coding	2380	pleckstrin homology domain containing B1 [Source:HGNC Symbol;Acc:HGNC:19079]	58473	A0A024R5J2	A0A024R5J2
0.138541	7.55221	2.01441	0.0576437	0.457467	ENSG00000204525.16	FALSE	ENSG00000204525	6	HLA-C	protein_coding	1880	major histocompatibility complex, class I, C [Source:HGNC Symbol;Acc:HGNC:4933]	3107	O19617	O19617
0.1648	6.13705	2.01436	0.0576492	0.457467	ENSG00000177853.14	FALSE	ENSG00000177853	10	ZNF518A	protein_coding	8270	zinc finger protein 518A [Source:HGNC Symbol;Acc:HGNC:29009]	9849	Q6AHZ1	Q6AHZ1
0.167432	3.06367	2.01401	0.0576888	0.457467	ENSG00000126903.15	FALSE	ENSG00000126903	X	SLC10A3	protein_coding	2161	solute carrier family 10 member 3 [Source:HGNC Symbol;Acc:HGNC:22979]	8273	P09131	P09131
-0.136825	4.36923	-2.01362	0.0577329	0.457467	ENSG00000100395.14	FALSE	ENSG00000100395	22	L3MBTL2	protein_coding	5875	L3MBTL2, polycomb repressive complex 1 subunit [Source:HGNC Symbol;Acc:HGNC:18594]	83746	A0A0S2Z5X6	A0A0S2Z5X6
-0.115898	6.39555	-2.01353	0.0577433	0.457467	ENSG00000107937.18	FALSE	ENSG00000107937	10	GTPBP4	protein_coding	5075	GTP binding protein 4 [Source:HGNC Symbol;Acc:HGNC:21535]	23560	D2CFK9	D2CFK9
-0.471864	1.10118	-2.01346	0.057751	0.457467	ENSG00000168389.17	FALSE	ENSG00000168389	1	MFSD2A	protein_coding	2432	major facilitator superfamily domain containing 2A [Source:HGNC Symbol;Acc:HGNC:25897]	84879	Q71RE4	Q71RE4
0.118978	3.90627	2.01337	0.0577619	0.457467	ENSG00000070950.9	FALSE	ENSG00000070950	3	RAD18	protein_coding	5886	RAD18, E3 ubiquitin protein ligase [Source:HGNC Symbol;Acc:HGNC:18278]	56852	Q9NS91	Q9NS91
-0.914046	1.01637	-2.01316	0.0577852	0.457467	ENSG00000151632.17	FALSE	ENSG00000151632	10	AKR1C2	protein_coding	3756	aldo-keto reductase family 1 member C2 [Source:HGNC Symbol;Acc:HGNC:385]	1646	P52895	P52895
-0.0888253	5.99394	-2.01307	0.057796	0.457467	ENSG00000101384.12	FALSE	ENSG00000101384	20	JAG1	protein_coding	5940	jagged 1 [Source:HGNC Symbol;Acc:HGNC:6188]	182	P78504	P78504
0.128259	3.99009	2.01081	0.0580522	0.459217	ENSG00000173141.4	FALSE	ENSG00000173141	13	MRPL57	protein_coding	2246	mitochondrial ribosomal protein L57 [Source:HGNC Symbol;Acc:HGNC:14514]	78988	A0A024RDM4	A0A024RDM4
-0.274565	4.87873	-2.01027	0.0581148	0.459434	ENSG00000145050.16	FALSE	ENSG00000145050	3	MANF	protein_coding	1509	mesencephalic astrocyte derived neurotrophic factor [Source:HGNC Symbol;Acc:HGNC:15461]	7873	A8K878	A8K878
0.153577	4.7255	2.00975	0.0581742	0.459567	ENSG00000120253.13	FALSE	ENSG00000120253	6	NUP43	protein_coding	3874	nucleoporin 43 [Source:HGNC Symbol;Acc:HGNC:21182]	348995	Q8NFH3	Q8NFH3
-0.110733	5.98875	-2.0095	0.0582019	0.459567	ENSG00000155827.11	FALSE	ENSG00000155827	9	RNF20	protein_coding	3940	ring finger protein 20 [Source:HGNC Symbol;Acc:HGNC:10062]	56254	Q5VTR2	Q5VTR2
0.156549	5.44013	2.00885	0.0582765	0.459615	ENSG00000213463.4	FALSE	ENSG00000213463	14	SYNJ2BP	protein_coding	7015	synaptojanin 2 binding protein [Source:HGNC Symbol;Acc:HGNC:18955]	55333	A0A024R670	A0A024R670
-0.189903	5.03817	-2.00814	0.0583584	0.459615	ENSG00000136026.13	FALSE	ENSG00000136026	12	CKAP4	protein_coding	3093	cytoskeleton associated protein 4 [Source:HGNC Symbol;Acc:HGNC:16991]	10970	A0A024RBH2	A0A024RBH2
-0.199373	6.36644	-2.008	0.0583743	0.459615	ENSG00000072310.16	FALSE	ENSG00000072310	17	SREBF1	protein_coding	4653	sterol regulatory element binding transcription factor 1 [Source:HGNC Symbol;Acc:HGNC:11289]	6720	P36956	P36956
0.15532	4.81388	2.00784	0.0583924	0.459615	ENSG00000198393.7	FALSE	ENSG00000198393	12	ZNF26	protein_coding	17601	zinc finger protein 26 [Source:HGNC Symbol;Acc:HGNC:13053]	7574	F5H6R4	F5H6R4
0.155974	4.89956	2.00764	0.0584153	0.459615	ENSG00000101407.12	FALSE	ENSG00000101407	20	TTI1	protein_coding	3958	TELO2 interacting protein 1 [Source:HGNC Symbol;Acc:HGNC:29029]	9675	O43156	O43156
-0.121769	5.2169	-2.00686	0.0585047	0.459615	ENSG00000124784.8	FALSE	ENSG00000124784	6	RIOK1	protein_coding	2810	RIO kinase 1 [Source:HGNC Symbol;Acc:HGNC:18656]	83732	Q9BRS2	Q9BRS2
-0.124162	6.70512	-2.0066	0.0585345	0.459615	ENSG00000145901.15	FALSE	ENSG00000145901	5	TNIP1	protein_coding	2935	TNFAIP3 interacting protein 1 [Source:HGNC Symbol;Acc:HGNC:16903]	10318	A0A0A0MRZ4	A0A0A0MRZ4
0.19762	4.22371	2.00659	0.058536	0.459615	ENSG00000196876.15	FALSE	ENSG00000196876	12	SCN8A	protein_coding	11556	sodium voltage-gated channel alpha subunit 8 [Source:HGNC Symbol;Acc:HGNC:10596]	6334	Q9UQD0	Q9UQD0
0.156659	4.47913	2.00624	0.0585757	0.459615	ENSG00000166886.12	FALSE	ENSG00000166886	12	NAB2	protein_coding	2711	NGFI-A binding protein 2 [Source:HGNC Symbol;Acc:HGNC:7627]	4665	Q15742	Q15742
-0.790397	-0.00801848	-2.00614	0.0585872	0.459615	ENSG00000184154.14	FALSE	ENSG00000184154	11	LRTOMT	protein_coding	3604	leucine rich transmembrane and O-methyltransferase domain containing [Source:HGNC Symbol;Acc:HGNC:25033]	220074	Q96E66	Q96E66
0.106439	6.17654	2.00607	0.0585949	0.459615	ENSG00000159216.18	FALSE	ENSG00000159216	21	RUNX1	protein_coding	7274	runt related transcription factor 1 [Source:HGNC Symbol;Acc:HGNC:10471]	861	Q01196	Q01196
0.384144	1.41073	2.0039	0.058845	0.461266	ENSG00000137628.16	FALSE	ENSG00000137628	4	DDX60	protein_coding	6071	DExD/H-box helicase 60 [Source:HGNC Symbol;Acc:HGNC:25942]	55601	Q6B0F7	Q6B0F7
-0.23102	4.79012	-2.00321	0.0589254	0.461266	ENSG00000164258.11	FALSE	ENSG00000164258	5	NDUFS4	protein_coding	833	NADH:ubiquinone oxidoreductase subunit S4 [Source:HGNC Symbol;Acc:HGNC:7711]	4724	A0A0S2Z433	A0A0S2Z433
-0.193686	3.32017	-2.00315	0.0589323	0.461266	ENSG00000142185.16	FALSE	ENSG00000142185	21	TRPM2	protein_coding	6221	transient receptor potential cation channel subfamily M member 2 [Source:HGNC Symbol;Acc:HGNC:12339]	7226	B4DVI8	B4DVI8
-0.136028	5.64795	-2.00294	0.0589567	0.461266	ENSG00000006744.18	FALSE	ENSG00000006744	17	ELAC2	protein_coding	3738	elaC ribonuclease Z 2 [Source:HGNC Symbol;Acc:HGNC:14198]	60528	Q9BQ52	Q9BQ52
0.677401	-0.102801	2.00242	0.0590158	0.461266	ENSG00000123570.3	FALSE	ENSG00000123570	X	RAB9B	protein_coding	3748	RAB9B, member RAS oncogene family [Source:HGNC Symbol;Acc:HGNC:14090]	51209	Q9NP90	Q9NP90
0.142365	6.2616	2.00241	0.0590172	0.461266	ENSG00000114978.17	FALSE	ENSG00000114978	2	MOB1A	protein_coding	4885	MOB kinase activator 1A [Source:HGNC Symbol;Acc:HGNC:16015]	55233	Q9H8S9	Q9H8S9
0.127379	4.09807	2.00191	0.0590749	0.461371	ENSG00000163348.3	FALSE	ENSG00000163348	1	PYGO2	protein_coding	3146	pygopus family PHD finger 2 [Source:HGNC Symbol;Acc:HGNC:30257]	90780	Q5T170	Q5T170
-0.263141	2.78064	-2.00169	0.0591012	0.461371	ENSG00000175920.17	FALSE	ENSG00000175920	4	DOK7	protein_coding	2562	docking protein 7 [Source:HGNC Symbol;Acc:HGNC:26594]	285489	Q18PE1	Q18PE1
-0.677354	-1.03571	-2.00035	0.0592561	0.462304	ENSG00000007952.17	FALSE	ENSG00000007952	X	NOX1	protein_coding	2529	NADPH oxidase 1 [Source:HGNC Symbol;Acc:HGNC:7889]	27035	A6NGA6	A6NGA6
0.157721	4.90544	1.99992	0.0593061	0.462418	ENSG00000162783.10	FALSE	ENSG00000162783	1	IER5	protein_coding	4188	immediate early response 5 [Source:HGNC Symbol;Acc:HGNC:5393]	51278	Q5VY09	Q5VY09
-0.710391	-0.151518	-1.99863	0.059456	0.46331	ENSG00000179674.3	FALSE	ENSG00000179674	3	ARL14	protein_coding	1294	ADP ribosylation factor like GTPase 14 [Source:HGNC Symbol;Acc:HGNC:22974]	80117	Q8N4G2	Q8N4G2
-0.154166	4.83095	-1.99724	0.0596189	0.464232	ENSG00000118363.11	FALSE	ENSG00000118363	11	SPCS2	protein_coding	2711	signal peptidase complex subunit 2 [Source:HGNC Symbol;Acc:HGNC:28962]	9789	Q15005	Q15005
-0.109574	5.41517	-1.99689	0.0596591	0.464232	ENSG00000082068.8	FALSE	ENSG00000082068	5	WDR70	protein_coding	5716	WD repeat domain 70 [Source:HGNC Symbol;Acc:HGNC:25495]	55100	Q9NW82	Q9NW82
0.138105	4.79255	1.99662	0.0596913	0.464232	ENSG00000134444.14	FALSE	ENSG00000134444	18	RELCH	protein_coding	8585	RAB11 binding and LisH domain, coiled-coil and HEAT repeat containing [Source:HGNC Symbol;Acc:HGNC:29289]	57614	Q9P260	Q9P260
0.101188	5.73865	1.9962	0.0597396	0.464232	ENSG00000086102.18	FALSE	ENSG00000086102	9	NFX1	protein_coding	4604	nuclear transcription factor, X-box binding 1 [Source:HGNC Symbol;Acc:HGNC:7803]	4799	Q12986	Q12986
-0.15988	3.97757	-1.99585	0.0597808	0.464232	ENSG00000114745.13	FALSE	ENSG00000114745	3	GORASP1	protein_coding	3722	golgi reassembly stacking protein 1 [Source:HGNC Symbol;Acc:HGNC:16769]	64689	B3KPY8	B3KPY8
-0.213112	3.21374	-1.99579	0.0597875	0.464232	ENSG00000125652.7	FALSE	ENSG00000125652	19	ALKBH7	protein_coding	1332	alkB homolog 7 [Source:HGNC Symbol;Acc:HGNC:21306]	84266	Q9BT30	Q9BT30
-0.192884	3.81696	-1.99506	0.0598732	0.46461	ENSG00000130312.6	FALSE	ENSG00000130312	19	MRPL34	protein_coding	968	mitochondrial ribosomal protein L34 [Source:HGNC Symbol;Acc:HGNC:14488]	64981	A0A024R7J4	A0A024R7J4
-0.608408	3.07019	-1.99477	0.0599072	0.46461	ENSG00000092758.17	FALSE	ENSG00000092758	20	COL9A3	protein_coding	2497	collagen type IX alpha 3 chain [Source:HGNC Symbol;Acc:HGNC:2219]	1299	Q14050	Q14050
-0.250296	4.94232	-1.9933	0.0600803	0.464675	ENSG00000130038.9	FALSE	ENSG00000130038	12	CRACR2A	protein_coding	7554	calcium release activated channel regulator 2A [Source:HGNC Symbol;Acc:HGNC:28657]	84766	Q9BSW2	Q9BSW2
-0.14778	5.03929	-1.99327	0.0600832	0.464675	ENSG00000141526.16	FALSE	ENSG00000141526	17	SLC16A3	protein_coding	4830	solute carrier family 16 member 3 [Source:HGNC Symbol;Acc:HGNC:10924]	9123	A0A024R8U1	A0A024R8U1
-0.552021	-0.0223569	-1.99308	0.0601054	0.464675	ENSG00000108786.10	FALSE	ENSG00000108786	17	HSD17B1	protein_coding	4982	hydroxysteroid 17-beta dehydrogenase 1 [Source:HGNC Symbol;Acc:HGNC:5210]	3292	P14061	P14061
0.604493	0.236887	1.99287	0.0601308	0.464675	ENSG00000256043.2	FALSE	ENSG00000256043	4	CTSO	protein_coding	2954	cathepsin O [Source:HGNC Symbol;Acc:HGNC:2542]	1519	P43234	P43234
0.369709	1.5391	1.99282	0.0601366	0.464675	ENSG00000253276.2	FALSE	ENSG00000253276	7	CCDC71L	protein_coding	4232	coiled-coil domain containing 71 like [Source:HGNC Symbol;Acc:HGNC:26685]	168455	Q8N9Z2	Q8N9Z2
0.163624	5.64269	1.9926	0.0601627	0.464675	ENSG00000115084.13	FALSE	ENSG00000115084	2	SLC35F5	protein_coding	4412	solute carrier family 35 member F5 [Source:HGNC Symbol;Acc:HGNC:23617]	80255	B8ZZY4	B8ZZY4
-0.369933	3.50575	-1.99258	0.0601646	0.464675	ENSG00000277157.1	FALSE	ENSG00000277157	6	HIST1H4D	protein_coding	312	histone cluster 1 H4 family member d [Source:HGNC Symbol;Acc:HGNC:4782]	8360	B2R4R0	B2R4R0
-1.15556	6.12074	-1.99225	0.0602036	0.464702	ENSG00000198695.2	FALSE	ENSG00000198695	M	MT-ND6	protein_coding	525	mitochondrially encoded NADH:ubiquinone oxidoreductase core subunit 6 [Source:HGNC Symbol;Acc:HGNC:7462]	4541	P03923	P03923
-0.153752	6.83303	-1.99156	0.0602849	0.465055	ENSG00000109572.13	FALSE	ENSG00000109572	4	CLCN3	protein_coding	6692	chloride voltage-gated channel 3 [Source:HGNC Symbol;Acc:HGNC:2021]	1182	P51790	P51790
-0.473539	0.503219	-1.99092	0.0603599	0.465359	ENSG00000179111.8	FALSE	ENSG00000179111	17	HES7	protein_coding	1674	hes family bHLH transcription factor 7 [Source:HGNC Symbol;Acc:HGNC:15977]	84667	Q9BYE0	Q9BYE0
-0.162444	3.92502	-1.99027	0.0604371	0.465679	ENSG00000134508.12	FALSE	ENSG00000134508	18	CABLES1	protein_coding	5002	Cdk5 and Abl enzyme substrate 1 [Source:HGNC Symbol;Acc:HGNC:25097]	91768	A7K6Y5	A7K6Y5
-0.121117	6.08984	-1.98928	0.0605539	0.466196	ENSG00000136261.14	FALSE	ENSG00000136261	7	BZW2	protein_coding	2101	basic leucine zipper and W2 domains 2 [Source:HGNC Symbol;Acc:HGNC:18808]	28969	A0A024RA42	A0A024RA42
-0.169814	4.46344	-1.9891	0.0605755	0.466196	ENSG00000132256.18	FALSE	ENSG00000132256	11	TRIM5	protein_coding	3170	tripartite motif containing 5 [Source:HGNC Symbol;Acc:HGNC:16276]	85363	Q9C035	Q9C035
-0.192529	4.29176	-1.98791	0.060716	0.467002	ENSG00000099282.9	FALSE	ENSG00000099282	10	TSPAN15	protein_coding	1698	tetraspanin 15 [Source:HGNC Symbol;Acc:HGNC:23298]	23555	O95858	O95858
0.139642	4.67543	1.98719	0.0608022	0.467128	ENSG00000099219.13	FALSE	ENSG00000099219	9	ERMP1	protein_coding	5376	endoplasmic reticulum metallopeptidase 1 [Source:HGNC Symbol;Acc:HGNC:23703]	79956	Q6ZMD3	Q6ZMD3
-0.160744	5.17477	-1.987	0.0608243	0.467128	ENSG00000005156.11	FALSE	ENSG00000005156	17	LIG3	protein_coding	8400	DNA ligase 3 [Source:HGNC Symbol;Acc:HGNC:6600]	3980	P49916	P49916
0.700925	1.41229	1.98687	0.0608396	0.467128	ENSG00000119138.4	FALSE	ENSG00000119138	9	KLF9	protein_coding	5175	Kruppel like factor 9 [Source:HGNC Symbol;Acc:HGNC:1123]	687	A0A024R260	A0A024R260
-0.494471	-0.634415	-1.98642	0.0608941	0.467226	ENSG00000142173.14	FALSE	ENSG00000142173	21	COL6A2	protein_coding	3461	collagen type VI alpha 2 chain [Source:HGNC Symbol;Acc:HGNC:2212]	1292	P12110	P12110
-0.75127	1.6549	-1.98617	0.0609238	0.467226	ENSG00000130475.14	FALSE	ENSG00000130475	19	FCHO1	protein_coding	3214	FCH domain only 1 [Source:HGNC Symbol;Acc:HGNC:29002]	23149	A0A0C3SFZ9	A0A0C3SFZ9
0.167269	4.39478	1.98548	0.0610051	0.467574	ENSG00000196227.10	FALSE	ENSG00000196227	20	FAM217B	protein_coding	5152	family with sequence similarity 217 member B [Source:HGNC Symbol;Acc:HGNC:16170]	63939	Q9NTX9	Q9NTX9
-0.323818	2.2456	-1.9848	0.0610862	0.467922	ENSG00000181284.2	FALSE	ENSG00000181284	17	TMEM102	protein_coding	1973	transmembrane protein 102 [Source:HGNC Symbol;Acc:HGNC:26722]	284114	Q8N9M5	Q8N9M5
-0.661076	0.0695019	-1.98412	0.0611673	0.468264	ENSG00000186832.8	FALSE	ENSG00000186832	17	KRT16	protein_coding	1644	keratin 16 [Source:HGNC Symbol;Acc:HGNC:6423]	3868	P08779	P08779
-0.139636	5.27413	-1.98383	0.0612025	0.468264	ENSG00000186193.8	FALSE	ENSG00000186193	9	SAPCD2	protein_coding	3848	suppressor APC domain containing 2 [Source:HGNC Symbol;Acc:HGNC:28055]	89958	Q86UD0	Q86UD0
0.211774	2.0638	1.98287	0.0613177	0.468834	ENSG00000181754.6	FALSE	ENSG00000181754	1	AMIGO1	protein_coding	5088	adhesion molecule with Ig like domain 1 [Source:HGNC Symbol;Acc:HGNC:20824]	57463	Q86WK6	Q86WK6
-0.120586	5.06684	-1.98261	0.0613487	0.468834	ENSG00000103148.15	FALSE	ENSG00000103148	16	NPRL3	protein_coding	3203	NPR3 like, GATOR1 complex subunit [Source:HGNC Symbol;Acc:HGNC:14124]	8131	Q9BTE2	Q9BTE2
0.126043	5.2225	1.9819	0.0614332	0.468978	ENSG00000100099.20	FALSE	ENSG00000100099	22	HPS4	protein_coding	6136	HPS4, biogenesis of lysosomal organelles complex 3 subunit 2 [Source:HGNC Symbol;Acc:HGNC:15844]	89781	A8K2E6	A8K2E6
-0.136199	5.05992	-1.98185	0.0614394	0.468978	ENSG00000103653.16	FALSE	ENSG00000103653	15	CSK	protein_coding	2767	C-terminal Src kinase [Source:HGNC Symbol;Acc:HGNC:2444]	1445	A8K3B6	A8K3B6
0.144337	6.03164	1.98063	0.0615861	0.469519	ENSG00000101782.14	FALSE	ENSG00000101782	18	RIOK3	protein_coding	4038	RIO kinase 3 [Source:HGNC Symbol;Acc:HGNC:11451]	8780	B0YJ89	B0YJ89
0.188155	5.07431	1.98037	0.0616168	0.469519	ENSG00000144566.10	FALSE	ENSG00000144566	3	RAB5A	protein_coding	2536	RAB5A, member RAS oncogene family [Source:HGNC Symbol;Acc:HGNC:9783]	5868	P20339	P20339
-0.378038	1.92657	-1.97983	0.0616819	0.469519	ENSG00000198937.8	FALSE	ENSG00000198937	6	CCDC167	protein_coding	619	coiled-coil domain containing 167 [Source:HGNC Symbol;Acc:HGNC:21239]	154467	Q9P0B6	Q9P0B6
0.256324	3.10848	1.9797	0.0616983	0.469519	ENSG00000117650.12	FALSE	ENSG00000117650	1	NEK2	protein_coding	2131	NIMA related kinase 2 [Source:HGNC Symbol;Acc:HGNC:7745]	4751	F6U4U2	F6U4U2
0.155547	5.62818	1.97957	0.0617133	0.469519	ENSG00000055208.18	FALSE	ENSG00000055208	6	TAB2	protein_coding	4553	TGF-beta activated kinase 1 _MAP3K7_ binding protein 2 [Source:HGNC Symbol;Acc:HGNC:17075]	23118	Q9NYJ8	Q9NYJ8
-0.557367	-0.75424	-1.97947	0.0617259	0.469519	ENSG00000148677.6	FALSE	ENSG00000148677	10	ANKRD1	protein_coding	1979	ankyrin repeat domain 1 [Source:HGNC Symbol;Acc:HGNC:15819]	27063	Q15327	Q15327
-0.116182	5.75296	-1.97867	0.0618217	0.469568	ENSG00000163435.15	FALSE	ENSG00000163435	1	ELF3	protein_coding	4994	E74 like ETS transcription factor 3 [Source:HGNC Symbol;Acc:HGNC:3318]	1999	A0A024R974	A0A024R974
-0.128244	5.47436	-1.97808	0.0618929	0.469568	ENSG00000104218.14	FALSE	ENSG00000104218	8	CSPP1	protein_coding	4367	centrosome and spindle pole associated protein 1 [Source:HGNC Symbol;Acc:HGNC:26193]	79848	Q1MSJ5	Q1MSJ5
-0.782278	0.939399	-1.97805	0.0618971	0.469568	ENSG00000132329.10	FALSE	ENSG00000132329	2	RAMP1	protein_coding	910	receptor activity modifying protein 1 [Source:HGNC Symbol;Acc:HGNC:9843]	10267	E9PC20	E9PC20
-0.106155	6.9239	-1.978	0.0619024	0.469568	ENSG00000110917.7	FALSE	ENSG00000110917	12	MLEC	protein_coding	6626	malectin [Source:HGNC Symbol;Acc:HGNC:28973]	9761	F5GX14	F5GX14
0.858177	-0.854827	1.97792	0.061912	0.469568	ENSG00000203724.10	FALSE	ENSG00000203724	1	C1ORF53	protein_coding	588	chromosome 1 open reading frame 53 [Source:HGNC Symbol;Acc:HGNC:30003]	388722	Q5VUE5	Q5VUE5
-0.492867	2.69716	-1.97714	0.0620067	0.469901	ENSG00000089820.15	FALSE	ENSG00000089820	X	ARHGAP4	protein_coding	3372	Rho GTPase activating protein 4 [Source:HGNC Symbol;Acc:HGNC:674]	393	P98171	P98171
-0.317628	2.40742	-1.97674	0.0620555	0.469901	ENSG00000167565.12	FALSE	ENSG00000167565	19	SERTAD3	protein_coding	1734	SERTA domain containing 3 [Source:HGNC Symbol;Acc:HGNC:17931]	29946	A0A024R0N2	A0A024R0N2
0.661413	-0.777342	1.97667	0.0620638	0.469901	ENSG00000205111.8	FALSE	ENSG00000205111	2	CDKL4	protein_coding	1567	cyclin dependent kinase like 4 [Source:HGNC Symbol;Acc:HGNC:19287]	344387	Q5MAI5	Q5MAI5
0.133969	5.23836	1.97516	0.0622463	0.470899	ENSG00000088832.16	FALSE	ENSG00000088832	20	FKBP1A	protein_coding	1622	FK506 binding protein 1A [Source:HGNC Symbol;Acc:HGNC:3711]	2280	P62942	P62942
-0.106746	6.11478	-1.97427	0.0623552	0.470899	ENSG00000131558.14	FALSE	ENSG00000131558	7	EXOC4	protein_coding	4185	exocyst complex component 4 [Source:HGNC Symbol;Acc:HGNC:30389]	60412	Q6NX51	Q6NX51
-0.175606	4.21508	-1.97396	0.0623918	0.470899	ENSG00000104886.11	FALSE	ENSG00000104886	19	PLEKHJ1	protein_coding	2858	pleckstrin homology domain containing J1 [Source:HGNC Symbol;Acc:HGNC:18211]	55111	K7EIZ3	K7EIZ3
-0.351718	-0.480321	-1.97365	0.0624295	0.470899	ENSG00000014257.15	FALSE	ENSG00000014257	3	ACPP	protein_coding	3125	acid phosphatase, prostate [Source:HGNC Symbol;Acc:HGNC:125]	55	P15309	P15309
0.109625	8.11021	1.97365	0.06243	0.470899	ENSG00000133226.16	FALSE	ENSG00000133226	1	SRRM1	protein_coding	4011	serine and arginine repetitive matrix 1 [Source:HGNC Symbol;Acc:HGNC:16638]	10250	B7Z7U0	B7Z7U0
-0.10531	5.59429	-1.97358	0.0624387	0.470899	ENSG00000163930.9	FALSE	ENSG00000163930	3	BAP1	protein_coding	3937	BRCA1 associated protein 1 [Source:HGNC Symbol;Acc:HGNC:950]	8314	A0A024R305	A0A024R305
-0.161567	7.79379	-1.97324	0.0624793	0.470899	ENSG00000196498.13	FALSE	ENSG00000196498	12	NCOR2	protein_coding	8533	nuclear receptor corepressor 2 [Source:HGNC Symbol;Acc:HGNC:7673]	9612	C9JE98	C9JE98
-0.126624	10.6799	-1.97321	0.0624838	0.470899	ENSG00000137154.12	FALSE	ENSG00000137154	9	RPS6	protein_coding	1387	ribosomal protein S6 [Source:HGNC Symbol;Acc:HGNC:10429]	6194	A2A3R6	A2A3R6
-0.142069	6.82224	-1.97289	0.0625229	0.470922	ENSG00000134440.11	FALSE	ENSG00000134440	18	NARS	protein_coding	3099	asparaginyl-tRNA synthetase [Source:HGNC Symbol;Acc:HGNC:7643]	4677	O43776	O43776
-0.733218	-0.540092	-1.97212	0.062616	0.471352	ENSG00000164076.16	FALSE	ENSG00000164076	3	CAMKV	protein_coding	3314	CaM kinase like vesicle associated [Source:HGNC Symbol;Acc:HGNC:28788]	79012	A0A024R331	A0A024R331
0.116758	4.57646	1.97166	0.062673	0.471509	ENSG00000090470.14	FALSE	ENSG00000090470	15	PDCD7	protein_coding	2851	programmed cell death 7 [Source:HGNC Symbol;Acc:HGNC:8767]	10081	Q6IEG3	Q6IEG3
0.288384	4.54576	1.97064	0.062797	0.471934	ENSG00000240972.1	FALSE	ENSG00000240972	22	MIF	protein_coding	939	macrophage migration inhibitory factor [Source:HGNC Symbol;Acc:HGNC:7097]	4282	I4AY87	I4AY87
0.368683	0.736175	1.9706	0.0628017	0.471934	ENSG00000163082.9	FALSE	ENSG00000163082	2	SGPP2	protein_coding	3336	sphingosine-1-phosphate phosphatase 2 [Source:HGNC Symbol;Acc:HGNC:19953]	130367	Q8IWX5	Q8IWX5
0.247492	2.76245	1.96987	0.0628911	0.472334	ENSG00000133424.20	FALSE	ENSG00000133424	22	LARGE1	protein_coding	5368	LARGE xylosyl- and glucuronyltransferase 1 [Source:HGNC Symbol;Acc:HGNC:6511]	9215	O95461	O95461
0.244582	3.37297	1.96904	0.0629936	0.472759	ENSG00000121989.14	FALSE	ENSG00000121989	2	ACVR2A	protein_coding	5728	activin A receptor type 2A [Source:HGNC Symbol;Acc:HGNC:173]	92	P27037	P27037
0.121639	5.31877	1.96882	0.06302	0.472759	ENSG00000158636.16	FALSE	ENSG00000158636	11	EMSY	protein_coding	6848	EMSY, BRCA2 interacting transcriptional repressor [Source:HGNC Symbol;Acc:HGNC:18071]	56946	Q7Z589	Q7Z589
0.453048	1.5697	1.96851	0.0630583	0.472774	ENSG00000285589.1	FALSE	ENSG00000285589	19	AC010422.8	protein_coding	5025	novel transcript	#N/A	#N/A	#N/A
-0.308144	3.44779	-1.96814	0.0631035	0.472842	ENSG00000157657.14	FALSE	ENSG00000157657	9	ZNF618	protein_coding	9289	zinc finger protein 618 [Source:HGNC Symbol;Acc:HGNC:29416]	114991	Q5T7W0	Q5T7W0
-0.286154	2.49707	-1.96694	0.0632512	0.473587	ENSG00000275714.1	FALSE	ENSG00000275714	6	HIST1H3A	protein_coding	411	histone cluster 1 H3 family member a [Source:HGNC Symbol;Acc:HGNC:4766]	8350	P68431	P68431
-0.899836	-1.13572	-1.96674	0.0632754	0.473587	ENSG00000171759.9	FALSE	ENSG00000171759	12	PAH	protein_coding	4122	phenylalanine hydroxylase [Source:HGNC Symbol;Acc:HGNC:8582]	5053	A0A024RBG4	A0A024RBG4
0.117026	5.61365	1.96574	0.0633994	0.474193	ENSG00000090989.17	FALSE	ENSG00000090989	4	EXOC1	protein_coding	3551	exocyst complex component 1 [Source:HGNC Symbol;Acc:HGNC:30380]	55763	A0A024RDA9	A0A024RDA9
-0.246503	3.08647	-1.9655	0.063429	0.474193	ENSG00000174886.12	FALSE	ENSG00000174886	19	NDUFA11	protein_coding	2406	NADH:ubiquinone oxidoreductase subunit A11 [Source:HGNC Symbol;Acc:HGNC:20371]	126328	Q86Y39	Q86Y39
0.23282	3.01125	1.96449	0.0635526	0.474846	ENSG00000127452.8	FALSE	ENSG00000127452	19	FBXL12	protein_coding	1920	F-box and leucine rich repeat protein 12 [Source:HGNC Symbol;Acc:HGNC:13611]	54850	Q9NXK8	Q9NXK8
0.187625	4.43988	1.9641	0.0636016	0.47494	ENSG00000173588.14	FALSE	ENSG00000173588	12	CEP83	protein_coding	3773	centrosomal protein 83 [Source:HGNC Symbol;Acc:HGNC:17966]	51134	J3KNW7	J3KNW7
0.146967	5.28131	1.96376	0.063644	0.474986	ENSG00000111581.9	FALSE	ENSG00000111581	12	NUP107	protein_coding	6457	nucleoporin 107 [Source:HGNC Symbol;Acc:HGNC:29914]	57122	P57740	P57740
0.119104	6.50684	1.96343	0.0636839	0.475012	ENSG00000198586.13	FALSE	ENSG00000198586	2	TLK1	protein_coding	5726	tousled like kinase 1 [Source:HGNC Symbol;Acc:HGNC:11841]	9874	Q9UKI8	Q9UKI8
-0.650646	0.360811	-1.9623	0.063825	0.475556	ENSG00000146205.13	FALSE	ENSG00000146205	2	ANO7	protein_coding	4128	anoctamin 7 [Source:HGNC Symbol;Acc:HGNC:31677]	50636	Q6IWH7	Q6IWH7
-0.211311	3.39691	-1.96226	0.0638296	0.475556	ENSG00000197021.8	FALSE	ENSG00000197021	X	CXORF40B	protein_coding	1653	chromosome X open reading frame 40B [Source:HGNC Symbol;Acc:HGNC:17402]	541578	Q96DE9	Q96DE9
-0.116736	9.0865	-1.96118	0.0639629	0.476277	ENSG00000117394.21	FALSE	ENSG00000117394	1	SLC2A1	protein_coding	3670	solute carrier family 2 member 1 [Source:HGNC Symbol;Acc:HGNC:11005]	6513	P11166	P11166
-0.436469	1.50453	-1.96049	0.0640487	0.476645	ENSG00000165507.8	FALSE	ENSG00000165507	10	DEPP1	protein_coding	2120	DEPP1, autophagy regulator [Source:HGNC Symbol;Acc:HGNC:23355]	11067	Q9NTK1	Q9NTK1
0.133891	5.66132	1.95991	0.0641215	0.476915	ENSG00000032219.18	FALSE	ENSG00000032219	14	ARID4A	protein_coding	5891	AT-rich interaction domain 4A [Source:HGNC Symbol;Acc:HGNC:9885]	5926	A0A024R657	A0A024R657
-0.460306	1.41519	-1.95952	0.0641705	0.476932	ENSG00000189337.16	FALSE	ENSG00000189337	1	KAZN	protein_coding	6874	kazrin, periplakin interacting protein [Source:HGNC Symbol;Acc:HGNC:29173]	23254	Q674X7	Q674X7
0.145311	3.77763	1.95931	0.0641968	0.476932	ENSG00000013563.13	FALSE	ENSG00000013563	X	DNASE1L1	protein_coding	3008	deoxyribonuclease 1 like 1 [Source:HGNC Symbol;Acc:HGNC:2957]	1774	P49184	P49184
0.12651	6.75409	1.95861	0.0642836	0.477306	ENSG00000196586.13	FALSE	ENSG00000196586	6	MYO6	protein_coding	8692	myosin VI [Source:HGNC Symbol;Acc:HGNC:7605]	4646	Q9UM54	Q9UM54
0.126715	6.62436	1.95724	0.0644554	0.478309	ENSG00000180370.10	FALSE	ENSG00000180370	3	PAK2	protein_coding	6139	p21 _RAC1_ activated kinase 2 [Source:HGNC Symbol;Acc:HGNC:8591]	5062	A8K5M4	A8K5M4
-0.165693	4.02066	-1.95672	0.0645203	0.47852	ENSG00000070540.12	FALSE	ENSG00000070540	17	WIPI1	protein_coding	1886	WD repeat domain, phosphoinositide interacting 1 [Source:HGNC Symbol;Acc:HGNC:25471]	55062	B4DX63	B4DX63
-0.122057	5.37844	-1.95619	0.064586	0.478735	ENSG00000068120.14	FALSE	ENSG00000068120	17	COASY	protein_coding	2458	Coenzyme A synthase [Source:HGNC Symbol;Acc:HGNC:29932]	80347	Q13057	Q13057
-0.173207	4.66087	-1.95531	0.0646972	0.478875	ENSG00000105135.15	FALSE	ENSG00000105135	19	ILVBL	protein_coding	4248	ilvB acetolactate synthase like [Source:HGNC Symbol;Acc:HGNC:6041]	10994	A1L0T0	A1L0T0
-0.189485	5.67837	-1.9553	0.0646981	0.478875	ENSG00000133216.16	FALSE	ENSG00000133216	1	EPHB2	protein_coding	10816	EPH receptor B2 [Source:HGNC Symbol;Acc:HGNC:3393]	2048	B4DSE0	B4DSE0
-0.923047	-0.0241098	-1.95508	0.0647253	0.478875	ENSG00000139269.2	FALSE	ENSG00000139269	12	INHBE	protein_coding	2429	inhibin subunit beta E [Source:HGNC Symbol;Acc:HGNC:24029]	83729	P58166	P58166
0.151584	6.31276	1.95487	0.0647515	0.478875	ENSG00000077044.10	FALSE	ENSG00000077044	2	DGKD	protein_coding	6297	diacylglycerol kinase delta [Source:HGNC Symbol;Acc:HGNC:2851]	8527	A0A024R495	A0A024R495
0.702946	-1.36756	1.9537	0.0648991	0.479194	ENSG00000162511.7	FALSE	ENSG00000162511	1	LAPTM5	protein_coding	2223	lysosomal protein transmembrane 5 [Source:HGNC Symbol;Acc:HGNC:29612]	7805	Q13571	Q13571
0.116295	5.98455	1.95366	0.0649038	0.479194	ENSG00000105699.16	FALSE	ENSG00000105699	19	LSR	protein_coding	2480	lipolysis stimulated lipoprotein receptor [Source:HGNC Symbol;Acc:HGNC:29572]	51599	Q86X29	Q86X29
0.185225	4.34554	1.95311	0.0649735	0.479194	ENSG00000146776.14	FALSE	ENSG00000146776	7	ATXN7L1	protein_coding	5417	ataxin 7 like 1 [Source:HGNC Symbol;Acc:HGNC:22210]	222255	Q9BTQ8	Q9BTQ8
0.131654	4.63885	1.95281	0.0650108	0.479194	ENSG00000113657.12	FALSE	ENSG00000113657	5	DPYSL3	protein_coding	5476	dihydropyrimidinase like 3 [Source:HGNC Symbol;Acc:HGNC:3015]	1809	A0A140VK07	A0A140VK07
0.236356	2.75385	1.95263	0.0650336	0.479194	ENSG00000157601.13	FALSE	ENSG00000157601	21	MX1	protein_coding	3470	MX dynamin like GTPase 1 [Source:HGNC Symbol;Acc:HGNC:7532]	4599	P20591	P20591
0.105174	7.37043	1.95239	0.0650646	0.479194	ENSG00000135720.12	FALSE	ENSG00000135720	16	DYNC1LI2	protein_coding	4515	dynein cytoplasmic 1 light intermediate chain 2 [Source:HGNC Symbol;Acc:HGNC:2966]	1783	O43237	O43237
0.187928	4.2242	1.95214	0.0650963	0.479194	ENSG00000155744.9	FALSE	ENSG00000155744	2	FAM126B	protein_coding	9333	family with sequence similarity 126 member B [Source:HGNC Symbol;Acc:HGNC:28593]	285172	Q8IXS8	Q8IXS8
-0.670262	1.01728	-1.95194	0.0651207	0.479194	ENSG00000073712.14	FALSE	ENSG00000073712	14	FERMT2	protein_coding	6001	fermitin family member 2 [Source:HGNC Symbol;Acc:HGNC:15767]	10979	Q96AC1	Q96AC1
0.636969	0.34156	1.95168	0.0651541	0.479194	ENSG00000164849.9	FALSE	ENSG00000164849	7	GPR146	protein_coding	1969	G protein-coupled receptor 146 [Source:HGNC Symbol;Acc:HGNC:21718]	115330	A4D2Q3	A4D2Q3
0.175066	4.08554	1.95086	0.0652573	0.479194	ENSG00000075391.16	FALSE	ENSG00000075391	1	RASAL2	protein_coding	14453	RAS protein activator like 2 [Source:HGNC Symbol;Acc:HGNC:9874]	9462	A8K2P3	A8K2P3
-0.23096	3.126	-1.95081	0.0652642	0.479194	ENSG00000139291.13	FALSE	ENSG00000139291	12	TMEM19	protein_coding	5656	transmembrane protein 19 [Source:HGNC Symbol;Acc:HGNC:25605]	55266	A0A024RBA1	A0A024RBA1
-0.20681	2.57168	-1.95054	0.0652979	0.479194	ENSG00000186666.5	FALSE	ENSG00000186666	12	BCDIN3D	protein_coding	3253	BCDIN3 domain containing RNA methyltransferase [Source:HGNC Symbol;Acc:HGNC:27050]	144233	Q7Z5W3	Q7Z5W3
-0.758413	-0.965883	-1.95028	0.0653313	0.479194	ENSG00000151338.18	FALSE	ENSG00000151338	14	MIPOL1	protein_coding	7434	mirror-image polydactyly 1 [Source:HGNC Symbol;Acc:HGNC:21460]	145282	A8K735	A8K735
0.169027	4.83895	1.95023	0.0653369	0.479194	ENSG00000141699.10	FALSE	ENSG00000141699	17	RETREG3	protein_coding	4149	reticulophagy regulator family member 3 [Source:HGNC Symbol;Acc:HGNC:27258]	162427	Q86VR2	Q86VR2
-0.180943	3.45328	-1.95017	0.0653447	0.479194	ENSG00000100056.11	FALSE	ENSG00000100056	22	ESS2	protein_coding	5392	ess-2 splicing factor homolog [Source:HGNC Symbol;Acc:HGNC:16817]	8220	Q96DF8	Q96DF8
-0.851936	-0.457999	-1.94952	0.0654274	0.479532	ENSG00000166035.10	FALSE	ENSG00000166035	15	LIPC	protein_coding	2968	lipase C, hepatic type [Source:HGNC Symbol;Acc:HGNC:6619]	3990	A6H8L5	A6H8L5
0.374406	1.74756	1.94914	0.0654761	0.47962	ENSG00000166896.8	FALSE	ENSG00000166896	12	ATP23	protein_coding	2887	ATP23 metallopeptidase and ATP synthase assembly factor homolog [Source:HGNC Symbol;Acc:HGNC:29452]	91419	Q9Y6H3	Q9Y6H3
-0.104056	5.3159	-1.94779	0.0656473	0.47981	ENSG00000100364.18	FALSE	ENSG00000100364	22	KIAA0930	protein_coding	8119	KIAA0930 [Source:HGNC Symbol;Acc:HGNC:1314]	23313	Q6ICG6	Q6ICG6
-0.127451	5.62634	-1.94765	0.0656645	0.47981	ENSG00000102898.11	FALSE	ENSG00000102898	16	NUTF2	protein_coding	2608	nuclear transport factor 2 [Source:HGNC Symbol;Acc:HGNC:13722]	10204	A0A024R6Y2	A0A024R6Y2
-0.172606	3.74928	-1.94678	0.065776	0.47981	ENSG00000169976.6	FALSE	ENSG00000169976	6	SF3B5	protein_coding	693	splicing factor 3b subunit 5 [Source:HGNC Symbol;Acc:HGNC:21083]	83443	Q9BWJ5	Q9BWJ5
0.689084	-1.45782	1.94666	0.0657907	0.47981	ENSG00000204531.17	FALSE	ENSG00000204531	6	POU5F1	protein_coding	2276	POU class 5 homeobox 1 [Source:HGNC Symbol;Acc:HGNC:9221]	5460	M1S623	M1S623
-0.208929	3.61845	-1.94662	0.0657958	0.47981	ENSG00000185252.18	FALSE	ENSG00000185252	22	ZNF74	protein_coding	3879	zinc finger protein 74 [Source:HGNC Symbol;Acc:HGNC:13144]	7625	Q16587	Q16587
-0.206042	4.01014	-1.94655	0.0658055	0.47981	ENSG00000072506.12	FALSE	ENSG00000072506	X	HSD17B10	protein_coding	960	hydroxysteroid 17-beta dehydrogenase 10 [Source:HGNC Symbol;Acc:HGNC:4800]	3028	Q99714	Q99714
-0.136115	7.72021	-1.94618	0.0658517	0.47981	ENSG00000118898.15	FALSE	ENSG00000118898	16	PPL	protein_coding	6238	periplakin [Source:HGNC Symbol;Acc:HGNC:9273]	5493	O60437	O60437
-0.993375	-1.60882	-1.94596	0.0658798	0.47981	ENSG00000151322.18	FALSE	ENSG00000151322	14	NPAS3	protein_coding	5847	neuronal PAS domain protein 3 [Source:HGNC Symbol;Acc:HGNC:19311]	64067	Q8IXF0	Q8IXF0
-0.752903	-0.669479	-1.94567	0.0659179	0.47981	ENSG00000144451.18	FALSE	ENSG00000144451	2	SPAG16	protein_coding	4751	sperm associated antigen 16 [Source:HGNC Symbol;Acc:HGNC:23225]	79582	Q4G1A2	Q4G1A2
0.163675	5.8357	1.94566	0.0659189	0.47981	ENSG00000137831.14	FALSE	ENSG00000137831	15	UACA	protein_coding	6939	uveal autoantigen with coiled-coil domains and ankyrin repeats [Source:HGNC Symbol;Acc:HGNC:15947]	55075	Q9BZF9	Q9BZF9
0.248045	3.97478	1.94535	0.0659587	0.47981	ENSG00000175164.14	FALSE	ENSG00000175164	9	ABO	protein_coding	6359	ABO, alpha 1-3-N-acetylgalactosaminyltransferase and alpha 1-3-galactosyltransferase [Source:HGNC Symbol;Acc:HGNC:79]	28	A0A089QDC1	A0A089QDC1
0.27983	3.77882	1.9452	0.0659771	0.47981	ENSG00000204899.5	FALSE	ENSG00000204899	13	MZT1	protein_coding	2299	mitotic spindle organizing protein 1 [Source:HGNC Symbol;Acc:HGNC:33830]	440145	Q08AG7	Q08AG7
-0.643709	-0.580972	-1.94497	0.0660069	0.47981	ENSG00000216490.3	FALSE	ENSG00000216490	19	IFI30	protein_coding	2116	IFI30, lysosomal thiol reductase [Source:HGNC Symbol;Acc:HGNC:5398]	10437	A0A024R7N7	A0A024R7N7
0.170865	6.53653	1.9446	0.0660547	0.47981	ENSG00000114120.12	FALSE	ENSG00000114120	3	SLC25A36	protein_coding	5809	solute carrier family 25 member 36 [Source:HGNC Symbol;Acc:HGNC:25554]	55186	Q96CQ1	Q96CQ1
-0.198724	4.72303	-1.94442	0.0660777	0.47981	ENSG00000176092.15	FALSE	ENSG00000176092	1	CRYBG2	protein_coding	6259	crystallin beta-gamma domain containing 2 [Source:HGNC Symbol;Acc:HGNC:17295]	55057	Q8N1P7	Q8N1P7
-0.526161	0.190438	-1.94432	0.0660895	0.47981	ENSG00000105737.9	FALSE	ENSG00000105737	19	GRIK5	protein_coding	3493	glutamate ionotropic receptor kainate type subunit 5 [Source:HGNC Symbol;Acc:HGNC:4583]	2901	Q16478	Q16478
-0.308377	3.88193	-1.94358	0.066185	0.480236	ENSG00000099284.13	FALSE	ENSG00000099284	10	H2AFY2	protein_coding	1980	H2A histone family member Y2 [Source:HGNC Symbol;Acc:HGNC:14453]	55506	A0A024QZP6	A0A024QZP6
-0.262148	3.06592	-1.94301	0.0662582	0.480484	ENSG00000236699.8	FALSE	ENSG00000236699	4	ARHGEF38	protein_coding	5454	Rho guanine nucleotide exchange factor 38 [Source:HGNC Symbol;Acc:HGNC:25968]	54848	Q9NXL2	Q9NXL2
0.214164	3.67858	1.94274	0.0662926	0.480484	ENSG00000162627.16	FALSE	ENSG00000162627	1	SNX7	protein_coding	1734	sorting nexin 7 [Source:HGNC Symbol;Acc:HGNC:14971]	51375	Q9UNH6	Q9UNH6
0.594449	0.116667	1.94139	0.0664653	0.481468	ENSG00000064195.7	FALSE	ENSG00000064195	17	DLX3	protein_coding	2602	distal-less homeobox 3 [Source:HGNC Symbol;Acc:HGNC:2916]	1747	O60479	O60479
0.210769	3.09948	1.94099	0.0665178	0.481581	ENSG00000113838.12	FALSE	ENSG00000113838	3	TBCCD1	protein_coding	3058	TBCC domain containing 1 [Source:HGNC Symbol;Acc:HGNC:25546]	55171	Q9NVR7	Q9NVR7
0.132563	6.32138	1.94026	0.0666112	0.481761	ENSG00000136536.14	FALSE	ENSG00000136536	2	MARCH7	protein_coding	5922	membrane associated ring-CH-type finger 7 [Source:HGNC Symbol;Acc:HGNC:17393]	64844	B7ZAR7	B7ZAR7
-0.231246	2.51228	-1.94022	0.0666164	0.481761	ENSG00000183978.7	FALSE	ENSG00000183978	17	COA3	protein_coding	1374	cytochrome c oxidase assembly factor 3 [Source:HGNC Symbol;Acc:HGNC:24990]	28958	A0A024R1X4	A0A024R1X4
0.266732	2.51844	1.93987	0.0666616	0.481822	ENSG00000124279.11	FALSE	ENSG00000124279	5	FASTKD3	protein_coding	2402	FAST kinase domains 3 [Source:HGNC Symbol;Acc:HGNC:28758]	79072	Q14CZ7	Q14CZ7
-0.085599	10.0887	-1.93825	0.0668712	0.482302	ENSG00000075624.14	FALSE	ENSG00000075624	7	ACTB	protein_coding	2245	actin beta [Source:HGNC Symbol;Acc:HGNC:132]	60	P60709	P60709
-0.249732	3.33783	-1.93821	0.066876	0.482302	ENSG00000109063.14	FALSE	ENSG00000109063	17	MYH3	protein_coding	6037	myosin heavy chain 3 [Source:HGNC Symbol;Acc:HGNC:7573]	4621	P11055	P11055
0.174066	6.60607	1.9376	0.0669553	0.482302	ENSG00000101745.16	FALSE	ENSG00000101745	18	ANKRD12	protein_coding	11288	ankyrin repeat domain 12 [Source:HGNC Symbol;Acc:HGNC:29135]	23253	Q6UB98	Q6UB98
-0.412025	1.4993	-1.93742	0.0669774	0.482302	ENSG00000143365.17	FALSE	ENSG00000143365	1	RORC	protein_coding	4141	RAR related orphan receptor C [Source:HGNC Symbol;Acc:HGNC:10260]	6097	F1D8P6	F1D8P6
0.14048	3.80895	1.93716	0.0670118	0.482302	ENSG00000162772.16	FALSE	ENSG00000162772	1	ATF3	protein_coding	2103	activating transcription factor 3 [Source:HGNC Symbol;Acc:HGNC:785]	467	P18847	P18847
0.198494	3.62643	1.93689	0.0670464	0.482302	ENSG00000125962.14	FALSE	ENSG00000125962	X	ARMCX5	protein_coding	4640	armadillo repeat containing X-linked 5 [Source:HGNC Symbol;Acc:HGNC:25772]	64860	Q6P1M9	Q6P1M9
-0.129979	3.59659	-1.93657	0.0670879	0.482302	ENSG00000182208.13	FALSE	ENSG00000182208	11	MOB2	protein_coding	3174	MOB kinase activator 2 [Source:HGNC Symbol;Acc:HGNC:24904]	81532	Q70IA6	Q70IA6
-0.442337	1.8367	-1.93653	0.0670937	0.482302	ENSG00000166866.12	FALSE	ENSG00000166866	12	MYO1A	protein_coding	3658	myosin IA [Source:HGNC Symbol;Acc:HGNC:7595]	4640	B2R643	B2R643
0.1846	4.31238	1.9364	0.0671102	0.482302	ENSG00000180228.12	FALSE	ENSG00000180228	2	PRKRA	protein_coding	1851	protein activator of interferon induced protein kinase EIF2AK2 [Source:HGNC Symbol;Acc:HGNC:9438]	8575	O75569	O75569
-0.189294	4.68679	-1.93623	0.0671324	0.482302	ENSG00000169020.9	FALSE	ENSG00000169020	4	ATP5ME	protein_coding	496	ATP synthase membrane subunit e [Source:HGNC Symbol;Acc:HGNC:846]	521	P56385	P56385
0.0952998	5.31756	1.93592	0.0671724	0.482302	ENSG00000140718.20	FALSE	ENSG00000140718	16	FTO	protein_coding	11766	FTO, alpha-ketoglutarate dependent dioxygenase [Source:HGNC Symbol;Acc:HGNC:24678]	79068	B3KU60	B3KU60
0.213353	4.33231	1.93487	0.0673087	0.482302	ENSG00000128791.11	FALSE	ENSG00000128791	18	TWSG1	protein_coding	3756	twisted gastrulation BMP signaling modulator 1 [Source:HGNC Symbol;Acc:HGNC:12429]	57045	Q9GZX9	Q9GZX9
-0.467276	-0.357218	-1.93459	0.0673454	0.482302	ENSG00000115590.13	FALSE	ENSG00000115590	2	IL1R2	protein_coding	1578	interleukin 1 receptor type 2 [Source:HGNC Symbol;Acc:HGNC:5994]	7850	P27930	P27930
-0.178621	5.91058	-1.9345	0.0673568	0.482302	ENSG00000095066.11	FALSE	ENSG00000095066	19	HOOK2	protein_coding	2603	hook microtubule tethering protein 2 [Source:HGNC Symbol;Acc:HGNC:19885]	29911	Q96ED9	Q96ED9
0.127863	4.34507	1.93445	0.0673631	0.482302	ENSG00000164070.11	FALSE	ENSG00000164070	4	HSPA4L	protein_coding	10790	heat shock protein family A _Hsp70_ member 4 like [Source:HGNC Symbol;Acc:HGNC:17041]	22824	B4DZR0	B4DZR0
0.166292	5.3481	1.9344	0.0673696	0.482302	ENSG00000185246.17	FALSE	ENSG00000185246	14	PRPF39	protein_coding	3507	pre-mRNA processing factor 39 [Source:HGNC Symbol;Acc:HGNC:20314]	55015	Q86UA1	Q86UA1
-0.100735	5.31731	-1.9343	0.0673837	0.482302	ENSG00000187147.17	FALSE	ENSG00000187147	1	RNF220	protein_coding	3835	ring finger protein 220 [Source:HGNC Symbol;Acc:HGNC:25552]	55182	Q5VTB9	Q5VTB9
-0.171232	3.87805	-1.93423	0.0673923	0.482302	ENSG00000171953.15	FALSE	ENSG00000171953	17	ATPAF2	protein_coding	1737	ATP synthase mitochondrial F1 complex assembly factor 2 [Source:HGNC Symbol;Acc:HGNC:18802]	91647	Q8N5M1	Q8N5M1
0.194726	3.40188	1.93341	0.0674994	0.482305	ENSG00000151552.11	FALSE	ENSG00000151552	4	QDPR	protein_coding	1648	quinoid dihydropteridine reductase [Source:HGNC Symbol;Acc:HGNC:9752]	5860	A0A140VKA9	A0A140VKA9
-0.134668	5.30849	-1.93332	0.0675114	0.482305	ENSG00000137699.16	FALSE	ENSG00000137699	11	TRIM29	protein_coding	3328	tripartite motif containing 29 [Source:HGNC Symbol;Acc:HGNC:17274]	23650	B7Z5V5	B7Z5V5
-0.219304	3.86027	-1.93314	0.0675339	0.482305	ENSG00000177542.10	FALSE	ENSG00000177542	11	SLC25A22	protein_coding	2796	solute carrier family 25 member 22 [Source:HGNC Symbol;Acc:HGNC:19954]	79751	Q9H936	Q9H936
-0.454206	2.04081	-1.93309	0.0675404	0.482305	ENSG00000135960.9	FALSE	ENSG00000135960	2	EDAR	protein_coding	4323	ectodysplasin A receptor [Source:HGNC Symbol;Acc:HGNC:2895]	10913	Q9UNE0	Q9UNE0
0.167541	3.40318	1.93219	0.0676588	0.482524	ENSG00000042317.16	FALSE	ENSG00000042317	14	SPATA7	protein_coding	3610	spermatogenesis associated 7 [Source:HGNC Symbol;Acc:HGNC:20423]	55812	Q9P0W8	Q9P0W8
-0.565441	1.14157	-1.93175	0.0677155	0.482524	ENSG00000158806.13	FALSE	ENSG00000158806	8	NPM2	protein_coding	1874	nucleophosmin/nucleoplasmin 2 [Source:HGNC Symbol;Acc:HGNC:7930]	10361	Q86SE8	Q86SE8
-0.207363	3.94567	-1.93173	0.0677178	0.482524	ENSG00000138002.14	FALSE	ENSG00000138002	2	IFT172	protein_coding	5565	intraflagellar transport 172 [Source:HGNC Symbol;Acc:HGNC:30391]	26160	Q9UG01	Q9UG01
-0.35821	3.61453	-1.93095	0.0678211	0.482524	ENSG00000160867.14	FALSE	ENSG00000160867	5	FGFR4	protein_coding	3122	fibroblast growth factor receptor 4 [Source:HGNC Symbol;Acc:HGNC:3691]	2264	B4DVP5	B4DVP5
0.170414	4.60461	1.9308	0.0678405	0.482524	ENSG00000128708.12	FALSE	ENSG00000128708	2	HAT1	protein_coding	3845	histone acetyltransferase 1 [Source:HGNC Symbol;Acc:HGNC:4821]	8520	O14929	O14929
0.147676	6.04054	1.93076	0.0678458	0.482524	ENSG00000065243.19	FALSE	ENSG00000065243	1	PKN2	protein_coding	6121	protein kinase N2 [Source:HGNC Symbol;Acc:HGNC:9406]	5586	Q16513	Q16513
-0.11126	7.10536	-1.93038	0.0678955	0.482524	ENSG00000163931.15	FALSE	ENSG00000163931	3	TKT	protein_coding	7286	transketolase [Source:HGNC Symbol;Acc:HGNC:11834]	7086	P29401	P29401
0.18783	6.33268	1.92977	0.0679754	0.482524	ENSG00000166710.18	FALSE	ENSG00000166710	15	B2M	protein_coding	2403	beta-2-microglobulin [Source:HGNC Symbol;Acc:HGNC:914]	567	P61769	P61769
0.244799	2.41783	1.92976	0.0679762	0.482524	ENSG00000105520.10	FALSE	ENSG00000105520	19	PLPPR2	protein_coding	2727	phospholipid phosphatase related 2 [Source:HGNC Symbol;Acc:HGNC:29566]	64748	Q96GM1	Q96GM1
-0.0903775	5.75865	-1.92954	0.0680049	0.482524	ENSG00000140455.16	FALSE	ENSG00000140455	15	USP3	protein_coding	5499	ubiquitin specific peptidase 3 [Source:HGNC Symbol;Acc:HGNC:12626]	9960	Q9Y6I4	Q9Y6I4
0.215174	3.6079	1.92934	0.0680313	0.482524	ENSG00000137343.17	FALSE	ENSG00000137343	6	ATAT1	protein_coding	2646	alpha tubulin acetyltransferase 1 [Source:HGNC Symbol;Acc:HGNC:21186]	79969	A0A1U9X797	A0A1U9X797
-0.145054	4.76176	-1.92831	0.0681675	0.482524	ENSG00000135926.14	FALSE	ENSG00000135926	2	TMBIM1	protein_coding	2936	transmembrane BAX inhibitor motif containing 1 [Source:HGNC Symbol;Acc:HGNC:23410]	64114	A0A024R472	A0A024R472
0.110146	7.92083	1.92805	0.0682017	0.482524	ENSG00000115464.14	FALSE	ENSG00000115464	2	USP34	protein_coding	11357	ubiquitin specific peptidase 34 [Source:HGNC Symbol;Acc:HGNC:20066]	9736	Q70CQ2	Q70CQ2
0.192437	4.18896	1.9276	0.0682604	0.482524	ENSG00000130449.5	FALSE	ENSG00000130449	5	ZSWIM6	protein_coding	5501	zinc finger SWIM-type containing 6 [Source:HGNC Symbol;Acc:HGNC:29316]	57688	Q9HCJ5	Q9HCJ5
0.174123	5.56329	1.92741	0.0682858	0.482524	ENSG00000137770.13	FALSE	ENSG00000137770	15	CTDSPL2	protein_coding	6828	CTD small phosphatase like 2 [Source:HGNC Symbol;Acc:HGNC:26936]	51496	A0A024R5Q8	A0A024R5Q8
-0.150593	5.3333	-1.92739	0.0682879	0.482524	ENSG00000150347.15	FALSE	ENSG00000150347	10	ARID5B	protein_coding	7891	AT-rich interaction domain 5B [Source:HGNC Symbol;Acc:HGNC:17362]	84159	Q14865	Q14865
-0.898286	-1.80712	-1.92707	0.0683303	0.482524	ENSG00000164691.17	FALSE	ENSG00000164691	6	TAGAP	protein_coding	3887	T cell activation RhoGTPase activating protein [Source:HGNC Symbol;Acc:HGNC:15669]	117289	Q8N103	Q8N103
0.255999	2.54453	1.92689	0.068354	0.482524	ENSG00000138621.11	FALSE	ENSG00000138621	15	PPCDC	protein_coding	2250	phosphopantothenoylcysteine decarboxylase [Source:HGNC Symbol;Acc:HGNC:28107]	60490	H3BQB0	H3BQB0
-0.19553	3.90629	-1.92662	0.0683896	0.482524	ENSG00000138495.6	FALSE	ENSG00000138495	3	COX17	protein_coding	684	cytochrome c oxidase copper chaperone COX17 [Source:HGNC Symbol;Acc:HGNC:2264]	10063	Q14061	Q14061
0.177004	4.81349	1.9262	0.0684448	0.482524	ENSG00000105879.11	FALSE	ENSG00000105879	7	CBLL1	protein_coding	4432	Cbl proto-oncogene like 1 [Source:HGNC Symbol;Acc:HGNC:21225]	79872	Q75N03	Q75N03
0.124232	5.2821	1.92616	0.0684496	0.482524	ENSG00000072415.8	FALSE	ENSG00000072415	14	MPP5	protein_coding	5552	membrane palmitoylated protein 5 [Source:HGNC Symbol;Acc:HGNC:18669]	64398	Q8N3R9	Q8N3R9
0.315144	1.34919	1.92604	0.0684661	0.482524	ENSG00000188064.9	FALSE	ENSG00000188064	22	WNT7B	protein_coding	3919	Wnt family member 7B [Source:HGNC Symbol;Acc:HGNC:12787]	7477	P56706	P56706
0.196245	3.38519	1.92599	0.0684723	0.482524	ENSG00000071205.11	FALSE	ENSG00000071205	4	ARHGAP10	protein_coding	8188	Rho GTPase activating protein 10 [Source:HGNC Symbol;Acc:HGNC:26099]	79658	A1A4S6	A1A4S6
-0.519561	-0.455125	-1.92576	0.0685032	0.482524	ENSG00000243232.4	FALSE	ENSG00000243232	5	PCDHAC2	protein_coding	5963	protocadherin alpha subfamily C, 2 [Source:HGNC Symbol;Acc:HGNC:8677]	56134	Q9Y5I4	Q9Y5I4
0.183823	4.09779	1.92566	0.0685159	0.482524	ENSG00000117748.9	FALSE	ENSG00000117748	1	RPA2	protein_coding	1752	replication protein A2 [Source:HGNC Symbol;Acc:HGNC:10290]	6118	B4DUL2	B4DUL2
0.115975	6.12931	1.92539	0.0685522	0.482524	ENSG00000089916.17	FALSE	ENSG00000089916	14	GPATCH2L	protein_coding	14007	G-patch domain containing 2 like [Source:HGNC Symbol;Acc:HGNC:20210]	55668	A0A024R6E4	A0A024R6E4
0.334417	1.81612	1.92475	0.0686362	0.482524	ENSG00000166262.15	FALSE	ENSG00000166262	15	FAM227B	protein_coding	2204	family with sequence similarity 227 member B [Source:HGNC Symbol;Acc:HGNC:26543]	196951	Q96M60	Q96M60
0.167991	5.11462	1.92412	0.0687201	0.482524	ENSG00000146909.7	FALSE	ENSG00000146909	7	NOM1	protein_coding	6077	nucleolar protein with MIF4G domain 1 [Source:HGNC Symbol;Acc:HGNC:13244]	64434	Q5C9Z4	Q5C9Z4
-0.169145	3.95756	-1.9241	0.0687232	0.482524	ENSG00000104129.9	FALSE	ENSG00000104129	15	DNAJC17	protein_coding	3731	DnaJ heat shock protein family _Hsp40_ member C17 [Source:HGNC Symbol;Acc:HGNC:25556]	55192	Q9NVM6	Q9NVM6
-0.172473	4.70805	-1.92397	0.0687398	0.482524	ENSG00000154832.14	FALSE	ENSG00000154832	18	CXXC1	protein_coding	2936	CXXC finger protein 1 [Source:HGNC Symbol;Acc:HGNC:24343]	30827	Q9P0U4	Q9P0U4
0.140363	3.86197	1.92367	0.0687792	0.482524	ENSG00000177042.14	FALSE	ENSG00000177042	11	TMEM80	protein_coding	2047	transmembrane protein 80 [Source:HGNC Symbol;Acc:HGNC:27453]	283232	A0A0A0MS80	A0A0A0MS80
0.200697	4.83024	1.9236	0.068789	0.482524	ENSG00000155903.11	FALSE	ENSG00000155903	3	RASA2	protein_coding	5614	RAS p21 protein activator 2 [Source:HGNC Symbol;Acc:HGNC:9872]	5922	Q15283	Q15283
-0.0915856	5.42455	-1.92359	0.0687896	0.482524	ENSG00000143379.12	FALSE	ENSG00000143379	1	SETDB1	protein_coding	4437	SET domain bifurcated 1 [Source:HGNC Symbol;Acc:HGNC:10761]	9869	Q15047	Q15047
0.677662	-0.370624	1.9226	0.0689219	0.482801	ENSG00000160345.12	FALSE	ENSG00000160345	9	C9ORF116	protein_coding	1278	chromosome 9 open reading frame 116 [Source:HGNC Symbol;Acc:HGNC:28435]	138162	Q5BN46	Q5BN46
0.51435	-2.19543	1.92247	0.068939	0.482801	ENSG00000123500.9	FALSE	ENSG00000123500	6	COL10A1	protein_coding	3498	collagen type X alpha 1 chain [Source:HGNC Symbol;Acc:HGNC:2185]	1300	Q03692	Q03692
1.31831	-2.20146	1.92246	0.0689399	0.482801	ENSG00000006283.17	FALSE	ENSG00000006283	17	CACNA1G	protein_coding	8138	calcium voltage-gated channel subunit alpha1 G [Source:HGNC Symbol;Acc:HGNC:1394]	8913	O43497	O43497
-0.174551	4.35631	-1.92193	0.0690104	0.483036	ENSG00000104812.14	FALSE	ENSG00000104812	19	GYS1	protein_coding	3574	glycogen synthase 1 [Source:HGNC Symbol;Acc:HGNC:4706]	2997	P13807	P13807
0.16294	4.41382	1.92043	0.0692108	0.483157	ENSG00000076513.16	FALSE	ENSG00000076513	12	ANKRD13A	protein_coding	4148	ankyrin repeat domain 13A [Source:HGNC Symbol;Acc:HGNC:21268]	88455	Q3ZTS7	Q3ZTS7
-0.135326	7.57898	-1.92042	0.0692115	0.483157	ENSG00000196262.13	FALSE	ENSG00000196262	7	PPIA	protein_coding	2238	peptidylprolyl isomerase A [Source:HGNC Symbol;Acc:HGNC:9253]	5478	P62937	P62937
-0.17838	5.31722	-1.92011	0.0692532	0.483157	ENSG00000107957.16	FALSE	ENSG00000107957	10	SH3PXD2A	protein_coding	11468	SH3 and PX domains 2A [Source:HGNC Symbol;Acc:HGNC:23664]	9644	B3KPL1	B3KPL1
-0.164984	6.55065	-1.91957	0.0693252	0.483157	ENSG00000114850.6	FALSE	ENSG00000114850	3	SSR3	protein_coding	3716	signal sequence receptor subunit 3 [Source:HGNC Symbol;Acc:HGNC:11325]	6747	Q9UNL2	Q9UNL2
-0.437343	4.15907	-1.9194	0.069347	0.483157	ENSG00000149150.8	FALSE	ENSG00000149150	11	SLC43A1	protein_coding	2598	solute carrier family 43 member 1 [Source:HGNC Symbol;Acc:HGNC:9225]	8501	A0A024R4Y3	A0A024R4Y3
0.327806	2.60497	1.91937	0.0693523	0.483157	ENSG00000251192.7	FALSE	ENSG00000251192	X	ZNF674	protein_coding	4073	zinc finger protein 674 [Source:HGNC Symbol;Acc:HGNC:17625]	641339	Q2M3X9	Q2M3X9
0.117506	4.93231	1.91902	0.0693986	0.483157	ENSG00000117153.15	FALSE	ENSG00000117153	1	KLHL12	protein_coding	3359	kelch like family member 12 [Source:HGNC Symbol;Acc:HGNC:19360]	59349	Q53G59	Q53G59
-0.141102	4.48066	-1.91842	0.0694793	0.483157	ENSG00000048162.20	FALSE	ENSG00000048162	5	NOP16	protein_coding	1258	NOP16 nucleolar protein [Source:HGNC Symbol;Acc:HGNC:26934]	51491	Q9Y3C1	Q9Y3C1
0.257524	3.66238	1.91815	0.0695152	0.483157	ENSG00000117533.14	FALSE	ENSG00000117533	1	VAMP4	protein_coding	5159	vesicle associated membrane protein 4 [Source:HGNC Symbol;Acc:HGNC:12645]	8674	O75379	O75379
0.174575	3.95304	1.91803	0.0695314	0.483157	ENSG00000198258.10	FALSE	ENSG00000198258	19	UBL5	protein_coding	1450	ubiquitin like 5 [Source:HGNC Symbol;Acc:HGNC:13736]	59286	A0A024R7B0	A0A024R7B0
-0.203863	2.98917	-1.91783	0.0695577	0.483157	ENSG00000225663.7	FALSE	ENSG00000225663	17	MCRIP1	protein_coding	2979	MAPK regulated corepressor interacting protein 1 [Source:HGNC Symbol;Acc:HGNC:28007]	348262	A0A024R8R5	A0A024R8R5
-0.163943	3.71532	-1.91782	0.0695594	0.483157	ENSG00000148331.11	FALSE	ENSG00000148331	9	ASB6	protein_coding	4535	ankyrin repeat and SOCS box containing 6 [Source:HGNC Symbol;Acc:HGNC:17181]	140459	F6TX30	F6TX30
-0.338235	1.78519	-1.9176	0.0695884	0.483157	ENSG00000140025.15	FALSE	ENSG00000140025	14	EFCAB11	protein_coding	3095	EF-hand calcium binding domain 11 [Source:HGNC Symbol;Acc:HGNC:20357]	90141	Q9BUY7	Q9BUY7
0.147542	5.66568	1.91743	0.0696117	0.483157	ENSG00000159256.12	FALSE	ENSG00000159256	21	MORC3	protein_coding	4246	MORC family CW-type zinc finger 3 [Source:HGNC Symbol;Acc:HGNC:23572]	23515	B4DHJ4	B4DHJ4
-0.735159	-2.21423	-1.91724	0.069636	0.483157	ENSG00000182578.13	FALSE	ENSG00000182578	5	CSF1R	protein_coding	3989	colony stimulating factor 1 receptor [Source:HGNC Symbol;Acc:HGNC:2433]	1436	P07333	P07333
0.190195	3.76075	1.91643	0.0697452	0.483157	ENSG00000119977.20	FALSE	ENSG00000119977	10	TCTN3	protein_coding	2739	tectonic family member 3 [Source:HGNC Symbol;Acc:HGNC:24519]	26123	Q6NUS6	Q6NUS6
0.312787	2.65099	1.91642	0.0697461	0.483157	ENSG00000164181.13	FALSE	ENSG00000164181	5	ELOVL7	protein_coding	4165	ELOVL fatty acid elongase 7 [Source:HGNC Symbol;Acc:HGNC:26292]	79993	A1L3X0	A1L3X0
-0.175144	3.45863	-1.91637	0.0697539	0.483157	ENSG00000100949.14	FALSE	ENSG00000100949	14	RABGGTA	protein_coding	2265	Rab geranylgeranyltransferase subunit alpha [Source:HGNC Symbol;Acc:HGNC:9795]	5875	Q92696	Q92696
-0.137311	5.85644	-1.91592	0.0698133	0.483157	ENSG00000108639.7	FALSE	ENSG00000108639	17	SYNGR2	protein_coding	3036	synaptogyrin 2 [Source:HGNC Symbol;Acc:HGNC:11499]	9144	O43760	O43760
-0.129481	5.82749	-1.91565	0.0698506	0.483157	ENSG00000109814.11	FALSE	ENSG00000109814	4	UGDH	protein_coding	3216	UDP-glucose 6-dehydrogenase [Source:HGNC Symbol;Acc:HGNC:12525]	7358	O60701	O60701
0.20356	3.42775	1.91466	0.0699827	0.483157	ENSG00000159259.7	FALSE	ENSG00000159259	21	CHAF1B	protein_coding	4480	chromatin assembly factor 1 subunit B [Source:HGNC Symbol;Acc:HGNC:1911]	8208	Q13112	Q13112
-0.0972123	5.5201	-1.91449	0.0700064	0.483157	ENSG00000006282.20	FALSE	ENSG00000006282	17	SPATA20	protein_coding	3539	spermatogenesis associated 20 [Source:HGNC Symbol;Acc:HGNC:26125]	64847	Q8TB22	Q8TB22
-0.151497	5.42621	-1.91446	0.0700104	0.483157	ENSG00000104960.15	FALSE	ENSG00000104960	19	PTOV1	protein_coding	1880	prostate tumor overexpressed 1 [Source:HGNC Symbol;Acc:HGNC:9632]	53635	Q86YD1	Q86YD1
0.149791	5.32793	1.91428	0.0700348	0.483157	ENSG00000101911.12	FALSE	ENSG00000101911	X	PRPS2	protein_coding	2511	phosphoribosyl pyrophosphate synthetase 2 [Source:HGNC Symbol;Acc:HGNC:9465]	5634	A0A140VK41	A0A140VK41
0.139479	4.55573	1.91331	0.0701651	0.483157	ENSG00000168566.12	FALSE	ENSG00000168566	6	SNRNP48	protein_coding	4173	small nuclear ribonucleoprotein U11/U12 subunit 48 [Source:HGNC Symbol;Acc:HGNC:21368]	154007	Q6IEG0	Q6IEG0
-0.281743	3.53843	-1.91327	0.0701704	0.483157	ENSG00000110042.7	FALSE	ENSG00000110042	11	DTX4	protein_coding	5642	deltex E3 ubiquitin ligase 4 [Source:HGNC Symbol;Acc:HGNC:29151]	23220	Q9Y2E6	Q9Y2E6
0.129454	4.22335	1.91316	0.0701852	0.483157	ENSG00000014919.12	FALSE	ENSG00000014919	10	COX15	protein_coding	2788	cytochrome c oxidase assembly homolog COX15 [Source:HGNC Symbol;Acc:HGNC:2263]	1355	Q7KZN9	Q7KZN9
0.109047	5.91162	1.91314	0.0701874	0.483157	ENSG00000144711.15	FALSE	ENSG00000144711	3	IQSEC1	protein_coding	5561	IQ motif and Sec7 domain 1 [Source:HGNC Symbol;Acc:HGNC:29112]	9922	A0A087WWK8	A0A087WWK8
0.205992	2.82136	1.91302	0.0702048	0.483157	ENSG00000131979.18	FALSE	ENSG00000131979	14	GCH1	protein_coding	2943	GTP cyclohydrolase 1 [Source:HGNC Symbol;Acc:HGNC:4193]	2643	A0A024R642	A0A024R642
0.255284	2.90162	1.91298	0.0702097	0.483157	ENSG00000196967.10	FALSE	ENSG00000196967	19	ZNF585A	protein_coding	8618	zinc finger protein 585A [Source:HGNC Symbol;Acc:HGNC:26305]	199704	Q6P3V2	Q6P3V2
0.124835	7.19375	1.91282	0.0702311	0.483157	ENSG00000108055.9	FALSE	ENSG00000108055	10	SMC3	protein_coding	4114	structural maintenance of chromosomes 3 [Source:HGNC Symbol;Acc:HGNC:2468]	9126	Q9UQE7	Q9UQE7
-0.18554	3.51017	-1.91231	0.0703002	0.483157	ENSG00000131370.15	FALSE	ENSG00000131370	3	SH3BP5	protein_coding	2822	SH3 domain binding protein 5 [Source:HGNC Symbol;Acc:HGNC:10827]	9467	A0A024R2J3	A0A024R2J3
-0.141708	5.20649	-1.9123	0.0703021	0.483157	ENSG00000159314.11	FALSE	ENSG00000159314	17	ARHGAP27	protein_coding	4754	Rho GTPase activating protein 27 [Source:HGNC Symbol;Acc:HGNC:31813]	201176	Q6ZUM4	Q6ZUM4
0.100158	6.50906	1.91184	0.0703639	0.483157	ENSG00000123240.16	FALSE	ENSG00000123240	10	OPTN	protein_coding	3521	optineurin [Source:HGNC Symbol;Acc:HGNC:17142]	10133	Q96CV9	Q96CV9
-0.114119	4.5992	-1.91166	0.0703881	0.483157	ENSG00000110717.12	FALSE	ENSG00000110717	11	NDUFS8	protein_coding	3072	NADH:ubiquinone oxidoreductase core subunit S8 [Source:HGNC Symbol;Acc:HGNC:7715]	4728	O00217	O00217
0.159447	4.13474	1.91152	0.0704065	0.483157	ENSG00000112773.15	FALSE	ENSG00000112773	6	TENT5A	protein_coding	5664	terminal nucleotidyltransferase 5A [Source:HGNC Symbol;Acc:HGNC:18345]	55603	Q96IP4	Q96IP4
0.123175	4.72704	1.91094	0.0704856	0.483157	ENSG00000163162.8	FALSE	ENSG00000163162	2	RNF149	protein_coding	2458	ring finger protein 149 [Source:HGNC Symbol;Acc:HGNC:23137]	284996	Q8NC42	Q8NC42
-0.185613	2.66537	-1.91075	0.0705119	0.483157	ENSG00000115457.9	FALSE	ENSG00000115457	2	IGFBP2	protein_coding	4414	insulin like growth factor binding protein 2 [Source:HGNC Symbol;Acc:HGNC:5471]	3485	P18065	P18065
0.180292	3.69202	1.91043	0.0705547	0.483157	ENSG00000136816.15	FALSE	ENSG00000136816	9	TOR1B	protein_coding	2769	torsin family 1 member B [Source:HGNC Symbol;Acc:HGNC:11995]	27348	O14657	O14657
-0.857805	1.93829	-1.91022	0.0705825	0.483157	ENSG00000176153.11	FALSE	ENSG00000176153	14	GPX2	protein_coding	1134	glutathione peroxidase 2 [Source:HGNC Symbol;Acc:HGNC:4554]	2877	P18283	P18283
-0.168374	7.79834	-1.90983	0.0706358	0.483157	ENSG00000169710.8	FALSE	ENSG00000169710	17	FASN	protein_coding	8565	fatty acid synthase [Source:HGNC Symbol;Acc:HGNC:3594]	2194	P49327	P49327
0.155812	6.08905	1.90972	0.0706508	0.483157	ENSG00000184203.7	FALSE	ENSG00000184203	3	PPP1R2	protein_coding	3450	protein phosphatase 1 regulatory inhibitor subunit 2 [Source:HGNC Symbol;Acc:HGNC:9288]	5504	P41236	P41236
-0.144947	3.97127	-1.90947	0.070685	0.483157	ENSG00000168758.10	FALSE	ENSG00000168758	2	SEMA4C	protein_coding	3776	semaphorin 4C [Source:HGNC Symbol;Acc:HGNC:10731]	54910	Q9C0C4	Q9C0C4
-0.179863	3.81145	-1.90924	0.0707161	0.483157	ENSG00000142156.14	FALSE	ENSG00000142156	21	COL6A1	protein_coding	4238	collagen type VI alpha 1 chain [Source:HGNC Symbol;Acc:HGNC:2211]	1291	P12109	P12109
0.0992054	6.01773	1.90921	0.0707206	0.483157	ENSG00000135870.11	FALSE	ENSG00000135870	1	RC3H1	protein_coding	11261	ring finger and CCCH-type domains 1 [Source:HGNC Symbol;Acc:HGNC:29434]	149041	B9EGU6	B9EGU6
-0.159886	3.24553	-1.90832	0.0708408	0.483157	ENSG00000105617.3	FALSE	ENSG00000105617	19	LENG1	protein_coding	1542	leukocyte receptor cluster member 1 [Source:HGNC Symbol;Acc:HGNC:15502]	79165	Q96BZ8	Q96BZ8
0.211802	5.55448	1.90791	0.070897	0.483157	ENSG00000100836.10	FALSE	ENSG00000100836	14	PABPN1	protein_coding	2768	poly_A_ binding protein nuclear 1 [Source:HGNC Symbol;Acc:HGNC:8565]	8106	Q86U42	Q86U42
0.121441	6.40431	1.90791	0.0708971	0.483157	ENSG00000108582.11	FALSE	ENSG00000108582	17	CPD	protein_coding	9394	carboxypeptidase D [Source:HGNC Symbol;Acc:HGNC:2301]	1362	O75976	O75976
0.133411	5.61182	1.90773	0.0709218	0.483157	ENSG00000072518.20	FALSE	ENSG00000072518	11	MARK2	protein_coding	4728	microtubule affinity regulating kinase 2 [Source:HGNC Symbol;Acc:HGNC:3332]	2011	Q7KZI7	Q7KZI7
-0.193275	3.73591	-1.90759	0.0709408	0.483157	ENSG00000149179.13	FALSE	ENSG00000149179	11	C11ORF49	protein_coding	2141	chromosome 11 open reading frame 49 [Source:HGNC Symbol;Acc:HGNC:28720]	79096	Q9H6J7	Q9H6J7
-0.179627	3.91345	-1.90732	0.0709771	0.483157	ENSG00000139832.4	FALSE	ENSG00000139832	13	RAB20	protein_coding	1518	RAB20, member RAS oncogene family [Source:HGNC Symbol;Acc:HGNC:18260]	55647	Q9NX57	Q9NX57
0.454862	1.91304	1.9071	0.0710068	0.483157	ENSG00000187720.14	FALSE	ENSG00000187720	15	THSD4	protein_coding	9200	thrombospondin type 1 domain containing 4 [Source:HGNC Symbol;Acc:HGNC:25835]	79875	Q6ZMP0	Q6ZMP0
0.11435	5.6203	1.90686	0.0710404	0.483157	ENSG00000186001.13	FALSE	ENSG00000186001	3	LRCH3	protein_coding	7394	leucine rich repeats and calponin homology domain containing 3 [Source:HGNC Symbol;Acc:HGNC:28637]	84859	B4DU23	B4DU23
-0.164513	4.69975	-1.90637	0.0711071	0.483157	ENSG00000184900.15	FALSE	ENSG00000184900	21	SUMO3	protein_coding	1921	small ubiquitin-like modifier 3 [Source:HGNC Symbol;Acc:HGNC:11124]	6612	P55854	P55854
-0.196282	4.03089	-1.90635	0.0711099	0.483157	ENSG00000134375.10	FALSE	ENSG00000134375	1	TIMM17A	protein_coding	2523	translocase of inner mitochondrial membrane 17A [Source:HGNC Symbol;Acc:HGNC:17315]	10440	Q99595	Q99595
-0.194011	3.15353	-1.90627	0.0711203	0.483157	ENSG00000143578.15	FALSE	ENSG00000143578	1	CREB3L4	protein_coding	1752	cAMP responsive element binding protein 3 like 4 [Source:HGNC Symbol;Acc:HGNC:18854]	148327	Q8TEY5	Q8TEY5
0.381904	1.56957	1.90615	0.071137	0.483157	ENSG00000188878.19	FALSE	ENSG00000188878	17	FBF1	protein_coding	4825	Fas binding factor 1 [Source:HGNC Symbol;Acc:HGNC:24674]	85302	Q8TES7	Q8TES7
-0.165885	3.50155	-1.90589	0.0711721	0.483157	ENSG00000116455.13	FALSE	ENSG00000116455	1	WDR77	protein_coding	2576	WD repeat domain 77 [Source:HGNC Symbol;Acc:HGNC:29652]	79084	Q9BQA1	Q9BQA1
0.162892	4.90857	1.90521	0.0712656	0.48354	ENSG00000086062.12	FALSE	ENSG00000086062	9	B4GALT1	protein_coding	4201	beta-1,4-galactosyltransferase 1 [Source:HGNC Symbol;Acc:HGNC:924]	2683	P15291	P15291
-0.155244	4.38434	-1.90466	0.071341	0.4836	ENSG00000123395.14	FALSE	ENSG00000123395	12	ATG101	protein_coding	1439	autophagy related 101 [Source:HGNC Symbol;Acc:HGNC:25679]	60673	A0A024R128	A0A024R128
0.153937	5.91008	1.9046	0.0713484	0.4836	ENSG00000163781.13	FALSE	ENSG00000163781	3	TOPBP1	protein_coding	6152	DNA topoisomerase II binding protein 1 [Source:HGNC Symbol;Acc:HGNC:17008]	11073	A0AV47	A0AV47
-0.120095	7.81313	-1.90384	0.0714537	0.483814	ENSG00000160789.19	FALSE	ENSG00000160789	1	LMNA	protein_coding	3190	lamin A/C [Source:HGNC Symbol;Acc:HGNC:6636]	4000	P02545	P02545
0.150752	4.29495	1.90378	0.0714615	0.483814	ENSG00000176087.14	FALSE	ENSG00000176087	5	SLC35A4	protein_coding	3617	solute carrier family 35 member A4 [Source:HGNC Symbol;Acc:HGNC:20753]	113829	Q96G79	Q96G79
-0.107573	10.8287	-1.90356	0.0714911	0.483814	ENSG00000096384.19	FALSE	ENSG00000096384	6	HSP90AB1	protein_coding	2674	heat shock protein 90 alpha family class B member 1 [Source:HGNC Symbol;Acc:HGNC:5258]	3326	A0A024RD80	A0A024RD80
-0.176475	6.01863	-1.90299	0.0715698	0.484014	ENSG00000101104.12	FALSE	ENSG00000101104	20	PABPC1L	protein_coding	2223	poly_A_ binding protein cytoplasmic 1 like [Source:HGNC Symbol;Acc:HGNC:15797]	80336	Q4VXU2	Q4VXU2
0.109187	5.80939	1.90281	0.0715946	0.484014	ENSG00000166454.9	FALSE	ENSG00000166454	16	ATMIN	protein_coding	5343	ATM interactor [Source:HGNC Symbol;Acc:HGNC:29034]	23300	O43313	O43313
0.187566	5.84725	1.90196	0.0717112	0.484551	ENSG00000178691.10	FALSE	ENSG00000178691	17	SUZ12	protein_coding	4491	SUZ12, polycomb repressive complex 2 subunit [Source:HGNC Symbol;Acc:HGNC:17101]	23512	J3QQW9	J3QQW9
0.174848	4.07845	1.90127	0.0718062	0.484921	ENSG00000111077.17	FALSE	ENSG00000111077	12	TNS2	protein_coding	5010	tensin 2 [Source:HGNC Symbol;Acc:HGNC:19737]	23371	Q63HR2	Q63HR2
-0.116346	8.92634	-1.90102	0.0718401	0.484921	ENSG00000074800.15	FALSE	ENSG00000074800	1	ENO1	protein_coding	2548	enolase 1 [Source:HGNC Symbol;Acc:HGNC:3350]	2023	P06733	P06733
-0.485948	2.60663	-1.90046	0.071918	0.485196	ENSG00000159921.15	FALSE	ENSG00000159921	9	GNE	protein_coding	5298	glucosamine _UDP-N-acetyl_-2-epimerase/N-acetylmannosamine kinase [Source:HGNC Symbol;Acc:HGNC:23657]	10020	Q9Y223	Q9Y223
0.151091	3.98632	1.89981	0.0720074	0.485549	ENSG00000128000.15	FALSE	ENSG00000128000	19	ZNF780B	protein_coding	8665	zinc finger protein 780B [Source:HGNC Symbol;Acc:HGNC:33109]	163131	A0A024R0P7	A0A024R0P7
0.311585	1.04447	1.89926	0.0720829	0.485642	ENSG00000106852.15	FALSE	ENSG00000106852	9	LHX6	protein_coding	3587	LIM homeobox 6 [Source:HGNC Symbol;Acc:HGNC:21735]	26468	Q9UPM6	Q9UPM6
-0.170502	4.61444	-1.89884	0.0721418	0.485642	ENSG00000179409.10	FALSE	ENSG00000179409	17	GEMIN4	protein_coding	4729	gem nuclear organelle associated protein 4 [Source:HGNC Symbol;Acc:HGNC:15717]	50628	P57678	P57678
-0.171049	5.09489	-1.89868	0.0721635	0.485642	ENSG00000165684.4	FALSE	ENSG00000165684	9	SNAPC4	protein_coding	5010	small nuclear RNA activating complex polypeptide 4 [Source:HGNC Symbol;Acc:HGNC:11137]	6621	A0A024R8F4	A0A024R8F4
0.166174	3.78341	1.89863	0.0721701	0.485642	ENSG00000075089.9	FALSE	ENSG00000075089	12	ACTR6	protein_coding	2464	ARP6 actin related protein 6 homolog [Source:HGNC Symbol;Acc:HGNC:24025]	64431	Q9GZN1	Q9GZN1
-0.439488	1.03168	-1.89818	0.0722324	0.485642	ENSG00000079435.9	FALSE	ENSG00000079435	19	LIPE	protein_coding	3813	lipase E, hormone sensitive type [Source:HGNC Symbol;Acc:HGNC:6621]	3991	A8K8W7	A8K8W7
-0.640414	0.269863	-1.89779	0.0722871	0.485642	ENSG00000106327.12	FALSE	ENSG00000106327	7	TFR2	protein_coding	3131	transferrin receptor 2 [Source:HGNC Symbol;Acc:HGNC:11762]	7036	Q9UP52	Q9UP52
0.174797	4.42489	1.89706	0.0723879	0.485642	ENSG00000119655.10	FALSE	ENSG00000119655	14	NPC2	protein_coding	1436	NPC intracellular cholesterol transporter 2 [Source:HGNC Symbol;Acc:HGNC:14537]	10577	A0A024R6C0	A0A024R6C0
[truncated: 11,123 more rows]
